# Supplementary material for: Transcriptomic Signature and Pro-Osteoclastic Secreted Factors of Abnormal Bone-Marrow Stromal Cells in Fibrous Dysplasia
Source: MDPI journal article supplement (doi:10.3390/cells13090774), 2024-04-30
Supplement: s1 [file s1]

**Table S1. FD patient plasma donor demographics**

| <b>Characteristics (N=57)</b> | <b>N (%) or Mean (range)</b> |
|-------------------------------|------------------------------|
| Females                       | 32 (56%)                     |
| Age at blood draw (years)     | 22 (4-58)                    |
| Skeletal burden score         | 35.46 (0.5-75)               |
| MAS features                  |                              |
| Skin hyperpigmentation        | 42 (74%)                     |
| Precocious puberty            | 26 (46%)                     |
| Growth hormone excess         | 23 (40%)                     |
| Hyperthyroidism               | 20 (35%)                     |
| Hypophosphatemia              | 23 (40%)                     |
| Cushing syndrome              | 4 (7%)                       |

**Table S2. BMSC donor demographics**

| <b>Characteristics</b>                         | <b>FD patients<br/>N (%) or Mean (range)</b> | <b>Healthy volunteers<br/>N (%) or Mean (range)</b> |
|------------------------------------------------|----------------------------------------------|-----------------------------------------------------|
| Females                                        | 3 (50%)                                      | 1 (16.66%)                                          |
| Age at sample donation (years)                 | 13.33 (3-32)                                 | 27.66 (22-36)                                       |
| Culture heterozygosity (% GNAS p.R201C/H mRNA) | 17.16% (7-55%)                               | N/A                                                 |
| Sample source location                         |                                              |                                                     |
| Iliac crest                                    |                                              | 6 (100%)                                            |
| Femur                                          | 6 (100%)                                     |                                                     |
