# Supplementary material for: Transcriptomic Signature and Pro-Osteoclastic Secreted Factors of Abnormal Bone-Marrow Stromal Cells in Fibrous Dysplasia
Source: Cells. 2024 Apr 30;13(9):774. doi: 10.3390/cells13090774 (PMC11083355; doi:10.3390/cells13090774)
Supplement: Supplementary file 1 [file cells-13-00774-s001.zip › Tables S3-S5 - Gene Lists.xlsx]

## Sheet: Table S3
Table S3: List of genes with significant changes in GαsR201C-expressing mouse BMSCs versus WT mouse BMSCs, padj<0.05
gene_name	ensembl_gene_id	log2FoldChange	padj	description	Enrichr analysis (padj<0.01, log2Fold change ±1.5)
Vcan	ENSMUSG00000021614	2.78476	0	versican [Source:MGI Symbol;Acc:MGI:102889]	Yes
tg_GNAS-R201C-EE	tg_GNAS-R201C-EE	12.336	0	NA	Yes
tg_hspCas9	tg_hspCas9	6.16894	0	NA	Yes
Vdr	ENSMUSG00000022479	4.93737	1.46803e-285	vitamin D (1,25-dihydroxyvitamin D3) receptor [Source:MGI Symbol;Acc:MGI:103076]	Yes
Ccbe1	ENSMUSG00000046318	-2.74363	3.41025e-233	collagen and calcium binding EGF domains 1 [Source:MGI Symbol;Acc:MGI:2445053]	Yes
Pde4d	ENSMUSG00000021699	3.1525	3.79467e-209	phosphodiesterase 4D, cAMP specific [Source:MGI Symbol;Acc:MGI:99555]	Yes
Igfbp5	ENSMUSG00000026185	4.60158	1.98972e-190	insulin-like growth factor binding protein 5 [Source:MGI Symbol;Acc:MGI:96440]	Yes
Sorbs2	ENSMUSG00000031626	-5.72651	8.4836e-167	sorbin and SH3 domain containing 2 [Source:MGI Symbol;Acc:MGI:1924574]	Yes
Csrp2	ENSMUSG00000020186	3.77121	1.51582e-146	cysteine and glycine-rich protein 2 [Source:MGI Symbol;Acc:MGI:1202907]	Yes
Tmem100	ENSMUSG00000069763	4.52442	3.92469e-141	transmembrane protein 100 [Source:MGI Symbol;Acc:MGI:1915138]	Yes
Cp	ENSMUSG00000003617	-4.76987	3.00609e-136	ceruloplasmin [Source:MGI Symbol;Acc:MGI:88476]	Yes
Npnt	ENSMUSG00000040998	-2.71395	1.88437e-130	nephronectin [Source:MGI Symbol;Acc:MGI:2148811]	Yes
Gja1	ENSMUSG00000050953	2.39899	4.38012e-124	gap junction protein, alpha 1 [Source:MGI Symbol;Acc:MGI:95713]	Yes
Lmcd1	ENSMUSG00000057604	-3.82426	2.33753e-121	LIM and cysteine-rich domains 1 [Source:MGI Symbol;Acc:MGI:1353635]	Yes
Slc25a25	ENSMUSG00000026819	3.97206	6.40016e-113	solute carrier family 25 (mitochondrial carrier, phosphate carrier), member 25 [Source:MGI Symbol;Acc:MGI:1915913]	Yes
Chst11	ENSMUSG00000034612	1.58425	1.11023e-105	carbohydrate sulfotransferase 11 [Source:MGI Symbol;Acc:MGI:1927166]	Yes
Hdac4	ENSMUSG00000026313	2.06028	1.42591e-102	histone deacetylase 4 [Source:MGI Symbol;Acc:MGI:3036234]	Yes
Gpd2	ENSMUSG00000026827	2.09588	4.66654e-102	glycerol phosphate dehydrogenase 2, mitochondrial [Source:MGI Symbol;Acc:MGI:99778]	Yes
Jade1	ENSMUSG00000025764	1.86231	1.54869e-99	jade family PHD finger 1 [Source:MGI Symbol;Acc:MGI:1925835]	Yes
Gm12248	ENSMUSG00000086962	4.95269	1.99177e-96	predicted gene 12248 [Source:MGI Symbol;Acc:MGI:3651124]	Yes
Rgs3	ENSMUSG00000059810	-3.13996	3.53283e-93	regulator of G-protein signaling 3 [Source:MGI Symbol;Acc:MGI:1354734]	Yes
Pde3b	ENSMUSG00000030671	3.13898	1.07265e-92	phosphodiesterase 3B, cGMP-inhibited [Source:MGI Symbol;Acc:MGI:1333863]	Yes
Pmepa1	ENSMUSG00000038400	1.75142	2.0142e-91	prostate transmembrane protein, androgen induced 1 [Source:MGI Symbol;Acc:MGI:1929600]	Yes
Spon2	ENSMUSG00000037379	2.94061	6.78467e-89	spondin 2, extracellular matrix protein [Source:MGI Symbol;Acc:MGI:1923724]	Yes
Ppp1r3c	ENSMUSG00000067279	2.1741	6.32178e-87	protein phosphatase 1, regulatory subunit 3C [Source:MGI Symbol;Acc:MGI:1858229]	Yes
Pdp1	ENSMUSG00000049225	-2.55194	7.91726e-87	pyruvate dehydrogenase phosphatase catalytic subunit 1 [Source:MGI Symbol;Acc:MGI:2685870]	Yes
Nr4a2	ENSMUSG00000026826	3.72422	9.89556e-86	nuclear receptor subfamily 4, group A, member 2 [Source:MGI Symbol;Acc:MGI:1352456]	Yes
Ahr	ENSMUSG00000019256	-2.80236	3.41026e-84	aryl-hydrocarbon receptor [Source:MGI Symbol;Acc:MGI:105043]	Yes
Cd34	ENSMUSG00000016494	1.55451	1.02053e-81	CD34 antigen [Source:MGI Symbol;Acc:MGI:88329]	Yes
Sorcs1	ENSMUSG00000043531	3.62306	6.66576e-81	sortilin-related VPS10 domain containing receptor 1 [Source:MGI Symbol;Acc:MGI:1929666]	Yes
Adarb1	ENSMUSG00000020262	1.67074	1.31024e-79	adenosine deaminase, RNA-specific, B1 [Source:MGI Symbol;Acc:MGI:891999]	Yes
Pde10a	ENSMUSG00000023868	1.73045	1.52508e-76	phosphodiesterase 10A [Source:MGI Symbol;Acc:MGI:1345143]	Yes
Pcdh9	ENSMUSG00000055421	-2.27797	5.47306e-75	protocadherin 9 [Source:MGI Symbol;Acc:MGI:1306801]	Yes
Arid5b	ENSMUSG00000019947	-2.03681	3.46138e-74	AT rich interactive domain 5B (MRF1-like) [Source:MGI Symbol;Acc:MGI:2175912]	Yes
Ncam1	ENSMUSG00000039542	1.98112	4.88565e-71	neural cell adhesion molecule 1 [Source:MGI Symbol;Acc:MGI:97281]	Yes
Ptx3	ENSMUSG00000027832	-1.96259	2.2506e-70	pentraxin related gene [Source:MGI Symbol;Acc:MGI:104641]	Yes
Pde8b	ENSMUSG00000021684	1.82127	4.97121e-70	phosphodiesterase 8B [Source:MGI Symbol;Acc:MGI:2443999]	Yes
C1qtnf6	ENSMUSG00000022440	1.86402	4.16452e-69	C1q and tumor necrosis factor related protein 6 [Source:MGI Symbol;Acc:MGI:1919959]	Yes
2310022B05Rik	ENSMUSG00000031983	-1.75009	1.60879e-67	RIKEN cDNA 2310022B05 gene [Source:MGI Symbol;Acc:MGI:1916801]	Yes
Gas6	ENSMUSG00000031451	-1.15702	1.15517e-66	growth arrest specific 6 [Source:MGI Symbol;Acc:MGI:95660]
Sulf1	ENSMUSG00000016918	1.97906	1.87303e-66	sulfatase 1 [Source:MGI Symbol;Acc:MGI:2138563]	Yes
Prss12	ENSMUSG00000027978	2.06709	3.10171e-66	protease, serine 12 neurotrypsin (motopsin) [Source:MGI Symbol;Acc:MGI:1100881]	Yes
Col27a1	ENSMUSG00000045672	-2.59364	4.25951e-66	collagen, type XXVII, alpha 1 [Source:MGI Symbol;Acc:MGI:2672118]	Yes
Nnmt	ENSMUSG00000032271	-1.78072	7.13e-66	nicotinamide N-methyltransferase [Source:MGI Symbol;Acc:MGI:1099443]	Yes
Enpp5	ENSMUSG00000023960	-2.04129	2.15725e-64	ectonucleotide pyrophosphatase/phosphodiesterase 5 [Source:MGI Symbol;Acc:MGI:1933830]	Yes
Sod3	ENSMUSG00000072941	1.67621	6.39396e-64	superoxide dismutase 3, extracellular [Source:MGI Symbol;Acc:MGI:103181]	Yes
Plekhh2	ENSMUSG00000040852	-1.77768	9.99447e-64	pleckstrin homology domain containing, family H (with MyTH4 domain) member 2 [Source:MGI Symbol;Acc:MGI:2146813]	Yes
Parm1	ENSMUSG00000034981	2.7283	2.40951e-62	prostate androgen-regulated mucin-like protein 1 [Source:MGI Symbol;Acc:MGI:2443349]	Yes
Acsl4	ENSMUSG00000031278	1.99212	3.5393e-62	acyl-CoA synthetase long-chain family member 4 [Source:MGI Symbol;Acc:MGI:1354713]	Yes
Colec12	ENSMUSG00000036103	-1.10576	1.12408e-59	collectin sub-family member 12 [Source:MGI Symbol;Acc:MGI:2152907]
Emb	ENSMUSG00000021728	1.67772	8.33804e-58	embigin [Source:MGI Symbol;Acc:MGI:95321]	Yes
Medag	ENSMUSG00000029659	1.74361	2.60464e-57	mesenteric estrogen dependent adipogenesis [Source:MGI Symbol;Acc:MGI:1917967]	Yes
Ccdc80	ENSMUSG00000022665	-1.95291	7.11469e-57	coiled-coil domain containing 80 [Source:MGI Symbol;Acc:MGI:1915146]	Yes
Gfpt2	ENSMUSG00000020363	2.10854	5.32475e-56	glutamine fructose-6-phosphate transaminase 2 [Source:MGI Symbol;Acc:MGI:1338883]	Yes
Fam43a	ENSMUSG00000046546	-2.40608	6.9713e-56	family with sequence similarity 43, member A [Source:MGI Symbol;Acc:MGI:2676309]	Yes
Gm2115	ENSMUSG00000097789	-2.21169	7.38111e-56	predicted gene 2115 [Source:MGI Symbol;Acc:MGI:3780284]	Yes
Fgfr2	ENSMUSG00000030849	-1.36762	1.72379e-55	fibroblast growth factor receptor 2 [Source:MGI Symbol;Acc:MGI:95523]
Serpina3f	ENSMUSG00000066363	-5.63408	2.57874e-55	serine (or cysteine) peptidase inhibitor, clade A, member 3F [Source:MGI Symbol;Acc:MGI:2182838]	Yes
Brinp3	ENSMUSG00000035131	2.13813	4.7122e-55	bone morphogenetic protein/retinoic acid inducible neural specific 3 [Source:MGI Symbol;Acc:MGI:2443035]	Yes
Fzd5	ENSMUSG00000045005	-1.86918	6.83598e-54	frizzled class receptor 5 [Source:MGI Symbol;Acc:MGI:108571]	Yes
Palm3	ENSMUSG00000047986	-2.89181	7.78751e-54	paralemmin 3 [Source:MGI Symbol;Acc:MGI:1921587]	Yes
Fibin	ENSMUSG00000074971	2.44857	1.98048e-53	fin bud initiation factor homolog (zebrafish) [Source:MGI Symbol;Acc:MGI:1914856]	Yes
Sfrp4	ENSMUSG00000021319	2.74859	5.76002e-53	secreted frizzled-related protein 4 [Source:MGI Symbol;Acc:MGI:892010]	Yes
C1ra	ENSMUSG00000055172	-1.29074	2.18565e-52	complement component 1, r subcomponent A [Source:MGI Symbol;Acc:MGI:1355313]
Enpep	ENSMUSG00000028024	1.76143	2.42565e-52	glutamyl aminopeptidase [Source:MGI Symbol;Acc:MGI:106645]	Yes
Ildr2	ENSMUSG00000040612	-4.36821	9.38313e-52	immunoglobulin-like domain containing receptor 2 [Source:MGI Symbol;Acc:MGI:1196370]	Yes
Dio2	ENSMUSG00000007682	2.35505	1.41205e-50	deiodinase, iodothyronine, type II [Source:MGI Symbol;Acc:MGI:1338833]	Yes
Tnn	ENSMUSG00000026725	-3.41517	1.72818e-50	tenascin N [Source:MGI Symbol;Acc:MGI:2665790]	Yes
Phldb2	ENSMUSG00000033149	-1.30179	1.93733e-50	pleckstrin homology like domain, family B, member 2 [Source:MGI Symbol;Acc:MGI:2444981]
Plin4	ENSMUSG00000002831	-4.15446	4.02082e-50	perilipin 4 [Source:MGI Symbol;Acc:MGI:1929709]	Yes
Hsph1	ENSMUSG00000029657	1.53894	4.75411e-50	heat shock 105kDa/110kDa protein 1 [Source:MGI Symbol;Acc:MGI:105053]	Yes
Nr4a1	ENSMUSG00000023034	1.70439	5.84122e-50	nuclear receptor subfamily 4, group A, member 1 [Source:MGI Symbol;Acc:MGI:1352454]	Yes
Prss35	ENSMUSG00000033491	2.73511	6.83889e-50	protease, serine 35 [Source:MGI Symbol;Acc:MGI:2444800]	Yes
Arc	ENSMUSG00000022602	-4.37732	6.86813e-50	activity regulated cytoskeletal-associated protein [Source:MGI Symbol;Acc:MGI:88067]	Yes
Crabp2	ENSMUSG00000004885	2.21219	7.20549e-50	cellular retinoic acid binding protein II [Source:MGI Symbol;Acc:MGI:88491]	Yes
Pik3ip1	ENSMUSG00000034614	-1.18665	1.56786e-49	phosphoinositide-3-kinase interacting protein 1 [Source:MGI Symbol;Acc:MGI:1917016]
Col12a1	ENSMUSG00000032332	-1.52672	4.16198e-49	collagen, type XII, alpha 1 [Source:MGI Symbol;Acc:MGI:88448]	Yes
Slc16a1	ENSMUSG00000032902	2.72264	7.45787e-49	solute carrier family 16 (monocarboxylic acid transporters), member 1 [Source:MGI Symbol;Acc:MGI:106013]	Yes
Itgbl1	ENSMUSG00000032925	-1.21278	7.45787e-49	integrin, beta-like 1 [Source:MGI Symbol;Acc:MGI:2443439]
Dcn	ENSMUSG00000019929	-1.38452	9.52348e-49	decorin [Source:MGI Symbol;Acc:MGI:94872]
1500009L16Rik	ENSMUSG00000087651	-2.94431	2.68351e-48	RIKEN cDNA 1500009L16 gene [Source:MGI Symbol;Acc:MGI:1917034]	Yes
Rnf122	ENSMUSG00000039328	2.33821	3.42438e-48	ring finger protein 122 [Source:MGI Symbol;Acc:MGI:1916117]	Yes
Adgrl3	ENSMUSG00000037605	3.61951	6.228e-48	adhesion G protein-coupled receptor L3 [Source:MGI Symbol;Acc:MGI:2441950]	Yes
Ltbp2	ENSMUSG00000002020	-1.72935	1.05467e-47	latent transforming growth factor beta binding protein 2 [Source:MGI Symbol;Acc:MGI:99502]	Yes
Pde4b	ENSMUSG00000028525	2.4649	1.56833e-47	phosphodiesterase 4B, cAMP specific [Source:MGI Symbol;Acc:MGI:99557]	Yes
Apcdd1	ENSMUSG00000071847	2.23708	4.05477e-47	adenomatosis polyposis coli down-regulated 1 [Source:MGI Symbol;Acc:MGI:3513977]	Yes
Gli2	ENSMUSG00000048402	2.67413	4.21983e-46	GLI-Kruppel family member GLI2 [Source:MGI Symbol;Acc:MGI:95728]	Yes
Ptp4a3	ENSMUSG00000059895	-1.21821	5.41741e-45	protein tyrosine phosphatase 4a3 [Source:MGI Symbol;Acc:MGI:1277098]
Irs1	ENSMUSG00000055980	-1.29738	7.17184e-45	insulin receptor substrate 1 [Source:MGI Symbol;Acc:MGI:99454]
Hspb7	ENSMUSG00000006221	-4.29105	8.13044e-45	heat shock protein family, member 7 (cardiovascular) [Source:MGI Symbol;Acc:MGI:1352494]	Yes
Lum	ENSMUSG00000036446	-1.79436	1.30659e-44	lumican [Source:MGI Symbol;Acc:MGI:109347]	Yes
Mustn1	ENSMUSG00000042485	-3.34987	1.90053e-44	musculoskeletal, embryonic nuclear protein 1 [Source:MGI Symbol;Acc:MGI:1913425]	Yes
Tcim	ENSMUSG00000056313	2.63731	1.90649e-44	transcriptional and immune response regulator [Source:MGI Symbol;Acc:MGI:1916318]	Yes
Sorl1	ENSMUSG00000049313	2.93704	2.37494e-44	sortilin-related receptor, LDLR class A repeats-containing [Source:MGI Symbol;Acc:MGI:1202296]	Yes
Gfra2	ENSMUSG00000022103	-4.26726	5.10291e-44	glial cell line derived neurotrophic factor family receptor alpha 2 [Source:MGI Symbol;Acc:MGI:1195462]	Yes
Ptprs	ENSMUSG00000013236	1.12953	7.35941e-44	protein tyrosine phosphatase, receptor type, S [Source:MGI Symbol;Acc:MGI:97815]
Jph2	ENSMUSG00000017817	-1.9923	1.27066e-43	junctophilin 2 [Source:MGI Symbol;Acc:MGI:1891496]	Yes
Il34	ENSMUSG00000031750	-1.27623	2.81875e-43	interleukin 34 [Source:MGI Symbol;Acc:MGI:1923777]
Hspb1	ENSMUSG00000004951	-2.42129	3.18752e-43	heat shock protein 1 [Source:MGI Symbol;Acc:MGI:96240]	Yes
Robo2	ENSMUSG00000052516	-1.53657	3.5724e-43	roundabout guidance receptor 2 [Source:MGI Symbol;Acc:MGI:1890110]	Yes
Crem	ENSMUSG00000063889	1.83808	3.5724e-43	cAMP responsive element modulator [Source:MGI Symbol;Acc:MGI:88495]	Yes
Ncam2	ENSMUSG00000022762	3.47378	1.9858e-42	neural cell adhesion molecule 2 [Source:MGI Symbol;Acc:MGI:97282]	Yes
Xylt1	ENSMUSG00000030657	2.15128	2.93758e-42	xylosyltransferase 1 [Source:MGI Symbol;Acc:MGI:2451073]	Yes
Sdc2	ENSMUSG00000022261	-1.29551	5.42303e-42	syndecan 2 [Source:MGI Symbol;Acc:MGI:1349165]
Maml2	ENSMUSG00000031925	-1.27306	1.80998e-41	mastermind like transcriptional coactivator 2 [Source:MGI Symbol;Acc:MGI:2389460]
Ltbp1	ENSMUSG00000001870	1.4488	1.93079e-41	latent transforming growth factor beta binding protein 1 [Source:MGI Symbol;Acc:MGI:109151]
Serpina3n	ENSMUSG00000021091	-1.8602	2.242e-41	serine (or cysteine) peptidase inhibitor, clade A, member 3N [Source:MGI Symbol;Acc:MGI:105045]	Yes
Lgr5	ENSMUSG00000020140	-4.02111	3.44269e-41	leucine rich repeat containing G protein coupled receptor 5 [Source:MGI Symbol;Acc:MGI:1341817]	Yes
Vipr2	ENSMUSG00000011171	2.43022	4.74285e-41	vasoactive intestinal peptide receptor 2 [Source:MGI Symbol;Acc:MGI:107166]	Yes
Klhl13	ENSMUSG00000036782	1.72733	5.63819e-41	kelch-like 13 [Source:MGI Symbol;Acc:MGI:1914705]	Yes
Chst15	ENSMUSG00000030930	-3.06379	1.28354e-40	carbohydrate sulfotransferase 15 [Source:MGI Symbol;Acc:MGI:1924840]	Yes
Cmya5	ENSMUSG00000047419	-2.21987	1.55161e-40	cardiomyopathy associated 5 [Source:MGI Symbol;Acc:MGI:1923719]	Yes
Macrod1	ENSMUSG00000036278	-2.34591	2.2348e-40	mono-ADP ribosylhydrolase 1 [Source:MGI Symbol;Acc:MGI:2147583]	Yes
Tmem140	ENSMUSG00000057137	-1.29046	3.18564e-40	transmembrane protein 140 [Source:MGI Symbol;Acc:MGI:1915737]
Setbp1	ENSMUSG00000024548	-1.22134	3.34512e-40	SET binding protein 1 [Source:MGI Symbol;Acc:MGI:1933199]
Myoc	ENSMUSG00000026697	-3.40298	3.70158e-40	myocilin [Source:MGI Symbol;Acc:MGI:1202864]	Yes
Mylk	ENSMUSG00000022836	-3.00302	9.35334e-40	myosin, light polypeptide kinase [Source:MGI Symbol;Acc:MGI:894806]	Yes
Mapkapk2	ENSMUSG00000016528	0.98897	2.12296e-39	MAP kinase-activated protein kinase 2 [Source:MGI Symbol;Acc:MGI:109298]
Aldh1a1	ENSMUSG00000053279	-1.66806	3.06996e-39	aldehyde dehydrogenase family 1, subfamily A1 [Source:MGI Symbol;Acc:MGI:1353450]	Yes
Aldh1a1-1	ENSMUSG00000053279	-1.66806	3.06996e-39	aldehyde dehydrogenase family 1, subfamily A1 [Source:MGI Symbol;Acc:MGI:1353450]	Yes
Pls3	ENSMUSG00000016382	-0.788301	9.88935e-39	plastin 3 (T-isoform) [Source:MGI Symbol;Acc:MGI:104807]
Arnt2	ENSMUSG00000015709	-1.71686	1.2572e-38	aryl hydrocarbon receptor nuclear translocator 2 [Source:MGI Symbol;Acc:MGI:107188]	Yes
Hivep3	ENSMUSG00000028634	-1.98473	1.3528e-38	human immunodeficiency virus type I enhancer binding protein 3 [Source:MGI Symbol;Acc:MGI:106589]	Yes
Clu	ENSMUSG00000022037	-2.26238	1.60253e-38	clusterin [Source:MGI Symbol;Acc:MGI:88423]	Yes
Cyth3	ENSMUSG00000018001	-1.63573	4.02185e-38	cytohesin 3 [Source:MGI Symbol;Acc:MGI:1335107]	Yes
Myo1d	ENSMUSG00000035441	-1.00699	4.27031e-38	myosin ID [Source:MGI Symbol;Acc:MGI:107728]
Cilp	ENSMUSG00000042254	-3.06459	4.74126e-38	cartilage intermediate layer protein, nucleotide pyrophosphohydrolase [Source:MGI Symbol;Acc:MGI:2444507]	Yes
Tnmd	ENSMUSG00000031250	-2.1186	1.24057e-37	tenomodulin [Source:MGI Symbol;Acc:MGI:1929885]	Yes
Snai2	ENSMUSG00000022676	-1.44939	1.46839e-37	snail family zinc finger 2 [Source:MGI Symbol;Acc:MGI:1096393]
Slc4a7	ENSMUSG00000021733	1.38749	2.44594e-37	solute carrier family 4, sodium bicarbonate cotransporter, member 7 [Source:MGI Symbol;Acc:MGI:2443878]
Uap1	ENSMUSG00000026670	1.43374	3.17827e-37	UDP-N-acetylglucosamine pyrophosphorylase 1 [Source:MGI Symbol;Acc:MGI:1334459]
Hs3st1	ENSMUSG00000051022	2.94943	3.36804e-37	heparan sulfate (glucosamine) 3-O-sulfotransferase 1 [Source:MGI Symbol;Acc:MGI:1201606]	Yes
Tenm3	ENSMUSG00000031561	1.65912	1.05058e-36	teneurin transmembrane protein 3 [Source:MGI Symbol;Acc:MGI:1345183]	Yes
Slc1a6	ENSMUSG00000005357	-2.93503	1.09687e-36	solute carrier family 1 (high affinity aspartate/glutamate transporter), member 6 [Source:MGI Symbol;Acc:MGI:1096331]	Yes
Smarca1	ENSMUSG00000031099	-1.40324	1.16466e-36	SWI/SNF related, matrix associated, actin dependent regulator of chromatin, subfamily a, member 1 [Source:MGI Symbol;Acc:MGI:1935127]
Nuak1	ENSMUSG00000020032	-1.06683	1.41889e-36	NUAK family, SNF1-like kinase, 1 [Source:MGI Symbol;Acc:MGI:1925226]
H6pd	ENSMUSG00000028980	-0.966261	1.56887e-36	hexose-6-phosphate dehydrogenase (glucose 1-dehydrogenase) [Source:MGI Symbol;Acc:MGI:2140356]
Hdac5	ENSMUSG00000008855	-1.32127	2.24776e-36	histone deacetylase 5 [Source:MGI Symbol;Acc:MGI:1333784]
Comp	ENSMUSG00000031849	-1.80041	3.44708e-36	cartilage oligomeric matrix protein [Source:MGI Symbol;Acc:MGI:88469]	Yes
Ackr4	ENSMUSG00000079355	-1.02948	1.23705e-35	atypical chemokine receptor 4 [Source:MGI Symbol;Acc:MGI:2181676]
Cdc42ep3	ENSMUSG00000036533	-2.2831	4.24457e-35	CDC42 effector protein (Rho GTPase binding) 3 [Source:MGI Symbol;Acc:MGI:2384718]	Yes
Pcsk5	ENSMUSG00000024713	2.44589	4.93158e-35	proprotein convertase subtilisin/kexin type 5 [Source:MGI Symbol;Acc:MGI:97515]	Yes
Csf1	ENSMUSG00000014599	-1.51097	5.19349e-35	colony stimulating factor 1 (macrophage) [Source:MGI Symbol;Acc:MGI:1339753]	Yes
Slc24a3	ENSMUSG00000063873	-2.43529	5.99277e-35	solute carrier family 24 (sodium/potassium/calcium exchanger), member 3 [Source:MGI Symbol;Acc:MGI:2137513]	Yes
Atxn1	ENSMUSG00000046876	-1.07975	1.26005e-34	ataxin 1 [Source:MGI Symbol;Acc:MGI:104783]
Amph	ENSMUSG00000021314	2.45262	1.28784e-34	amphiphysin [Source:MGI Symbol;Acc:MGI:103574]	Yes
Igfbp2	ENSMUSG00000039323	-3.81507	2.3106e-34	insulin-like growth factor binding protein 2 [Source:MGI Symbol;Acc:MGI:96437]	Yes
Fbn2	ENSMUSG00000024598	-2.52644	1.43079e-33	fibrillin 2 [Source:MGI Symbol;Acc:MGI:95490]	Yes
Dsel	ENSMUSG00000038702	1.17948	2.26446e-33	dermatan sulfate epimerase-like [Source:MGI Symbol;Acc:MGI:2442948]
Nppc	ENSMUSG00000026241	5.42457	4.49785e-33	natriuretic peptide type C [Source:MGI Symbol;Acc:MGI:97369]	Yes
Inmt	ENSMUSG00000003477	5.93518	9.46339e-33	indolethylamine N-methyltransferase [Source:MGI Symbol;Acc:MGI:102963]	Yes
Lmo7	ENSMUSG00000033060	-1.78312	1.14536e-32	LIM domain only 7 [Source:MGI Symbol;Acc:MGI:1353586]	Yes
Prelp	ENSMUSG00000041577	-1.5735	1.60268e-32	proline arginine-rich end leucine-rich repeat [Source:MGI Symbol;Acc:MGI:2151110]	Yes
S100a10	ENSMUSG00000041959	0.846482	1.89155e-32	S100 calcium binding protein A10 (calpactin) [Source:MGI Symbol;Acc:MGI:1339468]
Net1	ENSMUSG00000021215	1.20761	2.05265e-32	neuroepithelial cell transforming gene 1 [Source:MGI Symbol;Acc:MGI:1927138]
Rasa3	ENSMUSG00000031453	-1.22138	2.05265e-32	RAS p21 protein activator 3 [Source:MGI Symbol;Acc:MGI:1197013]
Bhlhe40	ENSMUSG00000030103	1.33135	2.38637e-32	basic helix-loop-helix family, member e40 [Source:MGI Symbol;Acc:MGI:1097714]
Rorb	ENSMUSG00000036192	3.93793	5.07094e-32	RAR-related orphan receptor beta [Source:MGI Symbol;Acc:MGI:1343464]	Yes
Zfp36l2	ENSMUSG00000045817	-1.10575	5.26902e-32	zinc finger protein 36, C3H type-like 2 [Source:MGI Symbol;Acc:MGI:107945]
Pawr	ENSMUSG00000035873	-2.26749	1.1102e-31	PRKC, apoptosis, WT1, regulator [Source:MGI Symbol;Acc:MGI:2149961]	Yes
Angptl2	ENSMUSG00000004105	1.0173	1.39156e-31	angiopoietin-like 2 [Source:MGI Symbol;Acc:MGI:1347002]
Cables1	ENSMUSG00000040957	2.34575	1.40335e-31	CDK5 and Abl enzyme substrate 1 [Source:MGI Symbol;Acc:MGI:1927065]	Yes
Kitl	ENSMUSG00000019966	-1.66455	1.5014e-31	kit ligand [Source:MGI Symbol;Acc:MGI:96974]	Yes
Rasl10b	ENSMUSG00000020684	2.81554	1.81482e-31	RAS-like, family 10, member B [Source:MGI Symbol;Acc:MGI:2685575]	Yes
Il15ra	ENSMUSG00000023206	1.57496	1.81986e-31	interleukin 15 receptor, alpha chain [Source:MGI Symbol;Acc:MGI:104644]	Yes
Rab9	ENSMUSG00000079316	-0.825909	3.08854e-31	RAB9, member RAS oncogene family [Source:MGI Symbol;Acc:MGI:1890695]
Col3a1	ENSMUSG00000026043	1.42461	3.5017e-31	collagen, type III, alpha 1 [Source:MGI Symbol;Acc:MGI:88453]
Cdr2	ENSMUSG00000030878	1.20644	3.76279e-31	cerebellar degeneration-related 2 [Source:MGI Symbol;Acc:MGI:1100885]
Spp1	ENSMUSG00000029304	-2.1809	4.53142e-31	secreted phosphoprotein 1 [Source:MGI Symbol;Acc:MGI:98389]	Yes
Gnao1	ENSMUSG00000031748	1.08564	8.70645e-31	guanine nucleotide binding protein, alpha O [Source:MGI Symbol;Acc:MGI:95775]
Cyb5r3	ENSMUSG00000018042	-0.835714	1.46315e-30	cytochrome b5 reductase 3 [Source:MGI Symbol;Acc:MGI:94893]
Dzip1	ENSMUSG00000042156	-1.03232	1.52408e-30	DAZ interacting protein 1 [Source:MGI Symbol;Acc:MGI:1914311]
Gprin3	ENSMUSG00000045441	-3.34703	1.53817e-30	GPRIN family member 3 [Source:MGI Symbol;Acc:MGI:1924785]	Yes
Plekha5	ENSMUSG00000030231	0.925362	2.0808e-30	pleckstrin homology domain containing, family A member 5 [Source:MGI Symbol;Acc:MGI:1923802]
Exoc3l4	ENSMUSG00000021280	-1.69229	2.90074e-30	exocyst complex component 3-like 4 [Source:MGI Symbol;Acc:MGI:1921363]	Yes
Masp1	ENSMUSG00000022887	1.9142	3.01234e-30	mannan-binding lectin serine peptidase 1 [Source:MGI Symbol;Acc:MGI:88492]	Yes
Heg1	ENSMUSG00000075254	1.26385	3.4474e-30	heart development protein with EGF-like domains 1 [Source:MGI Symbol;Acc:MGI:1924696]
Tmem26	ENSMUSG00000060044	-2.6083	3.71577e-30	transmembrane protein 26 [Source:MGI Symbol;Acc:MGI:2143537]	Yes
Epb41l3	ENSMUSG00000024044	1.17898	4.66516e-30	erythrocyte membrane protein band 4.1 like 3 [Source:MGI Symbol;Acc:MGI:103008]
St3gal5	ENSMUSG00000056091	1.87186	8.38215e-30	ST3 beta-galactoside alpha-2,3-sialyltransferase 5 [Source:MGI Symbol;Acc:MGI:1339963]	Yes
Cdkn2b	ENSMUSG00000073802	-1.51004	9.37624e-30	cyclin dependent kinase inhibitor 2B [Source:MGI Symbol;Acc:MGI:104737]	Yes
Pltp	ENSMUSG00000017754	-1.61011	1.20965e-29	phospholipid transfer protein [Source:MGI Symbol;Acc:MGI:103151]	Yes
Pdlim1	ENSMUSG00000055044	-1.34474	1.78539e-29	PDZ and LIM domain 1 (elfin) [Source:MGI Symbol;Acc:MGI:1860611]
Cnksr3	ENSMUSG00000015202	-1.86797	2.00754e-29	Cnksr family member 3 [Source:MGI Symbol;Acc:MGI:2674130]	Yes
Crebrf	ENSMUSG00000048249	-0.880176	2.10437e-29	CREB3 regulatory factor [Source:MGI Symbol;Acc:MGI:1924378]
Slc5a3	ENSMUSG00000089774	-1.68633	3.91234e-29	solute carrier family 5 (inositol transporters), member 3 [Source:MGI Symbol;Acc:MGI:1858226]	Yes
Kcnab1	ENSMUSG00000027827	-3.04677	4.86099e-29	potassium voltage-gated channel, shaker-related subfamily, beta member 1 [Source:MGI Symbol;Acc:MGI:109155]	Yes
Gda	ENSMUSG00000058624	1.12535	5.28756e-29	guanine deaminase [Source:MGI Symbol;Acc:MGI:95678]
Myo7a	ENSMUSG00000030761	1.16109	9.34604e-29	myosin VIIA [Source:MGI Symbol;Acc:MGI:104510]
Cryab	ENSMUSG00000032060	-1.67975	1.96161e-28	crystallin, alpha B [Source:MGI Symbol;Acc:MGI:88516]	Yes
Adam33	ENSMUSG00000027318	-2.15246	2.67902e-28	a disintegrin and metallopeptidase domain 33 [Source:MGI Symbol;Acc:MGI:1341813]	Yes
Epha1	ENSMUSG00000029859	-2.5401	2.85893e-28	Eph receptor A1 [Source:MGI Symbol;Acc:MGI:107381]	Yes
Bmp5	ENSMUSG00000032179	1.4946	4.13323e-28	bone morphogenetic protein 5 [Source:MGI Symbol;Acc:MGI:88181]
Mcc	ENSMUSG00000071856	-1.14711	4.57983e-28	mutated in colorectal cancers [Source:MGI Symbol;Acc:MGI:96930]
Fam13c	ENSMUSG00000043259	-1.51647	4.68259e-28	family with sequence similarity 13, member C [Source:MGI Symbol;Acc:MGI:1918971]	Yes
Rcan2	ENSMUSG00000039601	-4.51459	6.59031e-28	regulator of calcineurin 2 [Source:MGI Symbol;Acc:MGI:1858219]	Yes
Cxcl12	ENSMUSG00000061353	-2.06686	7.06645e-28	chemokine (C-X-C motif) ligand 12 [Source:MGI Symbol;Acc:MGI:103556]	Yes
Col4a1	ENSMUSG00000031502	-0.979612	8.30683e-28	collagen, type IV, alpha 1 [Source:MGI Symbol;Acc:MGI:88454]
Gm42528	ENSMUSG00000107134	3.43189	8.51145e-28	predicted gene 42528 [Source:MGI Symbol;Acc:MGI:5662665]	Yes
Srpx2	ENSMUSG00000031253	-1.90753	1.03107e-27	sushi-repeat-containing protein, X-linked 2 [Source:MGI Symbol;Acc:MGI:1916042]	Yes
Cacna1c	ENSMUSG00000051331	1.47704	1.28015e-27	calcium channel, voltage-dependent, L type, alpha 1C subunit [Source:MGI Symbol;Acc:MGI:103013]
C1s1	ENSMUSG00000038521	-1.09195	1.52719e-27	complement component 1, s subcomponent 1 [Source:MGI Symbol;Acc:MGI:1355312]
Il1rap	ENSMUSG00000022514	-1.02112	1.82915e-27	interleukin 1 receptor accessory protein [Source:MGI Symbol;Acc:MGI:104975]
Eya2	ENSMUSG00000017897	1.38994	2.64743e-27	EYA transcriptional coactivator and phosphatase 2 [Source:MGI Symbol;Acc:MGI:109341]
Nhs	ENSMUSG00000059493	-1.05952	3.20748e-27	NHS actin remodeling regulator [Source:MGI Symbol;Acc:MGI:2684894]
Tiparp	ENSMUSG00000034640	1.0742	3.96556e-27	TCDD-inducible poly(ADP-ribose) polymerase [Source:MGI Symbol;Acc:MGI:2159210]
Igf1	ENSMUSG00000020053	2.02971	4.66137e-27	insulin-like growth factor 1 [Source:MGI Symbol;Acc:MGI:96432]	Yes
Fst	ENSMUSG00000021765	-1.60279	5.0454e-27	follistatin [Source:MGI Symbol;Acc:MGI:95586]	Yes
Car13	ENSMUSG00000027555	0.825046	5.72258e-27	carbonic anhydrase 13 [Source:MGI Symbol;Acc:MGI:1931322]
Anxa8	ENSMUSG00000021950	-1.49816	6.70025e-27	annexin A8 [Source:MGI Symbol;Acc:MGI:1201374]
Syt11	ENSMUSG00000068923	0.938144	7.14189e-27	synaptotagmin XI [Source:MGI Symbol;Acc:MGI:1859547]
Pla2r1	ENSMUSG00000054580	-1.60052	8.38112e-27	phospholipase A2 receptor 1 [Source:MGI Symbol;Acc:MGI:102468]	Yes
Angpt4	ENSMUSG00000027460	-2.68282	1.05548e-26	angiopoietin 4 [Source:MGI Symbol;Acc:MGI:1336887]	Yes
Gyg	ENSMUSG00000019528	-1.91038	1.1702e-26	glycogenin [Source:MGI Symbol;Acc:MGI:1351614]	Yes
Cpe	ENSMUSG00000037852	-0.684687	1.36302e-26	carboxypeptidase E [Source:MGI Symbol;Acc:MGI:101932]
Chst2	ENSMUSG00000033350	-1.46841	1.75608e-26	carbohydrate sulfotransferase 2 [Source:MGI Symbol;Acc:MGI:1891160]
Csgalnact1	ENSMUSG00000036356	0.960351	1.78676e-26	chondroitin sulfate N-acetylgalactosaminyltransferase 1 [Source:MGI Symbol;Acc:MGI:2442354]
Aldh1a2	ENSMUSG00000013584	-1.81381	2.17917e-26	aldehyde dehydrogenase family 1, subfamily A2 [Source:MGI Symbol;Acc:MGI:107928]	Yes
Nrxn2	ENSMUSG00000033768	3.04875	2.35223e-26	neurexin II [Source:MGI Symbol;Acc:MGI:1096362]	Yes
Agtr2	ENSMUSG00000068122	2.0804	3.15267e-26	angiotensin II receptor, type 2 [Source:MGI Symbol;Acc:MGI:87966]	Yes
Rgs16	ENSMUSG00000026475	-1.96964	4.02665e-26	regulator of G-protein signaling 16 [Source:MGI Symbol;Acc:MGI:108407]	Yes
Nfatc4	ENSMUSG00000023411	0.830428	5.70961e-26	nuclear factor of activated T cells, cytoplasmic, calcineurin dependent 4 [Source:MGI Symbol;Acc:MGI:1920431]
Dennd4a	ENSMUSG00000053641	-0.940647	6.55192e-26	DENN/MADD domain containing 4A [Source:MGI Symbol;Acc:MGI:2142979]
Hs6st2	ENSMUSG00000062184	-1.39508	6.58282e-26	heparan sulfate 6-O-sulfotransferase 2 [Source:MGI Symbol;Acc:MGI:1354959]
Anxa2	ENSMUSG00000032231	0.766415	6.82301e-26	annexin A2 [Source:MGI Symbol;Acc:MGI:88246]
Lingo1	ENSMUSG00000049556	-1.97132	7.31582e-26	leucine rich repeat and Ig domain containing 1 [Source:MGI Symbol;Acc:MGI:1915522]	Yes
Arhgap42	ENSMUSG00000050730	0.964829	9.30473e-26	Rho GTPase activating protein 42 [Source:MGI Symbol;Acc:MGI:1918794]
Ahnak	ENSMUSG00000069833	-0.948262	9.90527e-26	AHNAK nucleoprotein (desmoyokin) [Source:MGI Symbol;Acc:MGI:1316648]
Ugp2	ENSMUSG00000001891	0.841216	1.06842e-25	UDP-glucose pyrophosphorylase 2 [Source:MGI Symbol;Acc:MGI:2183447]
Enpp2	ENSMUSG00000022425	1.75386	1.11369e-25	ectonucleotide pyrophosphatase/phosphodiesterase 2 [Source:MGI Symbol;Acc:MGI:1321390]	Yes
Gm5763	ENSMUSG00000048600	-2.93579	1.5818e-25	predicted pseudogene 5763 [Source:MGI Symbol;Acc:MGI:3647841]	Yes
Dchs1	ENSMUSG00000036862	1.30702	2.93487e-25	dachsous cadherin related 1 [Source:MGI Symbol;Acc:MGI:2685011]
Eif3e	ENSMUSG00000022336	-0.655238	4.20546e-25	eukaryotic translation initiation factor 3, subunit E [Source:MGI Symbol;Acc:MGI:99257]
Lhfpl2	ENSMUSG00000045312	1.06193	4.29847e-25	lipoma HMGIC fusion partner-like 2 [Source:MGI Symbol;Acc:MGI:2145236]
Ddit4	ENSMUSG00000020108	1.00163	4.85292e-25	DNA-damage-inducible transcript 4 [Source:MGI Symbol;Acc:MGI:1921997]
Ak5	ENSMUSG00000039058	-2.05456	5.91063e-25	adenylate kinase 5 [Source:MGI Symbol;Acc:MGI:2677491]	Yes
Skil	ENSMUSG00000027660	1.62781	6.29957e-25	SKI-like [Source:MGI Symbol;Acc:MGI:106203]	Yes
Zc2hc1a	ENSMUSG00000043542	-1.30276	7.34644e-25	zinc finger, C2HC-type containing 1A [Source:MGI Symbol;Acc:MGI:1914556]
Coq10b	ENSMUSG00000025981	1.00056	7.73081e-25	coenzyme Q10B [Source:MGI Symbol;Acc:MGI:1915126]
Dpysl3	ENSMUSG00000024501	1.35129	7.90555e-25	dihydropyrimidinase-like 3 [Source:MGI Symbol;Acc:MGI:1349762]
Nxph4	ENSMUSG00000040258	1.75826	8.11412e-25	neurexophilin 4 [Source:MGI Symbol;Acc:MGI:1336197]	Yes
Ifit2	ENSMUSG00000045932	-1.81649	9.98345e-25	interferon-induced protein with tetratricopeptide repeats 2 [Source:MGI Symbol;Acc:MGI:99449]	Yes
Nme4	ENSMUSG00000024177	-1.14133	1.03167e-24	NME/NM23 nucleoside diphosphate kinase 4 [Source:MGI Symbol;Acc:MGI:1931148]
Rasl11a	ENSMUSG00000029641	-3.06228	1.03208e-24	RAS-like, family 11, member A [Source:MGI Symbol;Acc:MGI:1916145]	Yes
Rspo2	ENSMUSG00000051920	-2.04715	1.13027e-24	R-spondin 2 [Source:MGI Symbol;Acc:MGI:1922667]	Yes
Ybx3	ENSMUSG00000030189	0.824157	1.45751e-24	Y box protein 3 [Source:MGI Symbol;Acc:MGI:2137670]
Tcea3	ENSMUSG00000001604	-1.01738	1.50906e-24	transcription elongation factor A (SII), 3 [Source:MGI Symbol;Acc:MGI:1196908]
Cd151	ENSMUSG00000025510	0.749188	1.71368e-24	CD151 antigen [Source:MGI Symbol;Acc:MGI:1096360]
Tes	ENSMUSG00000029552	1.22593	1.78621e-24	testin LIM domain protein [Source:MGI Symbol;Acc:MGI:105081]
Fn1	ENSMUSG00000026193	-1.19266	1.81241e-24	fibronectin 1 [Source:MGI Symbol;Acc:MGI:95566]
Aldh6a1	ENSMUSG00000021238	-1.07421	2.11073e-24	aldehyde dehydrogenase family 6, subfamily A1 [Source:MGI Symbol;Acc:MGI:1915077]
Ankrd28	ENSMUSG00000014496	-1.09697	2.13939e-24	ankyrin repeat domain 28 [Source:MGI Symbol;Acc:MGI:2145661]
Hectd2	ENSMUSG00000041180	1.39707	2.14558e-24	HECT domain E3 ubiquitin protein ligase 2 [Source:MGI Symbol;Acc:MGI:2442663]
Dysf	ENSMUSG00000033788	-1.82364	2.68613e-24	dysferlin [Source:MGI Symbol;Acc:MGI:1349385]	Yes
Gcnt4	ENSMUSG00000091387	-2.35267	2.82482e-24	glucosaminyl (N-acetyl) transferase 4, core 2 (beta-1,6-N-acetylglucosaminyltransferase) [Source:MGI Symbol;Acc:MGI:2684919]	Yes
Map3k8	ENSMUSG00000024235	-1.94732	2.93568e-24	mitogen-activated protein kinase kinase kinase 8 [Source:MGI Symbol;Acc:MGI:1346878]	Yes
Hacd4	ENSMUSG00000028497	-1.01875	3.80308e-24	3-hydroxyacyl-CoA dehydratase 4 [Source:MGI Symbol;Acc:MGI:1914025]
Eef1a2	ENSMUSG00000016349	-3.71595	5.17283e-24	eukaryotic translation elongation factor 1 alpha 2 [Source:MGI Symbol;Acc:MGI:1096317]	Yes
Rasl11b	ENSMUSG00000049907	1.47188	6.09295e-24	RAS-like, family 11, member B [Source:MGI Symbol;Acc:MGI:1916189]
Shank1	ENSMUSG00000038738	-1.76446	6.21868e-24	SH3 and multiple ankyrin repeat domains 1 [Source:MGI Symbol;Acc:MGI:3613677]	Yes
Tom1l1	ENSMUSG00000020541	1.73036	6.93561e-24	target of myb1-like 1 (chicken) [Source:MGI Symbol;Acc:MGI:1919193]	Yes
H1f2	ENSMUSG00000036181	1.49475	7.69567e-24	H1.2 linker histone, cluster member [Source:MGI Symbol;Acc:MGI:1931526]
Ppl	ENSMUSG00000039457	-2.28408	7.78111e-24	periplakin [Source:MGI Symbol;Acc:MGI:1194898]	Yes
Rarres1	ENSMUSG00000049404	-1.86447	7.78111e-24	retinoic acid receptor responder (tazarotene induced) 1 [Source:MGI Symbol;Acc:MGI:1924461]	Yes
Sun2	ENSMUSG00000042524	-1.04511	8.71326e-24	Sad1 and UNC84 domain containing 2 [Source:MGI Symbol;Acc:MGI:2443011]
Tns3	ENSMUSG00000020422	-1.00955	9.04805e-24	tensin 3 [Source:MGI Symbol;Acc:MGI:2443012]
Man2b2	ENSMUSG00000029119	-0.739253	1.11639e-23	mannosidase 2, alpha B2 [Source:MGI Symbol;Acc:MGI:1195262]
Fgfr1	ENSMUSG00000031565	1.1086	1.13957e-23	fibroblast growth factor receptor 1 [Source:MGI Symbol;Acc:MGI:95522]
Hspb6	ENSMUSG00000036854	-2.18721	1.1971e-23	heat shock protein, alpha-crystallin-related, B6 [Source:MGI Symbol;Acc:MGI:2685325]	Yes
Rarres2	ENSMUSG00000009281	-1.48843	1.51049e-23	retinoic acid receptor responder (tazarotene induced) 2 [Source:MGI Symbol;Acc:MGI:1918910]
Penk	ENSMUSG00000045573	-6.14837	1.91481e-23	preproenkephalin [Source:MGI Symbol;Acc:MGI:104629]	Yes
Ptchd1	ENSMUSG00000041552	1.41282	1.93476e-23	patched domain containing 1 [Source:MGI Symbol;Acc:MGI:2685233]
Arl4c	ENSMUSG00000049866	1.69966	2.53948e-23	ADP-ribosylation factor-like 4C [Source:MGI Symbol;Acc:MGI:2445172]	Yes
Tmem200a	ENSMUSG00000049420	-1.58673	3.17215e-23	transmembrane protein 200A [Source:MGI Symbol;Acc:MGI:1924470]	Yes
Pde7b	ENSMUSG00000019990	1.34021	3.70387e-23	phosphodiesterase 7B [Source:MGI Symbol;Acc:MGI:1352752]
Fut8	ENSMUSG00000021065	0.924908	4.30854e-23	fucosyltransferase 8 [Source:MGI Symbol;Acc:MGI:1858901]
Rbms3	ENSMUSG00000039607	0.984102	4.89514e-23	RNA binding motif, single stranded interacting protein [Source:MGI Symbol;Acc:MGI:2444477]
Plcb1	ENSMUSG00000051177	1.65487	5.34989e-23	phospholipase C, beta 1 [Source:MGI Symbol;Acc:MGI:97613]	Yes
Malrd1	ENSMUSG00000075520	-1.74032	7.73025e-23	MAM and LDL receptor class A domain containing 1 [Source:MGI Symbol;Acc:MGI:1928271]	Yes
Ldlrad4	ENSMUSG00000024544	0.976138	8.71969e-23	low density lipoprotein receptor class A domain containing 4 [Source:MGI Symbol;Acc:MGI:1277150]
Abi3bp	ENSMUSG00000035258	-1.62197	1.14488e-22	ABI family member 3 binding protein [Source:MGI Symbol;Acc:MGI:2444583]	Yes
Cdr2l	ENSMUSG00000050910	1.14376	1.20152e-22	cerebellar degeneration-related protein 2-like [Source:MGI Symbol;Acc:MGI:2684867]
Syne3	ENSMUSG00000054150	-1.60371	1.28956e-22	spectrin repeat containing, nuclear envelope family member 3 [Source:MGI Symbol;Acc:MGI:2442408]	Yes
Cd36	ENSMUSG00000002944	-1.76995	1.32903e-22	CD36 molecule [Source:MGI Symbol;Acc:MGI:107899]	Yes
Rgs17	ENSMUSG00000019775	-1.4309	1.73476e-22	regulator of G-protein signaling 17 [Source:MGI Symbol;Acc:MGI:1927469]
Loxl2	ENSMUSG00000034205	1.28605	1.75007e-22	lysyl oxidase-like 2 [Source:MGI Symbol;Acc:MGI:2137913]
Hltf	ENSMUSG00000002428	-0.798959	1.93304e-22	helicase-like transcription factor [Source:MGI Symbol;Acc:MGI:1196437]
Sorbs1	ENSMUSG00000025006	-1.21224	2.04652e-22	sorbin and SH3 domain containing 1 [Source:MGI Symbol;Acc:MGI:700014]
Rab29	ENSMUSG00000026433	-1.06258	2.0822e-22	RAB29, member RAS oncogene family [Source:MGI Symbol;Acc:MGI:2385107]
Sh2d4a	ENSMUSG00000053886	-3.00337	2.16471e-22	SH2 domain containing 4A [Source:MGI Symbol;Acc:MGI:1919531]	Yes
Fmnl3	ENSMUSG00000023008	-0.854773	2.68064e-22	formin-like 3 [Source:MGI Symbol;Acc:MGI:109569]
Tmem86a	ENSMUSG00000010307	0.93779	2.75137e-22	transmembrane protein 86A [Source:MGI Symbol;Acc:MGI:1915143]
Avpi1	ENSMUSG00000018821	1.24234	3.73503e-22	arginine vasopressin-induced 1 [Source:MGI Symbol;Acc:MGI:1916784]
Cd24a	ENSMUSG00000047139	1.88725	3.8985e-22	CD24a antigen [Source:MGI Symbol;Acc:MGI:88323]	Yes
Reck	ENSMUSG00000028476	-1.08158	4.21947e-22	reversion-inducing-cysteine-rich protein with kazal motifs [Source:MGI Symbol;Acc:MGI:1855698]
Zfp36l1	ENSMUSG00000021127	1.09069	4.35207e-22	zinc finger protein 36, C3H type-like 1 [Source:MGI Symbol;Acc:MGI:107946]
Adamts2	ENSMUSG00000036545	1.09173	4.35207e-22	a disintegrin-like and metallopeptidase (reprolysin type) with thrombospondin type 1 motif, 2 [Source:MGI Symbol;Acc:MGI:1347356]
Usp46	ENSMUSG00000054814	0.931549	4.48082e-22	ubiquitin specific peptidase 46 [Source:MGI Symbol;Acc:MGI:1916977]
Mamld1	ENSMUSG00000059401	-1.78698	4.80095e-22	mastermind-like domain containing 1 [Source:MGI Symbol;Acc:MGI:3045303]	Yes
Wwtr1	ENSMUSG00000027803	0.707386	6.58408e-22	WW domain containing transcription regulator 1 [Source:MGI Symbol;Acc:MGI:1917649]
Sh3rf3	ENSMUSG00000037990	-1.47599	6.79319e-22	SH3 domain containing ring finger 3 [Source:MGI Symbol;Acc:MGI:2444637]
Fat1	ENSMUSG00000070047	-0.92481	9.31103e-22	FAT atypical cadherin 1 [Source:MGI Symbol;Acc:MGI:109168]
Mmp2	ENSMUSG00000031740	1.20399	9.5982e-22	matrix metallopeptidase 2 [Source:MGI Symbol;Acc:MGI:97009]
Shisal1	ENSMUSG00000062760	4.82137	9.75812e-22	shisa like 1 [Source:MGI Symbol;Acc:MGI:1919551]	Yes
Chrdl2	ENSMUSG00000030732	9.35435	1.0082e-21	chordin-like 2 [Source:MGI Symbol;Acc:MGI:1916371]	Yes
Cavin2	ENSMUSG00000045954	-1.25068	1.31786e-21	caveolae associated 2 [Source:MGI Symbol;Acc:MGI:99513]
Tmsb10	ENSMUSG00000079523	0.645286	1.32572e-21	thymosin, beta 10 [Source:MGI Symbol;Acc:MGI:109146]
A830082K12Rik	ENSMUSG00000087143	2.16381	1.46599e-21	RIKEN cDNA A830082K12 gene [Source:MGI Symbol;Acc:MGI:2443527]	Yes
Evc	ENSMUSG00000029122	-0.773158	1.63999e-21	EvC ciliary complex subunit 1 [Source:MGI Symbol;Acc:MGI:1890596]
Gpr176	ENSMUSG00000040133	-3.72491	1.9463e-21	G protein-coupled receptor 176 [Source:MGI Symbol;Acc:MGI:2685858]	Yes
Nxn	ENSMUSG00000020844	1.16675	2.15046e-21	nucleoredoxin [Source:MGI Symbol;Acc:MGI:109331]
Htra4	ENSMUSG00000037406	3.73856	2.26909e-21	HtrA serine peptidase 4 [Source:MGI Symbol;Acc:MGI:3036260]	Yes
Gpr27	ENSMUSG00000072875	1.75947	4.77015e-21	G protein-coupled receptor 27 [Source:MGI Symbol;Acc:MGI:1202299]	Yes
Adamts4	ENSMUSG00000006403	1.78344	4.89967e-21	a disintegrin-like and metallopeptidase (reprolysin type) with thrombospondin type 1 motif, 4 [Source:MGI Symbol;Acc:MGI:1339949]	Yes
Khk	ENSMUSG00000029162	-1.57976	5.37306e-21	ketohexokinase [Source:MGI Symbol;Acc:MGI:1096353]	Yes
Gm29233	ENSMUSG00000101859	-3.16138	5.4823e-21	predicted gene 29233 [Source:MGI Symbol;Acc:MGI:5579939]	Yes
Ptgfr	ENSMUSG00000028036	1.55756	6.27908e-21	prostaglandin F receptor [Source:MGI Symbol;Acc:MGI:97796]	Yes
Pcsk6	ENSMUSG00000030513	-1.66516	6.48503e-21	proprotein convertase subtilisin/kexin type 6 [Source:MGI Symbol;Acc:MGI:102897]	Yes
Tnfsf11	ENSMUSG00000022015	2.30344	6.74962e-21	tumor necrosis factor (ligand) superfamily, member 11 [Source:MGI Symbol;Acc:MGI:1100089]	Yes
Npr2	ENSMUSG00000028469	-0.685184	6.74962e-21	natriuretic peptide receptor 2 [Source:MGI Symbol;Acc:MGI:97372]
Spon1	ENSMUSG00000038156	1.58655	7.02389e-21	spondin 1, (f-spondin) extracellular matrix protein [Source:MGI Symbol;Acc:MGI:2385287]	Yes
Nckap5	ENSMUSG00000049690	-2.28395	7.11925e-21	NCK-associated protein 5 [Source:MGI Symbol;Acc:MGI:2686394]	Yes
Evc2	ENSMUSG00000050248	-0.770136	9.21038e-21	EvC ciliary complex subunit 2 [Source:MGI Symbol;Acc:MGI:1915775]
Filip1l	ENSMUSG00000043336	1.93384	1.02939e-20	filamin A interacting protein 1-like [Source:MGI Symbol;Acc:MGI:1925999]	Yes
Nr2f1	ENSMUSG00000069171	1.88495	1.30509e-20	nuclear receptor subfamily 2, group F, member 1 [Source:MGI Symbol;Acc:MGI:1352451]	Yes
2900026A02Rik	ENSMUSG00000051339	-1.16153	1.41949e-20	RIKEN cDNA 2900026A02 gene [Source:MGI Symbol;Acc:MGI:1920194]
Glis3	ENSMUSG00000052942	-1.27543	1.54451e-20	GLIS family zinc finger 3 [Source:MGI Symbol;Acc:MGI:2444289]
Camkk2	ENSMUSG00000029471	-0.728382	2.18788e-20	calcium/calmodulin-dependent protein kinase kinase 2, beta [Source:MGI Symbol;Acc:MGI:2444812]
Appl2	ENSMUSG00000020263	-0.920712	2.64772e-20	adaptor protein, phosphotyrosine interaction, PH domain and leucine zipper containing 2 [Source:MGI Symbol;Acc:MGI:2384914]
Tnfaip6	ENSMUSG00000053475	1.71072	2.65625e-20	tumor necrosis factor alpha induced protein 6 [Source:MGI Symbol;Acc:MGI:1195266]	Yes
Aplp2	ENSMUSG00000031996	-1.08918	2.92566e-20	amyloid beta (A4) precursor-like protein 2 [Source:MGI Symbol;Acc:MGI:88047]
Cavin1	ENSMUSG00000004044	-0.990183	3.13223e-20	caveolae associated 1 [Source:MGI Symbol;Acc:MGI:1277968]
Pitpnc1	ENSMUSG00000040430	1.01271	3.36642e-20	phosphatidylinositol transfer protein, cytoplasmic 1 [Source:MGI Symbol;Acc:MGI:1919045]
Cxcl13	ENSMUSG00000023078	6.62959	4.49049e-20	chemokine (C-X-C motif) ligand 13 [Source:MGI Symbol;Acc:MGI:1888499]	Yes
Usp53	ENSMUSG00000039701	1.28148	4.90128e-20	ubiquitin specific peptidase 53 [Source:MGI Symbol;Acc:MGI:2139607]
Adh7	ENSMUSG00000055301	-1.50447	5.31911e-20	alcohol dehydrogenase 7 (class IV), mu or sigma polypeptide [Source:MGI Symbol;Acc:MGI:87926]	Yes
Mbnl1	ENSMUSG00000027763	-0.90606	6.35624e-20	muscleblind like splicing factor 1 [Source:MGI Symbol;Acc:MGI:1928482]
Fabp3	ENSMUSG00000028773	-2.13972	7.34083e-20	fatty acid binding protein 3, muscle and heart [Source:MGI Symbol;Acc:MGI:95476]	Yes
Tm4sf1	ENSMUSG00000027800	1.44335	8.02267e-20	transmembrane 4 superfamily member 1 [Source:MGI Symbol;Acc:MGI:104678]
Dock9	ENSMUSG00000025558	0.981348	9.04306e-20	dedicator of cytokinesis 9 [Source:MGI Symbol;Acc:MGI:106321]
Mknk2	ENSMUSG00000020190	0.803042	9.87987e-20	MAP kinase-interacting serine/threonine kinase 2 [Source:MGI Symbol;Acc:MGI:894279]
Dgkb	ENSMUSG00000036095	5.59877	9.87987e-20	diacylglycerol kinase, beta [Source:MGI Symbol;Acc:MGI:2442474]	Yes
Wdr86	ENSMUSG00000055235	-3.946	9.96064e-20	WD repeat domain 86 [Source:MGI Symbol;Acc:MGI:1915466]	Yes
Nuak2	ENSMUSG00000009772	-1.21327	1.10637e-19	NUAK family, SNF1-like kinase, 2 [Source:MGI Symbol;Acc:MGI:1921387]
Pdk4	ENSMUSG00000019577	-1.79689	1.24254e-19	pyruvate dehydrogenase kinase, isoenzyme 4 [Source:MGI Symbol;Acc:MGI:1351481]	Yes
Agtr1a	ENSMUSG00000049115	-1.94578	1.24972e-19	angiotensin II receptor, type 1a [Source:MGI Symbol;Acc:MGI:87964]	Yes
Xpnpep1	ENSMUSG00000025027	0.932165	1.29501e-19	X-prolyl aminopeptidase (aminopeptidase P) 1, soluble [Source:MGI Symbol;Acc:MGI:2180003]
Pde8a	ENSMUSG00000025584	0.847683	1.30409e-19	phosphodiesterase 8A [Source:MGI Symbol;Acc:MGI:1277116]
Angptl7	ENSMUSG00000028989	-1.37492	1.46718e-19	angiopoietin-like 7 [Source:MGI Symbol;Acc:MGI:3605801]
Cys1	ENSMUSG00000062563	-1.69218	1.80409e-19	cystin 1 [Source:MGI Symbol;Acc:MGI:2177632]	Yes
Egr3	ENSMUSG00000033730	-2.71019	1.86857e-19	early growth response 3 [Source:MGI Symbol;Acc:MGI:1306780]	Yes
Nrcam	ENSMUSG00000020598	1.92887	1.87289e-19	neuronal cell adhesion molecule [Source:MGI Symbol;Acc:MGI:104750]	Yes
Meox1	ENSMUSG00000001493	-2.11288	1.91827e-19	mesenchyme homeobox 1 [Source:MGI Symbol;Acc:MGI:103220]	Yes
Spink8	ENSMUSG00000050074	4.30155	1.91827e-19	serine peptidase inhibitor, Kazal type 8 [Source:MGI Symbol;Acc:MGI:1925959]	Yes
Pbx1	ENSMUSG00000052534	0.817892	1.93429e-19	pre B cell leukemia homeobox 1 [Source:MGI Symbol;Acc:MGI:97495]
Apln	ENSMUSG00000037010	-2.22989	1.97572e-19	apelin [Source:MGI Symbol;Acc:MGI:1353624]	Yes
Stc1	ENSMUSG00000014813	1.38606	2.18823e-19	stanniocalcin 1 [Source:MGI Symbol;Acc:MGI:109131]
Cbx7	ENSMUSG00000053411	-1.7749	2.33305e-19	chromobox 7 [Source:MGI Symbol;Acc:MGI:1196439]	Yes
Ppp1r2	ENSMUSG00000047714	1.14689	2.64654e-19	protein phosphatase 1, regulatory inhibitor subunit 2 [Source:MGI Symbol;Acc:MGI:1914099]
9930012K11Rik	ENSMUSG00000044551	-1.93014	2.87873e-19	RIKEN cDNA 9930012K11 gene [Source:MGI Symbol;Acc:MGI:2145726]	Yes
Gm16062	ENSMUSG00000087249	2.36707	2.91934e-19	predicted gene 16062 [Source:MGI Symbol;Acc:MGI:3802162]	Yes
Cycs	ENSMUSG00000063694	0.771768	2.9454e-19	cytochrome c, somatic [Source:MGI Symbol;Acc:MGI:88578]
Pdzrn4	ENSMUSG00000036218	1.95368	3.01976e-19	PDZ domain containing RING finger 4 [Source:MGI Symbol;Acc:MGI:3056996]	Yes
Tmem167	ENSMUSG00000012422	0.673814	3.07757e-19	transmembrane protein 167 [Source:MGI Symbol;Acc:MGI:1913324]
Cpz	ENSMUSG00000036596	-1.43043	3.3367e-19	carboxypeptidase Z [Source:MGI Symbol;Acc:MGI:88487]
Pdlim2	ENSMUSG00000022090	-1.09867	3.39981e-19	PDZ and LIM domain 2 [Source:MGI Symbol;Acc:MGI:2384850]
Has1	ENSMUSG00000003665	5.0658	3.42259e-19	hyaluronan synthase 1 [Source:MGI Symbol;Acc:MGI:106590]	Yes
Raly	ENSMUSG00000027593	0.665992	3.5812e-19	hnRNP-associated with lethal yellow [Source:MGI Symbol;Acc:MGI:97850]
Igfbp3	ENSMUSG00000020427	1.39162	3.64076e-19	insulin-like growth factor binding protein 3 [Source:MGI Symbol;Acc:MGI:96438]
Hspb2	ENSMUSG00000038086	-2.49758	3.76802e-19	heat shock protein 2 [Source:MGI Symbol;Acc:MGI:1916503]	Yes
Trim7	ENSMUSG00000040350	-1.50472	3.89129e-19	tripartite motif-containing 7 [Source:MGI Symbol;Acc:MGI:2137353]	Yes
Rpgrip1l	ENSMUSG00000033282	-1.09606	3.91575e-19	Rpgrip1-like [Source:MGI Symbol;Acc:MGI:1920563]
Serpina3g	ENSMUSG00000041481	-4.20579	4.92376e-19	serine (or cysteine) peptidase inhibitor, clade A, member 3G [Source:MGI Symbol;Acc:MGI:105046]	Yes
Cpb1	ENSMUSG00000011463	-2.83311	5.17695e-19	carboxypeptidase B1 (tissue) [Source:MGI Symbol;Acc:MGI:1923953]	Yes
Hfe	ENSMUSG00000006611	0.867415	5.40784e-19	homeostatic iron regulator [Source:MGI Symbol;Acc:MGI:109191]
Scarb2	ENSMUSG00000029426	0.780651	5.69597e-19	scavenger receptor class B, member 2 [Source:MGI Symbol;Acc:MGI:1196458]
Smtn	ENSMUSG00000020439	-1.15118	7.2714e-19	smoothelin [Source:MGI Symbol;Acc:MGI:1354727]
Cpt1a	ENSMUSG00000024900	0.944585	7.6393e-19	carnitine palmitoyltransferase 1a, liver [Source:MGI Symbol;Acc:MGI:1098296]
Ebf1	ENSMUSG00000057098	-0.913769	7.99042e-19	early B cell factor 1 [Source:MGI Symbol;Acc:MGI:95275]
Mrc2	ENSMUSG00000020695	0.813369	8.02234e-19	mannose receptor, C type 2 [Source:MGI Symbol;Acc:MGI:107818]
Fcgr3	ENSMUSG00000059498	-1.65075	8.0752e-19	Fc receptor, IgG, low affinity III [Source:MGI Symbol;Acc:MGI:95500]	Yes
Vegfb	ENSMUSG00000024962	-0.958566	8.49391e-19	vascular endothelial growth factor B [Source:MGI Symbol;Acc:MGI:106199]
Dbi	ENSMUSG00000026385	-0.622751	8.69819e-19	diazepam binding inhibitor [Source:MGI Symbol;Acc:MGI:94865]
Syne1	ENSMUSG00000096054	0.94847	8.96026e-19	spectrin repeat containing, nuclear envelope 1 [Source:MGI Symbol;Acc:MGI:1927152]
Pkdcc	ENSMUSG00000024247	0.970412	8.99508e-19	protein kinase domain containing, cytoplasmic [Source:MGI Symbol;Acc:MGI:2147077]
Cited2	ENSMUSG00000039910	-1.42525	1.041e-18	Cbp/p300-interacting transactivator, with Glu/Asp-rich carboxy-terminal domain, 2 [Source:MGI Symbol;Acc:MGI:1306784]
Hp	ENSMUSG00000031722	-3.07415	1.07194e-18	haptoglobin [Source:MGI Symbol;Acc:MGI:96211]	Yes
Kcna4	ENSMUSG00000042604	1.796	1.21687e-18	potassium voltage-gated channel, shaker-related subfamily, member 4 [Source:MGI Symbol;Acc:MGI:96661]	Yes
Fhod3	ENSMUSG00000034295	2.3861	1.26528e-18	formin homology 2 domain containing 3 [Source:MGI Symbol;Acc:MGI:1925847]	Yes
Sytl2	ENSMUSG00000030616	-1.34828	1.29914e-18	synaptotagmin-like 2 [Source:MGI Symbol;Acc:MGI:1933366]
Bdkrb1	ENSMUSG00000041347	2.82543	1.30911e-18	bradykinin receptor, beta 1 [Source:MGI Symbol;Acc:MGI:88144]	Yes
Itprid2	ENSMUSG00000027007	-1.12463	1.58108e-18	ITPR interacting domain containing 2 [Source:MGI Symbol;Acc:MGI:1917849]
Smim3	ENSMUSG00000038059	1.62466	1.63862e-18	small integral membrane protein 3 [Source:MGI Symbol;Acc:MGI:1917088]	Yes
Plpp1	ENSMUSG00000021759	-0.715664	2.21486e-18	phospholipid phosphatase 1 [Source:MGI Symbol;Acc:MGI:108412]
3300005D01Rik	ENSMUSG00000096965	-1.63995	2.25638e-18	RIKEN cDNA 3300005D01 gene [Source:MGI Symbol;Acc:MGI:1925762]	Yes
Ctdsp2	ENSMUSG00000078429	-0.611484	2.32083e-18	CTD (carboxy-terminal domain, RNA polymerase II, polypeptide A) small phosphatase 2 [Source:MGI Symbol;Acc:MGI:1098748]
Lama5	ENSMUSG00000015647	-3.14786	2.62207e-18	laminin, alpha 5 [Source:MGI Symbol;Acc:MGI:105382]	Yes
Galk2	ENSMUSG00000027207	-0.62287	3.00555e-18	galactokinase 2 [Source:MGI Symbol;Acc:MGI:1917226]
Ptgs1	ENSMUSG00000047250	-1.31643	3.0986e-18	prostaglandin-endoperoxide synthase 1 [Source:MGI Symbol;Acc:MGI:97797]
Thbs1	ENSMUSG00000040152	-3.14617	3.4552e-18	thrombospondin 1 [Source:MGI Symbol;Acc:MGI:98737]	Yes
Tbl1xr1	ENSMUSG00000027630	-0.71106	3.82704e-18	transducin (beta)-like 1X-linked receptor 1 [Source:MGI Symbol;Acc:MGI:2441730]
Tmem159	ENSMUSG00000030917	-0.765858	4.06876e-18	transmembrane protein 159 [Source:MGI Symbol;Acc:MGI:1925752]
Sema3b	ENSMUSG00000057969	-1.14826	4.47666e-18	sema domain, immunoglobulin domain (Ig), short basic domain, secreted, (semaphorin) 3B [Source:MGI Symbol;Acc:MGI:107561]
Mettl27	ENSMUSG00000040557	-1.12535	4.52692e-18	methyltransferase like 27 [Source:MGI Symbol;Acc:MGI:1933146]
Csrp1	ENSMUSG00000026421	0.780471	5.2208e-18	cysteine and glycine-rich protein 1 [Source:MGI Symbol;Acc:MGI:88549]
Map4k3	ENSMUSG00000024242	-1.08059	5.54074e-18	mitogen-activated protein kinase kinase kinase kinase 3 [Source:MGI Symbol;Acc:MGI:2154405]
Hps3	ENSMUSG00000027615	-1.18984	6.78196e-18	HPS3, biogenesis of lysosomal organelles complex 2 subunit 1 [Source:MGI Symbol;Acc:MGI:2153839]
Plekha4	ENSMUSG00000040428	-2.04239	7.06799e-18	pleckstrin homology domain containing, family A (phosphoinositide binding specific) member 4 [Source:MGI Symbol;Acc:MGI:1916467]	Yes
Abcc5	ENSMUSG00000022822	-1.02424	7.5955e-18	ATP-binding cassette, sub-family C (CFTR/MRP), member 5 [Source:MGI Symbol;Acc:MGI:1351644]
Ablim1	ENSMUSG00000025085	-0.733491	8.97253e-18	actin-binding LIM protein 1 [Source:MGI Symbol;Acc:MGI:1194500]
Pparg	ENSMUSG00000000440	-1.99228	9.43576e-18	peroxisome proliferator activated receptor gamma [Source:MGI Symbol;Acc:MGI:97747]	Yes
Selenbp1	ENSMUSG00000068874	-1.5078	9.43705e-18	selenium binding protein 1 [Source:MGI Symbol;Acc:MGI:96825]	Yes
Enpp1	ENSMUSG00000037370	0.93259	9.61843e-18	ectonucleotide pyrophosphatase/phosphodiesterase 1 [Source:MGI Symbol;Acc:MGI:97370]
Dusp1	ENSMUSG00000024190	1.29903	9.95616e-18	dual specificity phosphatase 1 [Source:MGI Symbol;Acc:MGI:105120]
Vegfd	ENSMUSG00000031380	-3.07147	9.95616e-18	vascular endothelial growth factor D [Source:MGI Symbol;Acc:MGI:108037]	Yes
Gask1a	ENSMUSG00000038233	1.34466	1.13145e-17	golgi associated kinase 1A [Source:MGI Symbol;Acc:MGI:3041196]
Dusp8	ENSMUSG00000037887	2.33337	1.22145e-17	dual specificity phosphatase 8 [Source:MGI Symbol;Acc:MGI:106626]	Yes
Emc2	ENSMUSG00000022337	-0.645245	1.49616e-17	ER membrane protein complex subunit 2 [Source:MGI Symbol;Acc:MGI:1913986]
Atp1a1	ENSMUSG00000033161	0.929452	1.62035e-17	ATPase, Na+/K+ transporting, alpha 1 polypeptide [Source:MGI Symbol;Acc:MGI:88105]
Sik2	ENSMUSG00000037112	0.739278	1.90944e-17	salt inducible kinase 2 [Source:MGI Symbol;Acc:MGI:2445031]
Adh1	ENSMUSG00000074207	-2.00606	1.94578e-17	alcohol dehydrogenase 1 (class I) [Source:MGI Symbol;Acc:MGI:87921]	Yes
Gdf11	ENSMUSG00000025352	0.757546	2.05479e-17	growth differentiation factor 11 [Source:MGI Symbol;Acc:MGI:1338027]
Gstm1	ENSMUSG00000058135	-0.805824	2.76275e-17	glutathione S-transferase, mu 1 [Source:MGI Symbol;Acc:MGI:95860]
Fam131b	ENSMUSG00000029861	-1.57258	2.89606e-17	family with sequence similarity 131, member B [Source:MGI Symbol;Acc:MGI:1923406]	Yes
P4ha3	ENSMUSG00000051048	0.875566	4.18534e-17	procollagen-proline, 2-oxoglutarate 4-dioxygenase (proline 4-hydroxylase), alpha polypeptide III [Source:MGI Symbol;Acc:MGI:2444049]
Psrc1	ENSMUSG00000068744	-0.71939	4.18771e-17	proline/serine-rich coiled-coil 1 [Source:MGI Symbol;Acc:MGI:1913099]
Phf11d	ENSMUSG00000068245	-2.24821	5.35849e-17	PHD finger protein 11D [Source:MGI Symbol;Acc:MGI:1277133]	Yes
Lpar1	ENSMUSG00000038668	0.545976	5.40298e-17	lysophosphatidic acid receptor 1 [Source:MGI Symbol;Acc:MGI:108429]
Phactr2	ENSMUSG00000062866	-0.847834	6.07469e-17	phosphatase and actin regulator 2 [Source:MGI Symbol;Acc:MGI:2446138]
Rab23	ENSMUSG00000004768	0.958955	6.5594e-17	RAB23, member RAS oncogene family [Source:MGI Symbol;Acc:MGI:99833]
Ppme1	ENSMUSG00000030718	0.987334	7.59621e-17	protein phosphatase methylesterase 1 [Source:MGI Symbol;Acc:MGI:1919840]
Fam102b	ENSMUSG00000040339	-1.03249	8.04887e-17	family with sequence similarity 102, member B [Source:MGI Symbol;Acc:MGI:3036259]
Wnt9a	ENSMUSG00000000126	1.53012	8.54315e-17	wingless-type MMTV integration site family, member 9A [Source:MGI Symbol;Acc:MGI:2446084]	Yes
Celf2	ENSMUSG00000002107	-1.25702	9.02567e-17	CUGBP, Elav-like family member 2 [Source:MGI Symbol;Acc:MGI:1338822]
Tnfrsf9	ENSMUSG00000028965	3.16278	9.91819e-17	tumor necrosis factor receptor superfamily, member 9 [Source:MGI Symbol;Acc:MGI:1101059]	Yes
Klf3	ENSMUSG00000029178	-0.735305	1.11248e-16	Kruppel-like factor 3 (basic) [Source:MGI Symbol;Acc:MGI:1342773]
P3h4	ENSMUSG00000006931	0.597436	1.30155e-16	prolyl 3-hydroxylase family member 4 (non-enzymatic) [Source:MGI Symbol;Acc:MGI:1913430]
Col28a1	ENSMUSG00000068794	-2.69037	1.34368e-16	collagen, type XXVIII, alpha 1 [Source:MGI Symbol;Acc:MGI:2685312]	Yes
Cplx2	ENSMUSG00000025867	-1.7327	1.37957e-16	complexin 2 [Source:MGI Symbol;Acc:MGI:104726]	Yes
Prps2	ENSMUSG00000025742	-0.773037	1.4259e-16	phosphoribosyl pyrophosphate synthetase 2 [Source:MGI Symbol;Acc:MGI:97776]
Hcn1	ENSMUSG00000021730	2.80031	1.5294e-16	hyperpolarization activated cyclic nucleotide gated potassium channel 1 [Source:MGI Symbol;Acc:MGI:1096392]	Yes
Hsd17b7	ENSMUSG00000026675	0.980315	1.57156e-16	hydroxysteroid (17-beta) dehydrogenase 7 [Source:MGI Symbol;Acc:MGI:1330808]
Dcaf4	ENSMUSG00000021222	-0.792088	1.57194e-16	DDB1 and CUL4 associated factor 4 [Source:MGI Symbol;Acc:MGI:1921078]
Fto	ENSMUSG00000055932	-0.678997	1.62178e-16	fat mass and obesity associated [Source:MGI Symbol;Acc:MGI:1347093]
Klf15	ENSMUSG00000030087	-1.47776	1.70068e-16	Kruppel-like factor 15 [Source:MGI Symbol;Acc:MGI:1929988]
Adamts5	ENSMUSG00000022894	-0.914876	1.72603e-16	a disintegrin-like and metallopeptidase (reprolysin type) with thrombospondin type 1 motif, 5 (aggrecanase-2) [Source:MGI Symbol;Acc:MGI:1346321]
Hsf2	ENSMUSG00000019878	1.06419	1.86273e-16	heat shock factor 2 [Source:MGI Symbol;Acc:MGI:96239]
H2-Q4	ENSMUSG00000035929	-1.72474	1.88289e-16	histocompatibility 2, Q region locus 4 [Source:MGI Symbol;Acc:MGI:95933]	Yes
Plekhg1	ENSMUSG00000040624	1.24145	1.97747e-16	pleckstrin homology domain containing, family G (with RhoGef domain) member 1 [Source:MGI Symbol;Acc:MGI:2676551]
Ppp1r3b	ENSMUSG00000046794	-1.25628	2.12001e-16	protein phosphatase 1, regulatory subunit 3B [Source:MGI Symbol;Acc:MGI:2177268]
Lrch1	ENSMUSG00000068015	-1.29093	2.31959e-16	leucine-rich repeats and calponin homology (CH) domain containing 1 [Source:MGI Symbol;Acc:MGI:2443390]
Avpr1a	ENSMUSG00000020123	-3.26342	2.44239e-16	arginine vasopressin receptor 1A [Source:MGI Symbol;Acc:MGI:1859216]	Yes
Camp	ENSMUSG00000038357	2.39231	2.64147e-16	cathelicidin antimicrobial peptide [Source:MGI Symbol;Acc:MGI:108443]	Yes
Ank2	ENSMUSG00000032826	-1.09475	2.68712e-16	ankyrin 2, brain [Source:MGI Symbol;Acc:MGI:88025]
Eif4b	ENSMUSG00000058655	-0.581336	3.13074e-16	eukaryotic translation initiation factor 4B [Source:MGI Symbol;Acc:MGI:95304]
Has2	ENSMUSG00000022367	1.17454	3.22802e-16	hyaluronan synthase 2 [Source:MGI Symbol;Acc:MGI:107821]
Rdh10	ENSMUSG00000025921	1.52148	3.45754e-16	retinol dehydrogenase 10 (all-trans) [Source:MGI Symbol;Acc:MGI:1924238]	Yes
Mrps6	ENSMUSG00000039680	-1.01398	3.86646e-16	mitochondrial ribosomal protein S6 [Source:MGI Symbol;Acc:MGI:2153111]
Col23a1	ENSMUSG00000063564	-1.86192	3.91266e-16	collagen, type XXIII, alpha 1 [Source:MGI Symbol;Acc:MGI:2653243]	Yes
Ism1	ENSMUSG00000074766	-0.883874	3.93537e-16	isthmin 1, angiogenesis inhibitor [Source:MGI Symbol;Acc:MGI:2442963]
Eif4e3	ENSMUSG00000093661	1.66507	4.10281e-16	eukaryotic translation initiation factor 4E member 3 [Source:MGI Symbol;Acc:MGI:1914142]	Yes
Gprasp2	ENSMUSG00000072966	-1.61648	4.18536e-16	G protein-coupled receptor associated sorting protein 2 [Source:MGI Symbol;Acc:MGI:2442071]	Yes
Perp	ENSMUSG00000019851	-1.94136	4.4213e-16	PERP, TP53 apoptosis effector [Source:MGI Symbol;Acc:MGI:1929938]	Yes
Ripor3	ENSMUSG00000074577	-2.59814	4.4213e-16	RIPOR family member 3 [Source:MGI Symbol;Acc:MGI:1916803]	Yes
Ksr1	ENSMUSG00000018334	1.0348	4.58584e-16	kinase suppressor of ras 1 [Source:MGI Symbol;Acc:MGI:105051]
Egfl6	ENSMUSG00000000402	-1.19676	4.78463e-16	EGF-like-domain, multiple 6 [Source:MGI Symbol;Acc:MGI:1858599]
Adam5	ENSMUSG00000031554	-1.12178	5.29302e-16	a disintegrin and metallopeptidase domain 5 [Source:MGI Symbol;Acc:MGI:104730]
Hmgn3	ENSMUSG00000066456	-0.832057	6.27159e-16	high mobility group nucleosomal binding domain 3 [Source:MGI Symbol;Acc:MGI:2138069]
Phf1	ENSMUSG00000024193	-0.744976	6.50315e-16	PHD finger protein 1 [Source:MGI Symbol;Acc:MGI:98647]
C1rb	ENSMUSG00000098470	-1.4864	6.67783e-16	complement component 1, r subcomponent B [Source:MGI Symbol;Acc:MGI:3779804]
Traf4	ENSMUSG00000017386	0.757418	6.74848e-16	TNF receptor associated factor 4 [Source:MGI Symbol;Acc:MGI:1202880]
Runx2	ENSMUSG00000039153	-1.1877	6.85304e-16	runt related transcription factor 2 [Source:MGI Symbol;Acc:MGI:99829]
Gaa	ENSMUSG00000025579	-0.498966	7.39467e-16	glucosidase, alpha, acid [Source:MGI Symbol;Acc:MGI:95609]
B2m	ENSMUSG00000060802	-0.959772	7.60023e-16	beta-2 microglobulin [Source:MGI Symbol;Acc:MGI:88127]
Myo1b	ENSMUSG00000018417	0.729754	7.61697e-16	myosin IB [Source:MGI Symbol;Acc:MGI:107752]
Cpxm2	ENSMUSG00000030862	-1.58035	7.80388e-16	carboxypeptidase X 2 (M14 family) [Source:MGI Symbol;Acc:MGI:1926006]	Yes
Col6a3	ENSMUSG00000048126	-0.731514	7.83328e-16	collagen, type VI, alpha 3 [Source:MGI Symbol;Acc:MGI:88461]
Greb1l	ENSMUSG00000042942	1.52901	7.85709e-16	growth regulation by estrogen in breast cancer-like [Source:MGI Symbol;Acc:MGI:3576497]	Yes
Rnase4	ENSMUSG00000021876	0.824415	8.21696e-16	ribonuclease, RNase A family 4 [Source:MGI Symbol;Acc:MGI:1926217]
5930403N24Rik	ENSMUSG00000046463	-1.5767	8.26615e-16	RIKEN cDNA 5930403N24 gene [Source:MGI Symbol;Acc:MGI:2444171]	Yes
Col4a2	ENSMUSG00000031503	-0.746362	9.00596e-16	collagen, type IV, alpha 2 [Source:MGI Symbol;Acc:MGI:88455]
Fstl1	ENSMUSG00000022816	0.954835	9.69898e-16	follistatin-like 1 [Source:MGI Symbol;Acc:MGI:102793]
Gsn	ENSMUSG00000026879	-1.11001	9.72784e-16	gelsolin [Source:MGI Symbol;Acc:MGI:95851]
Cldn1	ENSMUSG00000022512	-3.279	1.02212e-15	claudin 1 [Source:MGI Symbol;Acc:MGI:1276109]	Yes
Gpc1	ENSMUSG00000034220	0.594542	1.02558e-15	glypican 1 [Source:MGI Symbol;Acc:MGI:1194891]
Slc2a9	ENSMUSG00000005107	-1.887	1.09001e-15	solute carrier family 2 (facilitated glucose transporter), member 9 [Source:MGI Symbol;Acc:MGI:2152844]	Yes
Dusp14	ENSMUSG00000018648	2.08431	1.12047e-15	dual specificity phosphatase 14 [Source:MGI Symbol;Acc:MGI:1927168]	Yes
Jam2	ENSMUSG00000053062	-0.849391	1.12317e-15	junction adhesion molecule 2 [Source:MGI Symbol;Acc:MGI:1933820]
Ppp2r5b	ENSMUSG00000024777	0.770865	1.16082e-15	protein phosphatase 2, regulatory subunit B', beta [Source:MGI Symbol;Acc:MGI:2388480]
Ssr2	ENSMUSG00000041355	0.716693	1.246e-15	signal sequence receptor, beta [Source:MGI Symbol;Acc:MGI:1913506]
Cemip	ENSMUSG00000052353	-2.65408	1.49244e-15	cell migration inducing protein, hyaluronan binding [Source:MGI Symbol;Acc:MGI:2443629]	Yes
Pip	ENSMUSG00000058499	7.42781	1.53461e-15	prolactin induced protein [Source:MGI Symbol;Acc:MGI:102696]	Yes
Ldb2	ENSMUSG00000039706	-1.98054	1.53699e-15	LIM domain binding 2 [Source:MGI Symbol;Acc:MGI:894670]	Yes
Spred2	ENSMUSG00000045671	0.746846	1.84351e-15	sprouty-related EVH1 domain containing 2 [Source:MGI Symbol;Acc:MGI:2150019]
Itga10	ENSMUSG00000090210	-1.86106	1.91411e-15	integrin, alpha 10 [Source:MGI Symbol;Acc:MGI:2153482]	Yes
Efr3a	ENSMUSG00000015002	-0.888193	1.99983e-15	EFR3 homolog A [Source:MGI Symbol;Acc:MGI:1923990]
Sntb2	ENSMUSG00000041308	-0.828694	2.1289e-15	syntrophin, basic 2 [Source:MGI Symbol;Acc:MGI:101771]
Gm49342	ENSMUSG00000021871	1.03047	2.27926e-15	predicted gene, 49342 [Source:MGI Symbol;Acc:MGI:6121535]
Rhoc	ENSMUSG00000002233	0.581575	2.34149e-15	ras homolog family member C [Source:MGI Symbol;Acc:MGI:106028]
Hmga2	ENSMUSG00000056758	-1.8504	2.41419e-15	high mobility group AT-hook 2 [Source:MGI Symbol;Acc:MGI:101761]	Yes
Aopep	ENSMUSG00000021458	-0.921422	2.74612e-15	aminopeptidase O [Source:MGI Symbol;Acc:MGI:1919311]
Kpna2	ENSMUSG00000018362	0.74231	2.87741e-15	karyopherin (importin) alpha 2 [Source:MGI Symbol;Acc:MGI:103561]
Gpnmb	ENSMUSG00000029816	-1.40917	2.95616e-15	glycoprotein (transmembrane) nmb [Source:MGI Symbol;Acc:MGI:1934765]
Ptgfrn	ENSMUSG00000027864	1.04728	3.04052e-15	prostaglandin F2 receptor negative regulator [Source:MGI Symbol;Acc:MGI:1277114]
Cxcl14	ENSMUSG00000021508	2.96424	3.15807e-15	chemokine (C-X-C motif) ligand 14 [Source:MGI Symbol;Acc:MGI:1888514]	Yes
Klf6	ENSMUSG00000000078	-0.68	3.27852e-15	Kruppel-like factor 6 [Source:MGI Symbol;Acc:MGI:1346318]
Tle1	ENSMUSG00000008305	0.836213	3.47037e-15	transducin-like enhancer of split 1 [Source:MGI Symbol;Acc:MGI:104636]
Col4a5	ENSMUSG00000031274	-1.6	3.47037e-15	collagen, type IV, alpha 5 [Source:MGI Symbol;Acc:MGI:88456]	Yes
Txn1	ENSMUSG00000028367	0.522489	3.68496e-15	thioredoxin 1 [Source:MGI Symbol;Acc:MGI:98874]
Pcdhb17	ENSMUSG00000046387	0.800381	3.69865e-15	protocadherin beta 17 [Source:MGI Symbol;Acc:MGI:2136754]
Ntn4	ENSMUSG00000020019	-1.53503	3.87423e-15	netrin 4 [Source:MGI Symbol;Acc:MGI:1888978]	Yes
Tle2	ENSMUSG00000034771	-0.860606	4.20571e-15	transducin-like enhancer of split 2 [Source:MGI Symbol;Acc:MGI:104635]
Hr	ENSMUSG00000022096	3.24711	4.31673e-15	lysine demethylase and nuclear receptor corepressor [Source:MGI Symbol;Acc:MGI:96223]	Yes
Shb	ENSMUSG00000044813	0.988668	5.44242e-15	src homology 2 domain-containing transforming protein B [Source:MGI Symbol;Acc:MGI:98294]
Tead3	ENSMUSG00000002249	-0.715853	5.66639e-15	TEA domain family member 3 [Source:MGI Symbol;Acc:MGI:109241]
Olfml2b	ENSMUSG00000038463	0.707591	5.81131e-15	olfactomedin-like 2B [Source:MGI Symbol;Acc:MGI:2443310]
P4ha1	ENSMUSG00000019916	0.664196	5.81631e-15	procollagen-proline, 2-oxoglutarate 4-dioxygenase (proline 4-hydroxylase), alpha 1 polypeptide [Source:MGI Symbol;Acc:MGI:97463]
Igf2r	ENSMUSG00000023830	0.887932	6.76885e-15	insulin-like growth factor 2 receptor [Source:MGI Symbol;Acc:MGI:96435]
Gadd45b	ENSMUSG00000015312	-1.11844	6.86007e-15	growth arrest and DNA-damage-inducible 45 beta [Source:MGI Symbol;Acc:MGI:107776]
Psma1	ENSMUSG00000030751	0.680667	7.40442e-15	proteasome subunit alpha 1 [Source:MGI Symbol;Acc:MGI:1347005]
Cox6b2	ENSMUSG00000051811	-1.53597	7.58776e-15	cytochrome c oxidase subunit 6B2 [Source:MGI Symbol;Acc:MGI:3044182]	Yes
Ptprv	ENSMUSG00000097993	-1.39122	9.02094e-15	protein tyrosine phosphatase, receptor type, V [Source:MGI Symbol;Acc:MGI:108027]
Fgfr3	ENSMUSG00000054252	-2.06366	9.26668e-15	fibroblast growth factor receptor 3 [Source:MGI Symbol;Acc:MGI:95524]	Yes
Lrig2	ENSMUSG00000032913	0.945267	9.34561e-15	leucine-rich repeats and immunoglobulin-like domains 2 [Source:MGI Symbol;Acc:MGI:2443718]
Swap70	ENSMUSG00000031015	-0.912589	9.37577e-15	SWA-70 protein [Source:MGI Symbol;Acc:MGI:1298390]
Shfl	ENSMUSG00000038884	-1.22742	9.79364e-15	shiftless antiviral inhibitor of ribosomal frameshifting [Source:MGI Symbol;Acc:MGI:2441788]
Plod2	ENSMUSG00000032374	2.29381	1.08361e-14	procollagen lysine, 2-oxoglutarate 5-dioxygenase 2 [Source:MGI Symbol;Acc:MGI:1347007]	Yes
Mllt11	ENSMUSG00000053192	1.17487	1.10671e-14	myeloid/lymphoid or mixed-lineage leukemia; translocated to, 11 [Source:MGI Symbol;Acc:MGI:1929671]
Ccr1	ENSMUSG00000025804	2.03568	1.49339e-14	chemokine (C-C motif) receptor 1 [Source:MGI Symbol;Acc:MGI:104618]	Yes
Rex1bd	ENSMUSG00000058833	-0.662646	1.50356e-14	required for excision 1-B domain containing [Source:MGI Symbol;Acc:MGI:1913712]
Kiz	ENSMUSG00000074749	-0.754573	1.51549e-14	kizuna centrosomal protein [Source:MGI Symbol;Acc:MGI:2684960]
Mlf2	ENSMUSG00000030120	0.51009	1.51849e-14	myeloid leukemia factor 2 [Source:MGI Symbol;Acc:MGI:1353554]
Islr	ENSMUSG00000037206	-0.564632	1.79793e-14	immunoglobulin superfamily containing leucine-rich repeat [Source:MGI Symbol;Acc:MGI:1349645]
Marcks	ENSMUSG00000069662	-0.860585	1.88539e-14	myristoylated alanine rich protein kinase C substrate [Source:MGI Symbol;Acc:MGI:96907]
Stom	ENSMUSG00000026880	-0.855785	2.01502e-14	stomatin [Source:MGI Symbol;Acc:MGI:95403]
Man2a2	ENSMUSG00000038886	-0.554016	2.063e-14	mannosidase 2, alpha 2 [Source:MGI Symbol;Acc:MGI:2150656]
Abcc4	ENSMUSG00000032849	0.989748	2.07664e-14	ATP-binding cassette, sub-family C (CFTR/MRP), member 4 [Source:MGI Symbol;Acc:MGI:2443111]
Grb14	ENSMUSG00000026888	-0.824056	2.16764e-14	growth factor receptor bound protein 14 [Source:MGI Symbol;Acc:MGI:1355324]
Bdh1	ENSMUSG00000046598	1.95244	2.25568e-14	3-hydroxybutyrate dehydrogenase, type 1 [Source:MGI Symbol;Acc:MGI:1919161]	Yes
Ifi205	ENSMUSG00000054203	1.76504	2.35806e-14	interferon activated gene 205 [Source:MGI Symbol;Acc:MGI:101847]	Yes
Cstad	ENSMUSG00000047363	-2.30454	2.43952e-14	CSA-conditional, T cell activation-dependent protein [Source:MGI Symbol;Acc:MGI:1925867]	Yes
Chst8	ENSMUSG00000060402	3.8803	2.76012e-14	carbohydrate sulfotransferase 8 [Source:MGI Symbol;Acc:MGI:1916197]	Yes
Bid	ENSMUSG00000004446	-0.983968	2.80052e-14	BH3 interacting domain death agonist [Source:MGI Symbol;Acc:MGI:108093]
Smarca2	ENSMUSG00000024921	-0.605579	2.98072e-14	SWI/SNF related, matrix associated, actin dependent regulator of chromatin, subfamily a, member 2 [Source:MGI Symbol;Acc:MGI:99603]
Otor	ENSMUSG00000027416	-3.31485	2.99547e-14	otoraplin [Source:MGI Symbol;Acc:MGI:1888678]	Yes
Plekhf1	ENSMUSG00000074170	-1.06937	3.10369e-14	pleckstrin homology domain containing, family F (with FYVE domain) member 1 [Source:MGI Symbol;Acc:MGI:1919537]
Gclc	ENSMUSG00000032350	1.47312	3.15085e-14	glutamate-cysteine ligase, catalytic subunit [Source:MGI Symbol;Acc:MGI:104990]
Scd2	ENSMUSG00000025203	0.61282	3.1573e-14	stearoyl-Coenzyme A desaturase 2 [Source:MGI Symbol;Acc:MGI:98240]
H2-K1	ENSMUSG00000061232	-0.935201	3.66961e-14	histocompatibility 2, K1, K region [Source:MGI Symbol;Acc:MGI:95904]
Tnfaip2	ENSMUSG00000021281	-0.85631	3.84906e-14	tumor necrosis factor, alpha-induced protein 2 [Source:MGI Symbol;Acc:MGI:104960]
Dusp27	ENSMUSG00000026564	-4.58578	4.19299e-14	dual specificity phosphatase 27 (putative) [Source:MGI Symbol;Acc:MGI:2685055]	Yes
Gm13889	ENSMUSG00000087006	-1.85478	4.55195e-14	predicted gene 13889 [Source:MGI Symbol;Acc:MGI:3652053]	Yes
Gpat4	ENSMUSG00000031545	0.720249	4.7353e-14	glycerol-3-phosphate acyltransferase 4 [Source:MGI Symbol;Acc:MGI:2142716]
Fam149a	ENSMUSG00000070044	-0.705307	4.92112e-14	family with sequence similarity 149, member A [Source:MGI Symbol;Acc:MGI:2387177]
Sema3a	ENSMUSG00000028883	1.25784	4.99606e-14	sema domain, immunoglobulin domain (Ig), short basic domain, secreted, (semaphorin) 3A [Source:MGI Symbol;Acc:MGI:107558]
Vnn1	ENSMUSG00000037440	-1.48516	5.93046e-14	vanin 1 [Source:MGI Symbol;Acc:MGI:108395]
Actn3	ENSMUSG00000006457	-2.09268	6.37624e-14	actinin alpha 3 [Source:MGI Symbol;Acc:MGI:99678]	Yes
Sema6c	ENSMUSG00000038777	-1.03114	6.5325e-14	sema domain, transmembrane domain (TM), and cytoplasmic domain, (semaphorin) 6C [Source:MGI Symbol;Acc:MGI:1338032]
Chsy3	ENSMUSG00000058152	1.57262	6.72581e-14	chondroitin sulfate synthase 3 [Source:MGI Symbol;Acc:MGI:1926173]	Yes
Pthlh	ENSMUSG00000048776	8.18836	7.52944e-14	parathyroid hormone-like peptide [Source:MGI Symbol;Acc:MGI:97800]	Yes
Adcy2	ENSMUSG00000021536	0.665981	7.91118e-14	adenylate cyclase 2 [Source:MGI Symbol;Acc:MGI:99676]
Spsb1	ENSMUSG00000039911	1.45542	8.14489e-14	splA/ryanodine receptor domain and SOCS box containing 1 [Source:MGI Symbol;Acc:MGI:1921896]
Lama4	ENSMUSG00000019846	-0.732671	9.48227e-14	laminin, alpha 4 [Source:MGI Symbol;Acc:MGI:109321]
Abca9	ENSMUSG00000041797	-1.27358	9.56438e-14	ATP-binding cassette, sub-family A (ABC1), member 9 [Source:MGI Symbol;Acc:MGI:2386796]
Tpm4	ENSMUSG00000031799	0.835962	9.56959e-14	tropomyosin 4 [Source:MGI Symbol;Acc:MGI:2449202]
Riok3	ENSMUSG00000024404	0.723175	9.69131e-14	RIO kinase 3 [Source:MGI Symbol;Acc:MGI:1914128]
1700017B05Rik	ENSMUSG00000032300	1.32181	1.00977e-13	RIKEN cDNA 1700017B05 gene [Source:MGI Symbol;Acc:MGI:1921461]
Ppp2r2b	ENSMUSG00000024500	3.93528	1.01271e-13	protein phosphatase 2, regulatory subunit B, beta [Source:MGI Symbol;Acc:MGI:1920180]	Yes
Flrt3	ENSMUSG00000051379	1.34646	1.02081e-13	fibronectin leucine rich transmembrane protein 3 [Source:MGI Symbol;Acc:MGI:1918686]
Cpne8	ENSMUSG00000052560	-0.74585	1.0275e-13	copine VIII [Source:MGI Symbol;Acc:MGI:1914121]
Tnfrsf11b	ENSMUSG00000063727	-1.75604	1.07653e-13	tumor necrosis factor receptor superfamily, member 11b (osteoprotegerin) [Source:MGI Symbol;Acc:MGI:109587]	Yes
Gapdh	ENSMUSG00000057666	0.652068	1.13846e-13	glyceraldehyde-3-phosphate dehydrogenase [Source:MGI Symbol;Acc:MGI:95640]
Sema3g	ENSMUSG00000021904	2.3871	1.17634e-13	sema domain, immunoglobulin domain (Ig), short basic domain, secreted, (semaphorin) 3G [Source:MGI Symbol;Acc:MGI:3041242]	Yes
Snx7	ENSMUSG00000028007	-0.76366	1.28821e-13	sorting nexin 7 [Source:MGI Symbol;Acc:MGI:1923811]
Mchr1	ENSMUSG00000050164	1.6531	1.36221e-13	melanin-concentrating hormone receptor 1 [Source:MGI Symbol;Acc:MGI:2180756]	Yes
Vgll3	ENSMUSG00000091243	-0.867765	1.38285e-13	vestigial like family member 3 [Source:MGI Symbol;Acc:MGI:1920819]
Cmtm4	ENSMUSG00000096188	-0.533603	1.38475e-13	CKLF-like MARVEL transmembrane domain containing 4 [Source:MGI Symbol;Acc:MGI:2142888]
Pcdhac2	ENSMUSG00000102697	-1.71893	1.38475e-13	protocadherin alpha subfamily C, 2 [Source:MGI Symbol;Acc:MGI:1891443]	Yes
Fam98a	ENSMUSG00000002017	0.709112	1.41828e-13	family with sequence similarity 98, member A [Source:MGI Symbol;Acc:MGI:1919972]
Mindy3	ENSMUSG00000026767	0.727578	1.46376e-13	MINDY lysine 48 deubiquitinase 3 [Source:MGI Symbol;Acc:MGI:1914210]
Emc3	ENSMUSG00000030286	0.60804	1.50934e-13	ER membrane protein complex subunit 3 [Source:MGI Symbol;Acc:MGI:1913337]
Col5a1	ENSMUSG00000026837	1.03673	1.57533e-13	collagen, type V, alpha 1 [Source:MGI Symbol;Acc:MGI:88457]
Espn	ENSMUSG00000028943	-1.7067	1.64206e-13	espin [Source:MGI Symbol;Acc:MGI:1861630]	Yes
Ypel2	ENSMUSG00000018427	-1.20409	1.72622e-13	yippee like 2 [Source:MGI Symbol;Acc:MGI:1925114]
Rab6a	ENSMUSG00000030704	0.497992	1.72622e-13	RAB6A, member RAS oncogene family [Source:MGI Symbol;Acc:MGI:894313]
Slc25a17	ENSMUSG00000022404	0.52512	1.7435e-13	solute carrier family 25 (mitochondrial carrier, peroxisomal membrane protein), member 17 [Source:MGI Symbol;Acc:MGI:1342248]
Sec13	ENSMUSG00000030298	0.701753	1.78854e-13	SEC13 homolog, nuclear pore and COPII coat complex component [Source:MGI Symbol;Acc:MGI:99832]
1700123M08Rik	ENSMUSG00000085614	-2.31565	1.89869e-13	RIKEN cDNA 1700123M08 gene [Source:MGI Symbol;Acc:MGI:1923915]	Yes
Ccnd1	ENSMUSG00000070348	-1.10023	1.9539e-13	cyclin D1 [Source:MGI Symbol;Acc:MGI:88313]
Trp53inp2	ENSMUSG00000038375	0.703132	2.05265e-13	transformation related protein 53 inducible nuclear protein 2 [Source:MGI Symbol;Acc:MGI:1915978]
Aff2	ENSMUSG00000031189	1.58021	2.05265e-13	AF4/FMR2 family, member 2 [Source:MGI Symbol;Acc:MGI:1202294]	Yes
Phf6	ENSMUSG00000025626	0.730472	2.15638e-13	PHD finger protein 6 [Source:MGI Symbol;Acc:MGI:1918248]
Furin	ENSMUSG00000030530	0.677206	2.1655e-13	furin (paired basic amino acid cleaving enzyme) [Source:MGI Symbol;Acc:MGI:97513]
Slc6a6	ENSMUSG00000030096	-1.24853	2.19184e-13	solute carrier family 6 (neurotransmitter transporter, taurine), member 6 [Source:MGI Symbol;Acc:MGI:98488]
Scd1	ENSMUSG00000037071	1.12962	2.26955e-13	stearoyl-Coenzyme A desaturase 1 [Source:MGI Symbol;Acc:MGI:98239]
Jup	ENSMUSG00000001552	0.726454	2.27159e-13	junction plakoglobin [Source:MGI Symbol;Acc:MGI:96650]
Adamts3	ENSMUSG00000043635	2.27253	2.27159e-13	a disintegrin-like and metallopeptidase (reprolysin type) with thrombospondin type 1 motif, 3 [Source:MGI Symbol;Acc:MGI:3045353]	Yes
Ninl	ENSMUSG00000068115	-0.940943	2.27159e-13	ninein-like [Source:MGI Symbol;Acc:MGI:1925427]
Pcdhb16	ENSMUSG00000047910	0.977269	2.30832e-13	protocadherin beta 16 [Source:MGI Symbol;Acc:MGI:2136752]
Sema5a	ENSMUSG00000022231	1.36935	2.31981e-13	sema domain, seven thrombospondin repeats (type 1 and type 1-like), transmembrane domain (TM) and short cytoplasmic domain, (semaphorin) 5A [Source:MGI Symbol;Acc:MGI:107556]
Srxn1	ENSMUSG00000032802	1.09498	2.42085e-13	sulfiredoxin 1 homolog (S. cerevisiae) [Source:MGI Symbol;Acc:MGI:104971]
Tent5c	ENSMUSG00000044468	-1.44372	2.49139e-13	terminal nucleotidyltransferase 5C [Source:MGI Symbol;Acc:MGI:1921895]
Mthfr	ENSMUSG00000029009	-0.646231	2.55378e-13	methylenetetrahydrofolate reductase [Source:MGI Symbol;Acc:MGI:106639]
Samd4	ENSMUSG00000021838	-0.759992	2.58394e-13	sterile alpha motif domain containing 4 [Source:MGI Symbol;Acc:MGI:1921730]
Klhdc8a	ENSMUSG00000042115	-1.78777	2.65415e-13	kelch domain containing 8A [Source:MGI Symbol;Acc:MGI:2442630]	Yes
Zfp395	ENSMUSG00000034522	1.34508	2.66706e-13	zinc finger protein 395 [Source:MGI Symbol;Acc:MGI:2682318]
Serpine1	ENSMUSG00000037411	-3.22219	2.75869e-13	serine (or cysteine) peptidase inhibitor, clade E, member 1 [Source:MGI Symbol;Acc:MGI:97608]	Yes
Bcl2l2	ENSMUSG00000089682	0.569862	2.90563e-13	BCL2-like 2 [Source:MGI Symbol;Acc:MGI:108052]
Large1	ENSMUSG00000004383	-0.629512	3.07613e-13	LARGE xylosyl- and glucuronyltransferase 1 [Source:MGI Symbol;Acc:MGI:1342270]
Slc35d3	ENSMUSG00000050473	4.38303	3.10904e-13	solute carrier family 35, member D3 [Source:MGI Symbol;Acc:MGI:1923407]	Yes
Tns1	ENSMUSG00000055322	-0.597755	3.16133e-13	tensin 1 [Source:MGI Symbol;Acc:MGI:104552]
Crtap	ENSMUSG00000032431	-0.486401	3.34273e-13	cartilage associated protein [Source:MGI Symbol;Acc:MGI:1891221]
Slc26a7	ENSMUSG00000040569	4.00343	3.40552e-13	solute carrier family 26, member 7 [Source:MGI Symbol;Acc:MGI:2384791]	Yes
Higd1a	ENSMUSG00000038412	1.11338	3.43235e-13	HIG1 domain family, member 1A [Source:MGI Symbol;Acc:MGI:1930666]
Gpr153	ENSMUSG00000042804	0.656757	3.45536e-13	G protein-coupled receptor 153 [Source:MGI Symbol;Acc:MGI:1916157]
Bahcc1	ENSMUSG00000039741	-0.882342	3.4943e-13	BAH domain and coiled-coil containing 1 [Source:MGI Symbol;Acc:MGI:2679272]
Gfpt1	ENSMUSG00000029992	0.572963	3.90175e-13	glutamine fructose-6-phosphate transaminase 1 [Source:MGI Symbol;Acc:MGI:95698]
Rnf149	ENSMUSG00000048234	0.603598	4.03209e-13	ring finger protein 149 [Source:MGI Symbol;Acc:MGI:2677438]
Agtr1b	ENSMUSG00000054988	-4.72574	4.0594e-13	angiotensin II receptor, type 1b [Source:MGI Symbol;Acc:MGI:87965]	Yes
Acvrl1	ENSMUSG00000000530	-0.918926	4.11603e-13	activin A receptor, type II-like 1 [Source:MGI Symbol;Acc:MGI:1338946]
Mamstr	ENSMUSG00000042918	-1.18802	4.11603e-13	MEF2 activating motif and SAP domain containing transcriptional regulator [Source:MGI Symbol;Acc:MGI:1921740]
Hspa13	ENSMUSG00000032932	0.595186	4.20302e-13	heat shock protein 70 family, member 13 [Source:MGI Symbol;Acc:MGI:1309463]
Ube2g2	ENSMUSG00000009293	0.837982	4.2162e-13	ubiquitin-conjugating enzyme E2G 2 [Source:MGI Symbol;Acc:MGI:1343188]
Rab32	ENSMUSG00000019832	-0.76639	4.2162e-13	RAB32, member RAS oncogene family [Source:MGI Symbol;Acc:MGI:1915094]
Phactr1	ENSMUSG00000054728	-1.30129	4.37639e-13	phosphatase and actin regulator 1 [Source:MGI Symbol;Acc:MGI:2659021]
Agrn	ENSMUSG00000041936	-0.720137	4.95199e-13	agrin [Source:MGI Symbol;Acc:MGI:87961]
Map7d1	ENSMUSG00000028849	0.589408	5.31188e-13	MAP7 domain containing 1 [Source:MGI Symbol;Acc:MGI:2384297]
Adm	ENSMUSG00000030790	-3.80293	5.32791e-13	adrenomedullin [Source:MGI Symbol;Acc:MGI:108058]	Yes
Sbf2	ENSMUSG00000038371	-0.571328	5.83359e-13	SET binding factor 2 [Source:MGI Symbol;Acc:MGI:1921831]
Loxl1	ENSMUSG00000032334	0.64844	5.83366e-13	lysyl oxidase-like 1 [Source:MGI Symbol;Acc:MGI:106096]
Ghr	ENSMUSG00000055737	0.644747	6.04064e-13	growth hormone receptor [Source:MGI Symbol;Acc:MGI:95708]
Fgf10	ENSMUSG00000021732	1.30621	6.12082e-13	fibroblast growth factor 10 [Source:MGI Symbol;Acc:MGI:1099809]
Top2a	ENSMUSG00000020914	0.718558	6.69277e-13	topoisomerase (DNA) II alpha [Source:MGI Symbol;Acc:MGI:98790]
Cttnbp2	ENSMUSG00000000416	-2.51585	6.81729e-13	cortactin binding protein 2 [Source:MGI Symbol;Acc:MGI:1353467]	Yes
Tmem45a	ENSMUSG00000022754	1.24945	6.84666e-13	transmembrane protein 45a [Source:MGI Symbol;Acc:MGI:1913122]
Lypd1	ENSMUSG00000026344	-3.42481	6.86449e-13	Ly6/Plaur domain containing 1 [Source:MGI Symbol;Acc:MGI:1919835]	Yes
6330403K07Rik	ENSMUSG00000018451	-2.11603	7.03171e-13	RIKEN cDNA 6330403K07 gene [Source:MGI Symbol;Acc:MGI:1918001]	Yes
Plekhg3	ENSMUSG00000052609	0.810951	7.63317e-13	pleckstrin homology domain containing, family G (with RhoGef domain) member 3 [Source:MGI Symbol;Acc:MGI:2388284]
Itpr3	ENSMUSG00000042644	-0.969239	7.65201e-13	inositol 1,4,5-triphosphate receptor 3 [Source:MGI Symbol;Acc:MGI:96624]
Il13ra2	ENSMUSG00000031289	2.3865	7.86669e-13	interleukin 13 receptor, alpha 2 [Source:MGI Symbol;Acc:MGI:1277954]	Yes
Hip1	ENSMUSG00000039959	-0.941719	8.08335e-13	huntingtin interacting protein 1 [Source:MGI Symbol;Acc:MGI:1099804]
Klhdc8b	ENSMUSG00000032609	-0.934496	8.12961e-13	kelch domain containing 8B [Source:MGI Symbol;Acc:MGI:1925517]
Ivd	ENSMUSG00000027332	-0.620226	8.23555e-13	isovaleryl coenzyme A dehydrogenase [Source:MGI Symbol;Acc:MGI:1929242]
Ackr3	ENSMUSG00000044337	1.05164	8.36721e-13	atypical chemokine receptor 3 [Source:MGI Symbol;Acc:MGI:109562]
Gm28875	ENSMUSG00000100975	-1.88617	8.63775e-13	predicted gene 28875 [Source:MGI Symbol;Acc:MGI:5579581]	Yes
Icmt	ENSMUSG00000039662	0.611077	8.69662e-13	isoprenylcysteine carboxyl methyltransferase [Source:MGI Symbol;Acc:MGI:1888594]
Manf	ENSMUSG00000032575	0.604804	8.83639e-13	mesencephalic astrocyte-derived neurotrophic factor [Source:MGI Symbol;Acc:MGI:1922090]
Arntl	ENSMUSG00000055116	1.02362	9.31622e-13	aryl hydrocarbon receptor nuclear translocator-like [Source:MGI Symbol;Acc:MGI:1096381]
Zc3h12a	ENSMUSG00000042677	-0.848222	9.57081e-13	zinc finger CCCH type containing 12A [Source:MGI Symbol;Acc:MGI:2385891]
Col6a1	ENSMUSG00000001119	-0.502596	1.01206e-12	collagen, type VI, alpha 1 [Source:MGI Symbol;Acc:MGI:88459]
Igf1r	ENSMUSG00000005533	0.666691	1.0224e-12	insulin-like growth factor I receptor [Source:MGI Symbol;Acc:MGI:96433]
Timp1	ENSMUSG00000001131	1.15548	1.05307e-12	tissue inhibitor of metalloproteinase 1 [Source:MGI Symbol;Acc:MGI:98752]
Prkar2b	ENSMUSG00000002997	-1.37634	1.05922e-12	protein kinase, cAMP dependent regulatory, type II beta [Source:MGI Symbol;Acc:MGI:97760]
Calhm5	ENSMUSG00000049872	-0.775778	1.0655e-12	calcium homeostasis modulator family member 5 [Source:MGI Symbol;Acc:MGI:2143897]
Parvb	ENSMUSG00000022438	0.970625	1.0916e-12	parvin, beta [Source:MGI Symbol;Acc:MGI:2153063]
Dmpk	ENSMUSG00000030409	-0.960062	1.11125e-12	dystrophia myotonica-protein kinase [Source:MGI Symbol;Acc:MGI:94906]
Serinc1	ENSMUSG00000019877	0.521493	1.12101e-12	serine incorporator 1 [Source:MGI Symbol;Acc:MGI:1926228]
Fam189a2	ENSMUSG00000071604	3.7877	1.15568e-12	family with sequence similarity 189, member A2 [Source:MGI Symbol;Acc:MGI:2685813]	Yes
Abcb1b	ENSMUSG00000028970	-0.831815	1.15794e-12	ATP-binding cassette, sub-family B (MDR/TAP), member 1B [Source:MGI Symbol;Acc:MGI:97568]
Bcl2l1	ENSMUSG00000007659	-0.727973	1.16321e-12	BCL2-like 1 [Source:MGI Symbol;Acc:MGI:88139]
Asic3	ENSMUSG00000038276	-3.13605	1.23858e-12	acid-sensing (proton-gated) ion channel 3 [Source:MGI Symbol;Acc:MGI:2159339]	Yes
Prkar1b	ENSMUSG00000025855	-0.774674	1.25542e-12	protein kinase, cAMP dependent regulatory, type I beta [Source:MGI Symbol;Acc:MGI:97759]
Stac2	ENSMUSG00000017400	0.624368	1.28811e-12	SH3 and cysteine rich domain 2 [Source:MGI Symbol;Acc:MGI:2144518]
C1qtnf1	ENSMUSG00000017446	0.806021	1.28811e-12	C1q and tumor necrosis factor related protein 1 [Source:MGI Symbol;Acc:MGI:1919254]
Txnrd1	ENSMUSG00000020250	0.801698	1.29213e-12	thioredoxin reductase 1 [Source:MGI Symbol;Acc:MGI:1354175]
Mturn	ENSMUSG00000038065	-0.727083	1.33551e-12	maturin, neural progenitor differentiation regulator homolog (Xenopus) [Source:MGI Symbol;Acc:MGI:1915485]
Clcf1	ENSMUSG00000040663	0.998204	1.35332e-12	cardiotrophin-like cytokine factor 1 [Source:MGI Symbol;Acc:MGI:1930088]
Gmppb	ENSMUSG00000070284	0.751634	1.41643e-12	GDP-mannose pyrophosphorylase B [Source:MGI Symbol;Acc:MGI:2660880]
Ptp4a1	ENSMUSG00000026064	1.04576	1.42662e-12	protein tyrosine phosphatase 4a1 [Source:MGI Symbol;Acc:MGI:1277096]
Lxn	ENSMUSG00000047557	-0.603928	1.53463e-12	latexin [Source:MGI Symbol;Acc:MGI:107633]
Cdkn2a	ENSMUSG00000044303	-0.612642	1.57041e-12	cyclin dependent kinase inhibitor 2A [Source:MGI Symbol;Acc:MGI:104738]
Npas2	ENSMUSG00000026077	-1.30772	1.5835e-12	neuronal PAS domain protein 2 [Source:MGI Symbol;Acc:MGI:109232]
Edem1	ENSMUSG00000030104	0.733247	1.59687e-12	ER degradation enhancer, mannosidase alpha-like 1 [Source:MGI Symbol;Acc:MGI:2180139]
Tmed4	ENSMUSG00000004394	0.632559	1.73506e-12	transmembrane p24 trafficking protein 4 [Source:MGI Symbol;Acc:MGI:1915070]
BC031181	ENSMUSG00000036299	0.590371	1.74119e-12	cDNA sequence BC031181 [Source:MGI Symbol;Acc:MGI:3039614]
Npy1r	ENSMUSG00000036437	2.16985	1.85188e-12	neuropeptide Y receptor Y1 [Source:MGI Symbol;Acc:MGI:104963]	Yes
4632415L05Rik	ENSMUSG00000048106	-0.884994	1.89028e-12	RIKEN cDNA 4632415L05 gene [Source:MGI Symbol;Acc:MGI:1918058]
Zdhhc14	ENSMUSG00000034265	1.10394	1.97225e-12	zinc finger, DHHC domain containing 14 [Source:MGI Symbol;Acc:MGI:2653229]
Arhgef4	ENSMUSG00000037509	-1.13402	1.98495e-12	Rho guanine nucleotide exchange factor (GEF) 4 [Source:MGI Symbol;Acc:MGI:2442507]
Hsp25-ps1	ENSMUSG00000078915	-2.88321	2.02829e-12	heat shock protein 25, pseudogene 1 [Source:MGI Symbol;Acc:MGI:96241]	Yes
P4ha2	ENSMUSG00000018906	0.861086	2.06028e-12	procollagen-proline, 2-oxoglutarate 4-dioxygenase (proline 4-hydroxylase), alpha II polypeptide [Source:MGI Symbol;Acc:MGI:894286]
Pyroxd2	ENSMUSG00000060224	-0.891686	2.12337e-12	pyridine nucleotide-disulphide oxidoreductase domain 2 [Source:MGI Symbol;Acc:MGI:1921830]
Bmp2	ENSMUSG00000027358	3.2414	2.18289e-12	bone morphogenetic protein 2 [Source:MGI Symbol;Acc:MGI:88177]	Yes
Ostc	ENSMUSG00000041084	0.683773	2.18595e-12	oligosaccharyltransferase complex subunit (non-catalytic) [Source:MGI Symbol;Acc:MGI:1913607]
Peak1	ENSMUSG00000074305	-0.702401	2.39886e-12	pseudopodium-enriched atypical kinase 1 [Source:MGI Symbol;Acc:MGI:2442366]
Ctsf	ENSMUSG00000083282	-0.591974	2.48667e-12	cathepsin F [Source:MGI Symbol;Acc:MGI:1861434]
Dhx58os	ENSMUSG00000085604	-2.55104	2.61401e-12	DEAH (Asp-Glu-Ala-His) box polypeptide 58, opposite strand [Source:MGI Symbol;Acc:MGI:3705104]	Yes
Gstt1	ENSMUSG00000001663	-0.964043	2.64391e-12	glutathione S-transferase, theta 1 [Source:MGI Symbol;Acc:MGI:107379]
Piezo2	ENSMUSG00000041482	1.4566	2.87246e-12	piezo-type mechanosensitive ion channel component 2 [Source:MGI Symbol;Acc:MGI:1918781]
Agbl2	ENSMUSG00000040812	-1.44622	3.01183e-12	ATP/GTP binding protein-like 2 [Source:MGI Symbol;Acc:MGI:2443254]
Dpp7	ENSMUSG00000026958	-0.755364	3.25902e-12	dipeptidylpeptidase 7 [Source:MGI Symbol;Acc:MGI:1933213]
Calca	ENSMUSG00000030669	1.98141	3.61387e-12	calcitonin/calcitonin-related polypeptide, alpha [Source:MGI Symbol;Acc:MGI:2151253]	Yes
Actg1	ENSMUSG00000062825	0.778934	3.76997e-12	actin, gamma, cytoplasmic 1 [Source:MGI Symbol;Acc:MGI:87906]
Rnasel	ENSMUSG00000066800	-1.42543	3.76997e-12	ribonuclease L (2', 5'-oligoisoadenylate synthetase-dependent) [Source:MGI Symbol;Acc:MGI:1098272]
Dnajc3	ENSMUSG00000022136	0.508968	3.85968e-12	DnaJ heat shock protein family (Hsp40) member C3 [Source:MGI Symbol;Acc:MGI:107373]
Pxk	ENSMUSG00000033885	0.801258	3.8706e-12	PX domain containing serine/threonine kinase [Source:MGI Symbol;Acc:MGI:1289230]
Tmc7	ENSMUSG00000042246	1.96649	3.94947e-12	transmembrane channel-like gene family 7 [Source:MGI Symbol;Acc:MGI:2443317]	Yes
Psd4	ENSMUSG00000026979	-1.3877	4.20899e-12	pleckstrin and Sec7 domain containing 4 [Source:MGI Symbol;Acc:MGI:2674093]
Prdm11	ENSMUSG00000075028	-1.42814	4.20899e-12	PR domain containing 11 [Source:MGI Symbol;Acc:MGI:2685553]
Gbp2	ENSMUSG00000028270	-1.03908	4.37242e-12	guanylate binding protein 2 [Source:MGI Symbol;Acc:MGI:102772]
Smim4	ENSMUSG00000058351	1.15687	4.38095e-12	small integral membrane protein 4 [Source:MGI Symbol;Acc:MGI:1913737]
Mmd	ENSMUSG00000003948	1.13866	4.76616e-12	monocyte to macrophage differentiation-associated [Source:MGI Symbol;Acc:MGI:1914718]
Cebpa	ENSMUSG00000034957	-1.23686	4.83635e-12	CCAAT/enhancer binding protein (C/EBP), alpha [Source:MGI Symbol;Acc:MGI:99480]
Ecm2	ENSMUSG00000043631	-1.00524	4.99304e-12	extracellular matrix protein 2, female organ and adipocyte specific [Source:MGI Symbol;Acc:MGI:3039578]
Camk4	ENSMUSG00000038128	1.6494	5.03789e-12	calcium/calmodulin-dependent protein kinase IV [Source:MGI Symbol;Acc:MGI:88258]	Yes
Gpsm2	ENSMUSG00000027883	-0.858443	5.06962e-12	G-protein signalling modulator 2 (AGS3-like, C. elegans) [Source:MGI Symbol;Acc:MGI:1923373]
Lrp1	ENSMUSG00000040249	0.796003	5.06962e-12	low density lipoprotein receptor-related protein 1 [Source:MGI Symbol;Acc:MGI:96828]
Srpx	ENSMUSG00000090084	-0.712272	5.29024e-12	sushi-repeat-containing protein [Source:MGI Symbol;Acc:MGI:1858306]
Nt5e	ENSMUSG00000032420	-1.16215	5.32973e-12	5' nucleotidase, ecto [Source:MGI Symbol;Acc:MGI:99782]
Bace2	ENSMUSG00000040605	0.760168	5.66197e-12	beta-site APP-cleaving enzyme 2 [Source:MGI Symbol;Acc:MGI:1860440]
Epha2	ENSMUSG00000006445	-0.697189	5.8109e-12	Eph receptor A2 [Source:MGI Symbol;Acc:MGI:95278]
Gng7	ENSMUSG00000048240	-0.77421	5.94258e-12	guanine nucleotide binding protein (G protein), gamma 7 [Source:MGI Symbol;Acc:MGI:95787]
Pear1	ENSMUSG00000028073	-1.09178	6.79819e-12	platelet endothelial aggregation receptor 1 [Source:MGI Symbol;Acc:MGI:1920432]
Daam2	ENSMUSG00000040260	1.11344	7.0029e-12	dishevelled associated activator of morphogenesis 2 [Source:MGI Symbol;Acc:MGI:1923691]
Myh9	ENSMUSG00000022443	-0.435557	7.14115e-12	myosin, heavy polypeptide 9, non-muscle [Source:MGI Symbol;Acc:MGI:107717]
Sestd1	ENSMUSG00000042272	0.626902	7.69477e-12	SEC14 and spectrin domains 1 [Source:MGI Symbol;Acc:MGI:1916262]
Pir	ENSMUSG00000031379	-1.06323	7.75613e-12	pirin [Source:MGI Symbol;Acc:MGI:1916906]
Adgra1	ENSMUSG00000025475	2.96996	7.92255e-12	adhesion G protein-coupled receptor A1 [Source:MGI Symbol;Acc:MGI:1277167]	Yes
Ndrg1	ENSMUSG00000005125	-0.531375	8.04812e-12	N-myc downstream regulated gene 1 [Source:MGI Symbol;Acc:MGI:1341799]
Adcy7	ENSMUSG00000031659	1.51817	8.22052e-12	adenylate cyclase 7 [Source:MGI Symbol;Acc:MGI:102891]	Yes
Fhod1	ENSMUSG00000014778	-0.937979	8.39666e-12	formin homology 2 domain containing 1 [Source:MGI Symbol;Acc:MGI:2679008]
Cfl1	ENSMUSG00000056201	0.484133	8.53887e-12	cofilin 1, non-muscle [Source:MGI Symbol;Acc:MGI:101757]
Gng4	ENSMUSG00000021303	1.65707	8.67883e-12	guanine nucleotide binding protein (G protein), gamma 4 [Source:MGI Symbol;Acc:MGI:102703]	Yes
Iqsec1	ENSMUSG00000034312	-0.594407	8.67883e-12	IQ motif and Sec7 domain 1 [Source:MGI Symbol;Acc:MGI:1196356]
Hk2	ENSMUSG00000000628	1.52584	8.68591e-12	hexokinase 2 [Source:MGI Symbol;Acc:MGI:1315197]	Yes
Amotl2	ENSMUSG00000032531	-1.0513	8.70357e-12	angiomotin-like 2 [Source:MGI Symbol;Acc:MGI:1929286]
Mbnl2	ENSMUSG00000022139	0.447955	8.81175e-12	muscleblind like splicing factor 2 [Source:MGI Symbol;Acc:MGI:2145597]
Sec23a	ENSMUSG00000020986	0.482099	9.03836e-12	SEC23 homolog A, COPII coat complex component [Source:MGI Symbol;Acc:MGI:1349635]
Snx18	ENSMUSG00000042364	0.603531	9.16235e-12	sorting nexin 18 [Source:MGI Symbol;Acc:MGI:2137642]
Nudt4	ENSMUSG00000020029	0.446398	9.22288e-12	nudix (nucleoside diphosphate linked moiety X)-type motif 4 [Source:MGI Symbol;Acc:MGI:1918457]
Kcnq4	ENSMUSG00000028631	-3.95282	9.22288e-12	potassium voltage-gated channel, subfamily Q, member 4 [Source:MGI Symbol;Acc:MGI:1926803]	Yes
Gcnt1	ENSMUSG00000038843	-1.86085	1.01405e-11	glucosaminyl (N-acetyl) transferase 1, core 2 [Source:MGI Symbol;Acc:MGI:95676]	Yes
Prr5	ENSMUSG00000036106	0.940224	1.03753e-11	proline rich 5 (renal) [Source:MGI Symbol;Acc:MGI:1924714]
Tacc2	ENSMUSG00000030852	-0.82145	1.04139e-11	transforming, acidic coiled-coil containing protein 2 [Source:MGI Symbol;Acc:MGI:1928899]
Vamp5	ENSMUSG00000073002	-1.42369	1.08081e-11	vesicle-associated membrane protein 5 [Source:MGI Symbol;Acc:MGI:1858622]
Phip	ENSMUSG00000032253	-0.781369	1.08941e-11	pleckstrin homology domain interacting protein [Source:MGI Symbol;Acc:MGI:1932404]
Idh2	ENSMUSG00000030541	-0.795576	1.09365e-11	isocitrate dehydrogenase 2 (NADP+), mitochondrial [Source:MGI Symbol;Acc:MGI:96414]
Plekha7	ENSMUSG00000045659	-1.81298	1.18917e-11	pleckstrin homology domain containing, family A member 7 [Source:MGI Symbol;Acc:MGI:2445094]	Yes
Pgam2	ENSMUSG00000020475	-3.62428	1.19682e-11	phosphoglycerate mutase 2 [Source:MGI Symbol;Acc:MGI:1933118]	Yes
Jkamp	ENSMUSG00000005078	0.61936	1.22067e-11	JNK1/MAPK8-associated membrane protein [Source:MGI Symbol;Acc:MGI:1915057]
Gas1	ENSMUSG00000052957	-0.59842	1.22854e-11	growth arrest specific 1 [Source:MGI Symbol;Acc:MGI:95655]
Fitm2	ENSMUSG00000048486	0.802744	1.25472e-11	fat storage-inducing transmembrane protein 2 [Source:MGI Symbol;Acc:MGI:2444508]
Zhx2	ENSMUSG00000071757	0.838753	1.34829e-11	zinc fingers and homeoboxes 2 [Source:MGI Symbol;Acc:MGI:2683087]
Ctxn1	ENSMUSG00000048644	0.766929	1.354e-11	cortexin 1 [Source:MGI Symbol;Acc:MGI:88566]
Ptges	ENSMUSG00000050737	-0.512974	1.48331e-11	prostaglandin E synthase [Source:MGI Symbol;Acc:MGI:1927593]
Mtcl1	ENSMUSG00000052105	0.942362	1.48331e-11	microtubule crosslinking factor 1 [Source:MGI Symbol;Acc:MGI:1915867]
Caprin2	ENSMUSG00000030309	-0.964858	1.49952e-11	caprin family member 2 [Source:MGI Symbol;Acc:MGI:2448541]
Etv6	ENSMUSG00000030199	0.868591	1.51102e-11	ets variant 6 [Source:MGI Symbol;Acc:MGI:109336]
Timp4	ENSMUSG00000030317	-5.1367	1.59679e-11	tissue inhibitor of metalloproteinase 4 [Source:MGI Symbol;Acc:MGI:109125]	Yes
Uck2	ENSMUSG00000026558	1.02274	1.59804e-11	uridine-cytidine kinase 2 [Source:MGI Symbol;Acc:MGI:1931744]
Fbln1	ENSMUSG00000006369	0.858653	1.59866e-11	fibulin 1 [Source:MGI Symbol;Acc:MGI:95487]
Hacd2	ENSMUSG00000035376	-1.07188	1.60691e-11	3-hydroxyacyl-CoA dehydratase 2 [Source:MGI Symbol;Acc:MGI:1918007]
Nos1	ENSMUSG00000029361	2.84253	1.63264e-11	nitric oxide synthase 1, neuronal [Source:MGI Symbol;Acc:MGI:97360]	Yes
Slc9a9	ENSMUSG00000031129	-1.20643	1.6412e-11	solute carrier family 9 (sodium/hydrogen exchanger), member 9 [Source:MGI Symbol;Acc:MGI:2679732]
ENSMUSG00000072812	ENSMUSG00000072812	-0.740118	1.66448e-11	NA
Col7a1	ENSMUSG00000025650	-1.36146	1.66569e-11	collagen, type VII, alpha 1 [Source:MGI Symbol;Acc:MGI:88462]
Fkbp5	ENSMUSG00000024222	-1.38591	1.69859e-11	FK506 binding protein 5 [Source:MGI Symbol;Acc:MGI:104670]
Aldh1l1	ENSMUSG00000030088	-0.672503	1.73758e-11	aldehyde dehydrogenase 1 family, member L1 [Source:MGI Symbol;Acc:MGI:1340024]
Cnnm2	ENSMUSG00000064105	1.21525	1.73758e-11	cyclin M2 [Source:MGI Symbol;Acc:MGI:2151054]
Smpd1	ENSMUSG00000037049	0.53034	1.8654e-11	sphingomyelin phosphodiesterase 1, acid lysosomal [Source:MGI Symbol;Acc:MGI:98325]
Atp6v0e	ENSMUSG00000015575	0.492233	1.88164e-11	ATPase, H+ transporting, lysosomal V0 subunit E [Source:MGI Symbol;Acc:MGI:1328318]
Anxa3	ENSMUSG00000029484	-0.868489	1.95643e-11	annexin A3 [Source:MGI Symbol;Acc:MGI:1201378]
Ahsa2	ENSMUSG00000020288	0.567807	1.96283e-11	AHA1, activator of heat shock protein ATPase 2 [Source:MGI Symbol;Acc:MGI:1916133]
Fhdc1	ENSMUSG00000041842	-2.25544	1.99492e-11	FH2 domain containing 1 [Source:MGI Symbol;Acc:MGI:2684972]	Yes
Otud7b	ENSMUSG00000038495	0.592155	2.00544e-11	OTU domain containing 7B [Source:MGI Symbol;Acc:MGI:2654703]
Sorcs2	ENSMUSG00000029093	-0.922054	2.0678e-11	sortilin-related VPS10 domain containing receptor 2 [Source:MGI Symbol;Acc:MGI:1932289]
Pde1a	ENSMUSG00000059173	1.0126	2.15173e-11	phosphodiesterase 1A, calmodulin-dependent [Source:MGI Symbol;Acc:MGI:1201792]
Alg5	ENSMUSG00000036632	0.623742	2.19093e-11	asparagine-linked glycosylation 5 (dolichyl-phosphate beta-glucosyltransferase) [Source:MGI Symbol;Acc:MGI:1913498]
Mylip	ENSMUSG00000038175	-0.835026	2.29649e-11	myosin regulatory light chain interacting protein [Source:MGI Symbol;Acc:MGI:2388271]
Flrt2	ENSMUSG00000047414	0.769421	2.39066e-11	fibronectin leucine rich transmembrane protein 2 [Source:MGI Symbol;Acc:MGI:3603594]
Dipk1a	ENSMUSG00000029270	0.849687	2.4056e-11	divergent protein kinase domain 1A [Source:MGI Symbol;Acc:MGI:1914516]
Spta1	ENSMUSG00000026532	-1.79456	2.46897e-11	spectrin alpha, erythrocytic 1 [Source:MGI Symbol;Acc:MGI:98385]	Yes
Mfap5	ENSMUSG00000030116	-0.826688	2.57183e-11	microfibrillar associated protein 5 [Source:MGI Symbol;Acc:MGI:1354387]
Kansl2	ENSMUSG00000022992	0.715229	2.63726e-11	KAT8 regulatory NSL complex subunit 2 [Source:MGI Symbol;Acc:MGI:1916862]
Tbc1d2	ENSMUSG00000039813	-0.982317	2.63726e-11	TBC1 domain family, member 2 [Source:MGI Symbol;Acc:MGI:2652885]
Golph3	ENSMUSG00000022200	0.520895	2.74772e-11	golgi phosphoprotein 3 [Source:MGI Symbol;Acc:MGI:1913879]
Ly6e	ENSMUSG00000022587	0.950243	2.79979e-11	lymphocyte antigen 6 complex, locus E [Source:MGI Symbol;Acc:MGI:106651]
Ptpn21	ENSMUSG00000021009	-0.852684	2.88643e-11	protein tyrosine phosphatase, non-receptor type 21 [Source:MGI Symbol;Acc:MGI:1344406]
Slc27a6	ENSMUSG00000024600	-1.77145	2.94635e-11	solute carrier family 27 (fatty acid transporter), member 6 [Source:MGI Symbol;Acc:MGI:3036230]	Yes
Lama2	ENSMUSG00000019899	-0.880415	3.07961e-11	laminin, alpha 2 [Source:MGI Symbol;Acc:MGI:99912]
Ccn1	ENSMUSG00000028195	-1.20694	3.16906e-11	cellular communication network factor 1 [Source:MGI Symbol;Acc:MGI:88613]
Vim	ENSMUSG00000026728	-0.55784	3.17545e-11	vimentin [Source:MGI Symbol;Acc:MGI:98932]
Fkbp10	ENSMUSG00000001555	0.685647	3.21963e-11	FK506 binding protein 10 [Source:MGI Symbol;Acc:MGI:104769]
Ppfia4	ENSMUSG00000026458	-2.63343	3.23689e-11	protein tyrosine phosphatase, receptor type, f polypeptide (PTPRF), interacting protein (liprin), alpha 4 [Source:MGI Symbol;Acc:MGI:1915757]	Yes
Gmfb	ENSMUSG00000062014	0.497281	3.36704e-11	glia maturation factor, beta [Source:MGI Symbol;Acc:MGI:1927133]
Ldha	ENSMUSG00000063229	0.451222	3.39187e-11	lactate dehydrogenase A [Source:MGI Symbol;Acc:MGI:96759]
Obsl1	ENSMUSG00000026211	-0.554978	3.52554e-11	obscurin-like 1 [Source:MGI Symbol;Acc:MGI:2138628]
Pitrm1	ENSMUSG00000021193	-0.481741	3.64281e-11	pitrilysin metallepetidase 1 [Source:MGI Symbol;Acc:MGI:1916867]
Mamdc2	ENSMUSG00000033207	-3.83095	3.66874e-11	MAM domain containing 2 [Source:MGI Symbol;Acc:MGI:1918988]	Yes
Svep1	ENSMUSG00000028369	-0.951613	3.73737e-11	sushi, von Willebrand factor type A, EGF and pentraxin domain containing 1 [Source:MGI Symbol;Acc:MGI:1928849]
Fbxl2	ENSMUSG00000032507	-1.0584	3.73835e-11	F-box and leucine-rich repeat protein 2 [Source:MGI Symbol;Acc:MGI:1919429]
Sparcl1	ENSMUSG00000029309	-2.04816	3.87639e-11	SPARC-like 1 [Source:MGI Symbol;Acc:MGI:108110]	Yes
Ezr	ENSMUSG00000052397	1.28447	3.87971e-11	ezrin [Source:MGI Symbol;Acc:MGI:98931]
Elmo2	ENSMUSG00000017670	-0.529099	3.96383e-11	engulfment and cell motility 2 [Source:MGI Symbol;Acc:MGI:2153045]
Tmem151a	ENSMUSG00000061451	-1.28014	3.9799e-11	transmembrane protein 151A [Source:MGI Symbol;Acc:MGI:2147713]
Ngfr	ENSMUSG00000000120	2.12077	4.09915e-11	nerve growth factor receptor (TNFR superfamily, member 16) [Source:MGI Symbol;Acc:MGI:97323]	Yes
Prg4	ENSMUSG00000006014	2.82605	4.09915e-11	proteoglycan 4 (megakaryocyte stimulating factor, articular superficial zone protein) [Source:MGI Symbol;Acc:MGI:1891344]	Yes
Pdlim7	ENSMUSG00000021493	0.633367	4.4411e-11	PDZ and LIM domain 7 [Source:MGI Symbol;Acc:MGI:1914649]
Cacnb4	ENSMUSG00000017412	-1.90572	4.59422e-11	calcium channel, voltage-dependent, beta 4 subunit [Source:MGI Symbol;Acc:MGI:103301]	Yes
Kctd8	ENSMUSG00000037653	2.12479	4.64291e-11	potassium channel tetramerisation domain containing 8 [Source:MGI Symbol;Acc:MGI:2443804]	Yes
Ass1	ENSMUSG00000076441	-0.837915	4.67312e-11	argininosuccinate synthetase 1 [Source:MGI Symbol;Acc:MGI:88090]
Tgfb3	ENSMUSG00000021253	1.21185	4.76409e-11	transforming growth factor, beta 3 [Source:MGI Symbol;Acc:MGI:98727]
Ube2s	ENSMUSG00000060860	0.570736	4.87182e-11	ubiquitin-conjugating enzyme E2S [Source:MGI Symbol;Acc:MGI:1925141]
Sphk1	ENSMUSG00000061878	0.859725	5.0699e-11	sphingosine kinase 1 [Source:MGI Symbol;Acc:MGI:1316649]
Tcp11l2	ENSMUSG00000020034	-0.562607	5.08372e-11	t-complex 11 (mouse) like 2 [Source:MGI Symbol;Acc:MGI:2444679]
Pdk2	ENSMUSG00000038967	-0.719259	5.12989e-11	pyruvate dehydrogenase kinase, isoenzyme 2 [Source:MGI Symbol;Acc:MGI:1343087]
Atl2	ENSMUSG00000059811	0.76617	5.21653e-11	atlastin GTPase 2 [Source:MGI Symbol;Acc:MGI:1929492]
Kif1a	ENSMUSG00000014602	-1.12264	5.30694e-11	kinesin family member 1A [Source:MGI Symbol;Acc:MGI:108391]
Egfr	ENSMUSG00000020122	-0.684755	5.30694e-11	epidermal growth factor receptor [Source:MGI Symbol;Acc:MGI:95294]
Epha5	ENSMUSG00000029245	3.4838	5.61278e-11	Eph receptor A5 [Source:MGI Symbol;Acc:MGI:99654]	Yes
Zfp52	ENSMUSG00000051341	0.9051	5.79715e-11	zinc finger protein 52 [Source:MGI Symbol;Acc:MGI:99199]
Htra1	ENSMUSG00000006205	1.07278	6.23214e-11	HtrA serine peptidase 1 [Source:MGI Symbol;Acc:MGI:1929076]
H2-D1	ENSMUSG00000073411	-1.02542	6.28662e-11	histocompatibility 2, D region locus 1 [Source:MGI Symbol;Acc:MGI:95896]
AI854703	ENSMUSG00000053297	-1.36202	6.36263e-11	expressed sequence AI854703 [Source:MGI Symbol;Acc:MGI:2141510]
Larp1b	ENSMUSG00000025762	1.49715	6.37495e-11	La ribonucleoprotein domain family, member 1B [Source:MGI Symbol;Acc:MGI:1914604]
Ptch1	ENSMUSG00000021466	0.85696	6.41104e-11	patched 1 [Source:MGI Symbol;Acc:MGI:105373]
Hvcn1	ENSMUSG00000064267	-1.01699	6.58714e-11	hydrogen voltage-gated channel 1 [Source:MGI Symbol;Acc:MGI:1921346]
Jund	ENSMUSG00000071076	0.723924	6.61305e-11	jun D proto-oncogene [Source:MGI Symbol;Acc:MGI:96648]
Agt	ENSMUSG00000031980	-2.71966	6.65625e-11	angiotensinogen (serpin peptidase inhibitor, clade A, member 8) [Source:MGI Symbol;Acc:MGI:87963]	Yes
Hs6st1	ENSMUSG00000045216	-0.910977	7.00696e-11	heparan sulfate 6-O-sulfotransferase 1 [Source:MGI Symbol;Acc:MGI:1354958]
Fbn1	ENSMUSG00000027204	0.932855	7.39491e-11	fibrillin 1 [Source:MGI Symbol;Acc:MGI:95489]
Trak2	ENSMUSG00000026028	0.566683	7.87562e-11	trafficking protein, kinesin binding 2 [Source:MGI Symbol;Acc:MGI:1918077]
Crygs	ENSMUSG00000033501	-2.02626	8.00474e-11	crystallin, gamma S [Source:MGI Symbol;Acc:MGI:1298216]	Yes
Armh4	ENSMUSG00000036242	-0.829507	8.10415e-11	armadillo-like helical domain containing 4 [Source:MGI Symbol;Acc:MGI:1914669]
Clca3a1	ENSMUSG00000056025	-2.90533	9.29375e-11	chloride channel accessory 3A1 [Source:MGI Symbol;Acc:MGI:1316732]	Yes
Garnl3	ENSMUSG00000038860	-0.979184	9.34217e-11	GTPase activating RANGAP domain-like 3 [Source:MGI Symbol;Acc:MGI:2139309]
Efr3b	ENSMUSG00000020658	-1.18649	9.38605e-11	EFR3 homolog B [Source:MGI Symbol;Acc:MGI:2444851]
Sparc	ENSMUSG00000018593	0.637187	9.4101e-11	secreted acidic cysteine rich glycoprotein [Source:MGI Symbol;Acc:MGI:98373]
Abce1	ENSMUSG00000058355	0.560939	9.98665e-11	ATP-binding cassette, sub-family E (OABP), member 1 [Source:MGI Symbol;Acc:MGI:1195458]
Gnb4	ENSMUSG00000027669	-1.44372	1.00342e-10	guanine nucleotide binding protein (G protein), beta 4 [Source:MGI Symbol;Acc:MGI:104581]
Nop53	ENSMUSG00000041560	-0.513828	1.03697e-10	NOP53 ribosome biogenesis factor [Source:MGI Symbol;Acc:MGI:2154441]
Rab7b	ENSMUSG00000052688	-0.685751	1.05279e-10	RAB7B, member RAS oncogene family [Source:MGI Symbol;Acc:MGI:2442295]
Hacl1	ENSMUSG00000021884	-0.941865	1.0615e-10	2-hydroxyacyl-CoA lyase 1 [Source:MGI Symbol;Acc:MGI:1929657]
Dapk2	ENSMUSG00000032380	3.01922	1.13547e-10	death-associated protein kinase 2 [Source:MGI Symbol;Acc:MGI:1341297]	Yes
Tgfb2	ENSMUSG00000039239	0.869926	1.15633e-10	transforming growth factor, beta 2 [Source:MGI Symbol;Acc:MGI:98726]
Slc22a5	ENSMUSG00000018900	0.792705	1.18683e-10	solute carrier family 22 (organic cation transporter), member 5 [Source:MGI Symbol;Acc:MGI:1329012]
Aqp1	ENSMUSG00000004655	1.1371	1.22028e-10	aquaporin 1 [Source:MGI Symbol;Acc:MGI:103201]
Pcdhb5	ENSMUSG00000063687	1.07657	1.27411e-10	protocadherin beta 5 [Source:MGI Symbol;Acc:MGI:2136739]
Foxred2	ENSMUSG00000016552	-0.894098	1.37161e-10	FAD-dependent oxidoreductase domain containing 2 [Source:MGI Symbol;Acc:MGI:106315]
Mef2c	ENSMUSG00000005583	-1.25232	1.40257e-10	myocyte enhancer factor 2C [Source:MGI Symbol;Acc:MGI:99458]
Sec24d	ENSMUSG00000039234	0.573524	1.40982e-10	Sec24 related gene family, member D (S. cerevisiae) [Source:MGI Symbol;Acc:MGI:1916858]
Scn2a	ENSMUSG00000075318	-0.75604	1.43053e-10	sodium channel, voltage-gated, type II, alpha [Source:MGI Symbol;Acc:MGI:98248]
Paqr7	ENSMUSG00000037348	-0.820253	1.43341e-10	progestin and adipoQ receptor family member VII [Source:MGI Symbol;Acc:MGI:1919154]
C1qtnf2	ENSMUSG00000046491	-1.69448	1.50779e-10	C1q and tumor necrosis factor related protein 2 [Source:MGI Symbol;Acc:MGI:1916433]	Yes
Nkd2	ENSMUSG00000021567	-0.992885	1.50846e-10	naked cuticle 2 [Source:MGI Symbol;Acc:MGI:1919543]
Prcp	ENSMUSG00000061119	0.750621	1.51331e-10	prolylcarboxypeptidase (angiotensinase C) [Source:MGI Symbol;Acc:MGI:1919711]
Slc35b1	ENSMUSG00000020873	0.594704	1.5591e-10	solute carrier family 35, member B1 [Source:MGI Symbol;Acc:MGI:1343133]
Atp12a	ENSMUSG00000022229	2.97865	1.56113e-10	ATPase, H+/K+ transporting, nongastric, alpha polypeptide [Source:MGI Symbol;Acc:MGI:1926943]	Yes
Dut	ENSMUSG00000027203	0.819412	1.57846e-10	deoxyuridine triphosphatase [Source:MGI Symbol;Acc:MGI:1346051]
Entpd1	ENSMUSG00000048120	-1.56514	1.58253e-10	ectonucleoside triphosphate diphosphohydrolase 1 [Source:MGI Symbol;Acc:MGI:102805]	Yes
Acy3	ENSMUSG00000024866	-1.85225	1.59287e-10	aspartoacylase (aminoacylase) 3 [Source:MGI Symbol;Acc:MGI:1918920]	Yes
Cdh26	ENSMUSG00000039155	-2.10737	1.59287e-10	cadherin-like 26 [Source:MGI Symbol;Acc:MGI:2685856]	Yes
Cand2	ENSMUSG00000030319	-0.833812	1.60606e-10	cullin-associated and neddylation-dissociated 2 (putative) [Source:MGI Symbol;Acc:MGI:1914338]
Gzmc	ENSMUSG00000079186	2.44099	1.6623e-10	granzyme C [Source:MGI Symbol;Acc:MGI:109256]	Yes
P3h1	ENSMUSG00000028641	0.613888	1.67706e-10	prolyl 3-hydroxylase 1 [Source:MGI Symbol;Acc:MGI:1888921]
Fcgr2b	ENSMUSG00000026656	-1.01835	1.68069e-10	Fc receptor, IgG, low affinity IIb [Source:MGI Symbol;Acc:MGI:95499]
Adamtsl3	ENSMUSG00000070469	-0.824202	1.73121e-10	ADAMTS-like 3 [Source:MGI Symbol;Acc:MGI:3028499]
Hpgd	ENSMUSG00000031613	-1.51772	1.88725e-10	hydroxyprostaglandin dehydrogenase 15 (NAD) [Source:MGI Symbol;Acc:MGI:108085]	Yes
Esr1	ENSMUSG00000019768	2.05552	1.91414e-10	estrogen receptor 1 (alpha) [Source:MGI Symbol;Acc:MGI:1352467]	Yes
C2	ENSMUSG00000024371	-1.85512	1.9663e-10	complement component 2 (within H-2S) [Source:MGI Symbol;Acc:MGI:88226]	Yes
Fmo5	ENSMUSG00000028088	-0.828768	1.9663e-10	flavin containing monooxygenase 5 [Source:MGI Symbol;Acc:MGI:1310004]
Lrp6	ENSMUSG00000030201	0.466336	1.97234e-10	low density lipoprotein receptor-related protein 6 [Source:MGI Symbol;Acc:MGI:1298218]
Tmem68	ENSMUSG00000028232	0.66683	2.00983e-10	transmembrane protein 68 [Source:MGI Symbol;Acc:MGI:1919348]
Rhou	ENSMUSG00000039960	0.699289	2.11035e-10	ras homolog family member U [Source:MGI Symbol;Acc:MGI:1916831]
Ssr4	ENSMUSG00000002014	0.579277	2.17965e-10	signal sequence receptor, delta [Source:MGI Symbol;Acc:MGI:1099464]
Me1	ENSMUSG00000032418	0.568825	2.18409e-10	malic enzyme 1, NADP(+)-dependent, cytosolic [Source:MGI Symbol;Acc:MGI:97043]
Fgd4	ENSMUSG00000022788	-1.0135	2.19241e-10	FYVE, RhoGEF and PH domain containing 4 [Source:MGI Symbol;Acc:MGI:2183747]
Prdx2	ENSMUSG00000005161	0.44757	2.21961e-10	peroxiredoxin 2 [Source:MGI Symbol;Acc:MGI:109486]
Mmgt1	ENSMUSG00000061273	0.54783	2.23833e-10	membrane magnesium transporter 1 [Source:MGI Symbol;Acc:MGI:2384305]
Bcl6	ENSMUSG00000022508	0.551471	2.24571e-10	B cell leukemia/lymphoma 6 [Source:MGI Symbol;Acc:MGI:107187]
Chd3	ENSMUSG00000018474	0.90162	2.31266e-10	chromodomain helicase DNA binding protein 3 [Source:MGI Symbol;Acc:MGI:1344395]
Tln2	ENSMUSG00000052698	-0.870438	2.44919e-10	talin 2 [Source:MGI Symbol;Acc:MGI:1917799]
Lifr	ENSMUSG00000054263	-0.933905	2.46473e-10	LIF receptor alpha [Source:MGI Symbol;Acc:MGI:96788]
Ndst1	ENSMUSG00000054008	0.506055	2.48125e-10	N-deacetylase/N-sulfotransferase (heparan glucosaminyl) 1 [Source:MGI Symbol;Acc:MGI:104719]
Tinagl1	ENSMUSG00000028776	-1.7165	2.48222e-10	tubulointerstitial nephritis antigen-like 1 [Source:MGI Symbol;Acc:MGI:2137617]	Yes
Lgals3bp	ENSMUSG00000033880	-0.662676	2.65641e-10	lectin, galactoside-binding, soluble, 3 binding protein [Source:MGI Symbol;Acc:MGI:99554]
Dusp5	ENSMUSG00000034765	-1.49905	2.67076e-10	dual specificity phosphatase 5 [Source:MGI Symbol;Acc:MGI:2685183]
Dusp10	ENSMUSG00000039384	1.05378	2.75685e-10	dual specificity phosphatase 10 [Source:MGI Symbol;Acc:MGI:1927070]
Asxl1	ENSMUSG00000042548	-0.521886	2.77448e-10	ASXL transcriptional regulator 1 [Source:MGI Symbol;Acc:MGI:2684063]
Nacad	ENSMUSG00000041073	0.972462	2.82998e-10	NAC alpha domain containing [Source:MGI Symbol;Acc:MGI:3603030]
Rab27a	ENSMUSG00000032202	-2.13118	2.88436e-10	RAB27A, member RAS oncogene family [Source:MGI Symbol;Acc:MGI:1861441]	Yes
Tbx18	ENSMUSG00000032419	-0.851914	2.95134e-10	T-box18 [Source:MGI Symbol;Acc:MGI:1923615]
Dynlt1b	ENSMUSG00000096255	1.10654	3.01943e-10	dynein light chain Tctex-type 1B [Source:MGI Symbol;Acc:MGI:98643]
Mndal	ENSMUSG00000090272	-1.46238	3.21698e-10	myeloid nuclear differentiation antigen like [Source:MGI Symbol;Acc:MGI:3780953]
Peli3	ENSMUSG00000024901	-1.49413	3.26268e-10	pellino 3 [Source:MGI Symbol;Acc:MGI:1924963]
mt-Rnr1	ENSMUSG00000064337	-0.675342	3.367e-10	mitochondrially encoded 12S rRNA [Source:MGI Symbol;Acc:MGI:102493]
Ptgs2	ENSMUSG00000032487	1.38384	3.48501e-10	prostaglandin-endoperoxide synthase 2 [Source:MGI Symbol;Acc:MGI:97798]
Ssr3	ENSMUSG00000027828	0.573416	3.5661e-10	signal sequence receptor, gamma [Source:MGI Symbol;Acc:MGI:1914687]
Cers4	ENSMUSG00000008206	-0.835579	3.79499e-10	ceramide synthase 4 [Source:MGI Symbol;Acc:MGI:1914510]
Stat3	ENSMUSG00000004040	0.561034	3.90778e-10	signal transducer and activator of transcription 3 [Source:MGI Symbol;Acc:MGI:103038]
Atoh8	ENSMUSG00000037621	-0.940038	3.90778e-10	atonal bHLH transcription factor 8 [Source:MGI Symbol;Acc:MGI:1918343]
Tmem208	ENSMUSG00000014856	0.644745	3.9174e-10	transmembrane protein 208 [Source:MGI Symbol;Acc:MGI:1913570]
Mfap2	ENSMUSG00000060572	0.576295	3.97604e-10	microfibrillar-associated protein 2 [Source:MGI Symbol;Acc:MGI:99559]
Mmp19	ENSMUSG00000025355	1.00936	4.14091e-10	matrix metallopeptidase 19 [Source:MGI Symbol;Acc:MGI:1927899]
Itga8	ENSMUSG00000026768	2.43245	4.14091e-10	integrin alpha 8 [Source:MGI Symbol;Acc:MGI:109442]	Yes
Tspan4	ENSMUSG00000025511	-0.425135	4.15955e-10	tetraspanin 4 [Source:MGI Symbol;Acc:MGI:1928097]
Nkain3	ENSMUSG00000055761	2.60556	4.20735e-10	Na+/K+ transporting ATPase interacting 3 [Source:MGI Symbol;Acc:MGI:2444830]	Yes
Mfge8	ENSMUSG00000030605	-0.517729	4.37305e-10	milk fat globule EGF and factor V/VIII domain containing [Source:MGI Symbol;Acc:MGI:102768]
Pros1	ENSMUSG00000022912	-0.444755	4.47325e-10	protein S (alpha) [Source:MGI Symbol;Acc:MGI:1095733]
Kif16b	ENSMUSG00000038844	-0.58059	4.5004e-10	kinesin family member 16B [Source:MGI Symbol;Acc:MGI:1098240]
Enpp4	ENSMUSG00000023961	-1.07121	4.55888e-10	ectonucleotide pyrophosphatase/phosphodiesterase 4 [Source:MGI Symbol;Acc:MGI:2682634]
Enpp3	ENSMUSG00000019989	1.97119	4.69144e-10	ectonucleotide pyrophosphatase/phosphodiesterase 3 [Source:MGI Symbol;Acc:MGI:2143702]	Yes
Fam110a	ENSMUSG00000027459	-0.792381	4.70551e-10	family with sequence similarity 110, member A [Source:MGI Symbol;Acc:MGI:1921097]
Aff4	ENSMUSG00000049470	0.474139	4.71225e-10	AF4/FMR2 family, member 4 [Source:MGI Symbol;Acc:MGI:2136171]
Bicc1	ENSMUSG00000014329	-0.805937	4.74978e-10	BicC family RNA binding protein 1 [Source:MGI Symbol;Acc:MGI:1933388]
Arap2	ENSMUSG00000037999	-0.757132	4.9676e-10	ArfGAP with RhoGAP domain, ankyrin repeat and PH domain 2 [Source:MGI Symbol;Acc:MGI:2684416]
Rspo3	ENSMUSG00000019880	-0.920484	5.02467e-10	R-spondin 3 [Source:MGI Symbol;Acc:MGI:1920030]
Mrpl20	ENSMUSG00000029066	0.568024	5.0585e-10	mitochondrial ribosomal protein L20 [Source:MGI Symbol;Acc:MGI:2137221]
Trim47	ENSMUSG00000020773	-1.2057	5.32947e-10	tripartite motif-containing 47 [Source:MGI Symbol;Acc:MGI:1917374]
Pknox2	ENSMUSG00000035934	-1.41802	5.40345e-10	Pbx/knotted 1 homeobox 2 [Source:MGI Symbol;Acc:MGI:2445415]
Lancl1	ENSMUSG00000026000	-0.577459	5.50377e-10	LanC (bacterial lantibiotic synthetase component C)-like 1 [Source:MGI Symbol;Acc:MGI:1336997]
Eda2r	ENSMUSG00000034457	0.618531	5.54017e-10	ectodysplasin A2 receptor [Source:MGI Symbol;Acc:MGI:2442860]
Tfg	ENSMUSG00000022757	0.544121	5.5416e-10	Trk-fused gene [Source:MGI Symbol;Acc:MGI:1338041]
Cdk2ap1	ENSMUSG00000029394	0.569372	5.61089e-10	CDK2 (cyclin-dependent kinase 2)-associated protein 1 [Source:MGI Symbol;Acc:MGI:1202069]
Cst3	ENSMUSG00000027447	-0.514262	5.62343e-10	cystatin C [Source:MGI Symbol;Acc:MGI:102519]
Itgb5	ENSMUSG00000022817	-0.535373	5.67568e-10	integrin beta 5 [Source:MGI Symbol;Acc:MGI:96614]
Il20ra	ENSMUSG00000020007	1.56542	5.81448e-10	interleukin 20 receptor, alpha [Source:MGI Symbol;Acc:MGI:3605069]	Yes
Palmd	ENSMUSG00000033377	2.42786	6.03974e-10	palmdelphin [Source:MGI Symbol;Acc:MGI:2148896]	Yes
Bag2	ENSMUSG00000042215	0.996332	6.04819e-10	BCL2-associated athanogene 2 [Source:MGI Symbol;Acc:MGI:1891254]
Arsj	ENSMUSG00000046561	1.03259	6.0539e-10	arylsulfatase J [Source:MGI Symbol;Acc:MGI:2443513]
Naga	ENSMUSG00000022453	-0.553492	6.13512e-10	N-acetyl galactosaminidase, alpha [Source:MGI Symbol;Acc:MGI:1261422]
Rffl	ENSMUSG00000020696	-0.985579	6.19171e-10	ring finger and FYVE like domain containing protein [Source:MGI Symbol;Acc:MGI:1914588]
Kif13b	ENSMUSG00000060012	0.75225	6.22624e-10	kinesin family member 13B [Source:MGI Symbol;Acc:MGI:1098265]
Cd81	ENSMUSG00000037706	0.482427	6.23851e-10	CD81 antigen [Source:MGI Symbol;Acc:MGI:1096398]
Pkd2	ENSMUSG00000034462	-0.511412	6.25321e-10	polycystin 2, transient receptor potential cation channel [Source:MGI Symbol;Acc:MGI:1099818]
Nmb	ENSMUSG00000025723	1.74086	6.31052e-10	neuromedin B [Source:MGI Symbol;Acc:MGI:1915289]	Yes
Mmp11	ENSMUSG00000000901	-0.880631	6.37901e-10	matrix metallopeptidase 11 [Source:MGI Symbol;Acc:MGI:97008]
Etv1	ENSMUSG00000004151	0.725606	6.57546e-10	ets variant 1 [Source:MGI Symbol;Acc:MGI:99254]
Mid2	ENSMUSG00000000266	-0.766675	6.59417e-10	midline 2 [Source:MGI Symbol;Acc:MGI:1344333]
Tmem106a	ENSMUSG00000034947	-1.16447	6.65345e-10	transmembrane protein 106A [Source:MGI Symbol;Acc:MGI:1922056]
Cpeb1	ENSMUSG00000025586	-0.709973	6.70297e-10	cytoplasmic polyadenylation element binding protein 1 [Source:MGI Symbol;Acc:MGI:108442]
Arsi	ENSMUSG00000036412	0.747619	6.7852e-10	arylsulfatase i [Source:MGI Symbol;Acc:MGI:2670959]
Aebp1	ENSMUSG00000020473	-0.651892	7.25704e-10	AE binding protein 1 [Source:MGI Symbol;Acc:MGI:1197012]
Icam1	ENSMUSG00000037405	-0.863271	7.36119e-10	intercellular adhesion molecule 1 [Source:MGI Symbol;Acc:MGI:96392]
Pofut2	ENSMUSG00000020260	0.57887	7.4324e-10	protein O-fucosyltransferase 2 [Source:MGI Symbol;Acc:MGI:1916863]
Phka1	ENSMUSG00000034055	0.690718	7.46235e-10	phosphorylase kinase alpha 1 [Source:MGI Symbol;Acc:MGI:97576]
Ppfibp2	ENSMUSG00000036528	-1.52075	7.74323e-10	PTPRF interacting protein, binding protein 2 (liprin beta 2) [Source:MGI Symbol;Acc:MGI:894649]	Yes
Lbh	ENSMUSG00000024063	-2.12799	7.74739e-10	limb-bud and heart [Source:MGI Symbol;Acc:MGI:1925139]	Yes
Tmem132a	ENSMUSG00000024736	0.734254	7.84592e-10	transmembrane protein 132A [Source:MGI Symbol;Acc:MGI:2147810]
Ankrd34a	ENSMUSG00000049097	-2.58557	7.84592e-10	ankyrin repeat domain 34A [Source:MGI Symbol;Acc:MGI:3617846]	Yes
Hes1	ENSMUSG00000022528	1.8013	8.37606e-10	hes family bHLH transcription factor 1 [Source:MGI Symbol;Acc:MGI:104853]	Yes
Bpnt2	ENSMUSG00000066324	0.407973	8.48164e-10	3'(2'), 5'-bisphosphate nucleotidase 2 [Source:MGI Symbol;Acc:MGI:1915720]
Mlana	ENSMUSG00000024806	-6.08228	8.50297e-10	melan-A [Source:MGI Symbol;Acc:MGI:108454]	Yes
Ganab	ENSMUSG00000071650	0.433954	8.54633e-10	alpha glucosidase 2 alpha neutral subunit [Source:MGI Symbol;Acc:MGI:1097667]
Hacd3	ENSMUSG00000033629	0.613201	9.16883e-10	3-hydroxyacyl-CoA dehydratase 3 [Source:MGI Symbol;Acc:MGI:1889341]
Higd2a	ENSMUSG00000025868	0.522983	9.28261e-10	HIG1 domain family, member 2A [Source:MGI Symbol;Acc:MGI:1914294]
Pdpn	ENSMUSG00000028583	0.970449	9.45633e-10	podoplanin [Source:MGI Symbol;Acc:MGI:103098]
Erp29	ENSMUSG00000029616	0.674717	9.48294e-10	endoplasmic reticulum protein 29 [Source:MGI Symbol;Acc:MGI:1914647]
Timm8b	ENSMUSG00000039016	0.606415	9.51202e-10	translocase of inner mitochondrial membrane 8B [Source:MGI Symbol;Acc:MGI:1353424]
B3galt1	ENSMUSG00000034780	1.50708	9.63408e-10	UDP-Gal:betaGlcNAc beta 1,3-galactosyltransferase, polypeptide 1 [Source:MGI Symbol;Acc:MGI:1349403]	Yes
Dad1	ENSMUSG00000022174	0.496723	9.69494e-10	defender against cell death 1 [Source:MGI Symbol;Acc:MGI:101912]
Rbpj	ENSMUSG00000039191	-0.617255	9.79017e-10	recombination signal binding protein for immunoglobulin kappa J region [Source:MGI Symbol;Acc:MGI:96522]
ENSMUSG00000108658	ENSMUSG00000108658	-1.43036	9.83232e-10	NA
Fkbp14	ENSMUSG00000038074	0.53323	1.01189e-09	FK506 binding protein 14 [Source:MGI Symbol;Acc:MGI:2387639]
Tmem44	ENSMUSG00000022537	-1.71556	1.01191e-09	transmembrane protein 44 [Source:MGI Symbol;Acc:MGI:1924489]	Yes
Siva1	ENSMUSG00000064326	-0.538158	1.01603e-09	SIVA1, apoptosis-inducing factor [Source:MGI Symbol;Acc:MGI:1353606]
Bnc2	ENSMUSG00000028487	0.871484	1.02697e-09	basonuclin 2 [Source:MGI Symbol;Acc:MGI:2443805]
Snx10	ENSMUSG00000038301	0.673411	1.04264e-09	sorting nexin 10 [Source:MGI Symbol;Acc:MGI:1919232]
Mme	ENSMUSG00000027820	-0.879754	1.05511e-09	membrane metallo endopeptidase [Source:MGI Symbol;Acc:MGI:97004]
Dlk1	ENSMUSG00000040856	-3.76827	1.08267e-09	delta like non-canonical Notch ligand 1 [Source:MGI Symbol;Acc:MGI:94900]	Yes
Nptxr	ENSMUSG00000022421	-1.06169	1.14675e-09	neuronal pentraxin receptor [Source:MGI Symbol;Acc:MGI:1920590]
Id2	ENSMUSG00000020644	-0.839715	1.15246e-09	inhibitor of DNA binding 2 [Source:MGI Symbol;Acc:MGI:96397]
Cmip	ENSMUSG00000034390	0.654036	1.17454e-09	c-Maf inducing protein [Source:MGI Symbol;Acc:MGI:1921690]
Pla1a	ENSMUSG00000002847	-1.45049	1.18174e-09	phospholipase A1 member A [Source:MGI Symbol;Acc:MGI:1934677]
Fhl2	ENSMUSG00000008136	-1.00295	1.1978e-09	four and a half LIM domains 2 [Source:MGI Symbol;Acc:MGI:1338762]
Jpt1	ENSMUSG00000020737	0.530571	1.19789e-09	Jupiter microtubule associated homolog 1 [Source:MGI Symbol;Acc:MGI:1096361]
Rbl2	ENSMUSG00000031666	-0.475214	1.20305e-09	RB transcriptional corepressor like 2 [Source:MGI Symbol;Acc:MGI:105085]
Vcl	ENSMUSG00000021823	-0.781768	1.20913e-09	vinculin [Source:MGI Symbol;Acc:MGI:98927]
Tcaf2	ENSMUSG00000029851	-0.763647	1.22746e-09	TRPM8 channel-associated factor 2 [Source:MGI Symbol;Acc:MGI:2385258]
Ttc3	ENSMUSG00000040785	-0.456493	1.24634e-09	tetratricopeptide repeat domain 3 [Source:MGI Symbol;Acc:MGI:1276539]
Actr1b	ENSMUSG00000037351	0.5074	1.26359e-09	ARP1 actin-related protein 1B, centractin beta [Source:MGI Symbol;Acc:MGI:1917446]
P2rx5	ENSMUSG00000005950	-2.12486	1.26515e-09	purinergic receptor P2X, ligand-gated ion channel, 5 [Source:MGI Symbol;Acc:MGI:2137026]	Yes
Eif4e	ENSMUSG00000028156	0.445599	1.30536e-09	eukaryotic translation initiation factor 4E [Source:MGI Symbol;Acc:MGI:95305]
Yaf2	ENSMUSG00000022634	0.707863	1.3294e-09	YY1 associated factor 2 [Source:MGI Symbol;Acc:MGI:1914307]
Pgk1	ENSMUSG00000062070	0.497326	1.34097e-09	phosphoglycerate kinase 1 [Source:MGI Symbol;Acc:MGI:97555]
Fndc5	ENSMUSG00000001334	-1.94157	1.45293e-09	fibronectin type III domain containing 5 [Source:MGI Symbol;Acc:MGI:1917614]	Yes
Crim1	ENSMUSG00000024074	-0.667829	1.47088e-09	cysteine rich transmembrane BMP regulator 1 (chordin like) [Source:MGI Symbol;Acc:MGI:1354756]
Anks1b	ENSMUSG00000058589	-1.58196	1.51046e-09	ankyrin repeat and sterile alpha motif domain containing 1B [Source:MGI Symbol;Acc:MGI:1924781]	Yes
Rragd	ENSMUSG00000028278	-1.78645	1.56513e-09	Ras-related GTP binding D [Source:MGI Symbol;Acc:MGI:1098604]	Yes
Gspt1	ENSMUSG00000062203	0.4177	1.57695e-09	G1 to S phase transition 1 [Source:MGI Symbol;Acc:MGI:1316728]
Sat1	ENSMUSG00000025283	0.499158	1.59264e-09	spermidine/spermine N1-acetyl transferase 1 [Source:MGI Symbol;Acc:MGI:98233]
Ppfibp1	ENSMUSG00000016487	-0.765412	1.67252e-09	PTPRF interacting protein, binding protein 1 (liprin beta 1) [Source:MGI Symbol;Acc:MGI:1914783]
Morf4l2	ENSMUSG00000031422	0.510674	1.67252e-09	mortality factor 4 like 2 [Source:MGI Symbol;Acc:MGI:1927167]
Gprasp1	ENSMUSG00000043384	-0.787844	1.70541e-09	G protein-coupled receptor associated sorting protein 1 [Source:MGI Symbol;Acc:MGI:1917418]
D630003M21Rik	ENSMUSG00000037813	-2.02057	1.73326e-09	RIKEN cDNA D630003M21 gene [Source:MGI Symbol;Acc:MGI:3606579]	Yes
Svil	ENSMUSG00000024236	0.667179	1.75611e-09	supervillin [Source:MGI Symbol;Acc:MGI:2147319]
Gm17501	ENSMUSG00000097183	-1.35544	1.80023e-09	predicted gene, 17501 [Source:MGI Symbol;Acc:MGI:4937135]
Lgals3	ENSMUSG00000050335	-1.13483	1.81137e-09	lectin, galactose binding, soluble 3 [Source:MGI Symbol;Acc:MGI:96778]
Emilin1	ENSMUSG00000029163	0.551338	1.81766e-09	elastin microfibril interfacer 1 [Source:MGI Symbol;Acc:MGI:1926189]
Chrna7	ENSMUSG00000030525	2.04588	1.85407e-09	cholinergic receptor, nicotinic, alpha polypeptide 7 [Source:MGI Symbol;Acc:MGI:99779]	Yes
Prnp	ENSMUSG00000079037	-0.396768	1.86777e-09	prion protein [Source:MGI Symbol;Acc:MGI:97769]
Scrn1	ENSMUSG00000019124	-1.03166	1.91152e-09	secernin 1 [Source:MGI Symbol;Acc:MGI:1917188]
Nat8	ENSMUSG00000030004	2.33864	1.94737e-09	N-acetyltransferase 8 (GCN5-related) [Source:MGI Symbol;Acc:MGI:1915646]	Yes
Susd2	ENSMUSG00000006342	-2.47036	1.99521e-09	sushi domain containing 2 [Source:MGI Symbol;Acc:MGI:1918983]	Yes
Synpo2	ENSMUSG00000050315	1.01918	2.02147e-09	synaptopodin 2 [Source:MGI Symbol;Acc:MGI:2153070]
Zfp521	ENSMUSG00000024420	-0.687373	2.06173e-09	zinc finger protein 521 [Source:MGI Symbol;Acc:MGI:95459]
Pkm	ENSMUSG00000032294	0.588302	2.07478e-09	pyruvate kinase, muscle [Source:MGI Symbol;Acc:MGI:97591]
Eif3f	ENSMUSG00000031029	-0.526541	2.17152e-09	eukaryotic translation initiation factor 3, subunit F [Source:MGI Symbol;Acc:MGI:1913335]
Nomo1	ENSMUSG00000030835	0.534721	2.22344e-09	nodal modulator 1 [Source:MGI Symbol;Acc:MGI:2385850]
Rpl22l1	ENSMUSG00000039221	-0.65496	2.22387e-09	ribosomal protein L22 like 1 [Source:MGI Symbol;Acc:MGI:1915278]
Wdr66	ENSMUSG00000029442	-1.31321	2.22471e-09	WD repeat domain 66 [Source:MGI Symbol;Acc:MGI:1918495]
Kdelr3	ENSMUSG00000010830	0.578174	2.22829e-09	KDEL (Lys-Asp-Glu-Leu) endoplasmic reticulum protein retention receptor 3 [Source:MGI Symbol;Acc:MGI:2145953]
Plaat1	ENSMUSG00000022525	-2.99502	2.22829e-09	phospholipase A and acyltransferase 1 [Source:MGI Symbol;Acc:MGI:1351473]	Yes
Klhl42	ENSMUSG00000040102	0.804488	2.22829e-09	kelch-like 42 [Source:MGI Symbol;Acc:MGI:2444786]
Gas2	ENSMUSG00000030498	-1.29665	2.24918e-09	growth arrest specific 2 [Source:MGI Symbol;Acc:MGI:95657]
Jmjd1c	ENSMUSG00000037876	0.534306	2.26882e-09	jumonji domain containing 1C [Source:MGI Symbol;Acc:MGI:1918614]
Ntrk3	ENSMUSG00000059146	-1.32736	2.31879e-09	neurotrophic tyrosine kinase, receptor, type 3 [Source:MGI Symbol;Acc:MGI:97385]
Ntrk3-1	ENSMUSG00000059146	-1.32736	2.31879e-09	neurotrophic tyrosine kinase, receptor, type 3 [Source:MGI Symbol;Acc:MGI:97385]
Tm2d2	ENSMUSG00000031556	0.498811	2.39135e-09	TM2 domain containing 2 [Source:MGI Symbol;Acc:MGI:1916992]
Ggta1	ENSMUSG00000035778	-0.598986	2.56716e-09	glycoprotein galactosyltransferase alpha 1, 3 [Source:MGI Symbol;Acc:MGI:95704]
Myo10	ENSMUSG00000022272	-0.747927	2.59278e-09	myosin X [Source:MGI Symbol;Acc:MGI:107716]
Gm43672	ENSMUSG00000106019	-1.30864	2.62352e-09	predicted gene 43672 [Source:MGI Symbol;Acc:MGI:5663809]
Ermp1	ENSMUSG00000046324	0.561464	2.63991e-09	endoplasmic reticulum metallopeptidase 1 [Source:MGI Symbol;Acc:MGI:106250]
Cyp7b1	ENSMUSG00000039519	-0.846871	2.64587e-09	cytochrome P450, family 7, subfamily b, polypeptide 1 [Source:MGI Symbol;Acc:MGI:104978]
Celf5	ENSMUSG00000034818	-0.926838	2.68124e-09	CUGBP, Elav-like family member 5 [Source:MGI Symbol;Acc:MGI:2442333]
Ifitm1	ENSMUSG00000025491	-1.90149	2.70983e-09	interferon induced transmembrane protein 1 [Source:MGI Symbol;Acc:MGI:1915963]	Yes
Pth1r	ENSMUSG00000032492	-0.560023	2.75824e-09	parathyroid hormone 1 receptor [Source:MGI Symbol;Acc:MGI:97801]
Tmem8b	ENSMUSG00000078716	-1.2478	2.88439e-09	transmembrane protein 8B [Source:MGI Symbol;Acc:MGI:2441680]
Bcor	ENSMUSG00000040363	0.612373	3.00548e-09	BCL6 interacting corepressor [Source:MGI Symbol;Acc:MGI:1918708]
Txnip	ENSMUSG00000038393	-2.8779	3.04274e-09	thioredoxin interacting protein [Source:MGI Symbol;Acc:MGI:1889549]	Yes
Hnrnpab	ENSMUSG00000020358	0.469964	3.08117e-09	heterogeneous nuclear ribonucleoprotein A/B [Source:MGI Symbol;Acc:MGI:1330294]
Cdc42ep1	ENSMUSG00000049521	-0.580798	3.09023e-09	CDC42 effector protein (Rho GTPase binding) 1 [Source:MGI Symbol;Acc:MGI:1929763]
Hebp2	ENSMUSG00000019853	-0.908915	3.26956e-09	heme binding protein 2 [Source:MGI Symbol;Acc:MGI:1860084]
Meox2	ENSMUSG00000036144	-0.774641	3.51799e-09	mesenchyme homeobox 2 [Source:MGI Symbol;Acc:MGI:103219]
Nt5dc2	ENSMUSG00000071547	1.00395	3.51822e-09	5'-nucleotidase domain containing 2 [Source:MGI Symbol;Acc:MGI:1917271]
Usp11	ENSMUSG00000031066	-0.807584	3.5874e-09	ubiquitin specific peptidase 11 [Source:MGI Symbol;Acc:MGI:2384312]
Zeb2	ENSMUSG00000026872	-0.470479	3.61313e-09	zinc finger E-box binding homeobox 2 [Source:MGI Symbol;Acc:MGI:1344407]
Sox11	ENSMUSG00000063632	2.20728	3.63328e-09	SRY (sex determining region Y)-box 11 [Source:MGI Symbol;Acc:MGI:98359]	Yes
Ccdc47	ENSMUSG00000078622	0.493755	3.74987e-09	coiled-coil domain containing 47 [Source:MGI Symbol;Acc:MGI:1914413]
Ctso	ENSMUSG00000028015	-0.554426	3.76207e-09	cathepsin O [Source:MGI Symbol;Acc:MGI:2139628]
Tmem205	ENSMUSG00000040883	0.596774	3.80414e-09	transmembrane protein 205 [Source:MGI Symbol;Acc:MGI:3045495]
Sec23b	ENSMUSG00000027429	0.46766	3.85604e-09	SEC23 homolog B, COPII coat complex component [Source:MGI Symbol;Acc:MGI:1350925]
Tceal3	ENSMUSG00000044550	-1.32328	3.86642e-09	transcription elongation factor A (SII)-like 3 [Source:MGI Symbol;Acc:MGI:1913354]
Mdga1	ENSMUSG00000043557	-0.938689	3.88708e-09	MAM domain containing glycosylphosphatidylinositol anchor 1 [Source:MGI Symbol;Acc:MGI:1922012]
Vsig10l	ENSMUSG00000070604	-1.38723	3.92539e-09	V-set and immunoglobulin domain containing 10 like [Source:MGI Symbol;Acc:MGI:1922940]
Tssc4	ENSMUSG00000045752	0.572651	4.00565e-09	tumor-suppressing subchromosomal transferable fragment 4 [Source:MGI Symbol;Acc:MGI:1861712]
Pi15	ENSMUSG00000067780	1.16031	4.00565e-09	peptidase inhibitor 15 [Source:MGI Symbol;Acc:MGI:1934659]
Kank2	ENSMUSG00000032194	-0.490287	4.06616e-09	KN motif and ankyrin repeat domains 2 [Source:MGI Symbol;Acc:MGI:2384568]
Arxes2	ENSMUSG00000048040	0.945397	4.07274e-09	adipocyte-related X-chromosome expressed sequence 2 [Source:MGI Symbol;Acc:MGI:1924226]
Atp2a2	ENSMUSG00000029467	0.520763	4.31887e-09	ATPase, Ca++ transporting, cardiac muscle, slow twitch 2 [Source:MGI Symbol;Acc:MGI:88110]
Sdk1	ENSMUSG00000039683	1.14224	4.3191e-09	sidekick cell adhesion molecule 1 [Source:MGI Symbol;Acc:MGI:2444413]
Pomgnt1	ENSMUSG00000028700	0.461291	4.33538e-09	protein O-linked mannose beta 1,2-N-acetylglucosaminyltransferase [Source:MGI Symbol;Acc:MGI:1915523]
Pomgnt1-1	ENSMUSG00000028700	0.461291	4.33538e-09	protein O-linked mannose beta 1,2-N-acetylglucosaminyltransferase [Source:MGI Symbol;Acc:MGI:1915523]
Ccl11	ENSMUSG00000020676	1.51458	4.3505e-09	chemokine (C-C motif) ligand 11 [Source:MGI Symbol;Acc:MGI:103576]	Yes
Il1rl1	ENSMUSG00000026069	1.09934	4.44255e-09	interleukin 1 receptor-like 1 [Source:MGI Symbol;Acc:MGI:98427]
Nenf	ENSMUSG00000037499	-0.434993	4.48537e-09	neuron derived neurotrophic factor [Source:MGI Symbol;Acc:MGI:1913458]
Fhl1	ENSMUSG00000023092	1.19211	4.55298e-09	four and a half LIM domains 1 [Source:MGI Symbol;Acc:MGI:1298387]
Lig4	ENSMUSG00000049717	0.707015	4.60853e-09	ligase IV, DNA, ATP-dependent [Source:MGI Symbol;Acc:MGI:1335098]
Arhgap6	ENSMUSG00000031355	-1.96204	4.61685e-09	Rho GTPase activating protein 6 [Source:MGI Symbol;Acc:MGI:1196332]	Yes
Nlrc3	ENSMUSG00000049871	-1.60444	4.659e-09	NLR family, CARD domain containing 3 [Source:MGI Symbol;Acc:MGI:2444070]	Yes
Nsd2	ENSMUSG00000057406	0.646461	4.68819e-09	nuclear receptor binding SET domain protein 2 [Source:MGI Symbol;Acc:MGI:1276574]
Pcdhb9	ENSMUSG00000051242	1.35147	4.7084e-09	protocadherin beta 9 [Source:MGI Symbol;Acc:MGI:2136744]
Gm20559	ENSMUSG00000106734	-0.788212	4.7084e-09	predicted gene, 20559 [Source:MGI Symbol;Acc:MGI:5295666]
Prelid3b	ENSMUSG00000016257	0.531292	4.85795e-09	PRELI domain containing 3B [Source:MGI Symbol;Acc:MGI:1913640]
Bhlhe41	ENSMUSG00000030256	-1.10084	4.90208e-09	basic helix-loop-helix family, member e41 [Source:MGI Symbol;Acc:MGI:1930704]
Clmp	ENSMUSG00000032024	0.644997	4.9914e-09	CXADR-like membrane protein [Source:MGI Symbol;Acc:MGI:1918816]
Slc1a4	ENSMUSG00000020142	0.986174	5.1262e-09	solute carrier family 1 (glutamate/neutral amino acid transporter), member 4 [Source:MGI Symbol;Acc:MGI:2135601]
Dnajc15	ENSMUSG00000022013	0.715965	5.21515e-09	DnaJ heat shock protein family (Hsp40) member C15 [Source:MGI Symbol;Acc:MGI:1913398]
Runx1t1	ENSMUSG00000006586	-1.44642	5.30666e-09	RUNX1 translocation partner 1 [Source:MGI Symbol;Acc:MGI:104793]
Ubqln2	ENSMUSG00000050148	0.555563	5.35247e-09	ubiquilin 2 [Source:MGI Symbol;Acc:MGI:1860283]
Znhit6	ENSMUSG00000074182	-0.905887	5.35918e-09	zinc finger, HIT type 6 [Source:MGI Symbol;Acc:MGI:1916996]
Bdnf	ENSMUSG00000048482	1.08967	5.36632e-09	brain derived neurotrophic factor [Source:MGI Symbol;Acc:MGI:88145]
Ak2	ENSMUSG00000028792	0.567701	5.41254e-09	adenylate kinase 2 [Source:MGI Symbol;Acc:MGI:87978]
Mtch1	ENSMUSG00000024012	0.608224	5.46551e-09	mitochondrial carrier 1 [Source:MGI Symbol;Acc:MGI:1929261]
Ephb6	ENSMUSG00000029869	-1.1289	5.5752e-09	Eph receptor B6 [Source:MGI Symbol;Acc:MGI:1096338]
Gzme	ENSMUSG00000022156	1.29454	5.8298e-09	granzyme E [Source:MGI Symbol;Acc:MGI:109265]
Snhg11	ENSMUSG00000044349	-0.870798	5.89521e-09	small nucleolar RNA host gene 11 [Source:MGI Symbol;Acc:MGI:2441845]
Slc9b2	ENSMUSG00000037994	1.69388	5.99772e-09	solute carrier family 9, subfamily B (NHA2, cation proton antiporter 2), member 2 [Source:MGI Symbol;Acc:MGI:2140077]	Yes
Sdc1	ENSMUSG00000020592	0.47762	6.18706e-09	syndecan 1 [Source:MGI Symbol;Acc:MGI:1349162]
Dcun1d5	ENSMUSG00000032002	0.662963	6.25052e-09	DCN1, defective in cullin neddylation 1, domain containing 5 (S. cerevisiae) [Source:MGI Symbol;Acc:MGI:1924113]
Sidt2	ENSMUSG00000034908	0.520866	6.25052e-09	SID1 transmembrane family, member 2 [Source:MGI Symbol;Acc:MGI:2446134]
F3	ENSMUSG00000028128	-1.15881	6.42496e-09	coagulation factor III [Source:MGI Symbol;Acc:MGI:88381]
Grb10	ENSMUSG00000020176	0.63638	6.77669e-09	growth factor receptor bound protein 10 [Source:MGI Symbol;Acc:MGI:103232]
Gpc4	ENSMUSG00000031119	-0.513483	6.84031e-09	glypican 4 [Source:MGI Symbol;Acc:MGI:104902]
Ptk2b	ENSMUSG00000059456	-1.09772	6.89427e-09	PTK2 protein tyrosine kinase 2 beta [Source:MGI Symbol;Acc:MGI:104908]
Ppp3ca	ENSMUSG00000028161	0.663561	7.07804e-09	protein phosphatase 3, catalytic subunit, alpha isoform [Source:MGI Symbol;Acc:MGI:107164]
Hacd1	ENSMUSG00000063275	0.809747	7.106e-09	3-hydroxyacyl-CoA dehydratase 1 [Source:MGI Symbol;Acc:MGI:1353592]
Pi4k2b	ENSMUSG00000029186	0.71912	7.15669e-09	phosphatidylinositol 4-kinase type 2 beta [Source:MGI Symbol;Acc:MGI:1914323]
Gpha2	ENSMUSG00000024784	2.93249	7.23373e-09	glycoprotein hormone alpha 2 [Source:MGI Symbol;Acc:MGI:2156541]	Yes
Ndufa4	ENSMUSG00000029632	0.452525	7.23373e-09	Ndufa4, mitochondrial complex associated [Source:MGI Symbol;Acc:MGI:107686]
Adgra3	ENSMUSG00000029090	0.557418	7.23591e-09	adhesion G protein-coupled receptor A3 [Source:MGI Symbol;Acc:MGI:1917943]
Utrn	ENSMUSG00000019820	-0.471127	7.33353e-09	utrophin [Source:MGI Symbol;Acc:MGI:104631]
mt-Nd2	ENSMUSG00000064345	0.681983	7.53186e-09	mitochondrially encoded NADH dehydrogenase 2 [Source:MGI Symbol;Acc:MGI:102500]
Aph1c	ENSMUSG00000053040	-1.19618	7.57346e-09	aph1 homolog C, gamma secretase subunit [Source:MGI Symbol;Acc:MGI:1915568]
Trnp1	ENSMUSG00000056596	-1.12593	7.61463e-09	TMF1-regulated nuclear protein 1 [Source:MGI Symbol;Acc:MGI:1916789]
Sertad4	ENSMUSG00000016262	0.810749	7.62407e-09	SERTA domain containing 4 [Source:MGI Symbol;Acc:MGI:2443496]
Cyp26b1	ENSMUSG00000063415	-2.80402	7.75808e-09	cytochrome P450, family 26, subfamily b, polypeptide 1 [Source:MGI Symbol;Acc:MGI:2176159]	Yes
Pgpep1l	ENSMUSG00000030553	1.9941	7.7723e-09	pyroglutamyl-peptidase I-like [Source:MGI Symbol;Acc:MGI:1925694]	Yes
Tmcc2	ENSMUSG00000042066	0.700204	7.99012e-09	transmembrane and coiled-coil domains 2 [Source:MGI Symbol;Acc:MGI:1916125]
Mpdu1	ENSMUSG00000018761	0.52585	8.13062e-09	mannose-P-dolichol utilization defect 1 [Source:MGI Symbol;Acc:MGI:1346040]
Txndc16	ENSMUSG00000021830	-0.547036	8.15675e-09	thioredoxin domain containing 16 [Source:MGI Symbol;Acc:MGI:1917811]
Dtd1	ENSMUSG00000027430	-0.830268	8.17021e-09	D-tyrosyl-tRNA deacylase 1 [Source:MGI Symbol;Acc:MGI:1913294]
Igbp1	ENSMUSG00000031221	-0.469136	8.23425e-09	immunoglobulin (CD79A) binding protein 1 [Source:MGI Symbol;Acc:MGI:1346500]
Scn7a	ENSMUSG00000034810	-2.79083	8.23425e-09	sodium channel, voltage-gated, type VII, alpha [Source:MGI Symbol;Acc:MGI:102965]	Yes
Scin	ENSMUSG00000002565	2.77377	8.25068e-09	scinderin [Source:MGI Symbol;Acc:MGI:1306794]	Yes
Tmed9	ENSMUSG00000058569	0.458374	8.49334e-09	transmembrane p24 trafficking protein 9 [Source:MGI Symbol;Acc:MGI:1914761]
C1s2	ENSMUSG00000079343	-1.32956	8.56197e-09	complement component 1, s subcomponent 2 [Source:MGI Symbol;Acc:MGI:3644269]
Dixdc1	ENSMUSG00000032064	-0.957563	8.67139e-09	DIX domain containing 1 [Source:MGI Symbol;Acc:MGI:2679721]
Nipal3	ENSMUSG00000028803	-1.00778	8.7699e-09	NIPA-like domain containing 3 [Source:MGI Symbol;Acc:MGI:1921802]
Man1a	ENSMUSG00000003746	0.756515	8.98153e-09	mannosidase 1, alpha [Source:MGI Symbol;Acc:MGI:104677]
Smox	ENSMUSG00000027333	0.725823	9.23777e-09	spermine oxidase [Source:MGI Symbol;Acc:MGI:2445356]
Clip4	ENSMUSG00000024059	0.664661	9.44738e-09	CAP-GLY domain containing linker protein family, member 4 [Source:MGI Symbol;Acc:MGI:1919100]
Gm8399	ENSMUSG00000043889	0.784867	9.44738e-09	predicted gene 8399 [Source:MGI Symbol;Acc:MGI:3647971]
Pbk	ENSMUSG00000022033	1.34276	9.69677e-09	PDZ binding kinase [Source:MGI Symbol;Acc:MGI:1289156]
Pdha1	ENSMUSG00000031299	0.816687	9.92558e-09	pyruvate dehydrogenase E1 alpha 1 [Source:MGI Symbol;Acc:MGI:97532]
Sntb1	ENSMUSG00000060429	1.25006	1.00993e-08	syntrophin, basic 1 [Source:MGI Symbol;Acc:MGI:101781]
Chordc1	ENSMUSG00000001774	0.458918	1.01495e-08	cysteine and histidine-rich domain (CHORD)-containing, zinc-binding protein 1 [Source:MGI Symbol;Acc:MGI:1914167]
Rassf2	ENSMUSG00000027339	0.721869	1.01569e-08	Ras association (RalGDS/AF-6) domain family member 2 [Source:MGI Symbol;Acc:MGI:2442060]
Cap2	ENSMUSG00000021373	-1.43349	1.01726e-08	CAP, adenylate cyclase-associated protein, 2 (yeast) [Source:MGI Symbol;Acc:MGI:1914502]
Tef	ENSMUSG00000022389	-0.463713	1.02567e-08	thyrotroph embryonic factor [Source:MGI Symbol;Acc:MGI:98663]
Reep3	ENSMUSG00000019873	0.430701	1.05715e-08	receptor accessory protein 3 [Source:MGI Symbol;Acc:MGI:88930]
Tgfbi	ENSMUSG00000035493	2.66199	1.05715e-08	transforming growth factor, beta induced [Source:MGI Symbol;Acc:MGI:99959]	Yes
Plekhg6	ENSMUSG00000038167	-2.74597	1.05715e-08	pleckstrin homology domain containing, family G (with RhoGef domain) member 6 [Source:MGI Symbol;Acc:MGI:2682298]	Yes
Pvr	ENSMUSG00000040511	0.895074	1.08487e-08	poliovirus receptor [Source:MGI Symbol;Acc:MGI:107741]
Tcf7l2	ENSMUSG00000024985	-0.747507	1.10286e-08	transcription factor 7 like 2, T cell specific, HMG box [Source:MGI Symbol;Acc:MGI:1202879]
Fam180a	ENSMUSG00000047420	-2.5746	1.11202e-08	family with sequence similarity 180, member A [Source:MGI Symbol;Acc:MGI:3039626]	Yes
Csnk1a1	ENSMUSG00000024576	0.378786	1.11529e-08	casein kinase 1, alpha 1 [Source:MGI Symbol;Acc:MGI:1934950]
Mapk6	ENSMUSG00000042688	0.485795	1.13351e-08	mitogen-activated protein kinase 6 [Source:MGI Symbol;Acc:MGI:1354946]
Gm7809	ENSMUSG00000099397	1.02969	1.1455e-08	predicted gene 7809 [Source:MGI Symbol;Acc:MGI:3643362]
Cdo1	ENSMUSG00000033022	-2.39245	1.15602e-08	cysteine dioxygenase 1, cytosolic [Source:MGI Symbol;Acc:MGI:105925]	Yes
As3mt	ENSMUSG00000003559	-1.23513	1.18434e-08	arsenite methyltransferase [Source:MGI Symbol;Acc:MGI:1929882]
Speg	ENSMUSG00000026207	-0.881045	1.18434e-08	SPEG complex locus [Source:MGI Symbol;Acc:MGI:109282]
Cxcl5	ENSMUSG00000029371	-0.729865	1.18434e-08	chemokine (C-X-C motif) ligand 5 [Source:MGI Symbol;Acc:MGI:1096868]
Zfr2	ENSMUSG00000034949	-1.07959	1.18434e-08	zinc finger RNA binding protein 2 [Source:MGI Symbol;Acc:MGI:2143792]
Ocstamp	ENSMUSG00000027670	2.87043	1.18638e-08	osteoclast stimulatory transmembrane protein [Source:MGI Symbol;Acc:MGI:1921864]	Yes
Hdac7	ENSMUSG00000022475	-0.661555	1.24446e-08	histone deacetylase 7 [Source:MGI Symbol;Acc:MGI:1891835]
Mapk13	ENSMUSG00000004864	-0.899955	1.24458e-08	mitogen-activated protein kinase 13 [Source:MGI Symbol;Acc:MGI:1346864]
Fmo1	ENSMUSG00000040181	0.891774	1.24458e-08	flavin containing monooxygenase 1 [Source:MGI Symbol;Acc:MGI:1310002]
Ywhag	ENSMUSG00000051391	0.529163	1.27801e-08	tyrosine 3-monooxygenase/tryptophan 5-monooxygenase activation protein, gamma polypeptide [Source:MGI Symbol;Acc:MGI:108109]
Gdi1	ENSMUSG00000015291	0.407834	1.30296e-08	guanosine diphosphate (GDP) dissociation inhibitor 1 [Source:MGI Symbol;Acc:MGI:99846]
Me3	ENSMUSG00000030621	-0.892245	1.35115e-08	malic enzyme 3, NADP(+)-dependent, mitochondrial [Source:MGI Symbol;Acc:MGI:1916679]
Mtap	ENSMUSG00000062937	-0.456727	1.35803e-08	methylthioadenosine phosphorylase [Source:MGI Symbol;Acc:MGI:1914152]
Wdr72	ENSMUSG00000044976	-3.13724	1.36126e-08	WD repeat domain 72 [Source:MGI Symbol;Acc:MGI:3583957]	Yes
Emc7	ENSMUSG00000055943	0.452532	1.36181e-08	ER membrane protein complex subunit 7 [Source:MGI Symbol;Acc:MGI:1920274]
Dync2li1	ENSMUSG00000024253	-0.688692	1.37608e-08	dynein cytoplasmic 2 light intermediate chain 1 [Source:MGI Symbol;Acc:MGI:1913996]
Zscan26	ENSMUSG00000022228	-0.553103	1.40923e-08	zinc finger and SCAN domain containing 26 [Source:MGI Symbol;Acc:MGI:3531417]
Fktn	ENSMUSG00000028414	0.487747	1.50827e-08	fukutin [Source:MGI Symbol;Acc:MGI:2179507]
Edem3	ENSMUSG00000043019	0.480857	1.55531e-08	ER degradation enhancer, mannosidase alpha-like 3 [Source:MGI Symbol;Acc:MGI:1914217]
Fam13a	ENSMUSG00000037709	-1.5239	1.56418e-08	family with sequence similarity 13, member A [Source:MGI Symbol;Acc:MGI:1889842]	Yes
Plcxd2	ENSMUSG00000087141	-1.55846	1.56418e-08	phosphatidylinositol-specific phospholipase C, X domain containing 2 [Source:MGI Symbol;Acc:MGI:3647874]	Yes
Cyc1	ENSMUSG00000022551	0.494176	1.5902e-08	cytochrome c-1 [Source:MGI Symbol;Acc:MGI:1913695]
Gnl3l	ENSMUSG00000025266	0.456504	1.6194e-08	guanine nucleotide binding protein-like 3 (nucleolar)-like [Source:MGI Symbol;Acc:MGI:2448557]
Ighv1-62	ENSMUSG00000102765	6.95054	1.67463e-08	immunoglobulin heavy variable V1-62 [Source:MGI Symbol;Acc:MGI:5009844]	Yes
Eno2	ENSMUSG00000004267	-0.478099	1.70197e-08	enolase 2, gamma neuronal [Source:MGI Symbol;Acc:MGI:95394]
Atp13a3	ENSMUSG00000022533	-0.830244	1.70234e-08	ATPase type 13A3 [Source:MGI Symbol;Acc:MGI:2685387]
Btd	ENSMUSG00000021900	-0.527263	1.7096e-08	biotinidase [Source:MGI Symbol;Acc:MGI:1347001]
Socs5	ENSMUSG00000037104	-0.525154	1.72673e-08	suppressor of cytokine signaling 5 [Source:MGI Symbol;Acc:MGI:2385459]
Tac1	ENSMUSG00000061762	6.94115	1.75845e-08	tachykinin 1 [Source:MGI Symbol;Acc:MGI:98474]	Yes
Atp6v1g1	ENSMUSG00000039105	0.455825	1.79755e-08	ATPase, H+ transporting, lysosomal V1 subunit G1 [Source:MGI Symbol;Acc:MGI:1913540]
Scg2	ENSMUSG00000050711	-2.22756	1.81693e-08	secretogranin II [Source:MGI Symbol;Acc:MGI:103033]	Yes
Zfp90	ENSMUSG00000031907	-0.601078	1.81873e-08	zinc finger protein 90 [Source:MGI Symbol;Acc:MGI:104786]
Elk3	ENSMUSG00000008398	0.698	1.82283e-08	ELK3, member of ETS oncogene family [Source:MGI Symbol;Acc:MGI:101762]
Sp100	ENSMUSG00000026222	-1.0749	1.87811e-08	nuclear antigen Sp100 [Source:MGI Symbol;Acc:MGI:109561]
Bcam	ENSMUSG00000002980	-1.07738	1.90959e-08	basal cell adhesion molecule [Source:MGI Symbol;Acc:MGI:1929940]
Fbln5	ENSMUSG00000021186	-0.927322	1.92493e-08	fibulin 5 [Source:MGI Symbol;Acc:MGI:1346091]
Rasgrp3	ENSMUSG00000071042	-2.6302	1.93682e-08	RAS, guanyl releasing protein 3 [Source:MGI Symbol;Acc:MGI:3028579]	Yes
Pink1	ENSMUSG00000028756	-0.482858	1.9548e-08	PTEN induced putative kinase 1 [Source:MGI Symbol;Acc:MGI:1916193]
Adss	ENSMUSG00000015961	0.426091	2.04482e-08	adenylosuccinate synthetase, non muscle [Source:MGI Symbol;Acc:MGI:87948]
Myef2	ENSMUSG00000027201	0.60502	2.06001e-08	myelin basic protein expression factor 2, repressor [Source:MGI Symbol;Acc:MGI:104592]
Thra	ENSMUSG00000058756	-0.417531	2.06575e-08	thyroid hormone receptor alpha [Source:MGI Symbol;Acc:MGI:98742]
Flna	ENSMUSG00000031328	0.491522	2.07222e-08	filamin, alpha [Source:MGI Symbol;Acc:MGI:95556]
Lamb2	ENSMUSG00000052911	-0.468883	2.08272e-08	laminin, beta 2 [Source:MGI Symbol;Acc:MGI:99916]
Kansl1l	ENSMUSG00000026004	-0.691194	2.13398e-08	KAT8 regulatory NSL complex subunit 1-like [Source:MGI Symbol;Acc:MGI:1915941]
Cd320	ENSMUSG00000002308	0.78327	2.24411e-08	CD320 antigen [Source:MGI Symbol;Acc:MGI:1860083]
Shc2	ENSMUSG00000020312	0.676518	2.31546e-08	SHC (Src homology 2 domain containing) transforming protein 2 [Source:MGI Symbol;Acc:MGI:106180]
Gm30873	ENSMUSG00000109341	-3.51793	2.32201e-08	predicted gene, 30873 [Source:MGI Symbol;Acc:MGI:5590032]	Yes
Crocc2	ENSMUSG00000084989	-2.29618	2.39875e-08	ciliary rootlet coiled-coil, rootletin family member 2 [Source:MGI Symbol;Acc:MGI:3045962]	Yes
Ehf	ENSMUSG00000012350	3.97694	2.41392e-08	ets homologous factor [Source:MGI Symbol;Acc:MGI:1270840]	Yes
Optn	ENSMUSG00000026672	-0.602628	2.41392e-08	optineurin [Source:MGI Symbol;Acc:MGI:1918898]
Acsl3	ENSMUSG00000032883	0.692565	2.42046e-08	acyl-CoA synthetase long-chain family member 3 [Source:MGI Symbol;Acc:MGI:1921455]
Trpm4	ENSMUSG00000038260	-0.734997	2.43056e-08	transient receptor potential cation channel, subfamily M, member 4 [Source:MGI Symbol;Acc:MGI:1915917]
Srprb	ENSMUSG00000032553	0.595412	2.46133e-08	signal recognition particle receptor, B subunit [Source:MGI Symbol;Acc:MGI:102964]
Tmem150a	ENSMUSG00000055912	0.502398	2.47401e-08	transmembrane protein 150A [Source:MGI Symbol;Acc:MGI:2385244]
Cd1d1	ENSMUSG00000028076	0.633647	2.50008e-08	CD1d1 antigen [Source:MGI Symbol;Acc:MGI:107674]
Ptger3	ENSMUSG00000040016	2.36889	2.52196e-08	prostaglandin E receptor 3 (subtype EP3) [Source:MGI Symbol;Acc:MGI:97795]	Yes
Pnpla3	ENSMUSG00000041653	3.69832	2.58164e-08	patatin-like phospholipase domain containing 3 [Source:MGI Symbol;Acc:MGI:2151796]	Yes
Uba3	ENSMUSG00000030061	0.39794	2.59803e-08	ubiquitin-like modifier activating enzyme 3 [Source:MGI Symbol;Acc:MGI:1341217]
Lhx6	ENSMUSG00000026890	-1.84708	2.62972e-08	LIM homeobox protein 6 [Source:MGI Symbol;Acc:MGI:1306803]	Yes
Lrrc59	ENSMUSG00000020869	0.659522	2.6342e-08	leucine rich repeat containing 59 [Source:MGI Symbol;Acc:MGI:2138133]
Slc9a3r2	ENSMUSG00000002504	-0.816124	2.7223e-08	solute carrier family 9 (sodium/hydrogen exchanger), member 3 regulator 2 [Source:MGI Symbol;Acc:MGI:1890662]
Slpi	ENSMUSG00000017002	1.31846	2.75454e-08	secretory leukocyte peptidase inhibitor [Source:MGI Symbol;Acc:MGI:109297]
Aig1	ENSMUSG00000019806	-0.633275	2.75522e-08	androgen-induced 1 [Source:MGI Symbol;Acc:MGI:1913503]
Fndc3b	ENSMUSG00000039286	0.562656	2.82933e-08	fibronectin type III domain containing 3B [Source:MGI Symbol;Acc:MGI:1919257]
Gstm6	ENSMUSG00000068762	-1.89498	2.86225e-08	glutathione S-transferase, mu 6 [Source:MGI Symbol;Acc:MGI:1309467]	Yes
Pgd	ENSMUSG00000028961	0.673883	2.89178e-08	phosphogluconate dehydrogenase [Source:MGI Symbol;Acc:MGI:97553]
Myh10	ENSMUSG00000020900	-0.615836	2.9466e-08	myosin, heavy polypeptide 10, non-muscle [Source:MGI Symbol;Acc:MGI:1930780]
Got1	ENSMUSG00000025190	1.03731	2.9466e-08	glutamic-oxaloacetic transaminase 1, soluble [Source:MGI Symbol;Acc:MGI:95791]
Cetn4	ENSMUSG00000045031	-1.07361	2.96219e-08	centrin 4 [Source:MGI Symbol;Acc:MGI:2677454]
Bmp4	ENSMUSG00000021835	-1.78355	2.98469e-08	bone morphogenetic protein 4 [Source:MGI Symbol;Acc:MGI:88180]	Yes
Tmtc2	ENSMUSG00000036019	1.2529	3.05024e-08	transmembrane and tetratricopeptide repeat containing 2 [Source:MGI Symbol;Acc:MGI:1914057]
Tnrc18	ENSMUSG00000039477	-0.455194	3.07134e-08	trinucleotide repeat containing 18 [Source:MGI Symbol;Acc:MGI:3648294]
Mcub	ENSMUSG00000027994	0.600116	3.07185e-08	mitochondrial calcium uniporter dominant negative beta subunit [Source:MGI Symbol;Acc:MGI:1914065]
Dcbld2	ENSMUSG00000035107	0.817549	3.15246e-08	discoidin, CUB and LCCL domain containing 2 [Source:MGI Symbol;Acc:MGI:1920629]
Stk39	ENSMUSG00000027030	0.715672	3.19102e-08	serine/threonine kinase 39 [Source:MGI Symbol;Acc:MGI:1858416]
Cisd1	ENSMUSG00000037710	0.722345	3.19215e-08	CDGSH iron sulfur domain 1 [Source:MGI Symbol;Acc:MGI:1261855]
Nucb2	ENSMUSG00000030659	-0.445199	3.20634e-08	nucleobindin 2 [Source:MGI Symbol;Acc:MGI:1858179]
Serpina3h	ENSMUSG00000041449	-3.15095	3.20914e-08	serine (or cysteine) peptidase inhibitor, clade A, member 3H [Source:MGI Symbol;Acc:MGI:2182839]	Yes
Vopp1	ENSMUSG00000037788	0.413978	3.31944e-08	vesicular, overexpressed in cancer, prosurvival protein 1 [Source:MGI Symbol;Acc:MGI:2141658]
Vstm5	ENSMUSG00000031937	-1.84009	3.32426e-08	V-set and transmembrane domain containing 5 [Source:MGI Symbol;Acc:MGI:1916387]	Yes
Arfip2	ENSMUSG00000030881	0.439191	3.45491e-08	ADP-ribosylation factor interacting protein 2 [Source:MGI Symbol;Acc:MGI:1924182]
Ypel3	ENSMUSG00000042675	-0.523005	3.50551e-08	yippee like 3 [Source:MGI Symbol;Acc:MGI:1913340]
Fnbp1l	ENSMUSG00000039735	0.561238	3.51311e-08	formin binding protein 1-like [Source:MGI Symbol;Acc:MGI:1925642]
Tshz3	ENSMUSG00000021217	0.742288	3.53437e-08	teashirt zinc finger family member 3 [Source:MGI Symbol;Acc:MGI:2442819]
Slc4a4	ENSMUSG00000060961	0.759817	3.57794e-08	solute carrier family 4 (anion exchanger), member 4 [Source:MGI Symbol;Acc:MGI:1927555]
Rybp	ENSMUSG00000072872	1.02764	3.57794e-08	RING1 and YY1 binding protein [Source:MGI Symbol;Acc:MGI:1929059]
Rybp-1	ENSMUSG00000072872	1.02764	3.57794e-08	RING1 and YY1 binding protein [Source:MGI Symbol;Acc:MGI:1929059]
Tsr1	ENSMUSG00000038335	0.552752	3.62819e-08	TSR1 20S rRNA accumulation [Source:MGI Symbol;Acc:MGI:2144566]
H4c9	ENSMUSG00000060639	1.28054	3.66995e-08	H4 clustered histone 9 [Source:MGI Symbol;Acc:MGI:2448432]
Acacb	ENSMUSG00000042010	-1.25539	3.67572e-08	acetyl-Coenzyme A carboxylase beta [Source:MGI Symbol;Acc:MGI:2140940]
Denn2b	ENSMUSG00000031024	-0.750138	3.67912e-08	DENN domain containing 2B [Source:MGI Symbol;Acc:MGI:108517]
Cyp27a1	ENSMUSG00000026170	-2.0394	3.67969e-08	cytochrome P450, family 27, subfamily a, polypeptide 1 [Source:MGI Symbol;Acc:MGI:88594]	Yes
Cst6	ENSMUSG00000024846	-1.62855	3.75875e-08	cystatin E/M [Source:MGI Symbol;Acc:MGI:1920970]	Yes
Apbb2	ENSMUSG00000029207	-0.493538	3.82095e-08	amyloid beta (A4) precursor protein-binding, family B, member 2 [Source:MGI Symbol;Acc:MGI:108405]
Il27ra	ENSMUSG00000005465	-2.26993	3.87805e-08	interleukin 27 receptor, alpha [Source:MGI Symbol;Acc:MGI:1355318]	Yes
Trerf1	ENSMUSG00000064043	-0.790721	3.87818e-08	transcriptional regulating factor 1 [Source:MGI Symbol;Acc:MGI:2442086]
Cdv3	ENSMUSG00000032803	-0.389981	3.88126e-08	carnitine deficiency-associated gene expressed in ventricle 3 [Source:MGI Symbol;Acc:MGI:2448759]
Slc1a3	ENSMUSG00000005360	0.791067	3.894e-08	solute carrier family 1 (glial high affinity glutamate transporter), member 3 [Source:MGI Symbol;Acc:MGI:99917]
Fuca2	ENSMUSG00000019810	-0.477266	3.98639e-08	fucosidase, alpha-L- 2, plasma [Source:MGI Symbol;Acc:MGI:1914098]
Asap1	ENSMUSG00000022377	-0.717904	4.00204e-08	ArfGAP with SH3 domain, ankyrin repeat and PH domain1 [Source:MGI Symbol;Acc:MGI:1342335]
Gpx7	ENSMUSG00000028597	0.611649	4.032e-08	glutathione peroxidase 7 [Source:MGI Symbol;Acc:MGI:1914555]
Mapk10	ENSMUSG00000046709	2.69953	4.065e-08	mitogen-activated protein kinase 10 [Source:MGI Symbol;Acc:MGI:1346863]	Yes
Fam124a	ENSMUSG00000035184	-1.72638	4.13067e-08	family with sequence similarity 124, member A [Source:MGI Symbol;Acc:MGI:3645930]	Yes
Gm7265	ENSMUSG00000102573	1.28359	4.20067e-08	predicted gene 7265 [Source:MGI Symbol;Acc:MGI:3648991]
Psmb8	ENSMUSG00000024338	-1.02086	4.20082e-08	proteasome (prosome, macropain) subunit, beta type 8 (large multifunctional peptidase 7) [Source:MGI Symbol;Acc:MGI:1346527]
Paqr4	ENSMUSG00000023909	-1.54458	4.32104e-08	progestin and adipoQ receptor family member IV [Source:MGI Symbol;Acc:MGI:1923748]	Yes
Nptx1	ENSMUSG00000025582	-4.07992	4.3386e-08	neuronal pentraxin 1 [Source:MGI Symbol;Acc:MGI:107811]	Yes
Dpt	ENSMUSG00000026574	2.63761	4.7378e-08	dermatopontin [Source:MGI Symbol;Acc:MGI:1928392]	Yes
Slc26a2	ENSMUSG00000034320	0.548297	4.81948e-08	solute carrier family 26 (sulfate transporter), member 2 [Source:MGI Symbol;Acc:MGI:892977]
Nfe2l2	ENSMUSG00000015839	0.606918	4.9673e-08	nuclear factor, erythroid derived 2, like 2 [Source:MGI Symbol;Acc:MGI:108420]
Wnt5a	ENSMUSG00000021994	0.646583	5.02495e-08	wingless-type MMTV integration site family, member 5A [Source:MGI Symbol;Acc:MGI:98958]
Rassf4	ENSMUSG00000042129	-1.60888	5.04565e-08	Ras association (RalGDS/AF-6) domain family member 4 [Source:MGI Symbol;Acc:MGI:2386853]	Yes
Clec11a	ENSMUSG00000004473	-0.65509	5.14001e-08	C-type lectin domain family 11, member a [Source:MGI Symbol;Acc:MGI:1298219]
Mir100hg	ENSMUSG00000074415	-0.639676	5.2358e-08	Mir100 Mirlet7a-2 Mir125b-1 cluster host gene [Source:MGI Symbol;Acc:MGI:1920394]
Olfm1	ENSMUSG00000026833	-0.727452	5.32074e-08	olfactomedin 1 [Source:MGI Symbol;Acc:MGI:1860437]
Parpbp	ENSMUSG00000035365	1.28189	5.4217e-08	PARP1 binding protein [Source:MGI Symbol;Acc:MGI:1922567]
Carhsp1	ENSMUSG00000008393	0.449078	5.45236e-08	calcium regulated heat stable protein 1 [Source:MGI Symbol;Acc:MGI:1196368]
Tmed2	ENSMUSG00000029390	0.516574	5.55464e-08	transmembrane p24 trafficking protein 2 [Source:MGI Symbol;Acc:MGI:1929269]
Cited1	ENSMUSG00000051159	4.06032	5.63088e-08	Cbp/p300-interacting transactivator with Glu/Asp-rich carboxy-terminal domain 1 [Source:MGI Symbol;Acc:MGI:108023]	Yes
Ifi47	ENSMUSG00000078920	-1.78484	5.75743e-08	interferon gamma inducible protein 47 [Source:MGI Symbol;Acc:MGI:99448]	Yes
Ergic1	ENSMUSG00000001576	0.437888	5.8283e-08	endoplasmic reticulum-golgi intermediate compartment (ERGIC) 1 [Source:MGI Symbol;Acc:MGI:1914708]
Cd300ld	ENSMUSG00000034641	-1.54097	5.84578e-08	CD300 molecule like family member d [Source:MGI Symbol;Acc:MGI:2442358]	Yes
Nhp2	ENSMUSG00000001056	0.541874	5.8829e-08	NHP2 ribonucleoprotein [Source:MGI Symbol;Acc:MGI:1098547]
Add3	ENSMUSG00000025026	1.01596	5.92348e-08	adducin 3 (gamma) [Source:MGI Symbol;Acc:MGI:1351615]
Rhobtb3	ENSMUSG00000021589	-0.523513	6.00599e-08	Rho-related BTB domain containing 3 [Source:MGI Symbol;Acc:MGI:1920546]
Dynlt3	ENSMUSG00000031176	0.402231	6.06245e-08	dynein light chain Tctex-type 3 [Source:MGI Symbol;Acc:MGI:1914367]
Pgpep1	ENSMUSG00000056204	0.45563	6.06245e-08	pyroglutamyl-peptidase I [Source:MGI Symbol;Acc:MGI:1913772]
Grik5	ENSMUSG00000003378	-0.661067	6.16517e-08	glutamate receptor, ionotropic, kainate 5 (gamma 2) [Source:MGI Symbol;Acc:MGI:95818]
Ang	ENSMUSG00000072115	0.892054	6.22569e-08	angiogenin, ribonuclease, RNase A family, 5 [Source:MGI Symbol;Acc:MGI:88022]
Tasp1	ENSMUSG00000039033	-0.808106	6.23935e-08	taspase, threonine aspartase 1 [Source:MGI Symbol;Acc:MGI:1923062]
Top2b	ENSMUSG00000017485	0.42075	6.43286e-08	topoisomerase (DNA) II beta [Source:MGI Symbol;Acc:MGI:98791]
Zbtb37	ENSMUSG00000043467	-0.600143	6.49088e-08	zinc finger and BTB domain containing 37 [Source:MGI Symbol;Acc:MGI:2444467]
Selenot	ENSMUSG00000075700	0.372482	6.6292e-08	selenoprotein T [Source:MGI Symbol;Acc:MGI:1916477]
Steap1	ENSMUSG00000015652	0.864748	6.68604e-08	six transmembrane epithelial antigen of the prostate 1 [Source:MGI Symbol;Acc:MGI:1917608]
Pcdhb14	ENSMUSG00000044043	0.778958	6.72201e-08	protocadherin beta 14 [Source:MGI Symbol;Acc:MGI:2136749]
Irgm1	ENSMUSG00000046879	-0.609516	6.73999e-08	immunity-related GTPase family M member 1 [Source:MGI Symbol;Acc:MGI:107567]
Man2b1	ENSMUSG00000005142	-0.628674	6.7705e-08	mannosidase 2, alpha B1 [Source:MGI Symbol;Acc:MGI:107286]
Id4	ENSMUSG00000021379	-1.79106	6.77701e-08	inhibitor of DNA binding 4 [Source:MGI Symbol;Acc:MGI:99414]	Yes
Scn5a	ENSMUSG00000032511	5.55311	6.97509e-08	sodium channel, voltage-gated, type V, alpha [Source:MGI Symbol;Acc:MGI:98251]	Yes
Sptan1	ENSMUSG00000057738	0.344557	7.03697e-08	spectrin alpha, non-erythrocytic 1 [Source:MGI Symbol;Acc:MGI:98386]
Nr4a3	ENSMUSG00000028341	1.83439	7.08284e-08	nuclear receptor subfamily 4, group A, member 3 [Source:MGI Symbol;Acc:MGI:1352457]	Yes
Synj2	ENSMUSG00000023805	-0.735817	7.14369e-08	synaptojanin 2 [Source:MGI Symbol;Acc:MGI:1201671]
Bcl2l11	ENSMUSG00000027381	0.68808	7.15497e-08	BCL2-like 11 (apoptosis facilitator) [Source:MGI Symbol;Acc:MGI:1197519]
2310030G06Rik	ENSMUSG00000032062	-3.83035	7.25958e-08	RIKEN cDNA 2310030G06 gene [Source:MGI Symbol;Acc:MGI:1914202]	Yes
Mitf	ENSMUSG00000035158	-1.24192	7.27273e-08	melanogenesis associated transcription factor [Source:MGI Symbol;Acc:MGI:104554]
Fxr2	ENSMUSG00000018765	0.419555	7.32014e-08	fragile X mental retardation, autosomal homolog 2 [Source:MGI Symbol;Acc:MGI:1346074]
1700025G04Rik	ENSMUSG00000032666	0.811534	7.33696e-08	RIKEN cDNA 1700025G04 gene [Source:MGI Symbol;Acc:MGI:1916649]
Slc52a3	ENSMUSG00000027463	-1.94575	7.50008e-08	solute carrier protein family 52, member 3 [Source:MGI Symbol;Acc:MGI:1916948]	Yes
Hk3	ENSMUSG00000025877	-1.33545	7.66903e-08	hexokinase 3 [Source:MGI Symbol;Acc:MGI:2670962]
Cnot8	ENSMUSG00000020515	0.41268	7.79045e-08	CCR4-NOT transcription complex, subunit 8 [Source:MGI Symbol;Acc:MGI:1916375]
Jmjd8	ENSMUSG00000025736	0.604695	7.86649e-08	jumonji domain containing 8 [Source:MGI Symbol;Acc:MGI:1919356]
Cd300a	ENSMUSG00000034652	-1.41018	7.93712e-08	CD300A molecule [Source:MGI Symbol;Acc:MGI:2443411]
Pwwp3a	ENSMUSG00000020156	-0.495568	8.03167e-08	PWWP domain containing 3A, DNA repair factor [Source:MGI Symbol;Acc:MGI:1915364]
Nav1	ENSMUSG00000009418	0.538311	8.07841e-08	neuron navigator 1 [Source:MGI Symbol;Acc:MGI:2183683]
Mkx	ENSMUSG00000061013	0.514198	8.17308e-08	mohawk homeobox [Source:MGI Symbol;Acc:MGI:2687286]
Ranbp6	ENSMUSG00000074909	0.537212	8.37582e-08	RAN binding protein 6 [Source:MGI Symbol;Acc:MGI:2683212]
Gm9913	ENSMUSG00000053615	1.88803	8.43635e-08	predicted gene 9913 [Source:MGI Symbol;Acc:MGI:3642395]	Yes
Maneal	ENSMUSG00000042763	-1.75245	8.62523e-08	mannosidase, endo-alpha-like [Source:MGI Symbol;Acc:MGI:2684896]	Yes
Nipal1	ENSMUSG00000067219	-1.27397	8.63818e-08	NIPA-like domain containing 1 [Source:MGI Symbol;Acc:MGI:1917951]
S100a16	ENSMUSG00000074457	0.689444	8.63818e-08	S100 calcium binding protein A16 [Source:MGI Symbol;Acc:MGI:1915110]
Arf1	ENSMUSG00000048076	0.388301	8.64565e-08	ADP-ribosylation factor 1 [Source:MGI Symbol;Acc:MGI:99431]
Hapln1	ENSMUSG00000021613	1.42526	8.68511e-08	hyaluronan and proteoglycan link protein 1 [Source:MGI Symbol;Acc:MGI:1337006]
Glrb	ENSMUSG00000028020	1.27817	8.78352e-08	glycine receptor, beta subunit [Source:MGI Symbol;Acc:MGI:95751]
Akirin1	ENSMUSG00000023075	0.738385	8.83318e-08	akirin 1 [Source:MGI Symbol;Acc:MGI:1915300]
Ddx60	ENSMUSG00000037921	-1.41203	8.84079e-08	DExD/H box helicase 60 [Source:MGI Symbol;Acc:MGI:2384570]
Irs2	ENSMUSG00000038894	0.887278	8.94934e-08	insulin receptor substrate 2 [Source:MGI Symbol;Acc:MGI:109334]
Elovl7	ENSMUSG00000021696	1.92479	8.95576e-08	ELOVL family member 7, elongation of long chain fatty acids (yeast) [Source:MGI Symbol;Acc:MGI:1921809]	Yes
Marcksl1	ENSMUSG00000047945	0.652193	9.16086e-08	MARCKS-like 1 [Source:MGI Symbol;Acc:MGI:97143]
Ptpre	ENSMUSG00000041836	-1.05392	9.16584e-08	protein tyrosine phosphatase, receptor type, E [Source:MGI Symbol;Acc:MGI:97813]
Hand2	ENSMUSG00000038193	1.90148	9.40525e-08	heart and neural crest derivatives expressed 2 [Source:MGI Symbol;Acc:MGI:103580]	Yes
Ppt1	ENSMUSG00000028657	-0.387067	9.56971e-08	palmitoyl-protein thioesterase 1 [Source:MGI Symbol;Acc:MGI:1298204]
C9orf72	ENSMUSG00000028300	0.558604	9.59177e-08	C9orf72, member of C9orf72-SMCR8 complex [Source:MGI Symbol;Acc:MGI:1920455]
Parp8	ENSMUSG00000021725	0.657325	9.68733e-08	poly (ADP-ribose) polymerase family, member 8 [Source:MGI Symbol;Acc:MGI:1098713]
Bzw1	ENSMUSG00000051223	0.71544	9.7685e-08	basic leucine zipper and W2 domains 1 [Source:MGI Symbol;Acc:MGI:1914132]
Lclat1	ENSMUSG00000054469	-0.559193	9.88548e-08	lysocardiolipin acyltransferase 1 [Source:MGI Symbol;Acc:MGI:2684937]
Parp16	ENSMUSG00000032392	-1.19661	9.96124e-08	poly (ADP-ribose) polymerase family, member 16 [Source:MGI Symbol;Acc:MGI:2446133]
Thrb	ENSMUSG00000021779	-0.971589	9.97375e-08	thyroid hormone receptor beta [Source:MGI Symbol;Acc:MGI:98743]
Meis2	ENSMUSG00000027210	0.548882	9.97375e-08	Meis homeobox 2 [Source:MGI Symbol;Acc:MGI:108564]
Sh3pxd2a	ENSMUSG00000053617	0.557046	1.00682e-07	SH3 and PX domains 2A [Source:MGI Symbol;Acc:MGI:1298393]
Surf4	ENSMUSG00000014867	0.639872	1.0124e-07	surfeit gene 4 [Source:MGI Symbol;Acc:MGI:98445]
Irak2	ENSMUSG00000060477	0.682254	1.01436e-07	interleukin-1 receptor-associated kinase 2 [Source:MGI Symbol;Acc:MGI:2429603]
Mrpl36	ENSMUSG00000021607	0.493049	1.02135e-07	mitochondrial ribosomal protein L36 [Source:MGI Symbol;Acc:MGI:2137228]
Fchsd1	ENSMUSG00000038524	-0.589903	1.07721e-07	FCH and double SH3 domains 1 [Source:MGI Symbol;Acc:MGI:2441771]
Ddx21	ENSMUSG00000020075	0.50039	1.08282e-07	DExD box helicase 21 [Source:MGI Symbol;Acc:MGI:1860494]
Slc2a13	ENSMUSG00000036298	0.910474	1.08614e-07	solute carrier family 2 (facilitated glucose transporter), member 13 [Source:MGI Symbol;Acc:MGI:2146030]
Smad9	ENSMUSG00000027796	-1.20306	1.09171e-07	SMAD family member 9 [Source:MGI Symbol;Acc:MGI:1859993]
Clcn4	ENSMUSG00000000605	0.399375	1.09582e-07	chloride channel, voltage-sensitive 4 [Source:MGI Symbol;Acc:MGI:104571]
Dgat2	ENSMUSG00000030747	0.979	1.09619e-07	diacylglycerol O-acyltransferase 2 [Source:MGI Symbol;Acc:MGI:1915050]
Pnpla7	ENSMUSG00000036833	-0.708848	1.09913e-07	patatin-like phospholipase domain containing 7 [Source:MGI Symbol;Acc:MGI:2385325]
Notch1	ENSMUSG00000026923	-0.585896	1.10792e-07	notch 1 [Source:MGI Symbol;Acc:MGI:97363]
Rtn4r	ENSMUSG00000043811	-1.50504	1.14665e-07	reticulon 4 receptor [Source:MGI Symbol;Acc:MGI:2136886]	Yes
Ifngr1	ENSMUSG00000020009	0.485821	1.15252e-07	interferon gamma receptor 1 [Source:MGI Symbol;Acc:MGI:107655]
Peli2	ENSMUSG00000021846	-0.712753	1.15252e-07	pellino 2 [Source:MGI Symbol;Acc:MGI:1891445]
Peli2-1	ENSMUSG00000021846	-0.712753	1.15252e-07	pellino 2 [Source:MGI Symbol;Acc:MGI:1891445]
Micos10	ENSMUSG00000050608	0.498895	1.1561e-07	mitochondrial contact site and cristae organizing system subunit 10 [Source:MGI Symbol;Acc:MGI:1913628]
Ch25h	ENSMUSG00000050370	-1.0974	1.16217e-07	cholesterol 25-hydroxylase [Source:MGI Symbol;Acc:MGI:1333869]
Calcoco1	ENSMUSG00000023055	-0.417428	1.1668e-07	calcium binding and coiled coil domain 1 [Source:MGI Symbol;Acc:MGI:1914738]
Cln5	ENSMUSG00000022125	0.458012	1.16922e-07	ceroid-lipofuscinosis, neuronal 5 [Source:MGI Symbol;Acc:MGI:2442253]
Kcnn3	ENSMUSG00000000794	-2.13066	1.17772e-07	potassium intermediate/small conductance calcium-activated channel, subfamily N, member 3 [Source:MGI Symbol;Acc:MGI:2153183]	Yes
Cers2	ENSMUSG00000015714	0.476972	1.18677e-07	ceramide synthase 2 [Source:MGI Symbol;Acc:MGI:1924143]
Ptms	ENSMUSG00000030122	0.380658	1.19497e-07	parathymosin [Source:MGI Symbol;Acc:MGI:1916452]
Il6	ENSMUSG00000025746	3.00057	1.19611e-07	interleukin 6 [Source:MGI Symbol;Acc:MGI:96559]	Yes
Slc4a11	ENSMUSG00000074796	-1.55294	1.22326e-07	solute carrier family 4, sodium bicarbonate transporter-like, member 11 [Source:MGI Symbol;Acc:MGI:2138987]	Yes
Morrbid	ENSMUSG00000074813	1.51189	1.23089e-07	myeloid RNA regulator of BCL2L11 induced cell death [Source:MGI Symbol;Acc:MGI:3652191]	Yes
Nipa1	ENSMUSG00000047037	0.617684	1.23558e-07	non imprinted in Prader-Willi/Angelman syndrome 1 homolog (human) [Source:MGI Symbol;Acc:MGI:2442058]
Tmem14c	ENSMUSG00000021361	0.45613	1.24939e-07	transmembrane protein 14C [Source:MGI Symbol;Acc:MGI:1913404]
Lsamp	ENSMUSG00000061080	5.42838	1.2596e-07	limbic system-associated membrane protein [Source:MGI Symbol;Acc:MGI:1261760]	Yes
Rassf1	ENSMUSG00000010067	0.54092	1.29031e-07	Ras association (RalGDS/AF-6) domain family member 1 [Source:MGI Symbol;Acc:MGI:1928386]
Aida	ENSMUSG00000042901	-0.369478	1.30047e-07	axin interactor, dorsalization associated [Source:MGI Symbol;Acc:MGI:1919737]
Tmed5	ENSMUSG00000063406	0.487421	1.30131e-07	transmembrane p24 trafficking protein 5 [Source:MGI Symbol;Acc:MGI:1921586]
Fxyd1	ENSMUSG00000036570	-0.593746	1.32166e-07	FXYD domain-containing ion transport regulator 1 [Source:MGI Symbol;Acc:MGI:1889273]
Samd8	ENSMUSG00000021770	0.528976	1.33214e-07	sterile alpha motif domain containing 8 [Source:MGI Symbol;Acc:MGI:1914880]
Copb1	ENSMUSG00000030754	0.435081	1.33928e-07	coatomer protein complex, subunit beta 1 [Source:MGI Symbol;Acc:MGI:1917599]
Gm6277	ENSMUSG00000097440	2.60034	1.3537e-07	predicted gene 6277 [Source:MGI Symbol;Acc:MGI:3779583]	Yes
Mgmt	ENSMUSG00000054612	-0.540306	1.36772e-07	O-6-methylguanine-DNA methyltransferase [Source:MGI Symbol;Acc:MGI:96977]
Adamts1	ENSMUSG00000022893	1.07156	1.37487e-07	a disintegrin-like and metallopeptidase (reprolysin type) with thrombospondin type 1 motif, 1 [Source:MGI Symbol;Acc:MGI:109249]
Kcne4	ENSMUSG00000047330	1.0053	1.37679e-07	potassium voltage-gated channel, Isk-related subfamily, gene 4 [Source:MGI Symbol;Acc:MGI:1891125]
Rasa4	ENSMUSG00000004952	-1.19948	1.39881e-07	RAS p21 protein activator 4 [Source:MGI Symbol;Acc:MGI:1858600]
Adam9	ENSMUSG00000031555	0.603904	1.4022e-07	a disintegrin and metallopeptidase domain 9 (meltrin gamma) [Source:MGI Symbol;Acc:MGI:105376]
Cd109	ENSMUSG00000046186	-0.761072	1.42017e-07	CD109 antigen [Source:MGI Symbol;Acc:MGI:2445221]
Aplp1	ENSMUSG00000006651	0.544376	1.43304e-07	amyloid beta (A4) precursor-like protein 1 [Source:MGI Symbol;Acc:MGI:88046]
Atp5md	ENSMUSG00000071528	0.427979	1.46689e-07	ATP synthase membrane subunit DAPIT [Source:MGI Symbol;Acc:MGI:1891435]
Atp5md-1	ENSMUSG00000071528	0.427979	1.46689e-07	ATP synthase membrane subunit DAPIT [Source:MGI Symbol;Acc:MGI:1891435]
Lrrc75a	ENSMUSG00000046417	-1.1822	1.48554e-07	leucine rich repeat containing 75A [Source:MGI Symbol;Acc:MGI:2682293]
Ccn5	ENSMUSG00000027656	-0.809627	1.48842e-07	cellular communication network factor 5 [Source:MGI Symbol;Acc:MGI:1328326]
Rin2	ENSMUSG00000001768	-0.695729	1.49215e-07	Ras and Rab interactor 2 [Source:MGI Symbol;Acc:MGI:1921280]
Rin2-1	ENSMUSG00000001768	-0.695729	1.49215e-07	Ras and Rab interactor 2 [Source:MGI Symbol;Acc:MGI:1921280]
Gm13394	ENSMUSG00000083773	0.594246	1.51339e-07	predicted gene 13394 [Source:MGI Symbol;Acc:MGI:3651848]
Chp1	ENSMUSG00000014077	0.425379	1.53654e-07	calcineurin-like EF hand protein 1 [Source:MGI Symbol;Acc:MGI:1927185]
Per3	ENSMUSG00000028957	-0.632902	1.54642e-07	period circadian clock 3 [Source:MGI Symbol;Acc:MGI:1277134]
Phgdh	ENSMUSG00000053398	-0.817643	1.55113e-07	3-phosphoglycerate dehydrogenase [Source:MGI Symbol;Acc:MGI:1355330]
Carmil3	ENSMUSG00000022211	-1.34417	1.55487e-07	capping protein regulator and myosin 1 linker 3 [Source:MGI Symbol;Acc:MGI:2448573]
Paqr6	ENSMUSG00000041423	-4.12448	1.55487e-07	progestin and adipoQ receptor family member VI [Source:MGI Symbol;Acc:MGI:1916207]	Yes
Fzd4	ENSMUSG00000049791	1.18748	1.55487e-07	frizzled class receptor 4 [Source:MGI Symbol;Acc:MGI:108520]
Adamtsl1	ENSMUSG00000066113	-0.5691	1.59757e-07	ADAMTS-like 1 [Source:MGI Symbol;Acc:MGI:1924989]
Dnah7b	ENSMUSG00000041144	-1.05649	1.60382e-07	dynein, axonemal, heavy chain 7B [Source:MGI Symbol;Acc:MGI:2684953]
Insyn1	ENSMUSG00000066607	0.625271	1.61461e-07	inhibitory synaptic factor 1 [Source:MGI Symbol;Acc:MGI:2442108]
Tank	ENSMUSG00000064289	0.476805	1.63538e-07	TRAF family member-associated Nf-kappa B activator [Source:MGI Symbol;Acc:MGI:107676]
Dctd	ENSMUSG00000031562	-0.820962	1.64394e-07	dCMP deaminase [Source:MGI Symbol;Acc:MGI:2444529]
Timm23	ENSMUSG00000013701	0.522499	1.70676e-07	translocase of inner mitochondrial membrane 23 [Source:MGI Symbol;Acc:MGI:1858317]
Ccdc50	ENSMUSG00000038127	0.454546	1.72351e-07	coiled-coil domain containing 50 [Source:MGI Symbol;Acc:MGI:1914751]
Tap2	ENSMUSG00000024339	-0.475572	1.79806e-07	transporter 2, ATP-binding cassette, sub-family B (MDR/TAP) [Source:MGI Symbol;Acc:MGI:98484]
Fam53b	ENSMUSG00000030956	-0.638611	1.86009e-07	family with sequence similarity 53, member B [Source:MGI Symbol;Acc:MGI:1925188]
Il18rap	ENSMUSG00000026068	1.69227	1.86131e-07	interleukin 18 receptor accessory protein [Source:MGI Symbol;Acc:MGI:1338888]	Yes
Ifi203	ENSMUSG00000039997	-1.21528	1.86891e-07	interferon activated gene 203 [Source:MGI Symbol;Acc:MGI:96428]
Rnf213	ENSMUSG00000070327	-0.631533	1.92041e-07	ring finger protein 213 [Source:MGI Symbol;Acc:MGI:1289196]
Gm9844	ENSMUSG00000091955	0.562955	1.95503e-07	predicted pseudogene 9844 [Source:MGI Symbol;Acc:MGI:3704288]
ENSMUSG00000021745	ENSMUSG00000021745	-0.475858	1.96346e-07	NA
Adcy3	ENSMUSG00000020654	-0.484364	1.96661e-07	adenylate cyclase 3 [Source:MGI Symbol;Acc:MGI:99675]
Enho	ENSMUSG00000028445	-0.826552	2.00459e-07	energy homeostasis associated [Source:MGI Symbol;Acc:MGI:1916888]
Rftn2	ENSMUSG00000025978	-0.503842	2.0364e-07	raftlin family member 2 [Source:MGI Symbol;Acc:MGI:1921263]
Lcorl	ENSMUSG00000015882	0.775557	2.08797e-07	ligand dependent nuclear receptor corepressor-like [Source:MGI Symbol;Acc:MGI:2651932]
Lcorl-1	ENSMUSG00000015882	0.775557	2.08797e-07	ligand dependent nuclear receptor corepressor-like [Source:MGI Symbol;Acc:MGI:2651932]
Stxbp4	ENSMUSG00000020546	0.6586	2.09321e-07	syntaxin binding protein 4 [Source:MGI Symbol;Acc:MGI:1342296]
Asah2	ENSMUSG00000024887	-0.45338	2.11652e-07	N-acylsphingosine amidohydrolase 2 [Source:MGI Symbol;Acc:MGI:1859310]
Procr	ENSMUSG00000027611	0.764024	2.13086e-07	protein C receptor, endothelial [Source:MGI Symbol;Acc:MGI:104596]
Cabin1	ENSMUSG00000020196	-0.638109	2.15229e-07	calcineurin binding protein 1 [Source:MGI Symbol;Acc:MGI:1298375]
Aldh9a1	ENSMUSG00000026687	-0.700812	2.15229e-07	aldehyde dehydrogenase 9, subfamily A1 [Source:MGI Symbol;Acc:MGI:1861622]
F2r	ENSMUSG00000048376	0.680713	2.22303e-07	coagulation factor II (thrombin) receptor [Source:MGI Symbol;Acc:MGI:101802]
Bmpr1a	ENSMUSG00000021796	0.520191	2.22841e-07	bone morphogenetic protein receptor, type 1A [Source:MGI Symbol;Acc:MGI:1338938]
Scn3b	ENSMUSG00000049281	-1.54553	2.22841e-07	sodium channel, voltage-gated, type III, beta [Source:MGI Symbol;Acc:MGI:1918882]	Yes
Creld1	ENSMUSG00000030284	0.587516	2.23426e-07	cysteine-rich with EGF-like domains 1 [Source:MGI Symbol;Acc:MGI:2152539]
Id1	ENSMUSG00000042745	-0.954593	2.26823e-07	inhibitor of DNA binding 1, HLH protein [Source:MGI Symbol;Acc:MGI:96396]
Tpm1	ENSMUSG00000032366	-0.465276	2.27763e-07	tropomyosin 1, alpha [Source:MGI Symbol;Acc:MGI:98809]
Gxylt2	ENSMUSG00000030074	0.995301	2.3131e-07	glucoside xylosyltransferase 2 [Source:MGI Symbol;Acc:MGI:2682940]
Cmklr1	ENSMUSG00000042190	1.67631	2.3202e-07	chemokine-like receptor 1 [Source:MGI Symbol;Acc:MGI:109603]	Yes
Ret	ENSMUSG00000030110	2.81108	2.32646e-07	ret proto-oncogene [Source:MGI Symbol;Acc:MGI:97902]	Yes
Cd300lb	ENSMUSG00000063193	-1.22863	2.32646e-07	CD300 molecule like family member B [Source:MGI Symbol;Acc:MGI:2685099]
Rragb	ENSMUSG00000041658	-1.54244	2.36118e-07	Ras-related GTP binding B [Source:MGI Symbol;Acc:MGI:3038613]	Yes
Hivep1	ENSMUSG00000021366	0.629837	2.4034e-07	human immunodeficiency virus type I enhancer binding protein 1 [Source:MGI Symbol;Acc:MGI:96100]
Dclk1	ENSMUSG00000027797	-0.346684	2.41819e-07	doublecortin-like kinase 1 [Source:MGI Symbol;Acc:MGI:1330861]
Relt	ENSMUSG00000008318	1.35062	2.43402e-07	RELT tumor necrosis factor receptor [Source:MGI Symbol;Acc:MGI:2443373]
Fyco1	ENSMUSG00000025241	-0.37819	2.45824e-07	FYVE and coiled-coil domain containing 1 [Source:MGI Symbol;Acc:MGI:107277]
Tspyl4	ENSMUSG00000039485	0.674274	2.4713e-07	TSPY-like 4 [Source:MGI Symbol;Acc:MGI:106393]
Mlec	ENSMUSG00000048578	0.399087	2.62572e-07	malectin [Source:MGI Symbol;Acc:MGI:1924015]
Cmas	ENSMUSG00000030282	0.453716	2.63231e-07	cytidine monophospho-N-acetylneuraminic acid synthetase [Source:MGI Symbol;Acc:MGI:1337124]
Sh3bp4	ENSMUSG00000036206	0.689108	2.64793e-07	SH3-domain binding protein 4 [Source:MGI Symbol;Acc:MGI:2138297]
Ctsa	ENSMUSG00000017760	-0.502367	2.67974e-07	cathepsin A [Source:MGI Symbol;Acc:MGI:97748]
Phldb1	ENSMUSG00000048537	-0.500763	2.68689e-07	pleckstrin homology like domain, family B, member 1 [Source:MGI Symbol;Acc:MGI:2143230]
Ezh1	ENSMUSG00000006920	-0.467319	2.69976e-07	enhancer of zeste 1 polycomb repressive complex 2 subunit [Source:MGI Symbol;Acc:MGI:1097695]
Synpo	ENSMUSG00000043079	0.488971	2.69976e-07	synaptopodin [Source:MGI Symbol;Acc:MGI:1099446]
Sox4	ENSMUSG00000076431	0.914618	2.69976e-07	SRY (sex determining region Y)-box 4 [Source:MGI Symbol;Acc:MGI:98366]
Fzd3	ENSMUSG00000007989	2.01937	2.71326e-07	frizzled class receptor 3 [Source:MGI Symbol;Acc:MGI:108476]	Yes
Pygm	ENSMUSG00000032648	-1.83666	2.7301e-07	muscle glycogen phosphorylase [Source:MGI Symbol;Acc:MGI:97830]	Yes
Mill2	ENSMUSG00000040987	-1.04018	2.80084e-07	MHC I like leukocyte 2 [Source:MGI Symbol;Acc:MGI:2179989]
Gm16201	ENSMUSG00000086742	-1.28905	2.8135e-07	predicted gene 16201 [Source:MGI Symbol;Acc:MGI:3802153]
Megf6	ENSMUSG00000057751	-0.899881	2.83256e-07	multiple EGF-like-domains 6 [Source:MGI Symbol;Acc:MGI:1919351]
Pianp	ENSMUSG00000030329	-0.557118	2.83795e-07	PILR alpha associated neural protein [Source:MGI Symbol;Acc:MGI:2441908]
Sar1b	ENSMUSG00000020386	0.470191	2.86622e-07	secretion associated Ras related GTPase 1B [Source:MGI Symbol;Acc:MGI:1913647]
Mtus1	ENSMUSG00000045636	0.514568	2.92418e-07	mitochondrial tumor suppressor 1 [Source:MGI Symbol;Acc:MGI:2142572]
Atp5b	ENSMUSG00000025393	0.393583	3.00045e-07	ATP synthase, H+ transporting mitochondrial F1 complex, beta subunit [Source:MGI Symbol;Acc:MGI:107801]
Gm15958	ENSMUSG00000085055	-3.08433	3.14574e-07	predicted gene 15958 [Source:MGI Symbol;Acc:MGI:3801839]	Yes
Glipr2	ENSMUSG00000028480	0.773112	3.19145e-07	GLI pathogenesis-related 2 [Source:MGI Symbol;Acc:MGI:1917770]
Nin	ENSMUSG00000021068	0.601001	3.21383e-07	ninein [Source:MGI Symbol;Acc:MGI:105108]
Plxna3	ENSMUSG00000031398	-0.749609	3.21383e-07	plexin A3 [Source:MGI Symbol;Acc:MGI:107683]
Cntn1	ENSMUSG00000055022	1.52084	3.23039e-07	contactin 1 [Source:MGI Symbol;Acc:MGI:105980]	Yes
Akap12	ENSMUSG00000038587	0.433615	3.23876e-07	A kinase (PRKA) anchor protein (gravin) 12 [Source:MGI Symbol;Acc:MGI:1932576]
Exoc7	ENSMUSG00000020792	-0.409989	3.24737e-07	exocyst complex component 7 [Source:MGI Symbol;Acc:MGI:1859270]
Map4	ENSMUSG00000032479	-0.331908	3.24737e-07	microtubule-associated protein 4 [Source:MGI Symbol;Acc:MGI:97178]
Syn3	ENSMUSG00000059602	-1.79052	3.24737e-07	synapsin III [Source:MGI Symbol;Acc:MGI:1351334]	Yes
Tgoln1	ENSMUSG00000056429	0.445169	3.29427e-07	trans-golgi network protein [Source:MGI Symbol;Acc:MGI:105080]
Per1	ENSMUSG00000020893	0.505711	3.3378e-07	period circadian clock 1 [Source:MGI Symbol;Acc:MGI:1098283]
Mansc4	ENSMUSG00000072662	3.63439	3.34833e-07	MANSC domain containing 4 [Source:MGI Symbol;Acc:MGI:3645619]	Yes
Zfp462	ENSMUSG00000060206	0.604141	3.35726e-07	zinc finger protein 462 [Source:MGI Symbol;Acc:MGI:107690]
Cldnd1	ENSMUSG00000022744	0.419359	3.39781e-07	claudin domain containing 1 [Source:MGI Symbol;Acc:MGI:2447860]
Vat1	ENSMUSG00000034993	-0.582334	3.44332e-07	vesicle amine transport 1 [Source:MGI Symbol;Acc:MGI:1349450]
Fam107b	ENSMUSG00000026655	0.679688	3.4645e-07	family with sequence similarity 107, member B [Source:MGI Symbol;Acc:MGI:1913790]
F830016B08Rik	ENSMUSG00000090942	-1.65772	3.4645e-07	RIKEN cDNA F830016B08 gene [Source:MGI Symbol;Acc:MGI:3588218]	Yes
Tjap1	ENSMUSG00000012296	-0.568814	3.54337e-07	tight junction associated protein 1 [Source:MGI Symbol;Acc:MGI:1921344]
Tnks2	ENSMUSG00000024811	0.617892	3.58087e-07	tankyrase, TRF1-interacting ankyrin-related ADP-ribose polymerase 2 [Source:MGI Symbol;Acc:MGI:1921743]
Hdac11	ENSMUSG00000034245	-0.630978	3.66206e-07	histone deacetylase 11 [Source:MGI Symbol;Acc:MGI:2385252]
Kcnk2	ENSMUSG00000037624	-1.39739	3.66283e-07	potassium channel, subfamily K, member 2 [Source:MGI Symbol;Acc:MGI:109366]
Tmem59	ENSMUSG00000028618	0.35583	3.68658e-07	transmembrane protein 59 [Source:MGI Symbol;Acc:MGI:1929278]
Anxa4	ENSMUSG00000029994	-0.444146	3.69485e-07	annexin A4 [Source:MGI Symbol;Acc:MGI:88030]
Nrg1	ENSMUSG00000062991	-1.39627	3.71299e-07	neuregulin 1 [Source:MGI Symbol;Acc:MGI:96083]
Nkiras1	ENSMUSG00000021772	0.588599	3.72525e-07	NFKB inhibitor interacting Ras-like protein 1 [Source:MGI Symbol;Acc:MGI:1916971]
Sp7	ENSMUSG00000060284	-3.27588	3.74472e-07	Sp7 transcription factor 7 [Source:MGI Symbol;Acc:MGI:2153568]	Yes
Mfsd9	ENSMUSG00000041945	0.798157	3.80184e-07	major facilitator superfamily domain containing 9 [Source:MGI Symbol;Acc:MGI:2443548]
Anxa1	ENSMUSG00000024659	-0.573976	3.84009e-07	annexin A1 [Source:MGI Symbol;Acc:MGI:96819]
Adgrg2	ENSMUSG00000031298	-1.95837	3.89109e-07	adhesion G protein-coupled receptor G2 [Source:MGI Symbol;Acc:MGI:2446854]	Yes
Vps26c	ENSMUSG00000022898	-0.411214	3.92496e-07	VPS26 endosomal protein sorting factor C [Source:MGI Symbol;Acc:MGI:1206040]
9330159F19Rik	ENSMUSG00000004360	1.8801	4.00147e-07	RIKEN cDNA 9330159F19 gene [Source:MGI Symbol;Acc:MGI:3036239]	Yes
Dnajb6	ENSMUSG00000029131	0.418507	4.03078e-07	DnaJ heat shock protein family (Hsp40) member B6 [Source:MGI Symbol;Acc:MGI:1344381]
Tnfrsf21	ENSMUSG00000023915	1.27661	4.04223e-07	tumor necrosis factor receptor superfamily, member 21 [Source:MGI Symbol;Acc:MGI:2151075]
Amfr	ENSMUSG00000031751	0.399542	4.06699e-07	autocrine motility factor receptor [Source:MGI Symbol;Acc:MGI:1345634]
Rapsn	ENSMUSG00000002104	-1.73167	4.09035e-07	receptor-associated protein of the synapse [Source:MGI Symbol;Acc:MGI:99422]	Yes
Taf13	ENSMUSG00000048100	0.609621	4.20742e-07	TATA-box binding protein associated factor 13 [Source:MGI Symbol;Acc:MGI:1913500]
Sec22b	ENSMUSG00000027879	0.450579	4.21931e-07	SEC22 homolog B, vesicle trafficking protein [Source:MGI Symbol;Acc:MGI:1338759]
Csnk1e	ENSMUSG00000022433	0.493896	4.26006e-07	casein kinase 1, epsilon [Source:MGI Symbol;Acc:MGI:1351660]
Pcdhgc5	ENSMUSG00000102543	-0.775312	4.26006e-07	protocadherin gamma subfamily C, 5 [Source:MGI Symbol;Acc:MGI:1935205]
Ankrd40	ENSMUSG00000020864	-0.502185	4.28606e-07	ankyrin repeat domain 40 [Source:MGI Symbol;Acc:MGI:1918702]
Cnksr1	ENSMUSG00000028841	-2.98137	4.38975e-07	connector enhancer of kinase suppressor of Ras 1 [Source:MGI Symbol;Acc:MGI:2670958]	Yes
Ar	ENSMUSG00000046532	0.638764	4.39332e-07	androgen receptor [Source:MGI Symbol;Acc:MGI:88064]
Nat8f5	ENSMUSG00000079494	2.91625	4.42021e-07	N-acetyltransferase 8 (GCN5-related) family member 5 [Source:MGI Symbol;Acc:MGI:1916299]	Yes
Brsk1	ENSMUSG00000035390	0.543231	4.4708e-07	BR serine/threonine kinase 1 [Source:MGI Symbol;Acc:MGI:2685946]
Slc41a1	ENSMUSG00000013275	-0.57257	4.47312e-07	solute carrier family 41, member 1 [Source:MGI Symbol;Acc:MGI:2444823]
C4b	ENSMUSG00000073418	-0.789127	4.47312e-07	complement component 4B (Chido blood group) [Source:MGI Symbol;Acc:MGI:88228]
Sesn1	ENSMUSG00000038332	-0.519874	4.47835e-07	sestrin 1 [Source:MGI Symbol;Acc:MGI:2155278]
Fxyd5	ENSMUSG00000009687	1.82546	4.51228e-07	FXYD domain-containing ion transport regulator 5 [Source:MGI Symbol;Acc:MGI:1201785]	Yes
Psmb3	ENSMUSG00000069744	0.410298	4.67954e-07	proteasome (prosome, macropain) subunit, beta type 3 [Source:MGI Symbol;Acc:MGI:1347014]
Sema6a	ENSMUSG00000019647	1.02685	4.75745e-07	sema domain, transmembrane domain (TM), and cytoplasmic domain, (semaphorin) 6A [Source:MGI Symbol;Acc:MGI:1203727]
Parp3	ENSMUSG00000023249	-0.435045	4.76433e-07	poly (ADP-ribose) polymerase family, member 3 [Source:MGI Symbol;Acc:MGI:1891258]
Mageh1	ENSMUSG00000047238	0.657593	4.77732e-07	MAGE family member H1 [Source:MGI Symbol;Acc:MGI:1922875]
Psmb9	ENSMUSG00000096727	-1.28165	4.86267e-07	proteasome (prosome, macropain) subunit, beta type 9 (large multifunctional peptidase 2) [Source:MGI Symbol;Acc:MGI:1346526]
St7	ENSMUSG00000029534	0.678867	4.89733e-07	suppression of tumorigenicity 7 [Source:MGI Symbol;Acc:MGI:1927450]
Ripk3	ENSMUSG00000022221	0.731107	4.93372e-07	receptor-interacting serine-threonine kinase 3 [Source:MGI Symbol;Acc:MGI:2154952]
1700001L05Rik	ENSMUSG00000075511	-1.92984	4.94591e-07	RIKEN cDNA 1700001L05 gene [Source:MGI Symbol;Acc:MGI:1916541]	Yes
Ccdc85a	ENSMUSG00000032878	1.70222	4.98198e-07	coiled-coil domain containing 85A [Source:MGI Symbol;Acc:MGI:2445069]	Yes
Adgrd1	ENSMUSG00000044017	-1.56044	5.08245e-07	adhesion G protein-coupled receptor D1 [Source:MGI Symbol;Acc:MGI:3041203]	Yes
Strap	ENSMUSG00000030224	0.417176	5.08383e-07	serine/threonine kinase receptor associated protein [Source:MGI Symbol;Acc:MGI:1329037]
Lama3	ENSMUSG00000024421	-1.93136	5.1207e-07	laminin, alpha 3 [Source:MGI Symbol;Acc:MGI:99909]	Yes
Prkar1a	ENSMUSG00000020612	0.341297	5.25478e-07	protein kinase, cAMP dependent regulatory, type I, alpha [Source:MGI Symbol;Acc:MGI:104878]
Eif3j1	ENSMUSG00000027236	0.445149	5.3304e-07	eukaryotic translation initiation factor 3, subunit J1 [Source:MGI Symbol;Acc:MGI:1925905]
Cct6a	ENSMUSG00000029447	0.442422	5.3776e-07	chaperonin containing Tcp1, subunit 6a (zeta) [Source:MGI Symbol;Acc:MGI:107943]
Unc5b	ENSMUSG00000020099	-0.666949	5.4023e-07	unc-5 netrin receptor B [Source:MGI Symbol;Acc:MGI:894703]
Hs2st1	ENSMUSG00000040151	0.956535	5.41729e-07	heparan sulfate 2-O-sulfotransferase 1 [Source:MGI Symbol;Acc:MGI:1346049]
Ncbp1	ENSMUSG00000028330	0.468017	5.45129e-07	nuclear cap binding protein subunit 1 [Source:MGI Symbol;Acc:MGI:1891840]
Kcnj15	ENSMUSG00000062609	1.99991	5.45187e-07	potassium inwardly-rectifying channel, subfamily J, member 15 [Source:MGI Symbol;Acc:MGI:1310000]	Yes
Dram1	ENSMUSG00000020057	0.778404	5.46491e-07	DNA-damage regulated autophagy modulator 1 [Source:MGI Symbol;Acc:MGI:1918962]
Arhgdib	ENSMUSG00000030220	-0.939271	5.48737e-07	Rho, GDP dissociation inhibitor (GDI) beta [Source:MGI Symbol;Acc:MGI:101940]
Hspa9	ENSMUSG00000024359	0.347568	5.50072e-07	heat shock protein 9 [Source:MGI Symbol;Acc:MGI:96245]
Parp14	ENSMUSG00000034422	-1.03808	5.515e-07	poly (ADP-ribose) polymerase family, member 14 [Source:MGI Symbol;Acc:MGI:1919489]
Syngap1	ENSMUSG00000067629	-0.550037	5.67562e-07	synaptic Ras GTPase activating protein 1 homolog (rat) [Source:MGI Symbol;Acc:MGI:3039785]
Vasp	ENSMUSG00000030403	0.401945	5.67746e-07	vasodilator-stimulated phosphoprotein [Source:MGI Symbol;Acc:MGI:109268]
Uxs1	ENSMUSG00000057363	0.416079	5.71185e-07	UDP-glucuronate decarboxylase 1 [Source:MGI Symbol;Acc:MGI:1915133]
B3gnt3	ENSMUSG00000031803	-1.09145	5.71369e-07	UDP-GlcNAc:betaGal beta-1,3-N-acetylglucosaminyltransferase 3 [Source:MGI Symbol;Acc:MGI:2152535]
Slc25a30	ENSMUSG00000022003	0.781942	5.97258e-07	solute carrier family 25, member 30 [Source:MGI Symbol;Acc:MGI:1914804]
Cacng7	ENSMUSG00000069806	-0.539187	6.20221e-07	calcium channel, voltage-dependent, gamma subunit 7 [Source:MGI Symbol;Acc:MGI:1932374]
Ltbp3	ENSMUSG00000024940	0.402553	6.28383e-07	latent transforming growth factor beta binding protein 3 [Source:MGI Symbol;Acc:MGI:1101355]
Lrrc41	ENSMUSG00000028703	0.452521	6.30756e-07	leucine rich repeat containing 41 [Source:MGI Symbol;Acc:MGI:2441984]
Pacsin2	ENSMUSG00000016664	-0.427647	6.31418e-07	protein kinase C and casein kinase substrate in neurons 2 [Source:MGI Symbol;Acc:MGI:1345153]
Kifc2	ENSMUSG00000004187	-0.932867	6.32362e-07	kinesin family member C2 [Source:MGI Symbol;Acc:MGI:109187]
Camk1	ENSMUSG00000030272	-0.516024	6.37323e-07	calcium/calmodulin-dependent protein kinase I [Source:MGI Symbol;Acc:MGI:1098535]
Ubqln1	ENSMUSG00000005312	0.454095	6.4583e-07	ubiquilin 1 [Source:MGI Symbol;Acc:MGI:1860276]
Palm	ENSMUSG00000035863	0.429102	6.49807e-07	paralemmin [Source:MGI Symbol;Acc:MGI:1261814]
Grsf1	ENSMUSG00000044221	0.534824	6.51202e-07	G-rich RNA sequence binding factor 1 [Source:MGI Symbol;Acc:MGI:106479]
Trib2	ENSMUSG00000020601	0.770944	6.51468e-07	tribbles pseudokinase 2 [Source:MGI Symbol;Acc:MGI:2145021]
Grm8	ENSMUSG00000024211	4.69384	6.59168e-07	glutamate receptor, metabotropic 8 [Source:MGI Symbol;Acc:MGI:1351345]	Yes
Hpse	ENSMUSG00000035273	-0.961632	6.7353e-07	heparanase [Source:MGI Symbol;Acc:MGI:1343124]
Bst2	ENSMUSG00000046718	-0.812638	6.81907e-07	bone marrow stromal cell antigen 2 [Source:MGI Symbol;Acc:MGI:1916800]
Psma7	ENSMUSG00000027566	0.442279	6.8539e-07	proteasome subunit alpha 7 [Source:MGI Symbol;Acc:MGI:1347070]
App	ENSMUSG00000022892	-0.41874	6.88348e-07	amyloid beta (A4) precursor protein [Source:MGI Symbol;Acc:MGI:88059]
Mars1	ENSMUSG00000040354	0.477643	6.88348e-07	methionine-tRNA synthetase 1 [Source:MGI Symbol;Acc:MGI:1345633]
Ivns1abp	ENSMUSG00000023150	0.536086	6.94455e-07	influenza virus NS1A binding protein [Source:MGI Symbol;Acc:MGI:2152389]
Kcnip3	ENSMUSG00000079056	-1.24464	6.95335e-07	Kv channel interacting protein 3, calsenilin [Source:MGI Symbol;Acc:MGI:1929258]
Mdfic	ENSMUSG00000041390	0.471831	6.95921e-07	MyoD family inhibitor domain containing [Source:MGI Symbol;Acc:MGI:104611]
Arhgap27	ENSMUSG00000034255	-1.11944	6.96332e-07	Rho GTPase activating protein 27 [Source:MGI Symbol;Acc:MGI:1916903]
Entpd2	ENSMUSG00000015085	-1.7168	7.26258e-07	ectonucleoside triphosphate diphosphohydrolase 2 [Source:MGI Symbol;Acc:MGI:1096863]	Yes
Osbpl1a	ENSMUSG00000044252	-0.549791	7.29427e-07	oxysterol binding protein-like 1A [Source:MGI Symbol;Acc:MGI:1927551]
Gm12715	ENSMUSG00000059195	0.723634	7.30144e-07	predicted gene 12715 [Source:MGI Symbol;Acc:MGI:3650759]
Itga7	ENSMUSG00000025348	-1.19491	7.4045e-07	integrin alpha 7 [Source:MGI Symbol;Acc:MGI:102700]
Sik1	ENSMUSG00000024042	0.824445	7.41123e-07	salt inducible kinase 1 [Source:MGI Symbol;Acc:MGI:104754]
Ptprm	ENSMUSG00000033278	-0.515098	7.43505e-07	protein tyrosine phosphatase, receptor type, M [Source:MGI Symbol;Acc:MGI:102694]
Olfml2a	ENSMUSG00000046618	-2.88546	7.72709e-07	olfactomedin-like 2A [Source:MGI Symbol;Acc:MGI:2444741]	Yes
Icam5	ENSMUSG00000032174	-1.76767	7.9745e-07	intercellular adhesion molecule 5, telencephalin [Source:MGI Symbol;Acc:MGI:109430]	Yes
Crispld2	ENSMUSG00000031825	0.827944	7.99644e-07	cysteine-rich secretory protein LCCL domain containing 2 [Source:MGI Symbol;Acc:MGI:1926142]
Kcnk10	ENSMUSG00000033854	4.16569	8.13189e-07	potassium channel, subfamily K, member 10 [Source:MGI Symbol;Acc:MGI:1919508]	Yes
Hcn4	ENSMUSG00000032338	4.31183	8.21912e-07	hyperpolarization-activated, cyclic nucleotide-gated K+ 4 [Source:MGI Symbol;Acc:MGI:1298209]	Yes
Ulk4	ENSMUSG00000040936	-1.00256	8.22121e-07	unc-51-like kinase 4 [Source:MGI Symbol;Acc:MGI:1921622]
Tyk2	ENSMUSG00000032175	-0.674562	8.34772e-07	tyrosine kinase 2 [Source:MGI Symbol;Acc:MGI:1929470]
Lif	ENSMUSG00000034394	1.12685	8.42419e-07	leukemia inhibitory factor [Source:MGI Symbol;Acc:MGI:96787]
Tnfrsf23	ENSMUSG00000037613	0.883836	8.47216e-07	tumor necrosis factor receptor superfamily, member 23 [Source:MGI Symbol;Acc:MGI:1930269]
Hs3st3a1	ENSMUSG00000047759	-1.50231	8.57513e-07	heparan sulfate (glucosamine) 3-O-sulfotransferase 3A1 [Source:MGI Symbol;Acc:MGI:1333861]	Yes
Dgkh	ENSMUSG00000034731	1.07447	8.71911e-07	diacylglycerol kinase, eta [Source:MGI Symbol;Acc:MGI:2444188]
Larp6	ENSMUSG00000034839	-0.931198	8.72498e-07	La ribonucleoprotein domain family, member 6 [Source:MGI Symbol;Acc:MGI:1914807]
Pdhb	ENSMUSG00000021748	0.397507	9.11925e-07	pyruvate dehydrogenase (lipoamide) beta [Source:MGI Symbol;Acc:MGI:1915513]
Il1rn	ENSMUSG00000026981	-2.65197	9.11925e-07	interleukin 1 receptor antagonist [Source:MGI Symbol;Acc:MGI:96547]	Yes
Wnt5b	ENSMUSG00000030170	1.03569	9.13401e-07	wingless-type MMTV integration site family, member 5B [Source:MGI Symbol;Acc:MGI:98959]
Rdm1	ENSMUSG00000010362	-0.948355	9.1762e-07	RAD52 motif 1 [Source:MGI Symbol;Acc:MGI:1913849]
Ankrd1	ENSMUSG00000024803	-2.24431	9.25919e-07	ankyrin repeat domain 1 (cardiac muscle) [Source:MGI Symbol;Acc:MGI:1097717]	Yes
Serp1	ENSMUSG00000027808	0.365462	9.2764e-07	stress-associated endoplasmic reticulum protein 1 [Source:MGI Symbol;Acc:MGI:92638]
Foxk2	ENSMUSG00000039275	0.470703	9.28486e-07	forkhead box K2 [Source:MGI Symbol;Acc:MGI:1916087]
Ly75	ENSMUSG00000026980	-1.3951	9.43003e-07	lymphocyte antigen 75 [Source:MGI Symbol;Acc:MGI:106662]
Nr2f2	ENSMUSG00000030551	0.730077	9.47588e-07	nuclear receptor subfamily 2, group F, member 2 [Source:MGI Symbol;Acc:MGI:1352452]
Slc40a1	ENSMUSG00000025993	-2.18805	9.77156e-07	solute carrier family 40 (iron-regulated transporter), member 1 [Source:MGI Symbol;Acc:MGI:1315204]	Yes
Fkbp7	ENSMUSG00000002732	0.460364	9.94579e-07	FK506 binding protein 7 [Source:MGI Symbol;Acc:MGI:1336879]
Psmd13	ENSMUSG00000025487	0.387556	1.00455e-06	proteasome (prosome, macropain) 26S subunit, non-ATPase, 13 [Source:MGI Symbol;Acc:MGI:1345192]
Rai2	ENSMUSG00000043518	-0.818584	1.00455e-06	retinoic acid induced 2 [Source:MGI Symbol;Acc:MGI:1344378]
Sh3glb1	ENSMUSG00000037062	0.369586	1.00526e-06	SH3-domain GRB2-like B1 (endophilin) [Source:MGI Symbol;Acc:MGI:1859730]
Ostf1	ENSMUSG00000024725	0.441673	1.0245e-06	osteoclast stimulating factor 1 [Source:MGI Symbol;Acc:MGI:700012]
Tshz2	ENSMUSG00000047907	0.604611	1.02786e-06	teashirt zinc finger family member 2 [Source:MGI Symbol;Acc:MGI:2153084]
Pcp4l1	ENSMUSG00000038370	-5.2558	1.03704e-06	Purkinje cell protein 4-like 1 [Source:MGI Symbol;Acc:MGI:1913675]	Yes
Sirt2	ENSMUSG00000015149	-0.343392	1.04878e-06	sirtuin 2 [Source:MGI Symbol;Acc:MGI:1927664]
Rapgef3	ENSMUSG00000022469	-0.839698	1.05841e-06	Rap guanine nucleotide exchange factor (GEF) 3 [Source:MGI Symbol;Acc:MGI:2441741]
Cd200r1	ENSMUSG00000022667	-1.30204	1.06404e-06	CD200 receptor 1 [Source:MGI Symbol;Acc:MGI:1889024]
Kremen1	ENSMUSG00000020393	0.43479	1.06828e-06	kringle containing transmembrane protein 1 [Source:MGI Symbol;Acc:MGI:1933988]
Nat8f3	ENSMUSG00000051262	0.952837	1.07453e-06	N-acetyltransferase 8 (GCN5-related) family member 3 [Source:MGI Symbol;Acc:MGI:2136449]
1700003E16Rik	ENSMUSG00000030030	-1.42345	1.08548e-06	RIKEN cDNA 1700003E16 gene [Source:MGI Symbol;Acc:MGI:1919087]
Abcc9	ENSMUSG00000030249	-1.86948	1.09897e-06	ATP-binding cassette, sub-family C (CFTR/MRP), member 9 [Source:MGI Symbol;Acc:MGI:1352630]	Yes
Trim63	ENSMUSG00000028834	-6.3217	1.10016e-06	tripartite motif-containing 63 [Source:MGI Symbol;Acc:MGI:2447992]	Yes
Eef2	ENSMUSG00000034994	-0.340798	1.11172e-06	eukaryotic translation elongation factor 2 [Source:MGI Symbol;Acc:MGI:95288]
Gm37795	ENSMUSG00000102813	-0.798618	1.11172e-06	predicted gene, 37795 [Source:MGI Symbol;Acc:MGI:5611023]
Dio3	ENSMUSG00000075707	-2.73759	1.11401e-06	deiodinase, iodothyronine type III [Source:MGI Symbol;Acc:MGI:1306782]	Yes
Uqcrq	ENSMUSG00000044894	0.505774	1.11581e-06	ubiquinol-cytochrome c reductase, complex III subunit VII [Source:MGI Symbol;Acc:MGI:107807]
Sh3d21	ENSMUSG00000073758	-1.30781	1.12306e-06	SH3 domain containing 21 [Source:MGI Symbol;Acc:MGI:1914188]
Eepd1	ENSMUSG00000036611	-1.39759	1.13617e-06	endonuclease/exonuclease/phosphatase family domain containing 1 [Source:MGI Symbol;Acc:MGI:1914734]
Mpp1	ENSMUSG00000031402	0.440352	1.13669e-06	membrane protein, palmitoylated [Source:MGI Symbol;Acc:MGI:105941]
Pnoc	ENSMUSG00000045731	6.50422	1.18849e-06	prepronociceptin [Source:MGI Symbol;Acc:MGI:105308]	Yes
Cygb	ENSMUSG00000020810	-0.797137	1.18859e-06	cytoglobin [Source:MGI Symbol;Acc:MGI:2149481]
Cltb	ENSMUSG00000047547	0.410294	1.19336e-06	clathrin, light polypeptide (Lcb) [Source:MGI Symbol;Acc:MGI:1921575]
Tnip2	ENSMUSG00000059866	-0.620579	1.21096e-06	TNFAIP3 interacting protein 2 [Source:MGI Symbol;Acc:MGI:2386643]
Memo1	ENSMUSG00000058704	0.426436	1.21803e-06	mediator of cell motility 1 [Source:MGI Symbol;Acc:MGI:1924140]
Ston1	ENSMUSG00000033855	-0.373297	1.21945e-06	stonin 1 [Source:MGI Symbol;Acc:MGI:1924307]
Lrrc3	ENSMUSG00000051652	-1.59703	1.22128e-06	leucine rich repeat containing 3 [Source:MGI Symbol;Acc:MGI:2447899]	Yes
Rep15	ENSMUSG00000040121	-1.25188	1.24368e-06	RAB15 effector protein [Source:MGI Symbol;Acc:MGI:1913782]
Kdr	ENSMUSG00000062960	2.54154	1.24368e-06	kinase insert domain protein receptor [Source:MGI Symbol;Acc:MGI:96683]	Yes
Rcsd1	ENSMUSG00000040723	-1.68496	1.26617e-06	RCSD domain containing 1 [Source:MGI Symbol;Acc:MGI:2676394]	Yes
Irak1bp1	ENSMUSG00000032251	-0.814938	1.26789e-06	interleukin-1 receptor-associated kinase 1 binding protein 1 [Source:MGI Symbol;Acc:MGI:1929475]
Ccser2	ENSMUSG00000058690	-0.399228	1.31079e-06	coiled-coil serine rich 2 [Source:MGI Symbol;Acc:MGI:101859]
Abhd5	ENSMUSG00000032540	0.422115	1.32423e-06	abhydrolase domain containing 5 [Source:MGI Symbol;Acc:MGI:1914719]
Mn1	ENSMUSG00000070576	0.490185	1.34129e-06	meningioma 1 [Source:MGI Symbol;Acc:MGI:1261813]
Slc35b2	ENSMUSG00000037089	0.441045	1.35162e-06	solute carrier family 35, member B2 [Source:MGI Symbol;Acc:MGI:1921086]
Senp3	ENSMUSG00000005204	0.392797	1.36461e-06	SUMO/sentrin specific peptidase 3 [Source:MGI Symbol;Acc:MGI:2158736]
Lrrc17	ENSMUSG00000039883	0.698381	1.36816e-06	leucine rich repeat containing 17 [Source:MGI Symbol;Acc:MGI:1921761]
Rrn3	ENSMUSG00000022682	0.443603	1.39288e-06	RRN3 RNA polymerase I transcription factor homolog (yeast) [Source:MGI Symbol;Acc:MGI:1925255]
Fbln7	ENSMUSG00000027386	-1.0166	1.4034e-06	fibulin 7 [Source:MGI Symbol;Acc:MGI:1917620]
1700029J07Rik	ENSMUSG00000071103	-1.33035	1.4034e-06	RIKEN cDNA 1700029J07 gene [Source:MGI Symbol;Acc:MGI:1916729]
Ier3ip1	ENSMUSG00000090000	0.526206	1.44315e-06	immediate early response 3 interacting protein 1 [Source:MGI Symbol;Acc:MGI:1913441]
Slc44a2	ENSMUSG00000057193	-0.366672	1.46275e-06	solute carrier family 44, member 2 [Source:MGI Symbol;Acc:MGI:1915932]
Col6a2	ENSMUSG00000020241	-0.342512	1.49269e-06	collagen, type VI, alpha 2 [Source:MGI Symbol;Acc:MGI:88460]
Pik3r1	ENSMUSG00000041417	-0.403105	1.49283e-06	phosphoinositide-3-kinase regulatory subunit 1 [Source:MGI Symbol;Acc:MGI:97583]
Reps2	ENSMUSG00000040855	-1.32264	1.49295e-06	RALBP1 associated Eps domain containing protein 2 [Source:MGI Symbol;Acc:MGI:2663511]
Ckmt1	ENSMUSG00000000308	-2.0962	1.49624e-06	creatine kinase, mitochondrial 1, ubiquitous [Source:MGI Symbol;Acc:MGI:99441]	Yes
Plekhg4	ENSMUSG00000014782	-0.872045	1.51267e-06	pleckstrin homology domain containing, family G (with RhoGef domain) member 4 [Source:MGI Symbol;Acc:MGI:2142544]
Arpc3	ENSMUSG00000029465	0.501721	1.522e-06	actin related protein 2/3 complex, subunit 3 [Source:MGI Symbol;Acc:MGI:1928375]
1810055G02Rik	ENSMUSG00000035372	0.449726	1.52747e-06	RIKEN cDNA 1810055G02 gene [Source:MGI Symbol;Acc:MGI:1919306]
Plin3	ENSMUSG00000024197	-0.442553	1.52849e-06	perilipin 3 [Source:MGI Symbol;Acc:MGI:1914155]
Ykt6	ENSMUSG00000002741	0.44059	1.54166e-06	YKT6 v-SNARE homolog (S. cerevisiae) [Source:MGI Symbol;Acc:MGI:1927550]
Lrp4	ENSMUSG00000027253	-1.10676	1.55659e-06	low density lipoprotein receptor-related protein 4 [Source:MGI Symbol;Acc:MGI:2442252]
Dhtkd1	ENSMUSG00000025815	-0.843526	1.57094e-06	dehydrogenase E1 and transketolase domain containing 1 [Source:MGI Symbol;Acc:MGI:2445096]
Itga1	ENSMUSG00000042284	-0.696978	1.60112e-06	integrin alpha 1 [Source:MGI Symbol;Acc:MGI:96599]
Cdh11	ENSMUSG00000031673	-0.611823	1.60454e-06	cadherin 11 [Source:MGI Symbol;Acc:MGI:99217]
Dnm3os	ENSMUSG00000078190	-0.67642	1.61682e-06	dynamin 3, opposite strand [Source:MGI Symbol;Acc:MGI:3052332]
Crybg3	ENSMUSG00000022723	-0.78244	1.6213e-06	beta-gamma crystallin domain containing 3 [Source:MGI Symbol;Acc:MGI:2676311]
Mex3b	ENSMUSG00000057706	0.991972	1.62914e-06	mex3 RNA binding family member B [Source:MGI Symbol;Acc:MGI:1918252]
Gnpnat1	ENSMUSG00000037722	0.457058	1.63847e-06	glucosamine-phosphate N-acetyltransferase 1 [Source:MGI Symbol;Acc:MGI:1858963]
Lrrk1	ENSMUSG00000015133	-0.522101	1.65365e-06	leucine-rich repeat kinase 1 [Source:MGI Symbol;Acc:MGI:2142227]
Cmtm6	ENSMUSG00000032434	0.425455	1.6559e-06	CKLF-like MARVEL transmembrane domain containing 6 [Source:MGI Symbol;Acc:MGI:2447165]
Mxra7	ENSMUSG00000020814	0.491083	1.65718e-06	matrix-remodelling associated 7 [Source:MGI Symbol;Acc:MGI:1914872]
Hecw2	ENSMUSG00000042807	-1.05876	1.67259e-06	HECT, C2 and WW domain containing E3 ubiquitin protein ligase 2 [Source:MGI Symbol;Acc:MGI:2685817]
Arnt	ENSMUSG00000015522	0.452155	1.67281e-06	aryl hydrocarbon receptor nuclear translocator [Source:MGI Symbol;Acc:MGI:88071]
Arhgef6	ENSMUSG00000031133	-0.693801	1.7122e-06	Rac/Cdc42 guanine nucleotide exchange factor (GEF) 6 [Source:MGI Symbol;Acc:MGI:1920591]
Tnpo1	ENSMUSG00000009470	0.346668	1.73083e-06	transportin 1 [Source:MGI Symbol;Acc:MGI:2681523]
Eps8l2	ENSMUSG00000025504	-1.5644	1.73376e-06	EPS8-like 2 [Source:MGI Symbol;Acc:MGI:2138828]	Yes
Snapc4	ENSMUSG00000036281	-0.574867	1.75835e-06	small nuclear RNA activating complex, polypeptide 4 [Source:MGI Symbol;Acc:MGI:2443935]
Szrd1	ENSMUSG00000040842	0.339486	1.75835e-06	SUZ RNA binding domain containing 1 [Source:MGI Symbol;Acc:MGI:1098672]
Fam91a1	ENSMUSG00000037119	0.416714	1.76088e-06	family with sequence similarity 91, member A1 [Source:MGI Symbol;Acc:MGI:1277178]
Mt2	ENSMUSG00000031762	0.582616	1.797e-06	metallothionein 2 [Source:MGI Symbol;Acc:MGI:97172]
Rrs1	ENSMUSG00000061024	0.534145	1.797e-06	ribosome biogenesis regulator 1 [Source:MGI Symbol;Acc:MGI:1929721]
Stard10	ENSMUSG00000030688	-0.702173	1.80049e-06	START domain containing 10 [Source:MGI Symbol;Acc:MGI:1860093]
BC004004	ENSMUSG00000052712	0.499966	1.80223e-06	cDNA sequence BC004004 [Source:MGI Symbol;Acc:MGI:2136782]
Kmt2a	ENSMUSG00000002028	-0.456449	1.81878e-06	lysine (K)-specific methyltransferase 2A [Source:MGI Symbol;Acc:MGI:96995]
Slc25a39	ENSMUSG00000018677	0.466868	1.85843e-06	solute carrier family 25, member 39 [Source:MGI Symbol;Acc:MGI:1196386]
Osgin1	ENSMUSG00000074063	0.610891	1.8716e-06	oxidative stress induced growth inhibitor 1 [Source:MGI Symbol;Acc:MGI:1919089]
Serinc5	ENSMUSG00000021703	0.42555	1.88581e-06	serine incorporator 5 [Source:MGI Symbol;Acc:MGI:2444223]
Pak3	ENSMUSG00000031284	-0.85958	1.89789e-06	p21 (RAC1) activated kinase 3 [Source:MGI Symbol;Acc:MGI:1339656]
Gm12258	ENSMUSG00000072915	-0.687186	1.91268e-06	predicted gene 12258 [Source:MGI Symbol;Acc:MGI:3651534]
Cdipt	ENSMUSG00000030682	0.416675	1.91768e-06	CDP-diacylglycerol--inositol 3-phosphatidyltransferase (phosphatidylinositol synthase) [Source:MGI Symbol;Acc:MGI:105491]
Sec61a1	ENSMUSG00000030082	0.451451	1.92918e-06	Sec61 alpha 1 subunit (S. cerevisiae) [Source:MGI Symbol;Acc:MGI:1858417]
Bysl	ENSMUSG00000023988	0.567949	1.93035e-06	bystin-like [Source:MGI Symbol;Acc:MGI:1858419]
Sfxn4	ENSMUSG00000063698	-1.0777	1.93309e-06	sideroflexin 4 [Source:MGI Symbol;Acc:MGI:2137680]
Kpna1	ENSMUSG00000022905	0.44454	1.97456e-06	karyopherin (importin) alpha 1 [Source:MGI Symbol;Acc:MGI:103560]
Erbb2	ENSMUSG00000062312	-0.508497	1.98749e-06	erb-b2 receptor tyrosine kinase 2 [Source:MGI Symbol;Acc:MGI:95410]
Uba7	ENSMUSG00000032596	-1.43569	2.00283e-06	ubiquitin-like modifier activating enzyme 7 [Source:MGI Symbol;Acc:MGI:1349462]
Top1	ENSMUSG00000070544	0.544027	2.00532e-06	topoisomerase (DNA) I [Source:MGI Symbol;Acc:MGI:98788]
Tle4	ENSMUSG00000024642	0.844226	2.02267e-06	transducin-like enhancer of split 4 [Source:MGI Symbol;Acc:MGI:104633]
9530082P21Rik	ENSMUSG00000097006	-0.989641	2.02849e-06	RIKEN cDNA 9530082P21 gene [Source:MGI Symbol;Acc:MGI:3603340]
Tmco1	ENSMUSG00000052428	0.369156	2.06491e-06	transmembrane and coiled-coil domains 1 [Source:MGI Symbol;Acc:MGI:1921173]
Spcs1	ENSMUSG00000021917	0.411496	2.07246e-06	signal peptidase complex subunit 1 homolog (S. cerevisiae) [Source:MGI Symbol;Acc:MGI:1916269]
Pgap6	ENSMUSG00000024180	-1.12951	2.08246e-06	post-glycosylphosphatidylinositol attachment to proteins 6 [Source:MGI Symbol;Acc:MGI:1926283]
Abtb1	ENSMUSG00000030083	-0.680958	2.08552e-06	ankyrin repeat and BTB (POZ) domain containing 1 [Source:MGI Symbol;Acc:MGI:1933148]
Rpn1	ENSMUSG00000030062	0.402103	2.13471e-06	ribophorin I [Source:MGI Symbol;Acc:MGI:98084]
Traf5	ENSMUSG00000026637	-0.905724	2.15155e-06	TNF receptor-associated factor 5 [Source:MGI Symbol;Acc:MGI:107548]
Blvrb	ENSMUSG00000040466	-0.505566	2.16949e-06	biliverdin reductase B (flavin reductase (NADPH)) [Source:MGI Symbol;Acc:MGI:2385271]
Arhgef19	ENSMUSG00000028919	0.769598	2.18932e-06	Rho guanine nucleotide exchange factor (GEF) 19 [Source:MGI Symbol;Acc:MGI:1925912]
Paip1	ENSMUSG00000025451	0.386079	2.1896e-06	polyadenylate binding protein-interacting protein 1 [Source:MGI Symbol;Acc:MGI:2384993]
Gprc5b	ENSMUSG00000008734	0.664018	2.19107e-06	G protein-coupled receptor, family C, group 5, member B [Source:MGI Symbol;Acc:MGI:1927596]
Ago4	ENSMUSG00000042500	-0.774164	2.23345e-06	argonaute RISC catalytic subunit 4 [Source:MGI Symbol;Acc:MGI:1924100]
Kirrel3	ENSMUSG00000032036	2.47012	2.28517e-06	kirre like nephrin family adhesion molecule 3 [Source:MGI Symbol;Acc:MGI:1914953]	Yes
Pcsk7	ENSMUSG00000035382	0.419102	2.308e-06	proprotein convertase subtilisin/kexin type 7 [Source:MGI Symbol;Acc:MGI:107421]
Dbn1	ENSMUSG00000034675	0.4716	2.31772e-06	drebrin 1 [Source:MGI Symbol;Acc:MGI:1931838]
2410006H16Rik	ENSMUSG00000086841	-0.484906	2.3531e-06	RIKEN cDNA 2410006H16 gene [Source:MGI Symbol;Acc:MGI:1916471]
Lrrtm3	ENSMUSG00000042846	3.52086	2.36687e-06	leucine rich repeat transmembrane neuronal 3 [Source:MGI Symbol;Acc:MGI:2389177]	Yes
Klf4	ENSMUSG00000003032	-0.984351	2.37178e-06	Kruppel-like factor 4 (gut) [Source:MGI Symbol;Acc:MGI:1342287]
Ap3m1	ENSMUSG00000021824	0.392677	2.39079e-06	adaptor-related protein complex 3, mu 1 subunit [Source:MGI Symbol;Acc:MGI:1929212]
Wwp2	ENSMUSG00000031930	-0.411302	2.40342e-06	WW domain containing E3 ubiquitin protein ligase 2 [Source:MGI Symbol;Acc:MGI:1914144]
Robo1	ENSMUSG00000022883	0.641164	2.40811e-06	roundabout guidance receptor 1 [Source:MGI Symbol;Acc:MGI:1274781]
Tomm70a	ENSMUSG00000022752	0.407669	2.44735e-06	translocase of outer mitochondrial membrane 70A [Source:MGI Symbol;Acc:MGI:106295]
Tm2d1	ENSMUSG00000028563	0.451597	2.44735e-06	TM2 domain containing 1 [Source:MGI Symbol;Acc:MGI:2137022]
Dynlt1f	ENSMUSG00000095677	0.759287	2.44735e-06	dynein light chain Tctex-type 1F [Source:MGI Symbol;Acc:MGI:3780996]
Igfbp6	ENSMUSG00000023046	-0.551269	2.45514e-06	insulin-like growth factor binding protein 6 [Source:MGI Symbol;Acc:MGI:96441]
Veph1	ENSMUSG00000027831	-2.90921	2.46198e-06	ventricular zone expressed PH domain-containing 1 [Source:MGI Symbol;Acc:MGI:1920039]	Yes
Hoxc10	ENSMUSG00000022484	0.538916	2.47474e-06	homeobox C10 [Source:MGI Symbol;Acc:MGI:96192]
Fam13b	ENSMUSG00000036501	-0.408183	2.49421e-06	family with sequence similarity 13, member B [Source:MGI Symbol;Acc:MGI:2447834]
Cox11	ENSMUSG00000020544	0.885766	2.52315e-06	cytochrome c oxidase assembly protein 11, copper chaperone [Source:MGI Symbol;Acc:MGI:1917052]
Ptprn	ENSMUSG00000026204	1.05679	2.52355e-06	protein tyrosine phosphatase, receptor type, N [Source:MGI Symbol;Acc:MGI:102765]
Rrp1b	ENSMUSG00000058392	0.620601	2.53188e-06	ribosomal RNA processing 1B [Source:MGI Symbol;Acc:MGI:1919712]
Ndrg2	ENSMUSG00000004558	-0.920575	2.56086e-06	N-myc downstream regulated gene 2 [Source:MGI Symbol;Acc:MGI:1352498]
Blzf1	ENSMUSG00000026577	0.462325	2.62728e-06	basic leucine zipper nuclear factor 1 [Source:MGI Symbol;Acc:MGI:1201607]
Tpcn2	ENSMUSG00000048677	0.675405	2.64678e-06	two pore segment channel 2 [Source:MGI Symbol;Acc:MGI:2385297]
Bin1	ENSMUSG00000024381	-0.475962	2.6536e-06	bridging integrator 1 [Source:MGI Symbol;Acc:MGI:108092]
Tec	ENSMUSG00000029217	-1.13108	2.66915e-06	tec protein tyrosine kinase [Source:MGI Symbol;Acc:MGI:98662]
Cav1	ENSMUSG00000007655	-1.73886	2.67735e-06	caveolin 1, caveolae protein [Source:MGI Symbol;Acc:MGI:102709]	Yes
Chic2	ENSMUSG00000029229	0.511615	2.67735e-06	cysteine-rich hydrophobic domain 2 [Source:MGI Symbol;Acc:MGI:1921527]
Txndc15	ENSMUSG00000021497	0.4344	2.70502e-06	thioredoxin domain containing 15 [Source:MGI Symbol;Acc:MGI:1916922]
E2f6	ENSMUSG00000057469	0.518469	2.71564e-06	E2F transcription factor 6 [Source:MGI Symbol;Acc:MGI:1354159]
Inka1	ENSMUSG00000042106	-1.17665	2.74146e-06	inka box actin regulator 1 [Source:MGI Symbol;Acc:MGI:1915426]
Insc	ENSMUSG00000048782	-2.55823	2.76211e-06	INSC spindle orientation adaptor protein [Source:MGI Symbol;Acc:MGI:1917942]	Yes
Ctsl	ENSMUSG00000021477	0.745974	2.77971e-06	cathepsin L [Source:MGI Symbol;Acc:MGI:88564]
ENSMUSG00000029386	ENSMUSG00000029386	-0.524183	2.78041e-06	NA
Lmod1	ENSMUSG00000048096	-1.69035	2.78041e-06	leiomodin 1 (smooth muscle) [Source:MGI Symbol;Acc:MGI:2135671]	Yes
Gm3788	ENSMUSG00000094392	0.609553	2.78744e-06	predicted gene 3788 [Source:MGI Symbol;Acc:MGI:3781961]
Gm10222	ENSMUSG00000067736	0.444062	2.79668e-06	predicted gene 10222 [Source:MGI Symbol;Acc:MGI:3642643]
Nadk	ENSMUSG00000029063	0.44758	2.82196e-06	NAD kinase [Source:MGI Symbol;Acc:MGI:2183149]
Zkscan16	ENSMUSG00000038630	-2.4655	2.82196e-06	zinc finger with KRAB and SCAN domains 16 [Source:MGI Symbol;Acc:MGI:3510405]	Yes
Maged1	ENSMUSG00000025151	0.405529	2.83664e-06	MAGE family member D1 [Source:MGI Symbol;Acc:MGI:1930187]
Pml	ENSMUSG00000036986	-0.442504	2.83664e-06	promyelocytic leukemia [Source:MGI Symbol;Acc:MGI:104662]
Bbs9	ENSMUSG00000035919	-0.613495	2.90827e-06	Bardet-Biedl syndrome 9 (human) [Source:MGI Symbol;Acc:MGI:2442833]
Srgn	ENSMUSG00000020077	1.1262	2.93229e-06	serglycin [Source:MGI Symbol;Acc:MGI:97756]
Slc16a4	ENSMUSG00000027896	0.943651	2.95282e-06	solute carrier family 16 (monocarboxylic acid transporters), member 4 [Source:MGI Symbol;Acc:MGI:2385183]
Armcx3	ENSMUSG00000049047	0.454624	2.95613e-06	armadillo repeat containing, X-linked 3 [Source:MGI Symbol;Acc:MGI:1918953]
ENSMUSG00000043498	ENSMUSG00000043498	1.65738	2.96265e-06	NA	Yes
Psd3	ENSMUSG00000030465	0.475836	2.98907e-06	pleckstrin and Sec7 domain containing 3 [Source:MGI Symbol;Acc:MGI:1918215]
3930402G23Rik	ENSMUSG00000038917	5.05488	3.01288e-06	RIKEN cDNA 3930402G23 gene [Source:MGI Symbol;Acc:MGI:1921277]	Yes
Tmem214	ENSMUSG00000038828	0.469656	3.03914e-06	transmembrane protein 214 [Source:MGI Symbol;Acc:MGI:1916046]
Adipoq	ENSMUSG00000022878	-2.81991	3.07648e-06	adiponectin, C1Q and collagen domain containing [Source:MGI Symbol;Acc:MGI:106675]	Yes
Pidd1	ENSMUSG00000025507	-0.689414	3.08034e-06	p53 induced death domain protein 1 [Source:MGI Symbol;Acc:MGI:1889507]
Cnih4	ENSMUSG00000062169	0.417043	3.15905e-06	cornichon family AMPA receptor auxiliary protein 4 [Source:MGI Symbol;Acc:MGI:1925828]
Hykk	ENSMUSG00000035878	-0.668409	3.16453e-06	hydroxylysine kinase 1 [Source:MGI Symbol;Acc:MGI:2443139]
Gde1	ENSMUSG00000033917	0.460275	3.25438e-06	glycerophosphodiester phosphodiesterase 1 [Source:MGI Symbol;Acc:MGI:1891827]
Fam162a	ENSMUSG00000003955	0.489476	3.26391e-06	family with sequence similarity 162, member A [Source:MGI Symbol;Acc:MGI:1917436]
Slc2a6	ENSMUSG00000036067	-1.27948	3.31157e-06	solute carrier family 2 (facilitated glucose transporter), member 6 [Source:MGI Symbol;Acc:MGI:2443286]
Cog6	ENSMUSG00000027742	0.383748	3.3545e-06	component of oligomeric golgi complex 6 [Source:MGI Symbol;Acc:MGI:1914792]
Rxra	ENSMUSG00000015846	-0.363035	3.40019e-06	retinoid X receptor alpha [Source:MGI Symbol;Acc:MGI:98214]
Arhgap20	ENSMUSG00000053199	-2.12899	3.40198e-06	Rho GTPase activating protein 20 [Source:MGI Symbol;Acc:MGI:2445175]	Yes
Tmed3	ENSMUSG00000032353	0.487377	3.52725e-06	transmembrane p24 trafficking protein 3 [Source:MGI Symbol;Acc:MGI:1913361]
Ap3m2	ENSMUSG00000031539	-0.47572	3.53483e-06	adaptor-related protein complex 3, mu 2 subunit [Source:MGI Symbol;Acc:MGI:1929214]
Rgs7	ENSMUSG00000026527	2.26679	3.64352e-06	regulator of G protein signaling 7 [Source:MGI Symbol;Acc:MGI:1346089]	Yes
Reep6	ENSMUSG00000035504	-2.14374	3.6884e-06	receptor accessory protein 6 [Source:MGI Symbol;Acc:MGI:1917585]	Yes
Purb	ENSMUSG00000094483	0.394188	3.68851e-06	purine rich element binding protein B [Source:MGI Symbol;Acc:MGI:1338779]
Serpinb8	ENSMUSG00000026315	-1.3481	3.74813e-06	serine (or cysteine) peptidase inhibitor, clade B, member 8 [Source:MGI Symbol;Acc:MGI:894657]
Astn2	ENSMUSG00000028373	1.09126	3.91568e-06	astrotactin 2 [Source:MGI Symbol;Acc:MGI:1889277]
Zbtb20	ENSMUSG00000022708	0.431709	3.95211e-06	zinc finger and BTB domain containing 20 [Source:MGI Symbol;Acc:MGI:1929213]
H2-T23	ENSMUSG00000067212	-0.428333	3.95211e-06	histocompatibility 2, T region locus 23 [Source:MGI Symbol;Acc:MGI:95957]
Wdr19	ENSMUSG00000037890	-0.450458	3.97635e-06	WD repeat domain 19 [Source:MGI Symbol;Acc:MGI:2443231]
Nrip2	ENSMUSG00000001520	-3.76174	4.06389e-06	nuclear receptor interacting protein 2 [Source:MGI Symbol;Acc:MGI:1891884]	Yes
Pax1	ENSMUSG00000037034	1.54238	4.06389e-06	paired box 1 [Source:MGI Symbol;Acc:MGI:97485]	Yes
Lrp11	ENSMUSG00000019796	-0.575403	4.15421e-06	low density lipoprotein receptor-related protein 11 [Source:MGI Symbol;Acc:MGI:2442989]
Tdrkh	ENSMUSG00000041912	-1.68954	4.16328e-06	tudor and KH domain containing protein [Source:MGI Symbol;Acc:MGI:1919884]	Yes
Tctn1	ENSMUSG00000038593	-0.441914	4.16375e-06	tectonic family member 1 [Source:MGI Symbol;Acc:MGI:3603820]
Micall2	ENSMUSG00000036718	-0.668522	4.26901e-06	MICAL-like 2 [Source:MGI Symbol;Acc:MGI:2444818]
Mast2	ENSMUSG00000003810	0.463719	4.27199e-06	microtubule associated serine/threonine kinase 2 [Source:MGI Symbol;Acc:MGI:894676]
Mdh2	ENSMUSG00000019179	0.366211	4.28896e-06	malate dehydrogenase 2, NAD (mitochondrial) [Source:MGI Symbol;Acc:MGI:97050]
Ephb2	ENSMUSG00000028664	0.7074	4.33411e-06	Eph receptor B2 [Source:MGI Symbol;Acc:MGI:99611]
Svop	ENSMUSG00000042078	-1.2379	4.36e-06	SV2 related protein [Source:MGI Symbol;Acc:MGI:1915916]
Iqce	ENSMUSG00000036555	-0.471068	4.38305e-06	IQ motif containing E [Source:MGI Symbol;Acc:MGI:1921489]
Pard3b	ENSMUSG00000052062	-0.704428	4.38614e-06	par-3 family cell polarity regulator beta [Source:MGI Symbol;Acc:MGI:1919301]
Sec11a	ENSMUSG00000025724	0.395265	4.4183e-06	SEC11 homolog A, signal peptidase complex subunit [Source:MGI Symbol;Acc:MGI:1929464]
Tspan6	ENSMUSG00000067377	-0.399962	4.44673e-06	tetraspanin 6 [Source:MGI Symbol;Acc:MGI:1926264]
Sox5	ENSMUSG00000041540	-0.812036	4.44982e-06	SRY (sex determining region Y)-box 5 [Source:MGI Symbol;Acc:MGI:98367]
Gpr180	ENSMUSG00000022131	0.447297	4.47053e-06	G protein-coupled receptor 180 [Source:MGI Symbol;Acc:MGI:1930949]
Zfp207	ENSMUSG00000017421	0.323697	4.48371e-06	zinc finger protein 207 [Source:MGI Symbol;Acc:MGI:1340045]
Nagk	ENSMUSG00000034744	-0.424545	4.48371e-06	N-acetylglucosamine kinase [Source:MGI Symbol;Acc:MGI:1860418]
Thbs3	ENSMUSG00000028047	0.766831	4.49434e-06	thrombospondin 3 [Source:MGI Symbol;Acc:MGI:98739]
1110065P20Rik	ENSMUSG00000078570	0.54272	4.53357e-06	RIKEN cDNA 1110065P20 gene [Source:MGI Symbol;Acc:MGI:1916170]
Timp3	ENSMUSG00000020044	-1.78636	4.56883e-06	tissue inhibitor of metalloproteinase 3 [Source:MGI Symbol;Acc:MGI:98754]	Yes
Agpat5	ENSMUSG00000031467	0.471137	4.58445e-06	1-acylglycerol-3-phosphate O-acyltransferase 5 (lysophosphatidic acid acyltransferase, epsilon) [Source:MGI Symbol;Acc:MGI:1196345]
Aldh1a7	ENSMUSG00000024747	-3.24066	4.63047e-06	aldehyde dehydrogenase family 1, subfamily A7 [Source:MGI Symbol;Acc:MGI:1347050]	Yes
Sgms2	ENSMUSG00000050931	0.557979	4.66981e-06	sphingomyelin synthase 2 [Source:MGI Symbol;Acc:MGI:1921692]
Rgs10	ENSMUSG00000030844	-0.486092	4.6857e-06	regulator of G-protein signalling 10 [Source:MGI Symbol;Acc:MGI:1915115]
Sertad2	ENSMUSG00000049800	-0.535968	4.6857e-06	SERTA domain containing 2 [Source:MGI Symbol;Acc:MGI:1931026]
Amer1	ENSMUSG00000050332	-0.582561	4.71356e-06	APC membrane recruitment 1 [Source:MGI Symbol;Acc:MGI:1919595]
Foxs1	ENSMUSG00000074676	-1.05333	4.71453e-06	forkhead box S1 [Source:MGI Symbol;Acc:MGI:95546]
Steap4	ENSMUSG00000012428	-2.0173	4.72651e-06	STEAP family member 4 [Source:MGI Symbol;Acc:MGI:1923560]	Yes
Zfp853	ENSMUSG00000093910	-2.06082	4.82201e-06	zinc finger protein 853 [Source:MGI Symbol;Acc:MGI:2685638]	Yes
Lama1	ENSMUSG00000032796	1.8973	4.83436e-06	laminin, alpha 1 [Source:MGI Symbol;Acc:MGI:99892]	Yes
Ppp4r1l-ps	ENSMUSG00000055897	-0.623157	4.8401e-06	protein phosphatase 4, regulatory subunit 1-like, pseudogene [Source:MGI Symbol;Acc:MGI:1924560]
Rapgef6	ENSMUSG00000037533	-0.448553	4.84913e-06	Rap guanine nucleotide exchange factor (GEF) 6 [Source:MGI Symbol;Acc:MGI:2384761]
Psmb7	ENSMUSG00000026750	0.391148	4.85648e-06	proteasome (prosome, macropain) subunit, beta type 7 [Source:MGI Symbol;Acc:MGI:107637]
Prickle2	ENSMUSG00000030020	0.444868	4.9182e-06	prickle planar cell polarity protein 2 [Source:MGI Symbol;Acc:MGI:1925144]
Lrig1	ENSMUSG00000030029	0.697305	4.9182e-06	leucine-rich repeats and immunoglobulin-like domains 1 [Source:MGI Symbol;Acc:MGI:107935]
Ctdspl	ENSMUSG00000047409	-0.602004	4.9502e-06	CTD (carboxy-terminal domain, RNA polymerase II, polypeptide A) small phosphatase-like [Source:MGI Symbol;Acc:MGI:1916524]
Lrrcc1	ENSMUSG00000027550	-0.588303	4.95937e-06	leucine rich repeat and coiled-coil domain containing 1 [Source:MGI Symbol;Acc:MGI:1918960]
Scarb1	ENSMUSG00000037936	-1.0245	5.04671e-06	scavenger receptor class B, member 1 [Source:MGI Symbol;Acc:MGI:893578]
Slc39a14	ENSMUSG00000022094	0.826491	5.14193e-06	solute carrier family 39 (zinc transporter), member 14 [Source:MGI Symbol;Acc:MGI:2384851]
Fermt2	ENSMUSG00000037712	0.352086	5.18096e-06	fermitin family member 2 [Source:MGI Symbol;Acc:MGI:2385001]
Hapln4	ENSMUSG00000007594	2.0553	5.18766e-06	hyaluronan and proteoglycan link protein 4 [Source:MGI Symbol;Acc:MGI:2679531]	Yes
Rflnb	ENSMUSG00000020846	-1.94934	5.23371e-06	refilin B [Source:MGI Symbol;Acc:MGI:1923816]	Yes
Lzts2	ENSMUSG00000035342	-0.390312	5.23371e-06	leucine zipper, putative tumor suppressor 2 [Source:MGI Symbol;Acc:MGI:2385095]
Atp7a	ENSMUSG00000033792	0.49766	5.24153e-06	ATPase, Cu++ transporting, alpha polypeptide [Source:MGI Symbol;Acc:MGI:99400]
Metap1d	ENSMUSG00000041921	-0.679145	5.25755e-06	methionyl aminopeptidase type 1D (mitochondrial) [Source:MGI Symbol;Acc:MGI:1913809]
Hmbox1	ENSMUSG00000021972	0.470472	5.27849e-06	homeobox containing 1 [Source:MGI Symbol;Acc:MGI:2445066]
Sec61b	ENSMUSG00000053317	0.396003	5.27851e-06	Sec61 beta subunit [Source:MGI Symbol;Acc:MGI:1913462]
Cdc7	ENSMUSG00000029283	0.939971	5.28066e-06	cell division cycle 7 (S. cerevisiae) [Source:MGI Symbol;Acc:MGI:1309511]
Gdnf	ENSMUSG00000022144	-1.16874	5.2807e-06	glial cell line derived neurotrophic factor [Source:MGI Symbol;Acc:MGI:107430]
Baiap2	ENSMUSG00000025372	-0.540194	5.28835e-06	brain-specific angiogenesis inhibitor 1-associated protein 2 [Source:MGI Symbol;Acc:MGI:2137336]
Ppt2	ENSMUSG00000015474	0.653131	5.29681e-06	palmitoyl-protein thioesterase 2 [Source:MGI Symbol;Acc:MGI:1860075]
Stard8	ENSMUSG00000031216	-0.89694	5.39714e-06	START domain containing 8 [Source:MGI Symbol;Acc:MGI:2448556]
Slc25a27	ENSMUSG00000023912	-1.18469	5.43259e-06	solute carrier family 25, member 27 [Source:MGI Symbol;Acc:MGI:1921261]
Akap11	ENSMUSG00000022016	0.475118	5.46543e-06	A kinase (PRKA) anchor protein 11 [Source:MGI Symbol;Acc:MGI:2684060]
Nhsl2	ENSMUSG00000079481	-0.572147	5.48994e-06	NHS-like 2 [Source:MGI Symbol;Acc:MGI:3645090]
Man2c1	ENSMUSG00000032295	-0.484578	5.50071e-06	mannosidase, alpha, class 2C, member 1 [Source:MGI Symbol;Acc:MGI:1920994]
Tspan2	ENSMUSG00000027858	-1.43695	5.56148e-06	tetraspanin 2 [Source:MGI Symbol;Acc:MGI:1917997]
Slc35a1	ENSMUSG00000028293	0.415616	5.59188e-06	solute carrier family 35 (CMP-sialic acid transporter), member 1 [Source:MGI Symbol;Acc:MGI:1345622]
Cspg4b	ENSMUSG00000021763	-0.779395	5.60784e-06	chondroitin sulfate proteoglycan 4B [Source:MGI Symbol;Acc:MGI:3040697]
Cct7	ENSMUSG00000030007	0.384628	5.63588e-06	chaperonin containing Tcp1, subunit 7 (eta) [Source:MGI Symbol;Acc:MGI:107184]
Txlna	ENSMUSG00000053841	0.325819	5.63588e-06	taxilin alpha [Source:MGI Symbol;Acc:MGI:105968]
Ric1	ENSMUSG00000038658	0.413332	5.65742e-06	RAB6A GEF complex partner 1 [Source:MGI Symbol;Acc:MGI:1924893]
Zcchc14	ENSMUSG00000061410	-0.366795	5.67183e-06	zinc finger, CCHC domain containing 14 [Source:MGI Symbol;Acc:MGI:2159407]
Rgs11	ENSMUSG00000024186	-1.37291	5.73905e-06	regulator of G-protein signaling 11 [Source:MGI Symbol;Acc:MGI:1354739]
Vgf	ENSMUSG00000037428	-2.12073	5.76768e-06	VGF nerve growth factor inducible [Source:MGI Symbol;Acc:MGI:1343180]	Yes
Slc25a51	ENSMUSG00000045973	0.525012	5.87421e-06	solute carrier family 25, member 51 [Source:MGI Symbol;Acc:MGI:2684984]
B3gat3	ENSMUSG00000071649	0.425358	5.87857e-06	beta-1,3-glucuronyltransferase 3 (glucuronosyltransferase I) [Source:MGI Symbol;Acc:MGI:1919977]
1700003M07Rik	ENSMUSG00000085389	-1.76856	5.89977e-06	RIKEN cDNA 1700003M07 gene [Source:MGI Symbol;Acc:MGI:1919475]	Yes
Tlr3	ENSMUSG00000031639	-0.640807	5.90607e-06	toll-like receptor 3 [Source:MGI Symbol;Acc:MGI:2156367]
Edar	ENSMUSG00000003227	-3.15743	5.95814e-06	ectodysplasin-A receptor [Source:MGI Symbol;Acc:MGI:1343498]	Yes
Cacna1h	ENSMUSG00000024112	-1.39338	5.97434e-06	calcium channel, voltage-dependent, T type, alpha 1H subunit [Source:MGI Symbol;Acc:MGI:1928842]
Rnf144b	ENSMUSG00000038068	-1.48166	5.98346e-06	ring finger protein 144B [Source:MGI Symbol;Acc:MGI:2384986]
Gsdmd	ENSMUSG00000022575	-0.830724	5.99064e-06	gasdermin D [Source:MGI Symbol;Acc:MGI:1916396]
Gtf2e2	ENSMUSG00000031585	0.535547	6.02856e-06	general transcription factor II E, polypeptide 2 (beta subunit) [Source:MGI Symbol;Acc:MGI:1915403]
Kazn	ENSMUSG00000040606	-1.17658	6.02856e-06	kazrin, periplakin interacting protein [Source:MGI Symbol;Acc:MGI:1918779]
Nlrc5	ENSMUSG00000074151	-0.929136	6.02856e-06	NLR family, CARD domain containing 5 [Source:MGI Symbol;Acc:MGI:3612191]
Akr1e1	ENSMUSG00000045410	-0.43779	6.06524e-06	aldo-keto reductase family 1, member E1 [Source:MGI Symbol;Acc:MGI:1914758]
Atp6v0b	ENSMUSG00000033379	0.366089	6.09001e-06	ATPase, H+ transporting, lysosomal V0 subunit B [Source:MGI Symbol;Acc:MGI:1890510]
Stimate	ENSMUSG00000006526	0.463211	6.11064e-06	STIM activating enhancer [Source:MGI Symbol;Acc:MGI:1921500]
Ptpn14	ENSMUSG00000026604	-0.373237	6.11064e-06	protein tyrosine phosphatase, non-receptor type 14 [Source:MGI Symbol;Acc:MGI:102467]
St14	ENSMUSG00000031995	-1.61479	6.1252e-06	suppression of tumorigenicity 14 (colon carcinoma) [Source:MGI Symbol;Acc:MGI:1338881]	Yes
Ehd1	ENSMUSG00000024772	0.441156	6.25357e-06	EH-domain containing 1 [Source:MGI Symbol;Acc:MGI:1341878]
Stc2	ENSMUSG00000020303	-2.69439	6.27615e-06	stanniocalcin 2 [Source:MGI Symbol;Acc:MGI:1316731]	Yes
Clec4n	ENSMUSG00000023349	-0.926311	6.32176e-06	C-type lectin domain family 4, member n [Source:MGI Symbol;Acc:MGI:1861231]
Mycbp	ENSMUSG00000028647	0.628941	6.32555e-06	MYC binding protein [Source:MGI Symbol;Acc:MGI:1891750]
Pced1a	ENSMUSG00000037773	-0.417234	6.33254e-06	PC-esterase domain containing 1A [Source:MGI Symbol;Acc:MGI:2442177]
Pld5	ENSMUSG00000055214	3.16274	6.33923e-06	phospholipase D family, member 5 [Source:MGI Symbol;Acc:MGI:2442056]	Yes
Lgalsl	ENSMUSG00000042363	-0.652707	6.36569e-06	lectin, galactoside binding-like [Source:MGI Symbol;Acc:MGI:1916114]
Eif4a1	ENSMUSG00000059796	0.41076	6.44985e-06	eukaryotic translation initiation factor 4A1 [Source:MGI Symbol;Acc:MGI:95303]
Trp53cor1	ENSMUSG00000085912	-1.34208	6.45409e-06	tumor protein p53 pathway corepressor 1 [Source:MGI Symbol;Acc:MGI:3801771]
S100a7a	ENSMUSG00000063767	-1.52035	6.50249e-06	S100 calcium binding protein A7A [Source:MGI Symbol;Acc:MGI:2687194]	Yes
Plag1	ENSMUSG00000003282	-0.851987	6.51179e-06	pleiomorphic adenoma gene 1 [Source:MGI Symbol;Acc:MGI:1891916]
Mmgt2	ENSMUSG00000048497	-0.512823	6.52682e-06	membrane magnesium transporter 2 [Source:MGI Symbol;Acc:MGI:2448491]
Akap13	ENSMUSG00000066406	0.430626	6.60506e-06	A kinase (PRKA) anchor protein 13 [Source:MGI Symbol;Acc:MGI:2676556]
Spast	ENSMUSG00000024068	0.450972	6.63233e-06	spastin [Source:MGI Symbol;Acc:MGI:1858896]
Tlr2	ENSMUSG00000027995	-0.46834	6.64596e-06	toll-like receptor 2 [Source:MGI Symbol;Acc:MGI:1346060]
Cebpb	ENSMUSG00000056501	0.549694	6.68243e-06	CCAAT/enhancer binding protein (C/EBP), beta [Source:MGI Symbol;Acc:MGI:88373]
Gnl2	ENSMUSG00000028869	0.397165	6.78854e-06	guanine nucleotide binding protein-like 2 (nucleolar) [Source:MGI Symbol;Acc:MGI:2385207]
Rp9	ENSMUSG00000032239	-0.542394	6.82457e-06	retinitis pigmentosa 9 (human) [Source:MGI Symbol;Acc:MGI:2157166]
Tle3	ENSMUSG00000032280	-0.441689	6.85454e-06	transducin-like enhancer of split 3 [Source:MGI Symbol;Acc:MGI:104634]
Tlr5	ENSMUSG00000079164	-0.77164	6.90101e-06	toll-like receptor 5 [Source:MGI Symbol;Acc:MGI:1858171]
Glyat	ENSMUSG00000063683	2.64702	7.00856e-06	glycine-N-acyltransferase [Source:MGI Symbol;Acc:MGI:2147502]	Yes
Ahcyl2	ENSMUSG00000029772	0.473064	7.07511e-06	S-adenosylhomocysteine hydrolase-like 2 [Source:MGI Symbol;Acc:MGI:1921590]
Trim21	ENSMUSG00000030966	-0.57727	7.07511e-06	tripartite motif-containing 21 [Source:MGI Symbol;Acc:MGI:106657]
Cul9	ENSMUSG00000040327	-0.452457	7.09403e-06	cullin 9 [Source:MGI Symbol;Acc:MGI:1925559]
Ssr1	ENSMUSG00000021427	0.317877	7.10382e-06	signal sequence receptor, alpha [Source:MGI Symbol;Acc:MGI:105082]
ENSMUSG00000097971	ENSMUSG00000097971	0.857265	7.10382e-06	NA
Ifit3	ENSMUSG00000074896	-0.791614	7.11374e-06	interferon-induced protein with tetratricopeptide repeats 3 [Source:MGI Symbol;Acc:MGI:1101055]
Xaf1	ENSMUSG00000040483	-0.774062	7.20628e-06	XIAP associated factor 1 [Source:MGI Symbol;Acc:MGI:3772572]
Vmp1	ENSMUSG00000018171	-0.309752	7.3628e-06	vacuole membrane protein 1 [Source:MGI Symbol;Acc:MGI:1923159]
Pitx1	ENSMUSG00000021506	0.705828	7.3628e-06	paired-like homeodomain transcription factor 1 [Source:MGI Symbol;Acc:MGI:107374]
Xdh	ENSMUSG00000024066	0.47379	7.38173e-06	xanthine dehydrogenase [Source:MGI Symbol;Acc:MGI:98973]
Mapk8ip3	ENSMUSG00000024163	-0.513061	7.38173e-06	mitogen-activated protein kinase 8 interacting protein 3 [Source:MGI Symbol;Acc:MGI:1353598]
Ddx51	ENSMUSG00000029504	-0.582089	7.45859e-06	DEAD box helicase 51 [Source:MGI Symbol;Acc:MGI:1916913]
Aph1b	ENSMUSG00000032375	0.619121	7.50537e-06	aph1 homolog B, gamma secretase subunit [Source:MGI Symbol;Acc:MGI:3522097]
Klhl5	ENSMUSG00000054920	-0.49482	7.52401e-06	kelch-like 5 [Source:MGI Symbol;Acc:MGI:1919028]
Galnt13	ENSMUSG00000060988	-1.05059	7.56697e-06	polypeptide N-acetylgalactosaminyltransferase 13 [Source:MGI Symbol;Acc:MGI:2139447]
Gm15987	ENSMUSG00000085786	-1.47461	7.69213e-06	predicted gene 15987 [Source:MGI Symbol;Acc:MGI:3801849]
Exoc5	ENSMUSG00000061244	0.390984	7.7006e-06	exocyst complex component 5 [Source:MGI Symbol;Acc:MGI:2145645]
Vhl	ENSMUSG00000033933	0.553522	7.77092e-06	von Hippel-Lindau tumor suppressor [Source:MGI Symbol;Acc:MGI:103223]
Rnf19b	ENSMUSG00000028793	0.460584	7.77272e-06	ring finger protein 19B [Source:MGI Symbol;Acc:MGI:1922484]
Gm4951	ENSMUSG00000073555	-1.49616	7.86093e-06	predicted gene 4951 [Source:MGI Symbol;Acc:MGI:3644953]
Nagpa	ENSMUSG00000023143	-0.464124	7.97545e-06	N-acetylglucosamine-1-phosphodiester alpha-N-acetylglucosaminidase [Source:MGI Symbol;Acc:MGI:1351598]
Mgat4a	ENSMUSG00000026110	0.982233	8.01345e-06	mannoside acetylglucosaminyltransferase 4, isoenzyme A [Source:MGI Symbol;Acc:MGI:2662992]
Fzd7	ENSMUSG00000041075	0.432912	8.02113e-06	frizzled class receptor 7 [Source:MGI Symbol;Acc:MGI:108570]
Pno1	ENSMUSG00000020116	0.459181	8.10051e-06	partner of NOB1 homolog [Source:MGI Symbol;Acc:MGI:1913499]
Fhip1a	ENSMUSG00000051000	-0.972333	8.10811e-06	FHF complex subunit HOOK interacting protein 1A [Source:MGI Symbol;Acc:MGI:2444746]
Cbwd1	ENSMUSG00000024878	0.634845	8.12322e-06	COBW domain containing 1 [Source:MGI Symbol;Acc:MGI:2385089]
Ptpn3	ENSMUSG00000038764	-0.996459	8.14945e-06	protein tyrosine phosphatase, non-receptor type 3 [Source:MGI Symbol;Acc:MGI:105307]
Phyh	ENSMUSG00000026664	-0.499153	8.31018e-06	phytanoyl-CoA hydroxylase [Source:MGI Symbol;Acc:MGI:891978]
Apc2	ENSMUSG00000020135	-0.685472	8.33736e-06	APC regulator of WNT signaling pathway 2 [Source:MGI Symbol;Acc:MGI:1346052]
Stab2	ENSMUSG00000035459	-1.7834	8.33955e-06	stabilin 2 [Source:MGI Symbol;Acc:MGI:2178743]	Yes
Cacna1a	ENSMUSG00000034656	-0.927177	8.36387e-06	calcium channel, voltage-dependent, P/Q type, alpha 1A subunit [Source:MGI Symbol;Acc:MGI:109482]
Agpat1	ENSMUSG00000034254	0.412744	8.38945e-06	1-acylglycerol-3-phosphate O-acyltransferase 1 (lysophosphatidic acid acyltransferase, alpha) [Source:MGI Symbol;Acc:MGI:1932075]
Clptm1l	ENSMUSG00000021610	0.432782	8.42836e-06	CLPTM1-like [Source:MGI Symbol;Acc:MGI:2442892]
Ankrd13c	ENSMUSG00000039988	0.507377	8.46498e-06	ankyrin repeat domain 13c [Source:MGI Symbol;Acc:MGI:2139746]
Ache	ENSMUSG00000023328	-2.61436	8.52811e-06	acetylcholinesterase [Source:MGI Symbol;Acc:MGI:87876]	Yes
Pcdhga3	ENSMUSG00000104346	0.625401	8.59211e-06	protocadherin gamma subfamily A, 3 [Source:MGI Symbol;Acc:MGI:1935215]
Asb1	ENSMUSG00000026311	0.46964	8.62917e-06	ankyrin repeat and SOCS box-containing 1 [Source:MGI Symbol;Acc:MGI:1929735]
Edn1	ENSMUSG00000021367	-4.03182	8.64054e-06	endothelin 1 [Source:MGI Symbol;Acc:MGI:95283]	Yes
Galnt11	ENSMUSG00000038072	0.407715	8.66384e-06	polypeptide N-acetylgalactosaminyltransferase 11 [Source:MGI Symbol;Acc:MGI:2444392]
Nrbp1	ENSMUSG00000029148	0.355783	8.77905e-06	nuclear receptor binding protein 1 [Source:MGI Symbol;Acc:MGI:2183436]
Zyx	ENSMUSG00000029860	-0.696197	8.77905e-06	zyxin [Source:MGI Symbol;Acc:MGI:103072]
Crebl2	ENSMUSG00000032652	-0.576228	8.86543e-06	cAMP responsive element binding protein-like 2 [Source:MGI Symbol;Acc:MGI:1889385]
Rtl5	ENSMUSG00000049191	-0.684523	8.86543e-06	retrotransposon Gag like 5 [Source:MGI Symbol;Acc:MGI:3045324]
Pbx3	ENSMUSG00000038718	0.565125	8.87963e-06	pre B cell leukemia homeobox 3 [Source:MGI Symbol;Acc:MGI:97496]
Slc35a2	ENSMUSG00000031156	0.441879	8.91046e-06	solute carrier family 35 (UDP-galactose transporter), member A2 [Source:MGI Symbol;Acc:MGI:1345297]
Tmem158	ENSMUSG00000054871	-1.33367	9.0434e-06	transmembrane protein 158 [Source:MGI Symbol;Acc:MGI:1919559]
Sult1a1	ENSMUSG00000030711	-2.81553	9.06482e-06	sulfotransferase family 1A, phenol-preferring, member 1 [Source:MGI Symbol;Acc:MGI:102896]	Yes
Cobll1	ENSMUSG00000034903	-0.588184	9.08153e-06	Cobl-like 1 [Source:MGI Symbol;Acc:MGI:2442894]
Trappc3	ENSMUSG00000028847	0.39716	9.15644e-06	trafficking protein particle complex 3 [Source:MGI Symbol;Acc:MGI:1351486]
Rap1gap2	ENSMUSG00000038807	0.629307	9.18559e-06	RAP1 GTPase activating protein 2 [Source:MGI Symbol;Acc:MGI:3028623]
Chpf2	ENSMUSG00000038181	0.475651	9.1995e-06	chondroitin polymerizing factor 2 [Source:MGI Symbol;Acc:MGI:1917522]
Strn4	ENSMUSG00000030374	0.413541	9.28525e-06	striatin, calmodulin binding protein 4 [Source:MGI Symbol;Acc:MGI:2142346]
Rcc2	ENSMUSG00000040945	0.448108	9.43102e-06	regulator of chromosome condensation 2 [Source:MGI Symbol;Acc:MGI:1919784]
Fcer1g	ENSMUSG00000058715	-0.767386	9.43102e-06	Fc receptor, IgE, high affinity I, gamma polypeptide [Source:MGI Symbol;Acc:MGI:95496]
Gpr88	ENSMUSG00000068696	-0.953924	9.48657e-06	G-protein coupled receptor 88 [Source:MGI Symbol;Acc:MGI:1927653]
Dpysl2	ENSMUSG00000022048	-0.697984	9.53065e-06	dihydropyrimidinase-like 2 [Source:MGI Symbol;Acc:MGI:1349763]
Srgap3	ENSMUSG00000030257	-0.384533	9.53287e-06	SLIT-ROBO Rho GTPase activating protein 3 [Source:MGI Symbol;Acc:MGI:2152938]
Galnt15	ENSMUSG00000021903	-4.28674	9.56959e-06	polypeptide N-acetylgalactosaminyltransferase 15 [Source:MGI Symbol;Acc:MGI:1926004]	Yes
Lnx2	ENSMUSG00000016520	0.814962	9.57083e-06	ligand of numb-protein X 2 [Source:MGI Symbol;Acc:MGI:2155959]
Tmem192	ENSMUSG00000025521	-0.486448	9.75535e-06	transmembrane protein 192 [Source:MGI Symbol;Acc:MGI:1920317]
Syne2	ENSMUSG00000063450	-1.00245	9.75535e-06	spectrin repeat containing, nuclear envelope 2 [Source:MGI Symbol;Acc:MGI:2449316]
Slc20a1	ENSMUSG00000027397	-0.722923	9.76659e-06	solute carrier family 20, member 1 [Source:MGI Symbol;Acc:MGI:108392]
Ube2k	ENSMUSG00000029203	0.362936	9.85352e-06	ubiquitin-conjugating enzyme E2K [Source:MGI Symbol;Acc:MGI:1858216]
Izumo4	ENSMUSG00000055862	-0.537445	9.85352e-06	IZUMO family member 4 [Source:MGI Symbol;Acc:MGI:1918814]
Usp13	ENSMUSG00000056900	-0.895621	9.85944e-06	ubiquitin specific peptidase 13 (isopeptidase T-3) [Source:MGI Symbol;Acc:MGI:1919857]
Clec3b	ENSMUSG00000025784	-3.69098	9.88878e-06	C-type lectin domain family 3, member b [Source:MGI Symbol;Acc:MGI:104540]	Yes
Galnt9	ENSMUSG00000033316	-4.1245	9.89864e-06	polypeptide N-acetylgalactosaminyltransferase 9 [Source:MGI Symbol;Acc:MGI:2677965]	Yes
Arf4	ENSMUSG00000021877	0.396836	1.0035e-05	ADP-ribosylation factor 4 [Source:MGI Symbol;Acc:MGI:99433]
Amigo1	ENSMUSG00000050947	-0.792143	1.00735e-05	adhesion molecule with Ig like domain 1 [Source:MGI Symbol;Acc:MGI:2653612]
Trdc	ENSMUSG00000104876	6.31527	1.00735e-05	T cell receptor delta, constant region [Source:MGI Symbol;Acc:MGI:98612]	Yes
Gm43618	ENSMUSG00000105403	0.975913	1.01689e-05	predicted gene 43618 [Source:MGI Symbol;Acc:MGI:5663755]
Lrrc75b	ENSMUSG00000046807	-1.22792	1.02408e-05	leucine rich repeat containing 75B [Source:MGI Symbol;Acc:MGI:2143657]
Gm42793	ENSMUSG00000105954	-2.40397	1.02408e-05	predicted gene 42793 [Source:MGI Symbol;Acc:MGI:5662930]	Yes
Cds2	ENSMUSG00000058793	-0.370915	1.04206e-05	CDP-diacylglycerol synthase (phosphatidate cytidylyltransferase) 2 [Source:MGI Symbol;Acc:MGI:1332236]
Dennd2c	ENSMUSG00000007379	-0.572857	1.04347e-05	DENN/MADD domain containing 2C [Source:MGI Symbol;Acc:MGI:3036254]
Rtn3	ENSMUSG00000024758	0.377498	1.04743e-05	reticulon 3 [Source:MGI Symbol;Acc:MGI:1339970]
Spred3	ENSMUSG00000037239	0.646433	1.05522e-05	sprouty-related EVH1 domain containing 3 [Source:MGI Symbol;Acc:MGI:2142186]
Hdac2	ENSMUSG00000019777	0.323348	1.07086e-05	histone deacetylase 2 [Source:MGI Symbol;Acc:MGI:1097691]
Arsa	ENSMUSG00000022620	-0.315684	1.07874e-05	arylsulfatase A [Source:MGI Symbol;Acc:MGI:88077]
Ptgir	ENSMUSG00000043017	-1.26108	1.08343e-05	prostaglandin I receptor (IP) [Source:MGI Symbol;Acc:MGI:99535]
Antxr1	ENSMUSG00000033420	0.37643	1.09076e-05	anthrax toxin receptor 1 [Source:MGI Symbol;Acc:MGI:1916788]
Dtna	ENSMUSG00000024302	-1.12097	1.10301e-05	dystrobrevin alpha [Source:MGI Symbol;Acc:MGI:106039]
Mocs2	ENSMUSG00000015536	0.419519	1.10928e-05	molybdenum cofactor synthesis 2 [Source:MGI Symbol;Acc:MGI:1336894]
Casp12	ENSMUSG00000025887	-0.578197	1.10928e-05	caspase 12 [Source:MGI Symbol;Acc:MGI:1312922]
Gtf2ird1	ENSMUSG00000023079	0.534587	1.1392e-05	general transcription factor II I repeat domain-containing 1 [Source:MGI Symbol;Acc:MGI:1861942]
Zfp618	ENSMUSG00000028358	-0.58509	1.1392e-05	zinc finger protein 618 [Source:MGI Symbol;Acc:MGI:1919950]
Dvl1	ENSMUSG00000029071	0.393722	1.1392e-05	dishevelled segment polarity protein 1 [Source:MGI Symbol;Acc:MGI:94941]
Ppp1r12b	ENSMUSG00000073557	-0.857156	1.14369e-05	protein phosphatase 1, regulatory subunit 12B [Source:MGI Symbol;Acc:MGI:1916417]
Nrtn	ENSMUSG00000039481	-3.04704	1.14541e-05	neurturin [Source:MGI Symbol;Acc:MGI:108417]	Yes
Slfn5	ENSMUSG00000054404	-1.03932	1.15091e-05	schlafen 5 [Source:MGI Symbol;Acc:MGI:1329004]
Bud31	ENSMUSG00000038722	0.508464	1.1556e-05	BUD31 homolog [Source:MGI Symbol;Acc:MGI:2141291]
Col8a1	ENSMUSG00000068196	-1.7464	1.16238e-05	collagen, type VIII, alpha 1 [Source:MGI Symbol;Acc:MGI:88463]	Yes
Uso1	ENSMUSG00000029407	0.401462	1.16508e-05	USO1 vesicle docking factor [Source:MGI Symbol;Acc:MGI:1929095]
Psma2	ENSMUSG00000015671	0.35142	1.173e-05	proteasome subunit alpha 2 [Source:MGI Symbol;Acc:MGI:104885]
S1pr3	ENSMUSG00000067586	-0.543609	1.173e-05	sphingosine-1-phosphate receptor 3 [Source:MGI Symbol;Acc:MGI:1339365]
Gmds	ENSMUSG00000038372	-0.530499	1.18849e-05	GDP-mannose 4, 6-dehydratase [Source:MGI Symbol;Acc:MGI:1891112]
Chrdl1	ENSMUSG00000031283	-1.67557	1.19466e-05	chordin-like 1 [Source:MGI Symbol;Acc:MGI:1933172]	Yes
Ddit4l	ENSMUSG00000046818	-0.808859	1.19625e-05	DNA-damage-inducible transcript 4-like [Source:MGI Symbol;Acc:MGI:1920534]
Galm	ENSMUSG00000035473	-0.882188	1.20752e-05	galactose mutarotase [Source:MGI Symbol;Acc:MGI:2442420]
Mapre2	ENSMUSG00000024277	-0.531028	1.20842e-05	microtubule-associated protein, RP/EB family, member 2 [Source:MGI Symbol;Acc:MGI:106271]
Eno1	ENSMUSG00000063524	0.384088	1.20842e-05	enolase 1, alpha non-neuron [Source:MGI Symbol;Acc:MGI:95393]
Ccdc25	ENSMUSG00000022035	0.47462	1.21506e-05	coiled-coil domain containing 25 [Source:MGI Symbol;Acc:MGI:1914429]
Crat	ENSMUSG00000026853	-0.402985	1.23698e-05	carnitine acetyltransferase [Source:MGI Symbol;Acc:MGI:109501]
Tmem184a	ENSMUSG00000036687	-2.79275	1.24237e-05	transmembrane protein 184a [Source:MGI Symbol;Acc:MGI:2385897]	Yes
Golt1b	ENSMUSG00000030245	0.451545	1.24582e-05	golgi transport 1B [Source:MGI Symbol;Acc:MGI:1914214]
Rpia	ENSMUSG00000053604	-0.646828	1.24582e-05	ribose 5-phosphate isomerase A [Source:MGI Symbol;Acc:MGI:103254]
Gstm2-ps1	ENSMUSG00000107369	-0.917607	1.2518e-05	glutathione S-transferase mu 2 (muscle), pseudogene 1 [Source:MGI Symbol;Acc:MGI:3648223]
Peg13	ENSMUSG00000106847	-0.493585	1.25689e-05	paternally expressed 13 [Source:MGI Symbol;Acc:MGI:2663476]
Selenof	ENSMUSG00000037072	0.33478	1.25712e-05	selenoprotein F [Source:MGI Symbol;Acc:MGI:1927947]
Rcc1	ENSMUSG00000028896	0.523438	1.26363e-05	regulator of chromosome condensation 1 [Source:MGI Symbol;Acc:MGI:1913989]
Ulk3	ENSMUSG00000032308	-0.661482	1.2696e-05	unc-51-like kinase 3 [Source:MGI Symbol;Acc:MGI:1918992]
Cnnm3	ENSMUSG00000001138	-0.518693	1.27041e-05	cyclin M3 [Source:MGI Symbol;Acc:MGI:2151055]
Ssh3	ENSMUSG00000034616	-0.44973	1.27233e-05	slingshot protein phosphatase 3 [Source:MGI Symbol;Acc:MGI:2683546]
Abcf2	ENSMUSG00000028953	0.353451	1.27566e-05	ATP-binding cassette, sub-family F (GCN20), member 2 [Source:MGI Symbol;Acc:MGI:1351657]
Eml1	ENSMUSG00000058070	-0.624541	1.27566e-05	echinoderm microtubule associated protein like 1 [Source:MGI Symbol;Acc:MGI:1915769]
Pals1	ENSMUSG00000021112	0.42735	1.2778e-05	protein associated with LIN7 1, MAGUK family member [Source:MGI Symbol;Acc:MGI:1927339]
Tenm4	ENSMUSG00000048078	-0.678456	1.2778e-05	teneurin transmembrane protein 4 [Source:MGI Symbol;Acc:MGI:2447063]
Lamb3	ENSMUSG00000026639	-3.85723	1.29743e-05	laminin, beta 3 [Source:MGI Symbol;Acc:MGI:99915]	Yes
Fmn1	ENSMUSG00000044042	-0.402735	1.29912e-05	formin 1 [Source:MGI Symbol;Acc:MGI:101815]
Hs3st3b1	ENSMUSG00000070407	-1.28309	1.30342e-05	heparan sulfate (glucosamine) 3-O-sulfotransferase 3B1 [Source:MGI Symbol;Acc:MGI:1333853]
Gpam	ENSMUSG00000024978	0.57619	1.30652e-05	glycerol-3-phosphate acyltransferase, mitochondrial [Source:MGI Symbol;Acc:MGI:109162]
Ifi207	ENSMUSG00000073490	-0.996858	1.30652e-05	interferon activated gene 207 [Source:MGI Symbol;Acc:MGI:2138302]
Gm43719	ENSMUSG00000105366	1.41484	1.30941e-05	predicted gene 43719 [Source:MGI Symbol;Acc:MGI:5663856]
Cep170	ENSMUSG00000057335	0.425354	1.3103e-05	centrosomal protein 170 [Source:MGI Symbol;Acc:MGI:1918348]
Snrpb	ENSMUSG00000027404	0.338069	1.35027e-05	small nuclear ribonucleoprotein B [Source:MGI Symbol;Acc:MGI:98342]
Pank3	ENSMUSG00000018846	0.399446	1.35283e-05	pantothenate kinase 3 [Source:MGI Symbol;Acc:MGI:2387464]
Ccdc34	ENSMUSG00000027160	-0.599127	1.35495e-05	coiled-coil domain containing 34 [Source:MGI Symbol;Acc:MGI:1915451]
Pgm5	ENSMUSG00000041731	-2.03434	1.36795e-05	phosphoglucomutase 5 [Source:MGI Symbol;Acc:MGI:1925668]	Yes
Nupr1	ENSMUSG00000030717	0.554647	1.37228e-05	nuclear protein transcription regulator 1 [Source:MGI Symbol;Acc:MGI:1891834]
Tbccd1	ENSMUSG00000004462	-0.516838	1.37715e-05	TBCC domain containing 1 [Source:MGI Symbol;Acc:MGI:1917823]
Cox7a2l	ENSMUSG00000024248	-0.410894	1.39479e-05	cytochrome c oxidase subunit 7A2 like [Source:MGI Symbol;Acc:MGI:106015]
Ttc12	ENSMUSG00000040219	-0.622793	1.39689e-05	tetratricopeptide repeat domain 12 [Source:MGI Symbol;Acc:MGI:2444588]
Myo9a	ENSMUSG00000039585	-0.405876	1.39834e-05	myosin IXa [Source:MGI Symbol;Acc:MGI:107735]
Extl3	ENSMUSG00000021978	0.412314	1.40672e-05	exostosin-like glycosyltransferase 3 [Source:MGI Symbol;Acc:MGI:1860765]
Ormdl3	ENSMUSG00000038150	0.340967	1.41969e-05	ORM1-like 3 (S. cerevisiae) [Source:MGI Symbol;Acc:MGI:1913862]
Clptm1	ENSMUSG00000002981	0.397758	1.42894e-05	cleft lip and palate associated transmembrane protein 1 [Source:MGI Symbol;Acc:MGI:1927155]
Acaa1b	ENSMUSG00000010651	-0.971272	1.42894e-05	acetyl-Coenzyme A acyltransferase 1B [Source:MGI Symbol;Acc:MGI:3605455]
Sh3pxd2b	ENSMUSG00000040711	0.602733	1.44723e-05	SH3 and PX domains 2B [Source:MGI Symbol;Acc:MGI:2442062]
Wfikkn2	ENSMUSG00000044177	-2.03898	1.45183e-05	WAP, follistatin/kazal, immunoglobulin, kunitz and netrin domain containing 2 [Source:MGI Symbol;Acc:MGI:2669209]	Yes
Gm16576	ENSMUSG00000087543	-2.21084	1.45238e-05	predicted gene 16576 [Source:MGI Symbol;Acc:MGI:4414996]	Yes
Bpnt1	ENSMUSG00000026617	0.57485	1.45438e-05	3'(2'), 5'-bisphosphate nucleotidase 1 [Source:MGI Symbol;Acc:MGI:1338800]
Srsf5	ENSMUSG00000021134	-0.45981	1.45924e-05	serine and arginine-rich splicing factor 5 [Source:MGI Symbol;Acc:MGI:98287]
Gosr2	ENSMUSG00000020946	0.371778	1.46106e-05	golgi SNAP receptor complex member 2 [Source:MGI Symbol;Acc:MGI:1927204]
Uaca	ENSMUSG00000034485	-0.860934	1.4654e-05	uveal autoantigen with coiled-coil domains and ankyrin repeats [Source:MGI Symbol;Acc:MGI:1919815]
Decr2	ENSMUSG00000036775	-0.473635	1.4654e-05	2-4-dienoyl-Coenzyme A reductase 2, peroxisomal [Source:MGI Symbol;Acc:MGI:1347059]
Car2	ENSMUSG00000027562	2.41707	1.48175e-05	carbonic anhydrase 2 [Source:MGI Symbol;Acc:MGI:88269]	Yes
2610008E11Rik	ENSMUSG00000060301	-0.373869	1.48467e-05	RIKEN cDNA 2610008E11 gene [Source:MGI Symbol;Acc:MGI:1919378]
Snx32	ENSMUSG00000056185	-0.514184	1.4873e-05	sorting nexin 32 [Source:MGI Symbol;Acc:MGI:2444704]
Il33	ENSMUSG00000024810	0.666277	1.49177e-05	interleukin 33 [Source:MGI Symbol;Acc:MGI:1924375]
Adi1	ENSMUSG00000020629	-0.390448	1.49642e-05	acireductone dioxygenase 1 [Source:MGI Symbol;Acc:MGI:2144929]
Gpr39	ENSMUSG00000026343	-1.17985	1.49642e-05	G protein-coupled receptor 39 [Source:MGI Symbol;Acc:MGI:1918361]
Phkg1	ENSMUSG00000025537	-1.79615	1.50099e-05	phosphorylase kinase gamma 1 [Source:MGI Symbol;Acc:MGI:97579]	Yes
Mthfd2	ENSMUSG00000005667	0.533821	1.50486e-05	methylenetetrahydrofolate dehydrogenase (NAD+ dependent), methenyltetrahydrofolate cyclohydrolase [Source:MGI Symbol;Acc:MGI:1338850]
Crocc	ENSMUSG00000040860	-0.698937	1.51603e-05	ciliary rootlet coiled-coil, rootletin [Source:MGI Symbol;Acc:MGI:3529431]
Tinf2	ENSMUSG00000007589	0.615394	1.5539e-05	Terf1 (TRF1)-interacting nuclear factor 2 [Source:MGI Symbol;Acc:MGI:107246]
Ghitm	ENSMUSG00000041028	0.314166	1.55582e-05	growth hormone inducible transmembrane protein [Source:MGI Symbol;Acc:MGI:1913342]
Atp5pb	ENSMUSG00000000563	0.289647	1.56753e-05	ATP synthase peripheral stalk-membrane subunit b [Source:MGI Symbol;Acc:MGI:1100495]
4833439L19Rik	ENSMUSG00000025871	0.417143	1.56991e-05	RIKEN cDNA 4833439L19 gene [Source:MGI Symbol;Acc:MGI:1921162]
Sh3bgrl3	ENSMUSG00000028843	-0.526215	1.57095e-05	SH3 domain binding glutamic acid-rich protein-like 3 [Source:MGI Symbol;Acc:MGI:1920973]
Hsd11b1	ENSMUSG00000016194	1.16751	1.58209e-05	hydroxysteroid 11-beta dehydrogenase 1 [Source:MGI Symbol;Acc:MGI:103562]
Leo1	ENSMUSG00000042487	0.431501	1.58268e-05	Leo1, Paf1/RNA polymerase II complex component [Source:MGI Symbol;Acc:MGI:2685031]
Nsmf	ENSMUSG00000006476	-0.445676	1.58913e-05	NMDA receptor synaptonuclear signaling and neuronal migration factor [Source:MGI Symbol;Acc:MGI:1861755]
Tbx3	ENSMUSG00000018604	0.63447	1.59339e-05	T-box 3 [Source:MGI Symbol;Acc:MGI:98495]
Neo1	ENSMUSG00000032340	0.468524	1.59514e-05	neogenin [Source:MGI Symbol;Acc:MGI:1097159]
Mydgf	ENSMUSG00000019579	0.401388	1.59673e-05	myeloid derived growth factor [Source:MGI Symbol;Acc:MGI:2156020]
Uvrag	ENSMUSG00000035354	0.437068	1.59673e-05	UV radiation resistance associated gene [Source:MGI Symbol;Acc:MGI:1925860]
Aars	ENSMUSG00000031960	0.527744	1.59904e-05	alanyl-tRNA synthetase [Source:MGI Symbol;Acc:MGI:2384560]
Cspg4	ENSMUSG00000032911	-2.0565	1.61486e-05	chondroitin sulfate proteoglycan 4 [Source:MGI Symbol;Acc:MGI:2153093]	Yes
Adrm1	ENSMUSG00000039041	0.35376	1.631e-05	adhesion regulating molecule 1 [Source:MGI Symbol;Acc:MGI:1929289]
Eif2s2	ENSMUSG00000074656	0.379249	1.64474e-05	eukaryotic translation initiation factor 2, subunit 2 (beta) [Source:MGI Symbol;Acc:MGI:1914454]
Saraf	ENSMUSG00000031532	0.351417	1.64836e-05	store-operated calcium entry-associated regulatory factor [Source:MGI Symbol;Acc:MGI:1915137]
Mras	ENSMUSG00000032470	0.400587	1.65945e-05	muscle and microspikes RAS [Source:MGI Symbol;Acc:MGI:1100856]
Fign	ENSMUSG00000075324	-0.882326	1.66616e-05	fidgetin [Source:MGI Symbol;Acc:MGI:1890647]
Bmp6	ENSMUSG00000039004	-1.50479	1.67787e-05	bone morphogenetic protein 6 [Source:MGI Symbol;Acc:MGI:88182]	Yes
Eif4g1	ENSMUSG00000045983	0.360172	1.67787e-05	eukaryotic translation initiation factor 4, gamma 1 [Source:MGI Symbol;Acc:MGI:2384784]
Polr3d	ENSMUSG00000000776	0.485442	1.67857e-05	polymerase (RNA) III (DNA directed) polypeptide D [Source:MGI Symbol;Acc:MGI:1914315]
Vps13b	ENSMUSG00000037646	-0.463018	1.69186e-05	vacuolar protein sorting 13B [Source:MGI Symbol;Acc:MGI:1916380]
Baz1a	ENSMUSG00000035021	0.565952	1.70624e-05	bromodomain adjacent to zinc finger domain 1A [Source:MGI Symbol;Acc:MGI:1309478]
Ccn3	ENSMUSG00000037362	-0.75197	1.71058e-05	cellular communication network factor 3 [Source:MGI Symbol;Acc:MGI:109185]
Elovl6	ENSMUSG00000041220	0.494921	1.7142e-05	ELOVL family member 6, elongation of long chain fatty acids (yeast) [Source:MGI Symbol;Acc:MGI:2156528]
Myzap	ENSMUSG00000041361	-1.53184	1.72643e-05	myocardial zonula adherens protein [Source:MGI Symbol;Acc:MGI:2142908]	Yes
Clmn	ENSMUSG00000021097	-0.807755	1.73932e-05	calmin [Source:MGI Symbol;Acc:MGI:2136957]
Ccnd3	ENSMUSG00000034165	0.372389	1.75923e-05	cyclin D3 [Source:MGI Symbol;Acc:MGI:88315]
Tnrc6c	ENSMUSG00000025571	-0.458555	1.76575e-05	trinucleotide repeat containing 6C [Source:MGI Symbol;Acc:MGI:2443265]
Lrrc8c	ENSMUSG00000054720	-0.795495	1.78034e-05	leucine rich repeat containing 8 family, member C [Source:MGI Symbol;Acc:MGI:2140839]
Ube3c	ENSMUSG00000039000	0.424848	1.79295e-05	ubiquitin protein ligase E3C [Source:MGI Symbol;Acc:MGI:2140998]
Shc4	ENSMUSG00000035109	-0.773323	1.81235e-05	SHC (Src homology 2 domain containing) family, member 4 [Source:MGI Symbol;Acc:MGI:2655364]
Kdelr2	ENSMUSG00000079111	0.466042	1.81785e-05	KDEL (Lys-Asp-Glu-Leu) endoplasmic reticulum protein retention receptor 2 [Source:MGI Symbol;Acc:MGI:1914163]
Ilk	ENSMUSG00000030890	0.370757	1.81919e-05	integrin linked kinase [Source:MGI Symbol;Acc:MGI:1195267]
Cda	ENSMUSG00000028755	0.722123	1.83028e-05	cytidine deaminase [Source:MGI Symbol;Acc:MGI:1919519]
Igfbp7	ENSMUSG00000036256	-0.513956	1.84328e-05	insulin-like growth factor binding protein 7 [Source:MGI Symbol;Acc:MGI:1352480]
[truncated: 3,858 more rows]

## Sheet: Table S4
Table S4: List of genes with significant changes in FD lesion-derived human BMSCs versus healthy donor BMSCs, padj<0.05
gene_name	ensembl_gene_id	log2FoldChange	padj	description	Enrichr analysis (padj<0.01, log2Fold change ±1.5)
MAB21L1	ENSG00000180660	5.75934	4.18313e-42	mab-21 like 1 [Source:HGNC Symbol;Acc:HGNC:6757]	Yes
PDE4D	ENSG00000113448	2.2682	1.51975e-28	phosphodiesterase 4D [Source:HGNC Symbol;Acc:HGNC:8783]	Yes
RRAGD	ENSG00000025039	4.27218	9.63901e-27	Ras related GTP binding D [Source:HGNC Symbol;Acc:HGNC:19903]	Yes
SEC14L2	ENSG00000100003	-1.70501	1.15264e-25	SEC14 like lipid binding 2 [Source:HGNC Symbol;Acc:HGNC:10699]	Yes
TRHDE	ENSG00000072657	-7.20285	6.93425e-25	thyrotropin releasing hormone degrading enzyme [Source:HGNC Symbol;Acc:HGNC:30748]	Yes
CLSTN2	ENSG00000158258	-3.90613	2.08537e-23	calsyntenin 2 [Source:HGNC Symbol;Acc:HGNC:17448]	Yes
SAMD5	ENSG00000203727	5.75232	2.41391e-22	sterile alpha motif domain containing 5 [Source:HGNC Symbol;Acc:HGNC:21180]	Yes
HTR2A	ENSG00000102468	5.5237	2.08767e-21	5-hydroxytryptamine receptor 2A [Source:HGNC Symbol;Acc:HGNC:5293]	Yes
UNC5D	ENSG00000156687	9.54261	3.62169e-21	unc-5 netrin receptor D [Source:HGNC Symbol;Acc:HGNC:18634]	Yes
CLDN11	ENSG00000013297	-4.71121	8.47522e-21	claudin 11 [Source:HGNC Symbol;Acc:HGNC:8514]	Yes
KCNQ5	ENSG00000185760	-1.92113	1.74624e-20	potassium voltage-gated channel subfamily Q member 5 [Source:HGNC Symbol;Acc:HGNC:6299]	Yes
SPON1	ENSG00000262655	7.27689	4.06243e-20	spondin 1 [Source:HGNC Symbol;Acc:HGNC:11252]	Yes
ANO5	ENSG00000171714	5.76144	2.65162e-19	anoctamin 5 [Source:HGNC Symbol;Acc:HGNC:27337]	Yes
PDE4B	ENSG00000184588	4.33571	2.65162e-19	phosphodiesterase 4B [Source:HGNC Symbol;Acc:HGNC:8781]	Yes
KYNU	ENSG00000115919	6.75861	3.97645e-18	kynureninase [Source:HGNC Symbol;Acc:HGNC:6469]	Yes
CCN3	ENSG00000136999	3.879	1.93457e-17	cellular communication network factor 3 [Source:HGNC Symbol;Acc:HGNC:7885]	Yes
PRKG1	ENSG00000185532	2.58996	1.93457e-17	protein kinase cGMP-dependent 1 [Source:HGNC Symbol;Acc:HGNC:9414]	Yes
MAB21L2	ENSG00000181541	6.54383	7.15531e-17	mab-21 like 2 [Source:HGNC Symbol;Acc:HGNC:6758]	Yes
DSG2	ENSG00000046604	5.45548	1.97848e-16	desmoglein 2 [Source:HGNC Symbol;Acc:HGNC:3049]	Yes
RSPO3	ENSG00000146374	5.06401	4.59616e-16	R-spondin 3 [Source:HGNC Symbol;Acc:HGNC:20866]	Yes
MAOA	ENSG00000189221	3.1012	4.72114e-16	monoamine oxidase A [Source:HGNC Symbol;Acc:HGNC:6833]	Yes
RAB23	ENSG00000112210	1.63781	4.86799e-16	RAB23, member RAS oncogene family [Source:HGNC Symbol;Acc:HGNC:14263]	Yes
CACNA2D3	ENSG00000157445	5.09262	1.4167e-15	calcium voltage-gated channel auxiliary subunit alpha2delta 3 [Source:HGNC Symbol;Acc:HGNC:15460]	Yes
ENSG00000260822	ENSG00000260822	1.85336	1.47155e-15	NA	Yes
KLHL13	ENSG00000003096	3.26994	1.5399e-15	kelch like family member 13 [Source:HGNC Symbol;Acc:HGNC:22931]	Yes
GPM6B	ENSG00000046653	4.64389	1.56752e-15	glycoprotein M6B [Source:HGNC Symbol;Acc:HGNC:4461]	Yes
CELF2	ENSG00000048740	3.45657	3.51055e-15	CUGBP Elav-like family member 2 [Source:HGNC Symbol;Acc:HGNC:2550]	Yes
PIM1	ENSG00000137193	-2.46421	3.94463e-15	Pim-1 proto-oncogene, serine/threonine kinase [Source:HGNC Symbol;Acc:HGNC:8986]	Yes
EPHA5	ENSG00000145242	5.6553	3.94463e-15	EPH receptor A5 [Source:HGNC Symbol;Acc:HGNC:3389]	Yes
ST6GALNAC2	ENSG00000070731	2.98314	5.17179e-15	ST6 N-acetylgalactosaminide alpha-2,6-sialyltransferase 2 [Source:HGNC Symbol;Acc:HGNC:10867]	Yes
LINC00968	ENSG00000246430	2.31051	1.40119e-14	long intergenic non-protein coding RNA 968 [Source:HGNC Symbol;Acc:HGNC:48727]	Yes
TRHDE-AS1	ENSG00000236333	-6.9449	1.85462e-14	TRHDE antisense RNA 1 [Source:HGNC Symbol;Acc:HGNC:27471]	Yes
FCMR	ENSG00000162894	5.02664	3.48468e-14	Fc fragment of IgM receptor [Source:HGNC Symbol;Acc:HGNC:14315]	Yes
RAB27B	ENSG00000041353	2.46774	4.1133e-14	RAB27B, member RAS oncogene family [Source:HGNC Symbol;Acc:HGNC:9767]	Yes
PARP15	ENSG00000173200	3.03178	4.1133e-14	poly(ADP-ribose) polymerase family member 15 [Source:HGNC Symbol;Acc:HGNC:26876]	Yes
CNTNAP3P2	ENSG00000276386	-4.28226	4.31535e-14	CNTNAP3 pseudogene 2 [Source:HGNC Symbol;Acc:HGNC:49589]	Yes
WFDC1	ENSG00000103175	5.92324	6.96376e-14	WAP four-disulfide core domain 1 [Source:HGNC Symbol;Acc:HGNC:15466]	Yes
SCG2	ENSG00000171951	4.16626	7.53706e-14	secretogranin II [Source:HGNC Symbol;Acc:HGNC:10575]	Yes
TEC	ENSG00000135605	2.47191	1.1858e-13	tec protein tyrosine kinase [Source:HGNC Symbol;Acc:HGNC:11719]	Yes
PIEZO2	ENSG00000154864	4.54622	1.26203e-13	piezo type mechanosensitive ion channel component 2 [Source:HGNC Symbol;Acc:HGNC:26270]	Yes
SCARA5	ENSG00000168079	8.69425	1.26203e-13	scavenger receptor class A member 5 [Source:HGNC Symbol;Acc:HGNC:28701]	Yes
PRUNE2	ENSG00000106772	3.26091	1.84003e-13	prune homolog 2 with BCH domain [Source:HGNC Symbol;Acc:HGNC:25209]	Yes
TMEM30B	ENSG00000182107	3.60308	2.41199e-13	transmembrane protein 30B [Source:HGNC Symbol;Acc:HGNC:27254]	Yes
FOLR3	ENSG00000110203	4.27663	3.13083e-13	folate receptor gamma [Source:HGNC Symbol;Acc:HGNC:3795]	Yes
CYYR1	ENSG00000166265	5.44818	3.4953e-13	cysteine and tyrosine rich 1 [Source:HGNC Symbol;Acc:HGNC:16274]	Yes
LAYN	ENSG00000204381	2.63811	4.20542e-13	layilin [Source:HGNC Symbol;Acc:HGNC:29471]	Yes
ABCB4	ENSG00000005471	5.67333	9.99307e-13	ATP binding cassette subfamily B member 4 [Source:HGNC Symbol;Acc:HGNC:45]	Yes
ENPP2	ENSG00000136960	4.1336	1.11316e-12	ectonucleotide pyrophosphatase/phosphodiesterase 2 [Source:HGNC Symbol;Acc:HGNC:3357]	Yes
SCIN	ENSG00000006747	4.30806	1.35256e-12	scinderin [Source:HGNC Symbol;Acc:HGNC:21695]	Yes
PPARGC1A	ENSG00000109819	5.16393	1.68217e-12	PPARG coactivator 1 alpha [Source:HGNC Symbol;Acc:HGNC:9237]	Yes
FLRT3	ENSG00000125848	2.09923	2.02002e-12	fibronectin leucine rich transmembrane protein 3 [Source:HGNC Symbol;Acc:HGNC:3762]	Yes
GPD2	ENSG00000115159	1.05884	2.5147e-12	glycerol-3-phosphate dehydrogenase 2 [Source:HGNC Symbol;Acc:HGNC:4456]
LINC01139	ENSG00000215808	2.09966	3.62088e-12	long intergenic non-protein coding RNA 1139 [Source:HGNC Symbol;Acc:HGNC:27924]	Yes
ENSG00000258425	ENSG00000258425	-2.5946	3.82721e-12	novel transcript, antisense to LTBP2	Yes
CORIN	ENSG00000145244	7.11783	7.51214e-12	corin, serine peptidase [Source:HGNC Symbol;Acc:HGNC:19012]	Yes
STRA6	ENSG00000137868	-6.16705	7.97162e-12	signaling receptor and transporter of retinol STRA6 [Source:HGNC Symbol;Acc:HGNC:30650]	Yes
CNTNAP3	ENSG00000106714	-4.22699	8.05497e-12	contactin associated protein family member 3 [Source:HGNC Symbol;Acc:HGNC:13834]	Yes
ENPP5	ENSG00000112796	3.35344	8.05497e-12	ectonucleotide pyrophosphatase/phosphodiesterase family member 5 [Source:HGNC Symbol;Acc:HGNC:13717]	Yes
S100A4	ENSG00000196154	5.5015	1.07851e-11	S100 calcium binding protein A4 [Source:HGNC Symbol;Acc:HGNC:10494]	Yes
ELFN2	ENSG00000166897	-4.16898	1.12233e-11	extracellular leucine rich repeat and fibronectin type III domain containing 2 [Source:HGNC Symbol;Acc:HGNC:29396]	Yes
FAM87A	ENSG00000182366	3.32688	1.17513e-11	family with sequence similarity 87 member A [Source:HGNC Symbol;Acc:HGNC:27233]	Yes
GMFG	ENSG00000130755	4.16538	1.62746e-11	glia maturation factor gamma [Source:HGNC Symbol;Acc:HGNC:4374]	Yes
SOCS2	ENSG00000120833	3.42876	2.45646e-11	suppressor of cytokine signaling 2 [Source:HGNC Symbol;Acc:HGNC:19382]	Yes
ZEB2	ENSG00000169554	1.23243	2.45646e-11	zinc finger E-box binding homeobox 2 [Source:HGNC Symbol;Acc:HGNC:14881]
TLE1	ENSG00000196781	-1.45474	2.45646e-11	TLE family member 1, transcriptional corepressor [Source:HGNC Symbol;Acc:HGNC:11837]
TMEM130	ENSG00000166448	-3.58423	3.07327e-11	transmembrane protein 130 [Source:HGNC Symbol;Acc:HGNC:25429]	Yes
SOCS2-AS1	ENSG00000246985	3.38188	3.70619e-11	SOCS2 antisense RNA 1 [Source:HGNC Symbol;Acc:HGNC:27054]	Yes
HIC1	ENSG00000177374	-2.05247	3.98719e-11	HIC ZBTB transcriptional repressor 1 [Source:HGNC Symbol;Acc:HGNC:4909]	Yes
CHRDL2	ENSG00000054938	5.6703	4.20902e-11	chordin like 2 [Source:HGNC Symbol;Acc:HGNC:24168]	Yes
RARA-AS1	ENSG00000265666	-2.0156	4.5359e-11	RARA antisense RNA 1 [Source:HGNC Symbol;Acc:HGNC:49577]	Yes
LINC00595	ENSG00000230417	2.17538	5.33034e-11	long intergenic non-protein coding RNA 595 [Source:HGNC Symbol;Acc:HGNC:31430]	Yes
LINC02086	ENSG00000244649	-7.15597	5.76135e-11	long intergenic non-protein coding RNA 2086 [Source:HGNC Symbol;Acc:HGNC:52936]	Yes
SEMA3D	ENSG00000153993	5.79854	6.33114e-11	semaphorin 3D [Source:HGNC Symbol;Acc:HGNC:10726]	Yes
LINC00869	ENSG00000277147	1.87021	8.19525e-11	long intergenic non-protein coding RNA 869 [Source:HGNC Symbol;Acc:HGNC:29050]	Yes
LINC00869-1	ENSG00000277147	1.87021	8.19525e-11	long intergenic non-protein coding RNA 869 [Source:HGNC Symbol;Acc:HGNC:29050]	Yes
MITF	ENSG00000187098	1.64531	8.81571e-11	melanocyte inducing transcription factor [Source:HGNC Symbol;Acc:HGNC:7105]	Yes
ATP6V1A	ENSG00000114573	1.19094	9.59482e-11	ATPase H+ transporting V1 subunit A [Source:HGNC Symbol;Acc:HGNC:851]
PPP1R14C	ENSG00000198729	2.7328	1.00872e-10	protein phosphatase 1 regulatory inhibitor subunit 14C [Source:HGNC Symbol;Acc:HGNC:14952]	Yes
FAAH	ENSG00000117480	1.44213	1.6857e-10	fatty acid amide hydrolase [Source:HGNC Symbol;Acc:HGNC:3553]
PLPPR4	ENSG00000117600	5.28604	1.6857e-10	phospholipid phosphatase related 4 [Source:HGNC Symbol;Acc:HGNC:23496]	Yes
VMO1	ENSG00000182853	3.74441	1.71256e-10	vitelline membrane outer layer 1 homolog [Source:HGNC Symbol;Acc:HGNC:30387]	Yes
VCAN-AS1	ENSG00000249835	-2.50937	1.71256e-10	VCAN antisense RNA 1 [Source:HGNC Symbol;Acc:HGNC:40163]	Yes
RNF207	ENSG00000158286	-2.72746	1.84904e-10	ring finger protein 207 [Source:HGNC Symbol;Acc:HGNC:32947]	Yes
ENSG00000223414	ENSG00000223414	5.032	2.12001e-10	NA	Yes
COBL	ENSG00000106078	7.38991	2.27732e-10	cordon-bleu WH2 repeat protein [Source:HGNC Symbol;Acc:HGNC:22199]	Yes
PAX1	ENSG00000125813	7.27276	3.00784e-10	paired box 1 [Source:HGNC Symbol;Acc:HGNC:8615]	Yes
OSCAR	ENSG00000170909	-2.53626	3.53913e-10	osteoclast associated Ig-like receptor [Source:HGNC Symbol;Acc:HGNC:29960]	Yes
SLC20A1	ENSG00000144136	-0.950095	3.79727e-10	solute carrier family 20 member 1 [Source:HGNC Symbol;Acc:HGNC:10946]
CARD9	ENSG00000187796	-2.27584	3.79727e-10	caspase recruitment domain family member 9 [Source:HGNC Symbol;Acc:HGNC:16391]	Yes
CSGALNACT1	ENSG00000147408	2.65604	3.91742e-10	chondroitin sulfate N-acetylgalactosaminyltransferase 1 [Source:HGNC Symbol;Acc:HGNC:24290]	Yes
TMTC1	ENSG00000133687	2.71654	5.71927e-10	transmembrane O-mannosyltransferase targeting cadherins 1 [Source:HGNC Symbol;Acc:HGNC:24099]	Yes
LIMA1	ENSG00000050405	1.17748	6.27203e-10	LIM domain and actin binding 1 [Source:HGNC Symbol;Acc:HGNC:24636]
PTPRD	ENSG00000153707	3.96555	6.79741e-10	protein tyrosine phosphatase receptor type D [Source:HGNC Symbol;Acc:HGNC:9668]	Yes
POU2F2	ENSG00000028277	-2.29915	8.24853e-10	POU class 2 homeobox 2 [Source:HGNC Symbol;Acc:HGNC:9213]	Yes
F3	ENSG00000117525	4.01191	8.64616e-10	coagulation factor III, tissue factor [Source:HGNC Symbol;Acc:HGNC:3541]	Yes
KCNB1	ENSG00000158445	4.01901	8.86709e-10	potassium voltage-gated channel subfamily B member 1 [Source:HGNC Symbol;Acc:HGNC:6231]	Yes
EPHA5-AS1	ENSG00000250846	5.13197	8.86709e-10	EPHA5 antisense RNA 1 [Source:HGNC Symbol;Acc:HGNC:50602]	Yes
VCAN	ENSG00000038427	-1.8031	9.03217e-10	versican [Source:HGNC Symbol;Acc:HGNC:2464]	Yes
CACNG7	ENSG00000105605	-4.70372	9.1706e-10	calcium voltage-gated channel auxiliary subunit gamma 7 [Source:HGNC Symbol;Acc:HGNC:13626]	Yes
RENBP	ENSG00000102032	3.12332	9.42242e-10	renin binding protein [Source:HGNC Symbol;Acc:HGNC:9959]	Yes
EPS8L2	ENSG00000177106	-1.29953	1.02045e-09	EPS8 like 2 [Source:HGNC Symbol;Acc:HGNC:21296]
MAPRE2	ENSG00000166974	0.645498	1.15852e-09	microtubule associated protein RP/EB family member 2 [Source:HGNC Symbol;Acc:HGNC:6891]
ZNF704	ENSG00000164684	2.39179	1.27962e-09	zinc finger protein 704 [Source:HGNC Symbol;Acc:HGNC:32291]	Yes
WNT7B	ENSG00000188064	-4.05585	1.27962e-09	Wnt family member 7B [Source:HGNC Symbol;Acc:HGNC:12787]	Yes
ADGRD1	ENSG00000111452	4.8953	1.28753e-09	adhesion G protein-coupled receptor D1 [Source:HGNC Symbol;Acc:HGNC:19893]	Yes
ASAH1	ENSG00000104763	1.55938	1.37723e-09	N-acylsphingosine amidohydrolase 1 [Source:HGNC Symbol;Acc:HGNC:735]	Yes
ENSG00000279196	ENSG00000279196	-2.23589	1.3894e-09	novel transcript	Yes
AOX1	ENSG00000138356	2.23364	1.76529e-09	aldehyde oxidase 1 [Source:HGNC Symbol;Acc:HGNC:553]	Yes
KIT	ENSG00000157404	4.42269	2.02505e-09	KIT proto-oncogene, receptor tyrosine kinase [Source:HGNC Symbol;Acc:HGNC:6342]	Yes
ICA1	ENSG00000003147	3.38431	2.12808e-09	islet cell autoantigen 1 [Source:HGNC Symbol;Acc:HGNC:5343]	Yes
CPE	ENSG00000109472	3.1936	2.12808e-09	carboxypeptidase E [Source:HGNC Symbol;Acc:HGNC:2303]	Yes
FSD1	ENSG00000105255	-2.0553	3.1051e-09	fibronectin type III and SPRY domain containing 1 [Source:HGNC Symbol;Acc:HGNC:13745]	Yes
PRELP	ENSG00000188783	3.52257	3.31876e-09	proline and arginine rich end leucine rich repeat protein [Source:HGNC Symbol;Acc:HGNC:9357]	Yes
MSX2	ENSG00000120149	4.00467	3.37238e-09	msh homeobox 2 [Source:HGNC Symbol;Acc:HGNC:7392]	Yes
LRRC17	ENSG00000128606	-3.46956	3.49445e-09	leucine rich repeat containing 17 [Source:HGNC Symbol;Acc:HGNC:16895]	Yes
PRL	ENSG00000172179	6.28329	4.6084e-09	prolactin [Source:HGNC Symbol;Acc:HGNC:9445]	Yes
PEG10	ENSG00000242265	2.83905	5.02879e-09	paternally expressed 10 [Source:HGNC Symbol;Acc:HGNC:14005]	Yes
RAPGEF3	ENSG00000079337	-1.66117	5.04434e-09	Rap guanine nucleotide exchange factor 3 [Source:HGNC Symbol;Acc:HGNC:16629]	Yes
CERCAM	ENSG00000167123	-1.03335	7.2704e-09	cerebral endothelial cell adhesion molecule [Source:HGNC Symbol;Acc:HGNC:23723]
HOXB9	ENSG00000170689	-5.7042	7.2704e-09	homeobox B9 [Source:HGNC Symbol;Acc:HGNC:5120]	Yes
PPFIBP2	ENSG00000166387	2.01296	7.68696e-09	PPFIA binding protein 2 [Source:HGNC Symbol;Acc:HGNC:9250]	Yes
HOXA-AS2	ENSG00000253552	-4.08725	7.99294e-09	HOXA cluster antisense RNA 2 [Source:HGNC Symbol;Acc:HGNC:43745]	Yes
SLC47A1	ENSG00000142494	3.75494	8.67883e-09	solute carrier family 47 member 1 [Source:HGNC Symbol;Acc:HGNC:25588]	Yes
TENM4	ENSG00000149256	-2.4681	8.67883e-09	teneurin transmembrane protein 4 [Source:HGNC Symbol;Acc:HGNC:29945]	Yes
NTRK2	ENSG00000148053	4.65164	9.99839e-09	neurotrophic receptor tyrosine kinase 2 [Source:HGNC Symbol;Acc:HGNC:8032]	Yes
FST	ENSG00000134363	1.46268	1.11262e-08	follistatin [Source:HGNC Symbol;Acc:HGNC:3971]
SLC38A4	ENSG00000139209	2.66801	1.58397e-08	solute carrier family 38 member 4 [Source:HGNC Symbol;Acc:HGNC:14679]	Yes
TBX5-AS1	ENSG00000255399	4.67277	1.58397e-08	TBX5 antisense RNA 1 [Source:HGNC Symbol;Acc:HGNC:27402]	Yes
ADCY7	ENSG00000121281	-1.43592	1.70861e-08	adenylate cyclase 7 [Source:HGNC Symbol;Acc:HGNC:238]
MYO1D	ENSG00000176658	2.19443	1.70861e-08	myosin ID [Source:HGNC Symbol;Acc:HGNC:7598]	Yes
STAT4	ENSG00000138378	2.5724	1.76122e-08	signal transducer and activator of transcription 4 [Source:HGNC Symbol;Acc:HGNC:11365]	Yes
MCF2L	ENSG00000126217	7.24514	1.85867e-08	MCF.2 cell line derived transforming sequence like [Source:HGNC Symbol;Acc:HGNC:14576]	Yes
VPS41	ENSG00000006715	0.552215	1.95418e-08	VPS41 subunit of HOPS complex [Source:HGNC Symbol;Acc:HGNC:12713]
FZD3	ENSG00000104290	1.80661	1.95418e-08	frizzled class receptor 3 [Source:HGNC Symbol;Acc:HGNC:4041]	Yes
C11orf87	ENSG00000185742	2.5053	1.96585e-08	chromosome 11 open reading frame 87 [Source:HGNC Symbol;Acc:HGNC:33788]	Yes
ELMO1	ENSG00000155849	5.15344	2.03981e-08	engulfment and cell motility 1 [Source:HGNC Symbol;Acc:HGNC:16286]	Yes
HHIP-AS1	ENSG00000248890	-2.41387	2.12312e-08	HHIP antisense RNA 1 [Source:HGNC Symbol;Acc:HGNC:44182]	Yes
PROS1	ENSG00000184500	1.91215	2.31899e-08	protein S [Source:HGNC Symbol;Acc:HGNC:9456]	Yes
INTS6L	ENSG00000165359	-0.980404	2.37815e-08	integrator complex subunit 6 like [Source:HGNC Symbol;Acc:HGNC:27334]
PCDH7	ENSG00000169851	3.72598	2.87828e-08	protocadherin 7 [Source:HGNC Symbol;Acc:HGNC:8659]	Yes
HUNK	ENSG00000142149	6.66913	2.89904e-08	hormonally up-regulated Neu-associated kinase [Source:HGNC Symbol;Acc:HGNC:13326]	Yes
ITK	ENSG00000113263	3.81942	2.98857e-08	IL2 inducible T cell kinase [Source:HGNC Symbol;Acc:HGNC:6171]	Yes
SERINC1	ENSG00000111897	0.928597	3.2472e-08	serine incorporator 1 [Source:HGNC Symbol;Acc:HGNC:13464]
STOM	ENSG00000148175	1.39596	3.2472e-08	stomatin [Source:HGNC Symbol;Acc:HGNC:3383]
VAT1L	ENSG00000171724	-4.73896	3.81699e-08	vesicle amine transport 1 like [Source:HGNC Symbol;Acc:HGNC:29315]	Yes
POLR1F	ENSG00000105849	1.14552	3.8491e-08	RNA polymerase I subunit F [Source:HGNC Symbol;Acc:HGNC:18027]
STMN2	ENSG00000104435	11.9856	3.87251e-08	stathmin 2 [Source:HGNC Symbol;Acc:HGNC:10577]	Yes
CPA3	ENSG00000163751	2.25747	4.06385e-08	carboxypeptidase A3 [Source:HGNC Symbol;Acc:HGNC:2298]	Yes
ENPP4	ENSG00000001561	2.46251	4.13385e-08	ectonucleotide pyrophosphatase/phosphodiesterase 4 [Source:HGNC Symbol;Acc:HGNC:3359]	Yes
THSD7A	ENSG00000005108	2.70231	4.56985e-08	thrombospondin type 1 domain containing 7A [Source:HGNC Symbol;Acc:HGNC:22207]	Yes
LAMP5	ENSG00000125869	4.9091	5.17855e-08	lysosomal associated membrane protein family member 5 [Source:HGNC Symbol;Acc:HGNC:16097]	Yes
MKX	ENSG00000150051	2.81797	5.73272e-08	mohawk homeobox [Source:HGNC Symbol;Acc:HGNC:23729]	Yes
CRYAB	ENSG00000109846	2.80454	6.73294e-08	crystallin alpha B [Source:HGNC Symbol;Acc:HGNC:2389]	Yes
PABPC1P4	ENSG00000255642	-1.05368	6.78626e-08	poly(A) binding protein cytoplasmic 1 pseudogene 4 [Source:HGNC Symbol;Acc:HGNC:8563]
PDPN	ENSG00000162493	4.47618	6.95769e-08	podoplanin [Source:HGNC Symbol;Acc:HGNC:29602]	Yes
CHPT1	ENSG00000111666	1.02774	7.17323e-08	choline phosphotransferase 1 [Source:HGNC Symbol;Acc:HGNC:17852]
SLC2A5	ENSG00000142583	-3.3258	7.32108e-08	solute carrier family 2 member 5 [Source:HGNC Symbol;Acc:HGNC:11010]	Yes
ENSG00000269926	ENSG00000269926	-1.93943	7.38865e-08	NA	Yes
STX1A	ENSG00000106089	-1.18501	7.55218e-08	syntaxin 1A [Source:HGNC Symbol;Acc:HGNC:11433]
MMUT	ENSG00000146085	0.811073	7.55218e-08	methylmalonyl-CoA mutase [Source:HGNC Symbol;Acc:HGNC:7526]
TM4SF20	ENSG00000168955	5.50113	8.25289e-08	transmembrane 4 L six family member 20 [Source:HGNC Symbol;Acc:HGNC:26230]	Yes
CST2	ENSG00000170369	4.85753	9.44401e-08	cystatin SA [Source:HGNC Symbol;Acc:HGNC:2474]	Yes
CNTNAP3C	ENSG00000283378	-3.31484	1.0169e-07	contactin associated protein family member 3C [Source:HGNC Symbol;Acc:HGNC:53878]	Yes
TRBC2	ENSG00000211772	-6.89834	1.02609e-07	T cell receptor beta constant 2 [Source:HGNC Symbol;Acc:HGNC:12157]	Yes
CKMT2	ENSG00000131730	4.42795	1.05756e-07	creatine kinase, mitochondrial 2 [Source:HGNC Symbol;Acc:HGNC:1996]	Yes
GREM1	ENSG00000166923	4.1447	1.07437e-07	gremlin 1, DAN family BMP antagonist [Source:HGNC Symbol;Acc:HGNC:2001]	Yes
HRH2	ENSG00000113749	3.21262	1.10102e-07	histamine receptor H2 [Source:HGNC Symbol;Acc:HGNC:5183]	Yes
TMEM106B	ENSG00000106460	0.649253	1.22596e-07	transmembrane protein 106B [Source:HGNC Symbol;Acc:HGNC:22407]
IL13RA2	ENSG00000123496	4.05745	1.23668e-07	interleukin 13 receptor subunit alpha 2 [Source:HGNC Symbol;Acc:HGNC:5975]	Yes
SHISA2	ENSG00000180730	-2.28536	1.32867e-07	shisa family member 2 [Source:HGNC Symbol;Acc:HGNC:20366]	Yes
FN1	ENSG00000115414	-1.54495	1.56862e-07	fibronectin 1 [Source:HGNC Symbol;Acc:HGNC:3778]	Yes
TCF21	ENSG00000118526	4.86433	1.6447e-07	transcription factor 21 [Source:HGNC Symbol;Acc:HGNC:11632]	Yes
TNFAIP8L1	ENSG00000185361	-1.43438	1.6447e-07	TNF alpha induced protein 8 like 1 [Source:HGNC Symbol;Acc:HGNC:28279]
MAPK11	ENSG00000185386	-1.27086	1.83693e-07	mitogen-activated protein kinase 11 [Source:HGNC Symbol;Acc:HGNC:6873]
PTPRD-AS1	ENSG00000225706	5.7802	1.88821e-07	PTPRD antisense RNA 1 [Source:HGNC Symbol;Acc:HGNC:49753]	Yes
GALNT18	ENSG00000110328	2.29858	2.06732e-07	polypeptide N-acetylgalactosaminyltransferase 18 [Source:HGNC Symbol;Acc:HGNC:30488]	Yes
FRMD5	ENSG00000171877	-1.40001	2.28045e-07	FERM domain containing 5 [Source:HGNC Symbol;Acc:HGNC:28214]
FGF7P6	ENSG00000227449	2.1557	2.46171e-07	fibroblast growth factor 7 pseudogene 6 [Source:HGNC Symbol;Acc:HGNC:27852]	Yes
GAD1	ENSG00000128683	4.58751	2.53076e-07	glutamate decarboxylase 1 [Source:HGNC Symbol;Acc:HGNC:4092]	Yes
CD86	ENSG00000114013	6.46224	2.55922e-07	CD86 molecule [Source:HGNC Symbol;Acc:HGNC:1705]	Yes
ENSG00000227496	ENSG00000227496	2.43085	2.8811e-07	novel transcript	Yes
PM20D2	ENSG00000146281	2.10198	3.12485e-07	peptidase M20 domain containing 2 [Source:HGNC Symbol;Acc:HGNC:21408]	Yes
CHMP1B	ENSG00000255112	1.27741	3.14141e-07	charged multivesicular body protein 1B [Source:HGNC Symbol;Acc:HGNC:24287]
ENSG00000267640	ENSG00000267640	1.4913	3.30596e-07	novel zinc finger protein pseudogene
RRM2B	ENSG00000048392	0.922213	3.43484e-07	ribonucleotide reductase regulatory TP53 inducible subunit M2B [Source:HGNC Symbol;Acc:HGNC:17296]
HEY2	ENSG00000135547	4.15178	3.60319e-07	hes related family bHLH transcription factor with YRPW motif 2 [Source:HGNC Symbol;Acc:HGNC:4881]	Yes
ID2	ENSG00000115738	1.96056	3.62011e-07	inhibitor of DNA binding 2 [Source:HGNC Symbol;Acc:HGNC:5361]	Yes
HSD17B12	ENSG00000149084	1.22285	3.79715e-07	hydroxysteroid 17-beta dehydrogenase 12 [Source:HGNC Symbol;Acc:HGNC:18646]
APH1B	ENSG00000138613	0.803784	3.80544e-07	aph-1 homolog B, gamma-secretase subunit [Source:HGNC Symbol;Acc:HGNC:24080]
SCGB3A2	ENSG00000164265	6.8619	3.92129e-07	secretoglobin family 3A member 2 [Source:HGNC Symbol;Acc:HGNC:18391]	Yes
PSEN2	ENSG00000143801	1.1492	3.93541e-07	presenilin 2 [Source:HGNC Symbol;Acc:HGNC:9509]
CSF2RB	ENSG00000100368	3.94663	4.18397e-07	colony stimulating factor 2 receptor subunit beta [Source:HGNC Symbol;Acc:HGNC:2436]	Yes
SLC17A5	ENSG00000119899	1.28692	4.18778e-07	solute carrier family 17 member 5 [Source:HGNC Symbol;Acc:HGNC:10933]
SERINC3	ENSG00000132824	0.606488	4.20185e-07	serine incorporator 3 [Source:HGNC Symbol;Acc:HGNC:11699]
TFEB	ENSG00000112561	-1.65346	4.26148e-07	transcription factor EB [Source:HGNC Symbol;Acc:HGNC:11753]	Yes
SNAP91	ENSG00000065609	3.11072	4.30812e-07	synaptosome associated protein 91 [Source:HGNC Symbol;Acc:HGNC:14986]	Yes
AGT	ENSG00000135744	4.38228	4.42143e-07	angiotensinogen [Source:HGNC Symbol;Acc:HGNC:333]	Yes
CCL20	ENSG00000115009	-2.73092	4.51274e-07	C-C motif chemokine ligand 20 [Source:HGNC Symbol;Acc:HGNC:10619]	Yes
PLEKHG4	ENSG00000196155	2.23018	4.90219e-07	pleckstrin homology and RhoGEF domain containing G4 [Source:HGNC Symbol;Acc:HGNC:24501]	Yes
KCND1	ENSG00000102057	-2.03044	4.91048e-07	potassium voltage-gated channel subfamily D member 1 [Source:HGNC Symbol;Acc:HGNC:6237]	Yes
PDE4DIP	ENSG00000178104	0.708976	5.11211e-07	phosphodiesterase 4D interacting protein [Source:HGNC Symbol;Acc:HGNC:15580]
NEGR1	ENSG00000172260	1.76574	5.35693e-07	neuronal growth regulator 1 [Source:HGNC Symbol;Acc:HGNC:17302]	Yes
SLC15A4	ENSG00000139370	0.672366	5.5748e-07	solute carrier family 15 member 4 [Source:HGNC Symbol;Acc:HGNC:23090]
CYP2U1	ENSG00000155016	0.985635	5.60903e-07	cytochrome P450 family 2 subfamily U member 1 [Source:HGNC Symbol;Acc:HGNC:20582]
SLC26A4-AS1	ENSG00000233705	-5.62707	5.61883e-07	SLC26A4 antisense RNA 1 [Source:HGNC Symbol;Acc:HGNC:22385]	Yes
NKIRAS1	ENSG00000197885	1.12108	5.71085e-07	NFKB inhibitor interacting Ras like 1 [Source:HGNC Symbol;Acc:HGNC:17899]
INHBB	ENSG00000163083	4.05746	5.79198e-07	inhibin subunit beta B [Source:HGNC Symbol;Acc:HGNC:6067]	Yes
FGD6	ENSG00000180263	-1.30501	6.28767e-07	FYVE, RhoGEF and PH domain containing 6 [Source:HGNC Symbol;Acc:HGNC:21740]
SPATS2	ENSG00000123352	-0.762659	6.29273e-07	spermatogenesis associated serine rich 2 [Source:HGNC Symbol;Acc:HGNC:18650]
MAGED4	ENSG00000154545	-0.744631	6.48422e-07	MAGE family member D4 [Source:HGNC Symbol;Acc:HGNC:23793]
MEGF10	ENSG00000145794	3.29229	7.18999e-07	multiple EGF like domains 10 [Source:HGNC Symbol;Acc:HGNC:29634]	Yes
LINC-PINT	ENSG00000231721	0.83587	7.26166e-07	long intergenic non-protein coding RNA, p53 induced transcript [Source:HGNC Symbol;Acc:HGNC:26885]
TMEM38B	ENSG00000095209	1.49066	7.33059e-07	transmembrane protein 38B [Source:HGNC Symbol;Acc:HGNC:25535]
NPTX2	ENSG00000106236	3.77396	7.4725e-07	neuronal pentraxin 2 [Source:HGNC Symbol;Acc:HGNC:7953]	Yes
RND3	ENSG00000115963	1.47403	7.60889e-07	Rho family GTPase 3 [Source:HGNC Symbol;Acc:HGNC:671]
PRR29	ENSG00000224383	-2.93354	7.77151e-07	proline rich 29 [Source:HGNC Symbol;Acc:HGNC:25673]	Yes
RIPOR2	ENSG00000111913	2.40976	7.82166e-07	RHO family interacting cell polarization regulator 2 [Source:HGNC Symbol;Acc:HGNC:13872]	Yes
BAG2	ENSG00000112208	1.24698	9.23169e-07	BAG cochaperone 2 [Source:HGNC Symbol;Acc:HGNC:938]
HOXB8	ENSG00000120068	-5.45891	9.7471e-07	homeobox B8 [Source:HGNC Symbol;Acc:HGNC:5119]	Yes
INO80C	ENSG00000153391	1.02399	9.7471e-07	INO80 complex subunit C [Source:HGNC Symbol;Acc:HGNC:26994]
ROBO4	ENSG00000154133	-3.57725	9.7471e-07	roundabout guidance receptor 4 [Source:HGNC Symbol;Acc:HGNC:17985]	Yes
PPM1L	ENSG00000163590	1.77679	9.8975e-07	protein phosphatase, Mg2+/Mn2+ dependent 1L [Source:HGNC Symbol;Acc:HGNC:16381]	Yes
ADAMTS12	ENSG00000151388	-2.26825	9.93515e-07	ADAM metallopeptidase with thrombospondin type 1 motif 12 [Source:HGNC Symbol;Acc:HGNC:14605]	Yes
KRTAP1-5	ENSG00000221852	4.10793	1.0204e-06	keratin associated protein 1-5 [Source:HGNC Symbol;Acc:HGNC:16777]	Yes
PLAT	ENSG00000104368	-1.91082	1.08819e-06	plasminogen activator, tissue type [Source:HGNC Symbol;Acc:HGNC:9051]	Yes
DNAJC6	ENSG00000116675	1.93395	1.10387e-06	DnaJ heat shock protein family (Hsp40) member C6 [Source:HGNC Symbol;Acc:HGNC:15469]	Yes
HACD3	ENSG00000074696	0.727042	1.10887e-06	3-hydroxyacyl-CoA dehydratase 3 [Source:HGNC Symbol;Acc:HGNC:24175]
MAMDC4	ENSG00000177943	-1.78759	1.12048e-06	MAM domain containing 4 [Source:HGNC Symbol;Acc:HGNC:24083]	Yes
ENSG00000232774	ENSG00000232774	-1.76367	1.13804e-06	novel transcript	Yes
PPP2R1B	ENSG00000137713	0.878979	1.15824e-06	protein phosphatase 2 scaffold subunit Abeta [Source:HGNC Symbol;Acc:HGNC:9303]
TBX15	ENSG00000092607	1.40265	1.16554e-06	T-box transcription factor 15 [Source:HGNC Symbol;Acc:HGNC:11594]
GALNT16	ENSG00000100626	2.16848	1.17984e-06	polypeptide N-acetylgalactosaminyltransferase 16 [Source:HGNC Symbol;Acc:HGNC:23233]	Yes
ISYNA1	ENSG00000105655	-1.59033	1.17984e-06	inositol-3-phosphate synthase 1 [Source:HGNC Symbol;Acc:HGNC:29821]	Yes
ENSG00000248479	ENSG00000248479	5.93847	1.18354e-06	novel transcript	Yes
ZDHHC15	ENSG00000102383	2.86847	1.18877e-06	zinc finger DHHC-type palmitoyltransferase 15 [Source:HGNC Symbol;Acc:HGNC:20342]	Yes
BMPR1B	ENSG00000138696	1.77966	1.34161e-06	bone morphogenetic protein receptor type 1B [Source:HGNC Symbol;Acc:HGNC:1077]	Yes
EGR1	ENSG00000120738	-2.16024	1.46563e-06	early growth response 1 [Source:HGNC Symbol;Acc:HGNC:3238]	Yes
SLC20A1-DT	ENSG00000237753	-1.48752	1.52558e-06	SLC20A1 divergent transcript [Source:HGNC Symbol;Acc:HGNC:55651]
LOXL3	ENSG00000115318	1.3551	1.57729e-06	lysyl oxidase like 3 [Source:HGNC Symbol;Acc:HGNC:13869]
SLC38A1	ENSG00000111371	1.28177	1.58147e-06	solute carrier family 38 member 1 [Source:HGNC Symbol;Acc:HGNC:13447]
ZFP69B	ENSG00000187801	-0.933653	1.58322e-06	ZFP69 zinc finger protein B [Source:HGNC Symbol;Acc:HGNC:28053]
AK3	ENSG00000147853	0.73695	1.59438e-06	adenylate kinase 3 [Source:HGNC Symbol;Acc:HGNC:17376]
TG	ENSG00000042832	-1.81463	1.60304e-06	thyroglobulin [Source:HGNC Symbol;Acc:HGNC:11764]	Yes
ARL8B	ENSG00000134108	0.801215	1.60304e-06	ADP ribosylation factor like GTPase 8B [Source:HGNC Symbol;Acc:HGNC:25564]
MIAT	ENSG00000225783	-3.25019	1.60304e-06	myocardial infarction associated transcript [Source:HGNC Symbol;Acc:HGNC:33425]	Yes
PGLS-DT	ENSG00000269439	-0.997307	1.63372e-06	PGLS divergent transcript [Source:HGNC Symbol;Acc:HGNC:55274]
IPCEF1	ENSG00000074706	2.72996	1.69928e-06	interaction protein for cytohesin exchange factors 1 [Source:HGNC Symbol;Acc:HGNC:21204]	Yes
EYA4	ENSG00000112319	3.2005	1.69928e-06	EYA transcriptional coactivator and phosphatase 4 [Source:HGNC Symbol;Acc:HGNC:3522]	Yes
FUCA1	ENSG00000179163	1.30763	1.69928e-06	alpha-L-fucosidase 1 [Source:HGNC Symbol;Acc:HGNC:4006]
FAM156B	ENSG00000179304	-0.942639	1.71903e-06	family with sequence similarity 156 member B [Source:HGNC Symbol;Acc:HGNC:31962]
LINC01121	ENSG00000205054	6.01953	1.80624e-06	long intergenic non-protein coding RNA 1121 [Source:HGNC Symbol;Acc:HGNC:49266]	Yes
SLITRK6	ENSG00000184564	3.84405	1.92573e-06	SLIT and NTRK like family member 6 [Source:HGNC Symbol;Acc:HGNC:23503]	Yes
TMEM62	ENSG00000137842	1.05031	2.01003e-06	transmembrane protein 62 [Source:HGNC Symbol;Acc:HGNC:26269]
RETREG1	ENSG00000154153	2.75146	2.01003e-06	reticulophagy regulator 1 [Source:HGNC Symbol;Acc:HGNC:25964]	Yes
CARD10	ENSG00000100065	-2.06237	2.04387e-06	caspase recruitment domain family member 10 [Source:HGNC Symbol;Acc:HGNC:16422]	Yes
NPC1	ENSG00000141458	1.15253	2.1272e-06	NPC intracellular cholesterol transporter 1 [Source:HGNC Symbol;Acc:HGNC:7897]
GYG2P1	ENSG00000206159	-5.98004	2.1272e-06	glycogenin 2 pseudogene 1 [Source:HGNC Symbol;Acc:HGNC:4701]	Yes
ELOVL4	ENSG00000118402	0.82554	2.13298e-06	ELOVL fatty acid elongase 4 [Source:HGNC Symbol;Acc:HGNC:14415]
ARMCX3	ENSG00000102401	0.735848	2.22259e-06	armadillo repeat containing X-linked 3 [Source:HGNC Symbol;Acc:HGNC:24065]
SOAT1	ENSG00000057252	0.789418	2.28976e-06	sterol O-acyltransferase 1 [Source:HGNC Symbol;Acc:HGNC:11177]
THBD	ENSG00000178726	4.00781	2.29803e-06	thrombomodulin [Source:HGNC Symbol;Acc:HGNC:11784]	Yes
STX1B	ENSG00000099365	-2.48094	2.31886e-06	syntaxin 1B [Source:HGNC Symbol;Acc:HGNC:18539]	Yes
HSPA4L	ENSG00000164070	1.33175	2.35993e-06	heat shock protein family A (Hsp70) member 4 like [Source:HGNC Symbol;Acc:HGNC:17041]
FAM107B	ENSG00000065809	1.53579	2.37867e-06	family with sequence similarity 107 member B [Source:HGNC Symbol;Acc:HGNC:23726]	Yes
BGN	ENSG00000182492	-2.04253	2.45173e-06	biglycan [Source:HGNC Symbol;Acc:HGNC:1044]	Yes
ST6GAL2	ENSG00000144057	-3.6556	2.46983e-06	ST6 beta-galactoside alpha-2,6-sialyltransferase 2 [Source:HGNC Symbol;Acc:HGNC:10861]	Yes
LRCH2	ENSG00000130224	1.51729	2.59267e-06	leucine rich repeats and calponin homology domain containing 2 [Source:HGNC Symbol;Acc:HGNC:29292]	Yes
SEMA4B	ENSG00000185033	-1.16987	2.68046e-06	semaphorin 4B [Source:HGNC Symbol;Acc:HGNC:10730]
FGF10	ENSG00000070193	5.07019	2.68212e-06	fibroblast growth factor 10 [Source:HGNC Symbol;Acc:HGNC:3666]	Yes
CLDND1	ENSG00000080822	0.675131	2.68212e-06	claudin domain containing 1 [Source:HGNC Symbol;Acc:HGNC:1322]
HSPB3	ENSG00000169271	5.96293	2.73612e-06	heat shock protein family B (small) member 3 [Source:HGNC Symbol;Acc:HGNC:5248]	Yes
IL6R	ENSG00000160712	1.53077	2.83756e-06	interleukin 6 receptor [Source:HGNC Symbol;Acc:HGNC:6019]	Yes
HSD17B14	ENSG00000087076	2.85865	2.85777e-06	hydroxysteroid 17-beta dehydrogenase 14 [Source:HGNC Symbol;Acc:HGNC:23238]	Yes
MFSD13A	ENSG00000138111	1.14279	2.87661e-06	major facilitator superfamily domain containing 13A [Source:HGNC Symbol;Acc:HGNC:26196]
CD55	ENSG00000196352	2.23503	3.02659e-06	CD55 molecule (Cromer blood group) [Source:HGNC Symbol;Acc:HGNC:2665]	Yes
ZMPSTE24	ENSG00000084073	0.830491	3.17273e-06	zinc metallopeptidase STE24 [Source:HGNC Symbol;Acc:HGNC:12877]
PRAF2	ENSG00000243279	-0.528607	3.24801e-06	PRA1 domain family member 2 [Source:HGNC Symbol;Acc:HGNC:28911]
LAMB3	ENSG00000196878	2.09307	3.25321e-06	laminin subunit beta 3 [Source:HGNC Symbol;Acc:HGNC:6490]	Yes
LAMP3	ENSG00000078081	-3.1893	3.35533e-06	lysosomal associated membrane protein 3 [Source:HGNC Symbol;Acc:HGNC:14582]	Yes
C3orf33	ENSG00000174928	0.884013	3.36571e-06	chromosome 3 open reading frame 33 [Source:HGNC Symbol;Acc:HGNC:26434]
TXK	ENSG00000074966	2.2904	3.4449e-06	TXK tyrosine kinase [Source:HGNC Symbol;Acc:HGNC:12434]	Yes
PIP5KL1	ENSG00000167103	-0.878669	3.4449e-06	phosphatidylinositol-4-phosphate 5-kinase like 1 [Source:HGNC Symbol;Acc:HGNC:28711]
SGCE	ENSG00000127990	1.53667	3.61828e-06	sarcoglycan epsilon [Source:HGNC Symbol;Acc:HGNC:10808]	Yes
PMP22	ENSG00000109099	2.19236	3.74444e-06	peripheral myelin protein 22 [Source:HGNC Symbol;Acc:HGNC:9118]	Yes
ENSG00000225177	ENSG00000225177	-1.6666	3.74444e-06	novel transcript	Yes
C1orf115	ENSG00000162817	3.00392	3.87027e-06	chromosome 1 open reading frame 115 [Source:HGNC Symbol;Acc:HGNC:25873]	Yes
C5orf51	ENSG00000205765	0.561997	3.87027e-06	chromosome 5 open reading frame 51 [Source:HGNC Symbol;Acc:HGNC:27750]
LINC00702	ENSG00000233117	1.73963	3.87027e-06	long intergenic non-protein coding RNA 702 [Source:HGNC Symbol;Acc:HGNC:44676]	Yes
PDE8B	ENSG00000113231	2.97852	3.89194e-06	phosphodiesterase 8B [Source:HGNC Symbol;Acc:HGNC:8794]	Yes
RNF141	ENSG00000110315	0.877775	3.93227e-06	ring finger protein 141 [Source:HGNC Symbol;Acc:HGNC:21159]
EEF2	ENSG00000167658	-0.954562	4.03948e-06	eukaryotic translation elongation factor 2 [Source:HGNC Symbol;Acc:HGNC:3214]
COL25A1	ENSG00000188517	-3.06348	4.10265e-06	collagen type XXV alpha 1 chain [Source:HGNC Symbol;Acc:HGNC:18603]	Yes
PDE7B	ENSG00000171408	2.34126	4.19805e-06	phosphodiesterase 7B [Source:HGNC Symbol;Acc:HGNC:8792]	Yes
ENSG00000257178	ENSG00000257178	-5.074	4.21749e-06	novel transcript, sense intronic to HOXB3	Yes
LTBP3	ENSG00000168056	-1.8942	4.37846e-06	latent transforming growth factor beta binding protein 3 [Source:HGNC Symbol;Acc:HGNC:6716]	Yes
CHRNA9	ENSG00000174343	4.71941	4.54581e-06	cholinergic receptor nicotinic alpha 9 subunit [Source:HGNC Symbol;Acc:HGNC:14079]	Yes
NT5DC2	ENSG00000168268	-1.11442	4.69996e-06	5'-nucleotidase domain containing 2 [Source:HGNC Symbol;Acc:HGNC:25717]
ENSG00000272763	ENSG00000272763	-6.28522	4.76324e-06	novel transcript	Yes
GYPE	ENSG00000197465	3.56094	4.79418e-06	glycophorin E (MNS blood group) [Source:HGNC Symbol;Acc:HGNC:4705]	Yes
SENCR	ENSG00000254703	-1.56296	4.89441e-06	smooth muscle and endothelial cell enriched migration/differentiation-associated lncRNA [Source:HGNC Symbol;Acc:HGNC:44177]	Yes
KRT8	ENSG00000170421	-2.88939	4.90123e-06	keratin 8 [Source:HGNC Symbol;Acc:HGNC:6446]	Yes
C15orf48	ENSG00000166920	3.38143	5.10458e-06	chromosome 15 open reading frame 48 [Source:HGNC Symbol;Acc:HGNC:29898]	Yes
ANO7	ENSG00000146205	-1.33549	5.52804e-06	anoctamin 7 [Source:HGNC Symbol;Acc:HGNC:31677]
WNK4	ENSG00000126562	-4.10679	5.59027e-06	WNK lysine deficient protein kinase 4 [Source:HGNC Symbol;Acc:HGNC:14544]	Yes
CCDC113	ENSG00000103021	0.941514	5.76797e-06	coiled-coil domain containing 113 [Source:HGNC Symbol;Acc:HGNC:25002]
CSMD2	ENSG00000121904	-2.39859	5.76797e-06	CUB and Sushi multiple domains 2 [Source:HGNC Symbol;Acc:HGNC:19290]	Yes
DPF3	ENSG00000205683	-1.57799	6.10034e-06	double PHD fingers 3 [Source:HGNC Symbol;Acc:HGNC:17427]	Yes
CEPT1	ENSG00000134255	0.706633	6.17627e-06	choline/ethanolamine phosphotransferase 1 [Source:HGNC Symbol;Acc:HGNC:24289]
LRRC2	ENSG00000163827	3.169	6.36527e-06	leucine rich repeat containing 2 [Source:HGNC Symbol;Acc:HGNC:14676]	Yes
MAGED4B	ENSG00000187243	-0.943611	6.8772e-06	MAGE family member D4B [Source:HGNC Symbol;Acc:HGNC:22880]
SLC44A3	ENSG00000143036	2.2493	7.00608e-06	solute carrier family 44 member 3 [Source:HGNC Symbol;Acc:HGNC:28689]	Yes
OLFM1	ENSG00000130558	2.43609	7.01719e-06	olfactomedin 1 [Source:HGNC Symbol;Acc:HGNC:17187]	Yes
NPR3	ENSG00000113389	1.80884	7.04127e-06	natriuretic peptide receptor 3 [Source:HGNC Symbol;Acc:HGNC:7945]	Yes
EFL1	ENSG00000140598	0.806578	7.24456e-06	elongation factor like GTPase 1 [Source:HGNC Symbol;Acc:HGNC:25789]
REEP5	ENSG00000129625	0.967289	7.55336e-06	receptor accessory protein 5 [Source:HGNC Symbol;Acc:HGNC:30077]
ADAMTSL2	ENSG00000197859	-6.36008	7.60301e-06	ADAMTS like 2 [Source:HGNC Symbol;Acc:HGNC:14631]	Yes
EXOSC9	ENSG00000123737	0.941781	7.62188e-06	exosome component 9 [Source:HGNC Symbol;Acc:HGNC:9137]
TIMP3	ENSG00000100234	-1.15265	7.63761e-06	TIMP metallopeptidase inhibitor 3 [Source:HGNC Symbol;Acc:HGNC:11822]
ERRFI1	ENSG00000116285	-1.3634	7.75637e-06	ERBB receptor feedback inhibitor 1 [Source:HGNC Symbol;Acc:HGNC:18185]
SFTA1P	ENSG00000225383	3.03851	7.8233e-06	surfactant associated 1, lncRNA [Source:HGNC Symbol;Acc:HGNC:18383]	Yes
CXCL16	ENSG00000161921	2.41419	8.0818e-06	C-X-C motif chemokine ligand 16 [Source:HGNC Symbol;Acc:HGNC:16642]	Yes
LINC01013	ENSG00000228495	3.07599	8.13917e-06	long intergenic non-protein coding RNA 1013 [Source:HGNC Symbol;Acc:HGNC:48987]	Yes
TNXB	ENSG00000168477	2.69143	8.14082e-06	tenascin XB [Source:HGNC Symbol;Acc:HGNC:11976]	Yes
SGCD	ENSG00000170624	1.79269	8.14082e-06	sarcoglycan delta [Source:HGNC Symbol;Acc:HGNC:10807]	Yes
TRAM1	ENSG00000067167	0.79643	8.68173e-06	translocation associated membrane protein 1 [Source:HGNC Symbol;Acc:HGNC:20568]
LIMD2	ENSG00000136490	-1.39049	8.72355e-06	LIM domain containing 2 [Source:HGNC Symbol;Acc:HGNC:28142]
REPS2	ENSG00000169891	-2.03978	8.72355e-06	RALBP1 associated Eps domain containing 2 [Source:HGNC Symbol;Acc:HGNC:9963]	Yes
JPH3	ENSG00000154118	4.46099	8.83327e-06	junctophilin 3 [Source:HGNC Symbol;Acc:HGNC:14203]	Yes
GALNT15	ENSG00000131386	3.07939	8.83684e-06	polypeptide N-acetylgalactosaminyltransferase 15 [Source:HGNC Symbol;Acc:HGNC:21531]	Yes
CTSK	ENSG00000143387	3.36528	8.83733e-06	cathepsin K [Source:HGNC Symbol;Acc:HGNC:2536]	Yes
GDPD5	ENSG00000158555	-1.42535	8.83733e-06	glycerophosphodiester phosphodiesterase domain containing 5 [Source:HGNC Symbol;Acc:HGNC:28804]
SPINK1	ENSG00000164266	6.33919	8.9068e-06	serine peptidase inhibitor Kazal type 1 [Source:HGNC Symbol;Acc:HGNC:11244]	Yes
ST3GAL6-AS1	ENSG00000239445	-2.3829	9.00988e-06	ST3GAL6 antisense RNA 1 [Source:HGNC Symbol;Acc:HGNC:40828]	Yes
NUDT10	ENSG00000122824	1.88818	9.07508e-06	nudix hydrolase 10 [Source:HGNC Symbol;Acc:HGNC:17621]	Yes
KRT18P17	ENSG00000213943	-4.48759	9.16383e-06	keratin 18 pseudogene 17 [Source:HGNC Symbol;Acc:HGNC:33385]	Yes
MPC2	ENSG00000143158	1.42772	9.2071e-06	mitochondrial pyruvate carrier 2 [Source:HGNC Symbol;Acc:HGNC:24515]
KIAA1549L	ENSG00000110427	-1.48365	9.21627e-06	KIAA1549 like [Source:HGNC Symbol;Acc:HGNC:24836]
MCTP2	ENSG00000140563	3.38736	9.22855e-06	multiple C2 and transmembrane domain containing 2 [Source:HGNC Symbol;Acc:HGNC:25636]	Yes
LITAF	ENSG00000189067	1.6116	9.42141e-06	lipopolysaccharide induced TNF factor [Source:HGNC Symbol;Acc:HGNC:16841]	Yes
ENSG00000279086	ENSG00000279086	-1.94674	9.56874e-06	TEC	Yes
SVIL	ENSG00000197321	-1.73177	9.57134e-06	supervillin [Source:HGNC Symbol;Acc:HGNC:11480]	Yes
GPD1L	ENSG00000152642	1.01756	1.00027e-05	glycerol-3-phosphate dehydrogenase 1 like [Source:HGNC Symbol;Acc:HGNC:28956]
PXDN	ENSG00000130508	-1.24434	1.01804e-05	peroxidasin [Source:HGNC Symbol;Acc:HGNC:14966]
RPLP0P2	ENSG00000243742	-1.96806	1.0204e-05	ribosomal protein lateral stalk subunit P0 pseudogene 2 [Source:HGNC Symbol;Acc:HGNC:17960]	Yes
SARAF	ENSG00000133872	0.836689	1.03331e-05	store-operated calcium entry associated regulatory factor [Source:HGNC Symbol;Acc:HGNC:28789]
PDE4C	ENSG00000105650	-2.57478	1.05507e-05	phosphodiesterase 4C [Source:HGNC Symbol;Acc:HGNC:8782]	Yes
ARRB1	ENSG00000137486	-2.24158	1.05507e-05	arrestin beta 1 [Source:HGNC Symbol;Acc:HGNC:711]	Yes
ENSG00000255031	ENSG00000255031	-1.4529	1.08433e-05	novel transcript, antisense to CHKA
ARNT2	ENSG00000172379	-0.93906	1.08439e-05	aryl hydrocarbon receptor nuclear translocator 2 [Source:HGNC Symbol;Acc:HGNC:16876]
CA5B	ENSG00000169239	1.08785	1.11426e-05	carbonic anhydrase 5B [Source:HGNC Symbol;Acc:HGNC:1378]
PRDM1	ENSG00000057657	-2.25159	1.12469e-05	PR/SET domain 1 [Source:HGNC Symbol;Acc:HGNC:9346]	Yes
TMCC1-DT	ENSG00000271270	1.32095	1.15008e-05	TMCC1 divergent transcript [Source:HGNC Symbol;Acc:HGNC:49060]
THRB	ENSG00000151090	5.07996	1.17761e-05	thyroid hormone receptor beta [Source:HGNC Symbol;Acc:HGNC:11799]	Yes
ROR1	ENSG00000185483	-1.07394	1.17761e-05	receptor tyrosine kinase like orphan receptor 1 [Source:HGNC Symbol;Acc:HGNC:10256]
FOXQ1	ENSG00000164379	3.89006	1.20102e-05	forkhead box Q1 [Source:HGNC Symbol;Acc:HGNC:20951]	Yes
LEP	ENSG00000174697	5.62902	1.2117e-05	leptin [Source:HGNC Symbol;Acc:HGNC:6553]	Yes
FAM27E3	ENSG00000274026	-1.68539	1.25408e-05	family with sequence similarity 27 member E3 [Source:HGNC Symbol;Acc:HGNC:28655]	Yes
ZBTB12	ENSG00000204366	-1.04954	1.25939e-05	zinc finger and BTB domain containing 12 [Source:HGNC Symbol;Acc:HGNC:19066]
SERPINI1	ENSG00000163536	2.53726	1.26719e-05	serpin family I member 1 [Source:HGNC Symbol;Acc:HGNC:8943]	Yes
CDC6	ENSG00000094804	1.46169	1.27455e-05	cell division cycle 6 [Source:HGNC Symbol;Acc:HGNC:1744]
MAFG-DT	ENSG00000265688	-1.05796	1.28691e-05	MAFG divergent transcript [Source:HGNC Symbol;Acc:HGNC:43649]
GNAL	ENSG00000141404	2.02202	1.29818e-05	G protein subunit alpha L [Source:HGNC Symbol;Acc:HGNC:4388]	Yes
GALNT14	ENSG00000158089	3.73972	1.3015e-05	polypeptide N-acetylgalactosaminyltransferase 14 [Source:HGNC Symbol;Acc:HGNC:22946]	Yes
NSF	ENSG00000073969	0.89846	1.37492e-05	N-ethylmaleimide sensitive factor, vesicle fusing ATPase [Source:HGNC Symbol;Acc:HGNC:8016]
FSTL4	ENSG00000053108	5.18226	1.41266e-05	follistatin like 4 [Source:HGNC Symbol;Acc:HGNC:21389]	Yes
APLP1	ENSG00000105290	-1.57112	1.41266e-05	amyloid beta precursor like protein 1 [Source:HGNC Symbol;Acc:HGNC:597]	Yes
IBSP	ENSG00000029559	2.91533	1.4199e-05	integrin binding sialoprotein [Source:HGNC Symbol;Acc:HGNC:5341]	Yes
SIX1	ENSG00000126778	1.56766	1.4199e-05	SIX homeobox 1 [Source:HGNC Symbol;Acc:HGNC:10887]	Yes
EID1	ENSG00000255302	0.645768	1.45233e-05	EP300 interacting inhibitor of differentiation 1 [Source:HGNC Symbol;Acc:HGNC:1191]
ERBB4	ENSG00000178568	5.75291	1.45747e-05	erb-b2 receptor tyrosine kinase 4 [Source:HGNC Symbol;Acc:HGNC:3432]	Yes
ARL6IP5	ENSG00000144746	1.37924	1.52623e-05	ADP ribosylation factor like GTPase 6 interacting protein 5 [Source:HGNC Symbol;Acc:HGNC:16937]
CHAC1	ENSG00000128965	-1.37611	1.53357e-05	ChaC glutathione specific gamma-glutamylcyclotransferase 1 [Source:HGNC Symbol;Acc:HGNC:28680]
AVPI1	ENSG00000119986	1.56221	1.62166e-05	arginine vasopressin induced 1 [Source:HGNC Symbol;Acc:HGNC:30898]	Yes
KLHDC3	ENSG00000124702	-0.661361	1.62418e-05	kelch domain containing 3 [Source:HGNC Symbol;Acc:HGNC:20704]
ENSG00000225170	ENSG00000225170	2.46212	1.65077e-05	suppression of tumorigenicity 13 (colon carcinoma) (Hsp70 interacting protein) pseudogene	Yes
PAK3	ENSG00000077264	-1.13794	1.66888e-05	p21 (RAC1) activated kinase 3 [Source:HGNC Symbol;Acc:HGNC:8592]
MOB4	ENSG00000115540	0.997776	1.72334e-05	MOB family member 4, phocein [Source:HGNC Symbol;Acc:HGNC:17261]
SPPL2A	ENSG00000138600	0.494708	1.77039e-05	signal peptide peptidase like 2A [Source:HGNC Symbol;Acc:HGNC:30227]
GSC	ENSG00000133937	2.62409	1.77431e-05	goosecoid homeobox [Source:HGNC Symbol;Acc:HGNC:4612]	Yes
LINC01638	ENSG00000233521	-2.81218	1.77431e-05	long intergenic non-protein coding RNA 1638 [Source:HGNC Symbol;Acc:HGNC:52425]	Yes
PON2	ENSG00000105854	1.17046	1.7906e-05	paraoxonase 2 [Source:HGNC Symbol;Acc:HGNC:9205]
TMEM108	ENSG00000144868	2.53801	1.7906e-05	transmembrane protein 108 [Source:HGNC Symbol;Acc:HGNC:28451]	Yes
CGB7	ENSG00000196337	-2.87138	1.7906e-05	chorionic gonadotropin subunit beta 7 [Source:HGNC Symbol;Acc:HGNC:16451]	Yes
GNG11	ENSG00000127920	1.82746	1.80591e-05	G protein subunit gamma 11 [Source:HGNC Symbol;Acc:HGNC:4403]	Yes
TPD52	ENSG00000076554	3.7995	1.81185e-05	tumor protein D52 [Source:HGNC Symbol;Acc:HGNC:12005]	Yes
RAI2	ENSG00000131831	3.41598	1.88289e-05	retinoic acid induced 2 [Source:HGNC Symbol;Acc:HGNC:9835]	Yes
OMG	ENSG00000126861	3.26326	1.92784e-05	oligodendrocyte myelin glycoprotein [Source:HGNC Symbol;Acc:HGNC:8135]	Yes
ENSG00000272235	ENSG00000272235	-3.01147	1.93186e-05	novel transcript	Yes
F2RL1	ENSG00000164251	-2.51665	1.95254e-05	F2R like trypsin receptor 1 [Source:HGNC Symbol;Acc:HGNC:3538]	Yes
PELATON	ENSG00000224397	3.44748	1.99986e-05	plaque enriched lncRNA in atherosclerotic and inflammatory bowel macrophage regulation [Source:HGNC Symbol;Acc:HGNC:50328]	Yes
GPR27	ENSG00000170837	3.2066	2.0245e-05	G protein-coupled receptor 27 [Source:HGNC Symbol;Acc:HGNC:4482]	Yes
STON2	ENSG00000140022	3.70005	2.04827e-05	stonin 2 [Source:HGNC Symbol;Acc:HGNC:30652]	Yes
TRIM67	ENSG00000119283	3.14705	2.05929e-05	tripartite motif containing 67 [Source:HGNC Symbol;Acc:HGNC:31859]	Yes
TGFBR1	ENSG00000106799	1.57967	2.09807e-05	transforming growth factor beta receptor 1 [Source:HGNC Symbol;Acc:HGNC:11772]	Yes
KCTD11	ENSG00000213859	-0.984323	2.14051e-05	potassium channel tetramerization domain containing 11 [Source:HGNC Symbol;Acc:HGNC:21302]
PAPLN-AS1	ENSG00000258376	-1.80824	2.15865e-05	PAPLN antisense RNA 1 [Source:HGNC Symbol;Acc:HGNC:55451]	Yes
PRIM2	ENSG00000146143	1.16684	2.3317e-05	DNA primase subunit 2 [Source:HGNC Symbol;Acc:HGNC:9370]
TGFA	ENSG00000163235	5.33227	2.39627e-05	transforming growth factor alpha [Source:HGNC Symbol;Acc:HGNC:11765]	Yes
CASD1	ENSG00000127995	0.785418	2.47081e-05	CAS1 domain containing 1 [Source:HGNC Symbol;Acc:HGNC:16014]
C5orf15	ENSG00000113583	0.813691	2.55158e-05	chromosome 5 open reading frame 15 [Source:HGNC Symbol;Acc:HGNC:20656]
LDOC1	ENSG00000182195	-0.933687	2.55543e-05	LDOC1 regulator of NFKB signaling [Source:HGNC Symbol;Acc:HGNC:6548]
BCL3	ENSG00000069399	-1.50643	2.55935e-05	BCL3 transcription coactivator [Source:HGNC Symbol;Acc:HGNC:998]	Yes
SH3D21	ENSG00000214193	-2.08833	2.63183e-05	SH3 domain containing 21 [Source:HGNC Symbol;Acc:HGNC:26236]	Yes
GPR68	ENSG00000119714	-1.86062	2.65056e-05	G protein-coupled receptor 68 [Source:HGNC Symbol;Acc:HGNC:4519]	Yes
KCNG1	ENSG00000026559	-1.94666	2.85479e-05	potassium voltage-gated channel modifier subfamily G member 1 [Source:HGNC Symbol;Acc:HGNC:6248]	Yes
FAM171B	ENSG00000144369	0.943641	2.86456e-05	family with sequence similarity 171 member B [Source:HGNC Symbol;Acc:HGNC:29412]
FAM3C	ENSG00000196937	0.874423	2.91521e-05	FAM3 metabolism regulating signaling molecule C [Source:HGNC Symbol;Acc:HGNC:18664]
YIPF6	ENSG00000181704	0.584206	2.95999e-05	Yip1 domain family member 6 [Source:HGNC Symbol;Acc:HGNC:28304]
SLC22A17	ENSG00000092096	-0.91318	2.96493e-05	solute carrier family 22 member 17 [Source:HGNC Symbol;Acc:HGNC:23095]
CEMIP	ENSG00000103888	-2.25203	3.00502e-05	cell migration inducing hyaluronidase 1 [Source:HGNC Symbol;Acc:HGNC:29213]	Yes
ENSG00000272338	ENSG00000272338	1.26117	3.00502e-05	novel transcript
ANXA8L1	ENSG00000264230	-2.87028	3.03692e-05	annexin A8 like 1 [Source:HGNC Symbol;Acc:HGNC:23334]	Yes
KY	ENSG00000174611	-1.93186	3.14121e-05	kyphoscoliosis peptidase [Source:HGNC Symbol;Acc:HGNC:26576]	Yes
BMI1	ENSG00000168283	0.849319	3.198e-05	BMI1 proto-oncogene, polycomb ring finger [Source:HGNC Symbol;Acc:HGNC:1066]
PTPN22	ENSG00000134242	-1.21253	3.30734e-05	protein tyrosine phosphatase non-receptor type 22 [Source:HGNC Symbol;Acc:HGNC:9652]
ENTPD3	ENSG00000168032	3.26366	3.326e-05	ectonucleoside triphosphate diphosphohydrolase 3 [Source:HGNC Symbol;Acc:HGNC:3365]	Yes
KCNK2	ENSG00000082482	1.94375	3.37675e-05	potassium two pore domain channel subfamily K member 2 [Source:HGNC Symbol;Acc:HGNC:6277]	Yes
RP2	ENSG00000102218	0.649438	3.41295e-05	RP2 activator of ARL3 GTPase [Source:HGNC Symbol;Acc:HGNC:10274]
MMD	ENSG00000108960	1.23058	3.41837e-05	monocyte to macrophage differentiation associated [Source:HGNC Symbol;Acc:HGNC:7153]
VWA1	ENSG00000179403	-2.63822	3.49586e-05	von Willebrand factor A domain containing 1 [Source:HGNC Symbol;Acc:HGNC:30910]	Yes
CD47	ENSG00000196776	0.88516	3.49586e-05	CD47 molecule [Source:HGNC Symbol;Acc:HGNC:1682]
ATP2A3	ENSG00000074370	1.81404	3.52981e-05	ATPase sarcoplasmic/endoplasmic reticulum Ca2+ transporting 3 [Source:HGNC Symbol;Acc:HGNC:813]	Yes
TFAP2C	ENSG00000087510	8.77739	3.55368e-05	transcription factor AP-2 gamma [Source:HGNC Symbol;Acc:HGNC:11744]	Yes
SPEG	ENSG00000072195	-2.09855	3.64537e-05	striated muscle enriched protein kinase [Source:HGNC Symbol;Acc:HGNC:16901]	Yes
ENSG00000279453	ENSG00000279453	0.882847	3.79231e-05	TEC
STEAP1	ENSG00000164647	1.6426	3.83184e-05	STEAP family member 1 [Source:HGNC Symbol;Acc:HGNC:11378]	Yes
ASPH	ENSG00000198363	0.730129	4.00126e-05	aspartate beta-hydroxylase [Source:HGNC Symbol;Acc:HGNC:757]
RIPK3	ENSG00000129465	3.30844	4.00194e-05	receptor interacting serine/threonine kinase 3 [Source:HGNC Symbol;Acc:HGNC:10021]	Yes
CYB5R1	ENSG00000159348	1.12929	4.01616e-05	cytochrome b5 reductase 1 [Source:HGNC Symbol;Acc:HGNC:13397]
ESYT3	ENSG00000158220	1.99627	4.05909e-05	extended synaptotagmin 3 [Source:HGNC Symbol;Acc:HGNC:24295]	Yes
CDS1	ENSG00000163624	2.01336	4.05909e-05	CDP-diacylglycerol synthase 1 [Source:HGNC Symbol;Acc:HGNC:1800]	Yes
SH3BP1	ENSG00000100092	-1.64823	4.1112e-05	SH3 domain binding protein 1 [Source:HGNC Symbol;Acc:HGNC:10824]	Yes
RAPGEF4	ENSG00000091428	-1.9276	4.13484e-05	Rap guanine nucleotide exchange factor 4 [Source:HGNC Symbol;Acc:HGNC:16626]	Yes
ADAMTS16	ENSG00000145536	-4.30619	4.20239e-05	ADAM metallopeptidase with thrombospondin type 1 motif 16 [Source:HGNC Symbol;Acc:HGNC:17108]	Yes
CRIP2	ENSG00000182809	-1.03464	4.273e-05	cysteine rich protein 2 [Source:HGNC Symbol;Acc:HGNC:2361]
NTNG1	ENSG00000162631	3.45326	4.35254e-05	netrin G1 [Source:HGNC Symbol;Acc:HGNC:23319]	Yes
APCDD1	ENSG00000154856	3.80658	4.61528e-05	APC down-regulated 1 [Source:HGNC Symbol;Acc:HGNC:15718]	Yes
SNHG18	ENSG00000250786	-0.79193	4.61528e-05	small nucleolar RNA host gene 18 [Source:HGNC Symbol;Acc:HGNC:49007]
CXCL14	ENSG00000145824	3.66462	4.68885e-05	C-X-C motif chemokine ligand 14 [Source:HGNC Symbol;Acc:HGNC:10640]	Yes
EXTL1	ENSG00000158008	-2.26036	4.84746e-05	exostosin like glycosyltransferase 1 [Source:HGNC Symbol;Acc:HGNC:3515]	Yes
ISM1	ENSG00000101230	2.24391	4.89027e-05	isthmin 1 [Source:HGNC Symbol;Acc:HGNC:16213]	Yes
UBE2B	ENSG00000119048	0.581365	4.90403e-05	ubiquitin conjugating enzyme E2 B [Source:HGNC Symbol;Acc:HGNC:12473]
OXCT1	ENSG00000083720	0.769861	4.94659e-05	3-oxoacid CoA-transferase 1 [Source:HGNC Symbol;Acc:HGNC:8527]
TKFC	ENSG00000149476	-0.423384	4.97317e-05	triokinase and FMN cyclase [Source:HGNC Symbol;Acc:HGNC:24552]
TREM1	ENSG00000124731	4.25932	4.97628e-05	triggering receptor expressed on myeloid cells 1 [Source:HGNC Symbol;Acc:HGNC:17760]	Yes
FIBCD1	ENSG00000130720	-3.31902	5.00036e-05	fibrinogen C domain containing 1 [Source:HGNC Symbol;Acc:HGNC:25922]	Yes
PLIN4	ENSG00000167676	-1.99787	5.00102e-05	perilipin 4 [Source:HGNC Symbol;Acc:HGNC:29393]	Yes
FRAS1	ENSG00000138759	2.12654	5.0055e-05	Fraser extracellular matrix complex subunit 1 [Source:HGNC Symbol;Acc:HGNC:19185]	Yes
ST6GALNAC5	ENSG00000117069	4.95305	5.00863e-05	ST6 N-acetylgalactosaminide alpha-2,6-sialyltransferase 5 [Source:HGNC Symbol;Acc:HGNC:19342]	Yes
GPR183	ENSG00000169508	4.48239	5.02602e-05	G protein-coupled receptor 183 [Source:HGNC Symbol;Acc:HGNC:3128]	Yes
FER1L4	ENSG00000088340	-2.1338	5.03408e-05	fer-1 like family member 4 (pseudogene) [Source:HGNC Symbol;Acc:HGNC:15801]	Yes
RAG1	ENSG00000166349	1.42694	5.14605e-05	recombination activating 1 [Source:HGNC Symbol;Acc:HGNC:9831]
MAGEL2	ENSG00000254585	-2.36311	5.21098e-05	MAGE family member L2 [Source:HGNC Symbol;Acc:HGNC:6814]	Yes
WNT5A	ENSG00000114251	1.31598	5.33903e-05	Wnt family member 5A [Source:HGNC Symbol;Acc:HGNC:12784]
SYPL1	ENSG00000008282	0.885242	5.35888e-05	synaptophysin like 1 [Source:HGNC Symbol;Acc:HGNC:11507]
NTN1	ENSG00000065320	3.25266	5.52746e-05	netrin 1 [Source:HGNC Symbol;Acc:HGNC:8029]	Yes
GNLY	ENSG00000115523	4.60505	5.52746e-05	granulysin [Source:HGNC Symbol;Acc:HGNC:4414]	Yes
CREG1	ENSG00000143162	1.21833	5.57527e-05	cellular repressor of E1A stimulated genes 1 [Source:HGNC Symbol;Acc:HGNC:2351]
EXD2	ENSG00000081177	0.610958	5.58973e-05	exonuclease 3'-5' domain containing 2 [Source:HGNC Symbol;Acc:HGNC:20217]
ENSG00000279713	ENSG00000279713	-1.63617	5.61939e-05	TEC	Yes
NFATC2	ENSG00000101096	-1.93383	5.76522e-05	nuclear factor of activated T cells 2 [Source:HGNC Symbol;Acc:HGNC:7776]	Yes
PIFO	ENSG00000173947	1.59808	5.76522e-05	primary cilia formation [Source:HGNC Symbol;Acc:HGNC:27009]	Yes
MTMR6	ENSG00000139505	0.670429	5.79899e-05	myotubularin related protein 6 [Source:HGNC Symbol;Acc:HGNC:7453]
PRDM8	ENSG00000152784	-1.43848	5.85777e-05	PR/SET domain 8 [Source:HGNC Symbol;Acc:HGNC:13993]
SGCB	ENSG00000163069	0.6735	5.85777e-05	sarcoglycan beta [Source:HGNC Symbol;Acc:HGNC:10806]
PGRMC1	ENSG00000101856	0.97211	5.86899e-05	progesterone receptor membrane component 1 [Source:HGNC Symbol;Acc:HGNC:16090]
PRSS23	ENSG00000150687	1.24329	5.9234e-05	serine protease 23 [Source:HGNC Symbol;Acc:HGNC:14370]
SLC35G1	ENSG00000176273	1.01054	5.9234e-05	solute carrier family 35 member G1 [Source:HGNC Symbol;Acc:HGNC:26607]
ANKEF1	ENSG00000132623	1.2219	5.92677e-05	ankyrin repeat and EF-hand domain containing 1 [Source:HGNC Symbol;Acc:HGNC:15803]
PRKCH	ENSG00000027075	1.7082	5.96993e-05	protein kinase C eta [Source:HGNC Symbol;Acc:HGNC:9403]	Yes
CD24P4	ENSG00000185275	3.98708	6.01816e-05	CD24 molecule pseudogene 4 [Source:HGNC Symbol;Acc:HGNC:1649]	Yes
TGM5	ENSG00000104055	4.27086	6.10403e-05	transglutaminase 5 [Source:HGNC Symbol;Acc:HGNC:11781]	Yes
SSBP3P1	ENSG00000233225	-1.09465	6.3356e-05	SSBP3 pseudogene 1 [Source:HGNC Symbol;Acc:HGNC:54577]
CIPC	ENSG00000198894	0.428647	6.42628e-05	CLOCK interacting pacemaker [Source:HGNC Symbol;Acc:HGNC:20365]
COL16A1	ENSG00000084636	-1.36609	6.58628e-05	collagen type XVI alpha 1 chain [Source:HGNC Symbol;Acc:HGNC:2193]
OSGIN2	ENSG00000164823	0.553517	6.73447e-05	oxidative stress induced growth inhibitor family member 2 [Source:HGNC Symbol;Acc:HGNC:1355]
FTL	ENSG00000087086	1.19355	6.80763e-05	ferritin light chain [Source:HGNC Symbol;Acc:HGNC:3999]
TF	ENSG00000091513	2.34083	6.80763e-05	transferrin [Source:HGNC Symbol;Acc:HGNC:11740]	Yes
FABP3	ENSG00000121769	2.81411	6.80763e-05	fatty acid binding protein 3 [Source:HGNC Symbol;Acc:HGNC:3557]	Yes
PRKCZ-AS1	ENSG00000182873	-1.38959	6.87753e-05	PRKCZ antisense RNA 1 [Source:HGNC Symbol;Acc:HGNC:40477]
LEPROT	ENSG00000213625	0.738865	6.91025e-05	leptin receptor overlapping transcript [Source:HGNC Symbol;Acc:HGNC:29477]
RBCK1	ENSG00000125826	-0.680324	6.91372e-05	RANBP2-type and C3HC4-type zinc finger containing 1 [Source:HGNC Symbol;Acc:HGNC:15864]
RARRES1	ENSG00000118849	-2.83282	6.94761e-05	retinoic acid receptor responder 1 [Source:HGNC Symbol;Acc:HGNC:9867]	Yes
DCK	ENSG00000156136	0.75947	6.94761e-05	deoxycytidine kinase [Source:HGNC Symbol;Acc:HGNC:2704]
ADPGK	ENSG00000159322	0.632723	7.13881e-05	ADP dependent glucokinase [Source:HGNC Symbol;Acc:HGNC:25250]
FUT8-AS1	ENSG00000276116	-1.49683	7.23516e-05	FUT8 antisense RNA 1 [Source:HGNC Symbol;Acc:HGNC:44294]
NR4A2	ENSG00000153234	1.42489	7.3044e-05	nuclear receptor subfamily 4 group A member 2 [Source:HGNC Symbol;Acc:HGNC:7981]
STEAP4	ENSG00000127954	5.35992	7.42265e-05	STEAP4 metalloreductase [Source:HGNC Symbol;Acc:HGNC:21923]	Yes
THEMIS	ENSG00000172673	2.72059	7.42265e-05	thymocyte selection associated [Source:HGNC Symbol;Acc:HGNC:21569]	Yes
ARMCX1	ENSG00000126947	0.921098	7.56105e-05	armadillo repeat containing X-linked 1 [Source:HGNC Symbol;Acc:HGNC:18073]
MEST	ENSG00000106484	-2.29857	7.57407e-05	mesoderm specific transcript [Source:HGNC Symbol;Acc:HGNC:7028]	Yes
RBM47	ENSG00000163694	1.37065	7.57407e-05	RNA binding motif protein 47 [Source:HGNC Symbol;Acc:HGNC:30358]
AGRN	ENSG00000188157	-1.69728	7.87411e-05	agrin [Source:HGNC Symbol;Acc:HGNC:329]	Yes
DENND2B	ENSG00000166444	-1.87249	7.93145e-05	DENN domain containing 2B [Source:HGNC Symbol;Acc:HGNC:11350]	Yes
GALNT1	ENSG00000141429	1.48395	8.14753e-05	polypeptide N-acetylgalactosaminyltransferase 1 [Source:HGNC Symbol;Acc:HGNC:4123]
STAM	ENSG00000136738	0.623036	8.25252e-05	signal transducing adaptor molecule [Source:HGNC Symbol;Acc:HGNC:11357]
SPIN1	ENSG00000106723	0.493294	8.47165e-05	spindlin 1 [Source:HGNC Symbol;Acc:HGNC:11243]
PCDHAC2	ENSG00000243232	4.71007	8.74961e-05	protocadherin alpha subfamily C, 2 [Source:HGNC Symbol;Acc:HGNC:8677]	Yes
HEXB	ENSG00000049860	1.09176	9.01024e-05	hexosaminidase subunit beta [Source:HGNC Symbol;Acc:HGNC:4879]
CLMAT3	ENSG00000249035	-1.71987	9.01024e-05	colorectal liver metastasis associated transcript 3 [Source:HGNC Symbol;Acc:HGNC:52287]	Yes
PALMD	ENSG00000099260	2.22039	9.03647e-05	palmdelphin [Source:HGNC Symbol;Acc:HGNC:15846]	Yes
FAM27C	ENSG00000231527	-2.56116	9.03647e-05	family with sequence similarity 27 member C [Source:HGNC Symbol;Acc:HGNC:23668]	Yes
FAM89A	ENSG00000182118	1.46369	9.07349e-05	family with sequence similarity 89 member A [Source:HGNC Symbol;Acc:HGNC:25057]
SLC26A4	ENSG00000091137	-1.99638	9.20637e-05	solute carrier family 26 member 4 [Source:HGNC Symbol;Acc:HGNC:8818]	Yes
MICALL2	ENSG00000164877	-1.56666	9.25005e-05	MICAL like 2 [Source:HGNC Symbol;Acc:HGNC:29672]	Yes
SLC37A1	ENSG00000160190	1.46726	9.26838e-05	solute carrier family 37 member 1 [Source:HGNC Symbol;Acc:HGNC:11024]
KLHL7	ENSG00000122550	0.871161	9.33425e-05	kelch like family member 7 [Source:HGNC Symbol;Acc:HGNC:15646]
DSC2	ENSG00000134755	6.11938	9.36257e-05	desmocollin 2 [Source:HGNC Symbol;Acc:HGNC:3036]	Yes
ENSG00000263585	ENSG00000263585	-1.9633	9.53887e-05	novel transcript, antisense PYCR1	Yes
TWSG1	ENSG00000128791	0.886515	9.58334e-05	twisted gastrulation BMP signaling modulator 1 [Source:HGNC Symbol;Acc:HGNC:12429]
GRASLND	ENSG00000228203	2.95551	9.58334e-05	glycosaminoglycan regulatory associated long non-coding RNA [Source:HGNC Symbol;Acc:HGNC:30963]	Yes
VAMP3	ENSG00000049245	0.766091	9.59333e-05	vesicle associated membrane protein 3 [Source:HGNC Symbol;Acc:HGNC:12644]
ADAMTS5	ENSG00000154736	1.4825	9.75405e-05	ADAM metallopeptidase with thrombospondin type 1 motif 5 [Source:HGNC Symbol;Acc:HGNC:221]
AGL	ENSG00000162688	0.701157	9.81443e-05	amylo-alpha-1, 6-glucosidase, 4-alpha-glucanotransferase [Source:HGNC Symbol;Acc:HGNC:321]
GPNMB	ENSG00000136235	2.14671	9.8535e-05	glycoprotein nmb [Source:HGNC Symbol;Acc:HGNC:4462]	Yes
SERPINH1	ENSG00000149257	-0.867522	9.8535e-05	serpin family H member 1 [Source:HGNC Symbol;Acc:HGNC:1546]
BLOC1S6	ENSG00000104164	0.511679	9.87797e-05	biogenesis of lysosomal organelles complex 1 subunit 6 [Source:HGNC Symbol;Acc:HGNC:8549]
BAIAP2L1	ENSG00000006453	-1.05112	9.88049e-05	BAR/IMD domain containing adaptor protein 2 like 1 [Source:HGNC Symbol;Acc:HGNC:21649]
UBE2F	ENSG00000184182	0.623759	0.00010208	ubiquitin conjugating enzyme E2 F (putative) [Source:HGNC Symbol;Acc:HGNC:12480]
INMT	ENSG00000241644	3.34602	0.00010208	indolethylamine N-methyltransferase [Source:HGNC Symbol;Acc:HGNC:6069]	Yes
CASC15	ENSG00000272168	2.07362	0.00010208	cancer susceptibility 15 [Source:HGNC Symbol;Acc:HGNC:28245]	Yes
KRT18	ENSG00000111057	-4.42673	0.000103189	keratin 18 [Source:HGNC Symbol;Acc:HGNC:6430]	Yes
ITGA5	ENSG00000161638	-1.26178	0.000105229	integrin subunit alpha 5 [Source:HGNC Symbol;Acc:HGNC:6141]
CCDC102A	ENSG00000135736	-0.961398	0.000105568	coiled-coil domain containing 102A [Source:HGNC Symbol;Acc:HGNC:28097]
GJA1	ENSG00000152661	1.42463	0.000106856	gap junction protein alpha 1 [Source:HGNC Symbol;Acc:HGNC:4274]
SH3BP2	ENSG00000087266	-1.11803	0.000107578	SH3 domain binding protein 2 [Source:HGNC Symbol;Acc:HGNC:10825]
ENSG00000274818	ENSG00000274818	-1.54942	0.000107932	novel transcript	Yes
PLOD1	ENSG00000083444	-0.818761	0.00010835	procollagen-lysine,2-oxoglutarate 5-dioxygenase 1 [Source:HGNC Symbol;Acc:HGNC:9081]
GLA	ENSG00000102393	1.26269	0.000109353	galactosidase alpha [Source:HGNC Symbol;Acc:HGNC:4296]
B3GLCT	ENSG00000187676	0.656723	0.000110371	beta 3-glucosyltransferase [Source:HGNC Symbol;Acc:HGNC:20207]
C4B	ENSG00000224389	-2.11049	0.000110673	complement C4B (Chido blood group) [Source:HGNC Symbol;Acc:HGNC:1324]	Yes
KIAA1755	ENSG00000149633	-3.2362	0.000113166	KIAA1755 [Source:HGNC Symbol;Acc:HGNC:29372]	Yes
IER3IP1	ENSG00000134049	1.05587	0.000113322	immediate early response 3 interacting protein 1 [Source:HGNC Symbol;Acc:HGNC:18550]
EIF1	ENSG00000173812	-0.586949	0.000113959	eukaryotic translation initiation factor 1 [Source:HGNC Symbol;Acc:HGNC:3249]
MAPKAPK3	ENSG00000114738	0.603602	0.00011467	MAPK activated protein kinase 3 [Source:HGNC Symbol;Acc:HGNC:6888]
CACNB4	ENSG00000182389	2.63474	0.00011467	calcium voltage-gated channel auxiliary subunit beta 4 [Source:HGNC Symbol;Acc:HGNC:1404]	Yes
KRT8P3	ENSG00000254285	-4.92341	0.00011467	keratin 8 pseudogene 3 [Source:HGNC Symbol;Acc:HGNC:31056]	Yes
ERG	ENSG00000157554	2.49583	0.000114804	ETS transcription factor ERG [Source:HGNC Symbol;Acc:HGNC:3446]	Yes
FAM200A	ENSG00000221909	0.616482	0.000114903	family with sequence similarity 200 member A [Source:HGNC Symbol;Acc:HGNC:25401]
ARL6	ENSG00000113966	0.6325	0.00011635	ADP ribosylation factor like GTPase 6 [Source:HGNC Symbol;Acc:HGNC:13210]
STK33	ENSG00000130413	-1.85957	0.000118485	serine/threonine kinase 33 [Source:HGNC Symbol;Acc:HGNC:14568]	Yes
CTSS	ENSG00000163131	1.97128	0.000120686	cathepsin S [Source:HGNC Symbol;Acc:HGNC:2545]	Yes
FNDC5	ENSG00000160097	-1.11226	0.000122851	fibronectin type III domain containing 5 [Source:HGNC Symbol;Acc:HGNC:20240]
FGF7	ENSG00000140285	1.92385	0.000124767	fibroblast growth factor 7 [Source:HGNC Symbol;Acc:HGNC:3685]	Yes
VEGFA	ENSG00000112715	-1.83504	0.000125052	vascular endothelial growth factor A [Source:HGNC Symbol;Acc:HGNC:12680]	Yes
ITPR1	ENSG00000150995	1.12255	0.000125052	inositol 1,4,5-trisphosphate receptor type 1 [Source:HGNC Symbol;Acc:HGNC:6180]
ZNF883	ENSG00000228623	1.10968	0.000125052	zinc finger protein 883 [Source:HGNC Symbol;Acc:HGNC:27271]
GCNT4	ENSG00000176928	1.99078	0.000125157	glucosaminyl (N-acetyl) transferase 4 [Source:HGNC Symbol;Acc:HGNC:17973]	Yes
ENO4	ENSG00000188316	1.41864	0.00012532	enolase 4 [Source:HGNC Symbol;Acc:HGNC:31670]
ENSG00000259623	ENSG00000259623	0.727674	0.000128231	novel transcript, sense overlapping to KLHL11
PTPRE	ENSG00000132334	-1.86266	0.000129935	protein tyrosine phosphatase receptor type E [Source:HGNC Symbol;Acc:HGNC:9669]	Yes
SLC7A14	ENSG00000013293	-3.87586	0.00013127	solute carrier family 7 member 14 [Source:HGNC Symbol;Acc:HGNC:29326]	Yes
GLRB	ENSG00000109738	1.10208	0.000132051	glycine receptor beta [Source:HGNC Symbol;Acc:HGNC:4329]
STK32B	ENSG00000152953	2.19538	0.000132197	serine/threonine kinase 32B [Source:HGNC Symbol;Acc:HGNC:14217]	Yes
SYT7	ENSG00000011347	-2.82086	0.000132579	synaptotagmin 7 [Source:HGNC Symbol;Acc:HGNC:11514]	Yes
RNF187	ENSG00000168159	-0.738161	0.000132637	ring finger protein 187 [Source:HGNC Symbol;Acc:HGNC:27146]
LAMA1	ENSG00000101680	1.45974	0.000133548	laminin subunit alpha 1 [Source:HGNC Symbol;Acc:HGNC:6481]
TMED7	ENSG00000134970	1.0529	0.000133932	transmembrane p24 trafficking protein 7 [Source:HGNC Symbol;Acc:HGNC:24253]
TMEM168	ENSG00000146802	0.59044	0.000133932	transmembrane protein 168 [Source:HGNC Symbol;Acc:HGNC:25826]
ADRA2A	ENSG00000150594	2.68994	0.000133932	adrenoceptor alpha 2A [Source:HGNC Symbol;Acc:HGNC:281]	Yes
SPATA18	ENSG00000163071	0.677813	0.000134566	spermatogenesis associated 18 [Source:HGNC Symbol;Acc:HGNC:29579]
TTC19	ENSG00000011295	0.43663	0.000134637	tetratricopeptide repeat domain 19 [Source:HGNC Symbol;Acc:HGNC:26006]
CYBRD1	ENSG00000071967	1.38305	0.000135345	cytochrome b reductase 1 [Source:HGNC Symbol;Acc:HGNC:20797]
TEX41	ENSG00000226674	1.89637	0.000136094	testis expressed 41 [Source:HGNC Symbol;Acc:HGNC:48667]	Yes
TSPAN3	ENSG00000140391	0.729913	0.000137641	tetraspanin 3 [Source:HGNC Symbol;Acc:HGNC:17752]
P2RY1	ENSG00000169860	2.22333	0.000138256	purinergic receptor P2Y1 [Source:HGNC Symbol;Acc:HGNC:8539]	Yes
LRRC34	ENSG00000171757	1.20202	0.000138256	leucine rich repeat containing 34 [Source:HGNC Symbol;Acc:HGNC:28408]
SLC25A30	ENSG00000174032	0.700323	0.000138799	solute carrier family 25 member 30 [Source:HGNC Symbol;Acc:HGNC:27371]
C1orf112	ENSG00000000460	0.873911	0.000139036	chromosome 1 open reading frame 112 [Source:HGNC Symbol;Acc:HGNC:25565]
RGS9	ENSG00000108370	1.91828	0.000139036	regulator of G protein signaling 9 [Source:HGNC Symbol;Acc:HGNC:10004]	Yes
CORO1C	ENSG00000110880	1.00154	0.000139036	coronin 1C [Source:HGNC Symbol;Acc:HGNC:2254]
LOXL2	ENSG00000134013	-1.6984	0.000139036	lysyl oxidase like 2 [Source:HGNC Symbol;Acc:HGNC:6666]	Yes
STK17A	ENSG00000164543	0.845713	0.000139036	serine/threonine kinase 17a [Source:HGNC Symbol;Acc:HGNC:11395]
LHFPL6	ENSG00000183722	0.748264	0.000139036	LHFPL tetraspan subfamily member 6 [Source:HGNC Symbol;Acc:HGNC:6586]
FMOD	ENSG00000122176	3.06503	0.000139213	fibromodulin [Source:HGNC Symbol;Acc:HGNC:3774]	Yes
APELA	ENSG00000248329	6.01412	0.000139524	apelin receptor early endogenous ligand [Source:HGNC Symbol;Acc:HGNC:48925]	Yes
CRISPLD1	ENSG00000121005	1.4869	0.000140552	cysteine rich secretory protein LCCL domain containing 1 [Source:HGNC Symbol;Acc:HGNC:18206]
SDCBP	ENSG00000137575	1.21716	0.000141292	syndecan binding protein [Source:HGNC Symbol;Acc:HGNC:10662]
TNFRSF11B	ENSG00000164761	2.20819	0.000141399	TNF receptor superfamily member 11b [Source:HGNC Symbol;Acc:HGNC:11909]	Yes
HRK	ENSG00000135116	2.28985	0.000144092	harakiri, BCL2 interacting protein [Source:HGNC Symbol;Acc:HGNC:5185]	Yes
CPNE4	ENSG00000196353	5.66242	0.000146467	copine 4 [Source:HGNC Symbol;Acc:HGNC:2317]	Yes
STAT1	ENSG00000115415	1.15993	0.000148689	signal transducer and activator of transcription 1 [Source:HGNC Symbol;Acc:HGNC:11362]
TNFRSF25	ENSG00000215788	-1.66295	0.000148689	TNF receptor superfamily member 25 [Source:HGNC Symbol;Acc:HGNC:11910]	Yes
ENSG00000256894	ENSG00000256894	-1.72276	0.000148689	novel transcript, antisense to SSPN	Yes
STYK1	ENSG00000060140	2.48633	0.000149903	serine/threonine/tyrosine kinase 1 [Source:HGNC Symbol;Acc:HGNC:18889]	Yes
RERG	ENSG00000134533	3.76344	0.000150849	RAS like estrogen regulated growth inhibitor [Source:HGNC Symbol;Acc:HGNC:15980]	Yes
ZNF804A	ENSG00000170396	5.25007	0.00015131	zinc finger protein 804A [Source:HGNC Symbol;Acc:HGNC:21711]	Yes
FLRT2	ENSG00000185070	1.19489	0.00015131	fibronectin leucine rich transmembrane protein 2 [Source:HGNC Symbol;Acc:HGNC:3761]
TOR2A	ENSG00000160404	-0.52783	0.000152074	torsin family 2 member A [Source:HGNC Symbol;Acc:HGNC:11996]
OR2S2	ENSG00000278889	-4.2518	0.000157115	olfactory receptor family 2 subfamily S member 2 [Source:HGNC Symbol;Acc:HGNC:8276]	Yes
NT5E	ENSG00000135318	0.979822	0.000157546	5'-nucleotidase ecto [Source:HGNC Symbol;Acc:HGNC:8021]
ABCC3	ENSG00000108846	-1.84453	0.000159524	ATP binding cassette subfamily C member 3 [Source:HGNC Symbol;Acc:HGNC:54]	Yes
DHRS7B	ENSG00000109016	1.12621	0.000159524	dehydrogenase/reductase 7B [Source:HGNC Symbol;Acc:HGNC:24547]
IDH3A	ENSG00000166411	0.724849	0.000160759	isocitrate dehydrogenase (NAD(+)) 3 catalytic subunit alpha [Source:HGNC Symbol;Acc:HGNC:5384]
CAMKMT	ENSG00000143919	0.705801	0.000161492	calmodulin-lysine N-methyltransferase [Source:HGNC Symbol;Acc:HGNC:26276]
ZNF793	ENSG00000188227	-0.978759	0.000162985	zinc finger protein 793 [Source:HGNC Symbol;Acc:HGNC:33115]
JKAMP	ENSG00000050130	0.763679	0.000163076	JNK1/MAPK8 associated membrane protein [Source:HGNC Symbol;Acc:HGNC:20184]
SLC35B4	ENSG00000205060	0.676518	0.000163238	solute carrier family 35 member B4 [Source:HGNC Symbol;Acc:HGNC:20584]
ZNF365	ENSG00000138311	-1.002	0.000163859	zinc finger protein 365 [Source:HGNC Symbol;Acc:HGNC:18194]
CRISPLD2	ENSG00000103196	2.77803	0.000165865	cysteine rich secretory protein LCCL domain containing 2 [Source:HGNC Symbol;Acc:HGNC:25248]	Yes
PRKG2	ENSG00000138669	2.93798	0.000166504	protein kinase cGMP-dependent 2 [Source:HGNC Symbol;Acc:HGNC:9416]	Yes
CD46	ENSG00000117335	0.596853	0.000170607	CD46 molecule [Source:HGNC Symbol;Acc:HGNC:6953]
PAQR5	ENSG00000137819	2.36159	0.000170607	progestin and adipoQ receptor family member 5 [Source:HGNC Symbol;Acc:HGNC:29645]	Yes
TSNAX	ENSG00000116918	0.561064	0.000171162	translin associated factor X [Source:HGNC Symbol;Acc:HGNC:12380]
CYP1B1	ENSG00000138061	1.49674	0.000171643	cytochrome P450 family 1 subfamily B member 1 [Source:HGNC Symbol;Acc:HGNC:2597]
PRXL2A	ENSG00000122378	2.31077	0.000172742	peroxiredoxin like 2A [Source:HGNC Symbol;Acc:HGNC:28651]	Yes
ZBTB7C	ENSG00000184828	4.29107	0.000172742	zinc finger and BTB domain containing 7C [Source:HGNC Symbol;Acc:HGNC:31700]	Yes
TMEM50B	ENSG00000142188	0.60106	0.000172788	transmembrane protein 50B [Source:HGNC Symbol;Acc:HGNC:1280]
CCDC3	ENSG00000151468	2.14588	0.000173132	coiled-coil domain containing 3 [Source:HGNC Symbol;Acc:HGNC:23813]	Yes
MIR210HG	ENSG00000247095	-1.47307	0.000173179	MIR210 host gene [Source:HGNC Symbol;Acc:HGNC:39524]
MTM1	ENSG00000171100	0.591065	0.00017405	myotubularin 1 [Source:HGNC Symbol;Acc:HGNC:7448]
COL5A1	ENSG00000130635	-2.09178	0.00017559	collagen type V alpha 1 chain [Source:HGNC Symbol;Acc:HGNC:2209]	Yes
ENSG00000270823	ENSG00000270823	-2.99312	0.00017559	novel transcript, antisense to MEST	Yes
FOSB	ENSG00000125740	-1.52357	0.00017971	FosB proto-oncogene, AP-1 transcription factor subunit [Source:HGNC Symbol;Acc:HGNC:3797]	Yes
TPP1	ENSG00000166340	0.67369	0.000182351	tripeptidyl peptidase 1 [Source:HGNC Symbol;Acc:HGNC:2073]
PCDH9	ENSG00000184226	1.12507	0.000184284	protocadherin 9 [Source:HGNC Symbol;Acc:HGNC:8661]
GLI1	ENSG00000111087	-1.84816	0.00018608	GLI family zinc finger 1 [Source:HGNC Symbol;Acc:HGNC:4317]	Yes
LAPTM4B	ENSG00000104341	0.927927	0.000186082	lysosomal protein transmembrane 4 beta [Source:HGNC Symbol;Acc:HGNC:13646]
UBE2W	ENSG00000104343	0.736213	0.000186785	ubiquitin conjugating enzyme E2 W [Source:HGNC Symbol;Acc:HGNC:25616]
TMEM33	ENSG00000109133	0.731429	0.000187495	transmembrane protein 33 [Source:HGNC Symbol;Acc:HGNC:25541]
PIGB	ENSG00000069943	0.757957	0.00019201	phosphatidylinositol glycan anchor biosynthesis class B [Source:HGNC Symbol;Acc:HGNC:8959]
CERS5	ENSG00000139624	0.731016	0.0001937	ceramide synthase 5 [Source:HGNC Symbol;Acc:HGNC:23749]
KCNJ15	ENSG00000157551	2.70378	0.0001937	potassium inwardly rectifying channel subfamily J member 15 [Source:HGNC Symbol;Acc:HGNC:6261]	Yes
GDF7	ENSG00000143869	-3.11817	0.00019401	growth differentiation factor 7 [Source:HGNC Symbol;Acc:HGNC:4222]	Yes
TIAM2	ENSG00000146426	0.930112	0.000194116	TIAM Rac1 associated GEF 2 [Source:HGNC Symbol;Acc:HGNC:11806]
SLC35A5	ENSG00000138459	0.748042	0.000195433	solute carrier family 35 member A5 [Source:HGNC Symbol;Acc:HGNC:20792]
BBC3	ENSG00000105327	-1.05076	0.000199554	BCL2 binding component 3 [Source:HGNC Symbol;Acc:HGNC:17868]
RAET1G	ENSG00000203722	1.67724	0.000201625	retinoic acid early transcript 1G [Source:HGNC Symbol;Acc:HGNC:16795]	Yes
GPT2	ENSG00000166123	-0.946234	0.000202938	glutamic--pyruvic transaminase 2 [Source:HGNC Symbol;Acc:HGNC:18062]
SDHD	ENSG00000204370	0.999693	0.000202938	succinate dehydrogenase complex subunit D [Source:HGNC Symbol;Acc:HGNC:10683]
LINC01711	ENSG00000268941	-1.54099	0.000205976	long intergenic non-protein coding RNA 1711 [Source:HGNC Symbol;Acc:HGNC:28663]	Yes
GLIS2	ENSG00000126603	-1.42607	0.000207928	GLIS family zinc finger 2 [Source:HGNC Symbol;Acc:HGNC:29450]
MUC1	ENSG00000185499	-2.12037	0.000207928	mucin 1, cell surface associated [Source:HGNC Symbol;Acc:HGNC:7508]	Yes
FTCDNL1	ENSG00000226124	1.18367	0.000208635	formiminotransferase cyclodeaminase N-terminal like [Source:HGNC Symbol;Acc:HGNC:48661]
NDFIP1	ENSG00000131507	0.629383	0.000209071	Nedd4 family interacting protein 1 [Source:HGNC Symbol;Acc:HGNC:17592]
GREM1-AS1	ENSG00000259721	3.83243	0.000213077	GREM1 antisense RNA 1 [Source:HGNC Symbol;Acc:HGNC:55411]	Yes
PEAR1	ENSG00000187800	-2.00391	0.000213215	platelet endothelial aggregation receptor 1 [Source:HGNC Symbol;Acc:HGNC:33631]	Yes
FOXN2	ENSG00000170802	0.673422	0.000216141	forkhead box N2 [Source:HGNC Symbol;Acc:HGNC:5281]
SEMA7A	ENSG00000138623	-1.73441	0.000216431	semaphorin 7A (John Milton Hagen blood group) [Source:HGNC Symbol;Acc:HGNC:10741]	Yes
ENSG00000272114	ENSG00000272114	-2.11864	0.000217088	novel transcript, antisense to VEGFA	Yes
TBX5	ENSG00000089225	3.11531	0.000219005	T-box transcription factor 5 [Source:HGNC Symbol;Acc:HGNC:11604]	Yes
SBNO2	ENSG00000064932	-1.2093	0.000222075	strawberry notch homolog 2 [Source:HGNC Symbol;Acc:HGNC:29158]
EXOC2	ENSG00000112685	0.688338	0.000222075	exocyst complex component 2 [Source:HGNC Symbol;Acc:HGNC:24968]
LINC00900	ENSG00000246100	2.79688	0.000223934	long intergenic non-protein coding RNA 900 [Source:HGNC Symbol;Acc:HGNC:27444]	Yes
PPP1R9A	ENSG00000158528	3.82473	0.000225131	protein phosphatase 1 regulatory subunit 9A [Source:HGNC Symbol;Acc:HGNC:14946]	Yes
RAD1	ENSG00000113456	0.662522	0.000226709	RAD1 checkpoint DNA exonuclease [Source:HGNC Symbol;Acc:HGNC:9806]
IL17D	ENSG00000172458	1.2822	0.000226709	interleukin 17D [Source:HGNC Symbol;Acc:HGNC:5984]
RCAN2	ENSG00000172348	2.67466	0.000227371	regulator of calcineurin 2 [Source:HGNC Symbol;Acc:HGNC:3041]	Yes
GCNT3	ENSG00000140297	3.23042	0.000229032	glucosaminyl (N-acetyl) transferase 3, mucin type [Source:HGNC Symbol;Acc:HGNC:4205]	Yes
EPDR1	ENSG00000086289	1.5196	0.000231715	ependymin related 1 [Source:HGNC Symbol;Acc:HGNC:17572]	Yes
PDK3	ENSG00000067992	1.32401	0.000232518	pyruvate dehydrogenase kinase 3 [Source:HGNC Symbol;Acc:HGNC:8811]
LTBP2	ENSG00000119681	-1.50116	0.000232518	latent transforming growth factor beta binding protein 2 [Source:HGNC Symbol;Acc:HGNC:6715]	Yes
TOX2	ENSG00000124191	-2.17354	0.000232518	TOX high mobility group box family member 2 [Source:HGNC Symbol;Acc:HGNC:16095]	Yes
MFSD14A	ENSG00000156875	0.851749	0.000232745	major facilitator superfamily domain containing 14A [Source:HGNC Symbol;Acc:HGNC:23363]
FUT10	ENSG00000172728	0.826966	0.000233168	fucosyltransferase 10 [Source:HGNC Symbol;Acc:HGNC:19234]
LRRC4	ENSG00000128594	2.35155	0.00023508	leucine rich repeat containing 4 [Source:HGNC Symbol;Acc:HGNC:15586]	Yes
BCAM	ENSG00000187244	-1.79638	0.000237535	basal cell adhesion molecule (Lutheran blood group) [Source:HGNC Symbol;Acc:HGNC:6722]	Yes
RGL2	ENSG00000237441	-0.935008	0.00023944	ral guanine nucleotide dissociation stimulator like 2 [Source:HGNC Symbol;Acc:HGNC:9769]
ENSG00000250568	ENSG00000250568	-0.752323	0.00023944	poly(A) binding protein, cytoplasmic 1 (PABPC1) pseudogene
MYOZ2	ENSG00000172399	3.79179	0.00024082	myozenin 2 [Source:HGNC Symbol;Acc:HGNC:1330]	Yes
KIAA1217	ENSG00000120549	1.58052	0.000245824	KIAA1217 [Source:HGNC Symbol;Acc:HGNC:25428]	Yes
BTG3	ENSG00000154640	0.811875	0.000247202	BTG anti-proliferation factor 3 [Source:HGNC Symbol;Acc:HGNC:1132]
SIK1	ENSG00000142178	-1.5586	0.000247948	salt inducible kinase 1 [Source:HGNC Symbol;Acc:HGNC:11142]	Yes
CD82	ENSG00000085117	-1.09607	0.000250394	CD82 molecule [Source:HGNC Symbol;Acc:HGNC:6210]
OLFM2	ENSG00000105088	2.04642	0.000250394	olfactomedin 2 [Source:HGNC Symbol;Acc:HGNC:17189]	Yes
PENK	ENSG00000181195	4.03658	0.000250394	proenkephalin [Source:HGNC Symbol;Acc:HGNC:8831]	Yes
DHRS7	ENSG00000100612	0.998561	0.000253804	dehydrogenase/reductase 7 [Source:HGNC Symbol;Acc:HGNC:21524]
SMIM14	ENSG00000163683	0.405542	0.00025397	small integral membrane protein 14 [Source:HGNC Symbol;Acc:HGNC:27321]
ACOT4	ENSG00000177465	1.3361	0.00025673	acyl-CoA thioesterase 4 [Source:HGNC Symbol;Acc:HGNC:19748]
PODNL1	ENSG00000132000	-1.2281	0.000259592	podocan like 1 [Source:HGNC Symbol;Acc:HGNC:26275]
PHACTR1	ENSG00000112137	2.04485	0.000261472	phosphatase and actin regulator 1 [Source:HGNC Symbol;Acc:HGNC:20990]	Yes
NOG	ENSG00000183691	2.95146	0.000264918	noggin [Source:HGNC Symbol;Acc:HGNC:7866]	Yes
CRYM	ENSG00000103316	2.64093	0.000266842	crystallin mu [Source:HGNC Symbol;Acc:HGNC:2418]	Yes
PLEKHG5	ENSG00000171680	-1.37073	0.000270864	pleckstrin homology and RhoGEF domain containing G5 [Source:HGNC Symbol;Acc:HGNC:29105]
ENSG00000133808	ENSG00000133808	-2.25281	0.000272526	NA	Yes
NAT14	ENSG00000090971	-0.596636	0.000272864	N-acetyltransferase 14 (putative) [Source:HGNC Symbol;Acc:HGNC:28918]
CPNE3	ENSG00000085719	0.692085	0.000282978	copine 3 [Source:HGNC Symbol;Acc:HGNC:2316]
NNAT	ENSG00000053438	2.24288	0.000284158	neuronatin [Source:HGNC Symbol;Acc:HGNC:7860]	Yes
TMX2	ENSG00000213593	0.806037	0.000284158	thioredoxin related transmembrane protein 2 [Source:HGNC Symbol;Acc:HGNC:30739]
B3GALT5	ENSG00000183778	-2.0521	0.00028522	beta-1,3-galactosyltransferase 5 [Source:HGNC Symbol;Acc:HGNC:920]	Yes
ZNF433	ENSG00000197647	0.786629	0.000287936	zinc finger protein 433 [Source:HGNC Symbol;Acc:HGNC:20811]
EGR3	ENSG00000179388	-2.01134	0.000291069	early growth response 3 [Source:HGNC Symbol;Acc:HGNC:3240]	Yes
CILP2	ENSG00000160161	-3.0502	0.00029708	cartilage intermediate layer protein 2 [Source:HGNC Symbol;Acc:HGNC:24213]	Yes
SC5D	ENSG00000109929	1.17174	0.000302869	sterol-C5-desaturase [Source:HGNC Symbol;Acc:HGNC:10547]
BHMT2	ENSG00000132840	1.89793	0.000305061	betaine--homocysteine S-methyltransferase 2 [Source:HGNC Symbol;Acc:HGNC:1048]	Yes
OGT	ENSG00000147162	-0.939481	0.000305061	O-linked N-acetylglucosamine (GlcNAc) transferase [Source:HGNC Symbol;Acc:HGNC:8127]
RAB18	ENSG00000099246	0.63292	0.000306078	RAB18, member RAS oncogene family [Source:HGNC Symbol;Acc:HGNC:14244]
MAP7	ENSG00000135525	1.04499	0.000306078	microtubule associated protein 7 [Source:HGNC Symbol;Acc:HGNC:6869]
JUNB	ENSG00000171223	-0.927062	0.000307044	JunB proto-oncogene, AP-1 transcription factor subunit [Source:HGNC Symbol;Acc:HGNC:6205]
PARVG	ENSG00000138964	5.55503	0.000312306	parvin gamma [Source:HGNC Symbol;Acc:HGNC:14654]	Yes
SMPDL3A	ENSG00000172594	0.925154	0.000313664	sphingomyelin phosphodiesterase acid like 3A [Source:HGNC Symbol;Acc:HGNC:17389]
PTENP1	ENSG00000237984	-0.679202	0.000313664	phosphatase and tensin homolog pseudogene 1 [Source:HGNC Symbol;Acc:HGNC:9589]
CNTNAP3B	ENSG00000154529	-3.11633	0.000315919	contactin associated protein family member 3B [Source:HGNC Symbol;Acc:HGNC:32035]	Yes
TMEM192	ENSG00000170088	0.93435	0.000315979	transmembrane protein 192 [Source:HGNC Symbol;Acc:HGNC:26775]
CAB39L	ENSG00000102547	1.31321	0.000317933	calcium binding protein 39 like [Source:HGNC Symbol;Acc:HGNC:20290]
LOXL1	ENSG00000129038	-1.38206	0.000322363	lysyl oxidase like 1 [Source:HGNC Symbol;Acc:HGNC:6665]
PITPNC1	ENSG00000154217	1.34145	0.000323196	phosphatidylinositol transfer protein cytoplasmic 1 [Source:HGNC Symbol;Acc:HGNC:21045]
POLD4	ENSG00000175482	-0.748836	0.000330981	DNA polymerase delta 4, accessory subunit [Source:HGNC Symbol;Acc:HGNC:14106]
SPARC	ENSG00000113140	-1.08301	0.000331567	secreted protein acidic and cysteine rich [Source:HGNC Symbol;Acc:HGNC:11219]
CLCC1	ENSG00000121940	0.4313	0.000334508	chloride channel CLIC like 1 [Source:HGNC Symbol;Acc:HGNC:29675]
GALNT11	ENSG00000178234	0.627894	0.000334589	polypeptide N-acetylgalactosaminyltransferase 11 [Source:HGNC Symbol;Acc:HGNC:19875]
KCNK1	ENSG00000135750	1.12366	0.000334709	potassium two pore domain channel subfamily K member 1 [Source:HGNC Symbol;Acc:HGNC:6272]
ENSG00000274414	ENSG00000274414	-1.70426	0.000334709	novel transcript	Yes
CCND2	ENSG00000118971	2.36289	0.00033646	cyclin D2 [Source:HGNC Symbol;Acc:HGNC:1583]	Yes
CHL1	ENSG00000134121	5.01323	0.000341853	cell adhesion molecule L1 like [Source:HGNC Symbol;Acc:HGNC:1939]	Yes
CNKSR3	ENSG00000153721	0.995427	0.000343389	CNKSR family member 3 [Source:HGNC Symbol;Acc:HGNC:23034]
SCG5	ENSG00000166922	2.35847	0.000343859	secretogranin V [Source:HGNC Symbol;Acc:HGNC:10816]	Yes
ISLR	ENSG00000129009	-2.34572	0.000346935	immunoglobulin superfamily containing leucine rich repeat [Source:HGNC Symbol;Acc:HGNC:6133]	Yes
CD59	ENSG00000085063	1.24585	0.000349906	CD59 molecule (CD59 blood group) [Source:HGNC Symbol;Acc:HGNC:1689]
ATP6V1G1	ENSG00000136888	1.07679	0.000352765	ATPase H+ transporting V1 subunit G1 [Source:HGNC Symbol;Acc:HGNC:864]
ENSG00000259940	ENSG00000259940	-1.54029	0.000352765	novel transcript, antisense to JMJD5	Yes
PEBP1	ENSG00000089220	0.756389	0.000353296	phosphatidylethanolamine binding protein 1 [Source:HGNC Symbol;Acc:HGNC:8630]
B3GALNT1	ENSG00000169255	0.987624	0.000353535	beta-1,3-N-acetylgalactosaminyltransferase 1 (globoside blood group) [Source:HGNC Symbol;Acc:HGNC:918]
KIF26B	ENSG00000162849	-1.20597	0.000355366	kinesin family member 26B [Source:HGNC Symbol;Acc:HGNC:25484]
SLC1A2	ENSG00000110436	3.0653	0.000360766	solute carrier family 1 member 2 [Source:HGNC Symbol;Acc:HGNC:10940]	Yes
CYP20A1	ENSG00000119004	0.731326	0.000362924	cytochrome P450 family 20 subfamily A member 1 [Source:HGNC Symbol;Acc:HGNC:20576]
COMMD7	ENSG00000149600	0.736288	0.000366777	COMM domain containing 7 [Source:HGNC Symbol;Acc:HGNC:16223]
MUC19	ENSG00000205592	-2.01824	0.000366777	mucin 19, oligomeric [Source:HGNC Symbol;Acc:HGNC:14362]	Yes
ADCY2	ENSG00000078295	3.19996	0.000372531	adenylate cyclase 2 [Source:HGNC Symbol;Acc:HGNC:233]	Yes
RUBCNL	ENSG00000102445	2.78307	0.00037972	rubicon like autophagy enhancer [Source:HGNC Symbol;Acc:HGNC:20420]	Yes
RCN3	ENSG00000142552	-0.761437	0.000381423	reticulocalbin 3 [Source:HGNC Symbol;Acc:HGNC:21145]
LINC00963	ENSG00000204054	-0.704284	0.000383355	long intergenic non-protein coding RNA 963 [Source:HGNC Symbol;Acc:HGNC:48716]
TDRP	ENSG00000180190	1.34271	0.000385952	testis development related protein [Source:HGNC Symbol;Acc:HGNC:26951]
GHR	ENSG00000112964	0.645803	0.000393282	growth hormone receptor [Source:HGNC Symbol;Acc:HGNC:4263]
TCEAL1	ENSG00000172465	0.866367	0.000399635	transcription elongation factor A like 1 [Source:HGNC Symbol;Acc:HGNC:11616]
HSD11B1	ENSG00000117594	4.0978	0.000401518	hydroxysteroid 11-beta dehydrogenase 1 [Source:HGNC Symbol;Acc:HGNC:5208]	Yes
CYP51A1P1	ENSG00000241095	0.936419	0.000403245	cytochrome P450 family 51 subfamily A member 1 pseudogene 1 [Source:HGNC Symbol;Acc:HGNC:20245]
P3H4	ENSG00000141696	-0.690627	0.000405506	prolyl 3-hydroxylase family member 4 (inactive) [Source:HGNC Symbol;Acc:HGNC:16946]
ATP6V1C1	ENSG00000155097	0.787473	0.00041492	ATPase H+ transporting V1 subunit C1 [Source:HGNC Symbol;Acc:HGNC:856]
SORCS2	ENSG00000184985	-3.04483	0.00041492	sortilin related VPS10 domain containing receptor 2 [Source:HGNC Symbol;Acc:HGNC:16698]	Yes
SCOC	ENSG00000153130	0.93714	0.000414923	short coiled-coil protein [Source:HGNC Symbol;Acc:HGNC:20335]
PLEKHA7	ENSG00000166689	2.36044	0.000417439	pleckstrin homology domain containing A7 [Source:HGNC Symbol;Acc:HGNC:27049]	Yes
RCN2	ENSG00000117906	0.70222	0.000419178	reticulocalbin 2 [Source:HGNC Symbol;Acc:HGNC:9935]
THBS3-AS1	ENSG00000231064	-1.357	0.000422432	THBS3 antisense RNA 1 [Source:HGNC Symbol;Acc:HGNC:40582]
TMEM9B-AS1	ENSG00000254860	-1.40089	0.000422432	TMEM9B antisense RNA 1 [Source:HGNC Symbol;Acc:HGNC:19230]
ENSG00000259768	ENSG00000259768	-0.935286	0.000422432	novel transcript, antisense to ZFHX3
CCNY	ENSG00000108100	-0.826073	0.000426856	cyclin Y [Source:HGNC Symbol;Acc:HGNC:23354]
AKR1C1	ENSG00000187134	2.89727	0.000426856	aldo-keto reductase family 1 member C1 [Source:HGNC Symbol;Acc:HGNC:384]	Yes
TDP2	ENSG00000111802	0.705629	0.000429822	tyrosyl-DNA phosphodiesterase 2 [Source:HGNC Symbol;Acc:HGNC:17768]
TMEM128	ENSG00000132406	0.649773	0.000431789	transmembrane protein 128 [Source:HGNC Symbol;Acc:HGNC:28201]
TRAF3IP2	ENSG00000056972	1.07682	0.000442564	TRAF3 interacting protein 2 [Source:HGNC Symbol;Acc:HGNC:1343]
RSRC1	ENSG00000174891	0.966668	0.000447459	arginine and serine rich coiled-coil 1 [Source:HGNC Symbol;Acc:HGNC:24152]
EIF3FP3	ENSG00000233426	-0.612768	0.000448469	eukaryotic translation initiation factor 3 subunit F pseudogene 3 [Source:HGNC Symbol;Acc:HGNC:37625]
LMBRD1	ENSG00000168216	0.866673	0.000455986	LMBR1 domain containing 1 [Source:HGNC Symbol;Acc:HGNC:23038]
NCEH1	ENSG00000144959	1.50877	0.000456465	neutral cholesterol ester hydrolase 1 [Source:HGNC Symbol;Acc:HGNC:29260]	Yes
NID2	ENSG00000087303	-1.69423	0.000461249	nidogen 2 [Source:HGNC Symbol;Acc:HGNC:13389]	Yes
DIS3L	ENSG00000166938	0.648225	0.000464557	DIS3 like exosome 3'-5' exoribonuclease [Source:HGNC Symbol;Acc:HGNC:28698]
UBE2E1	ENSG00000170142	0.813284	0.000466778	ubiquitin conjugating enzyme E2 E1 [Source:HGNC Symbol;Acc:HGNC:12477]
SNRNP27	ENSG00000124380	0.694803	0.000467546	small nuclear ribonucleoprotein U4/U6.U5 subunit 27 [Source:HGNC Symbol;Acc:HGNC:30240]
TGFB1	ENSG00000105329	-1.24756	0.000470576	transforming growth factor beta 1 [Source:HGNC Symbol;Acc:HGNC:11766]
GMFB	ENSG00000197045	0.945562	0.000470576	glia maturation factor beta [Source:HGNC Symbol;Acc:HGNC:4373]
HNRNPH2	ENSG00000126945	0.764893	0.000472123	heterogeneous nuclear ribonucleoprotein H2 [Source:HGNC Symbol;Acc:HGNC:5042]
CCR10	ENSG00000184451	-1.36936	0.000473745	C-C motif chemokine receptor 10 [Source:HGNC Symbol;Acc:HGNC:4474]
GDF6	ENSG00000156466	2.47394	0.000475808	growth differentiation factor 6 [Source:HGNC Symbol;Acc:HGNC:4221]	Yes
SELENOT	ENSG00000198843	0.911985	0.000476046	selenoprotein T [Source:HGNC Symbol;Acc:HGNC:18136]
ATRNL1	ENSG00000107518	3.05671	0.000479444	attractin like 1 [Source:HGNC Symbol;Acc:HGNC:29063]	Yes
SMIM43	ENSG00000164112	2.39724	0.000484003	small integral membrane protein 43 [Source:HGNC Symbol;Acc:HGNC:55077]	Yes
ENSG00000253163	ENSG00000253163	3.15496	0.000489566	novel transcript	Yes
RESF1	ENSG00000174718	-0.956603	0.000489981	retroelement silencing factor 1 [Source:HGNC Symbol;Acc:HGNC:25559]
ABHD12	ENSG00000100997	0.937328	0.000490798	abhydrolase domain containing 12, lysophospholipase [Source:HGNC Symbol;Acc:HGNC:15868]
ENSG00000255366	ENSG00000255366	1.88881	0.00049265	novel transcript	Yes
ENSG00000227678	ENSG00000227678	-2.74317	0.000492945	novel transcript, antisense to L3MBTL3	Yes
PERP	ENSG00000112378	1.2327	0.000495203	p53 apoptosis effector related to PMP22 [Source:HGNC Symbol;Acc:HGNC:17637]
AZIN1	ENSG00000155096	0.573731	0.000501712	antizyme inhibitor 1 [Source:HGNC Symbol;Acc:HGNC:16432]
WNT11	ENSG00000085741	-2.20902	0.000501885	Wnt family member 11 [Source:HGNC Symbol;Acc:HGNC:12776]	Yes
CCDC68	ENSG00000166510	1.53357	0.00050703	coiled-coil domain containing 68 [Source:HGNC Symbol;Acc:HGNC:24350]	Yes
MKKS	ENSG00000125863	0.612693	0.000512517	MKKS centrosomal shuttling protein [Source:HGNC Symbol;Acc:HGNC:7108]
HPD	ENSG00000158104	3.21437	0.000520589	4-hydroxyphenylpyruvate dioxygenase [Source:HGNC Symbol;Acc:HGNC:5147]	Yes
RANBP17	ENSG00000204764	1.85622	0.000523616	RAN binding protein 17 [Source:HGNC Symbol;Acc:HGNC:14428]	Yes
ENSG00000283178	ENSG00000283178	-2.62794	0.000524703	chromosome X open reading frame 49 (CXorf49) pseudogene	Yes
FXYD5	ENSG00000089327	-0.79991	0.000530483	FXYD domain containing ion transport regulator 5 [Source:HGNC Symbol;Acc:HGNC:4029]
LRIG1	ENSG00000144749	-1.30578	0.000541519	leucine rich repeats and immunoglobulin like domains 1 [Source:HGNC Symbol;Acc:HGNC:17360]
FBXL13	ENSG00000161040	-1.15933	0.000541519	F-box and leucine rich repeat protein 13 [Source:HGNC Symbol;Acc:HGNC:21658]
HSD17B11	ENSG00000198189	0.986742	0.000544801	hydroxysteroid 17-beta dehydrogenase 11 [Source:HGNC Symbol;Acc:HGNC:22960]
RASGEF1B	ENSG00000138670	3.00279	0.000547611	RasGEF domain family member 1B [Source:HGNC Symbol;Acc:HGNC:24881]	Yes
DHRS3	ENSG00000162496	-2.16808	0.000549478	dehydrogenase/reductase 3 [Source:HGNC Symbol;Acc:HGNC:17693]	Yes
SEMA3E	ENSG00000170381	4.8613	0.000549478	semaphorin 3E [Source:HGNC Symbol;Acc:HGNC:10727]	Yes
CLN5	ENSG00000102805	0.712872	0.000554299	CLN5 intracellular trafficking protein [Source:HGNC Symbol;Acc:HGNC:2076]
HSDL1	ENSG00000103160	0.450055	0.000555624	hydroxysteroid dehydrogenase like 1 [Source:HGNC Symbol;Acc:HGNC:16475]
CCL7	ENSG00000108688	-2.54066	0.000555624	C-C motif chemokine ligand 7 [Source:HGNC Symbol;Acc:HGNC:10634]	Yes
KRT18P11	ENSG00000215089	-5.12227	0.00055803	keratin 18 pseudogene 11 [Source:HGNC Symbol;Acc:HGNC:6431]	Yes
ACKR3	ENSG00000144476	4.23429	0.00056232	atypical chemokine receptor 3 [Source:HGNC Symbol;Acc:HGNC:23692]	Yes
DIPK2A	ENSG00000181744	1.22872	0.00056599	divergent protein kinase domain 2A [Source:HGNC Symbol;Acc:HGNC:28490]
TIMP1	ENSG00000102265	1.08206	0.000568594	TIMP metallopeptidase inhibitor 1 [Source:HGNC Symbol;Acc:HGNC:11820]
VSTM4	ENSG00000165633	0.935859	0.000568594	V-set and transmembrane domain containing 4 [Source:HGNC Symbol;Acc:HGNC:26470]
HHIP	ENSG00000164161	-2.33504	0.000571033	hedgehog interacting protein [Source:HGNC Symbol;Acc:HGNC:14866]	Yes
DOK4	ENSG00000125170	-0.962585	0.000571567	docking protein 4 [Source:HGNC Symbol;Acc:HGNC:19868]
ENSG00000260276	ENSG00000260276	-1.21118	0.000574364	NA
PTGER4	ENSG00000171522	1.63282	0.000575662	prostaglandin E receptor 4 [Source:HGNC Symbol;Acc:HGNC:9596]	Yes
TBXAS1	ENSG00000059377	-1.19232	0.00057687	thromboxane A synthase 1 [Source:HGNC Symbol;Acc:HGNC:11609]
PABPC1	ENSG00000070756	-0.655105	0.00057687	poly(A) binding protein cytoplasmic 1 [Source:HGNC Symbol;Acc:HGNC:8554]
C1orf21	ENSG00000116667	1.08107	0.00057687	chromosome 1 open reading frame 21 [Source:HGNC Symbol;Acc:HGNC:15494]
PAM	ENSG00000145730	0.9596	0.00057687	peptidylglycine alpha-amidating monooxygenase [Source:HGNC Symbol;Acc:HGNC:8596]
ADCY1	ENSG00000164742	1.82314	0.00057687	adenylate cyclase 1 [Source:HGNC Symbol;Acc:HGNC:232]	Yes
ZNF204P	ENSG00000204789	1.71941	0.00057687	zinc finger protein 204, pseudogene [Source:HGNC Symbol;Acc:HGNC:12995]	Yes
LINC00475	ENSG00000225511	-0.964841	0.000577885	long intergenic non-protein coding RNA 475 [Source:HGNC Symbol;Acc:HGNC:23569]
TMEM50A	ENSG00000183726	0.991646	0.000590101	transmembrane protein 50A [Source:HGNC Symbol;Acc:HGNC:30590]
ACAT1	ENSG00000075239	1.02382	0.000595314	acetyl-CoA acetyltransferase 1 [Source:HGNC Symbol;Acc:HGNC:93]
KRT8P46	ENSG00000248971	-1.50105	0.000595401	keratin 8 pseudogene 46 [Source:HGNC Symbol;Acc:HGNC:39880]	Yes
ENSG00000258168	ENSG00000258168	2.5342	0.000596225	novel transcript, antisense to PTPRB	Yes
NRP1	ENSG00000099250	-1.02327	0.000596754	neuropilin 1 [Source:HGNC Symbol;Acc:HGNC:8004]
MICAL1	ENSG00000135596	-0.924345	0.000598424	microtubule associated monooxygenase, calponin and LIM domain containing 1 [Source:HGNC Symbol;Acc:HGNC:20619]
MAP3K14	ENSG00000006062	-0.949946	0.000598738	mitogen-activated protein kinase kinase kinase 14 [Source:HGNC Symbol;Acc:HGNC:6853]
ADAM22	ENSG00000008277	1.24869	0.000598738	ADAM metallopeptidase domain 22 [Source:HGNC Symbol;Acc:HGNC:201]
RAB9A	ENSG00000123595	0.994137	0.000598738	RAB9A, member RAS oncogene family [Source:HGNC Symbol;Acc:HGNC:9792]
GPR39	ENSG00000183840	-1.42063	0.000603295	G protein-coupled receptor 39 [Source:HGNC Symbol;Acc:HGNC:4496]
EMC3	ENSG00000125037	1.05816	0.000612261	ER membrane protein complex subunit 3 [Source:HGNC Symbol;Acc:HGNC:23999]
CD24	ENSG00000272398	3.78859	0.000622471	CD24 molecule [Source:HGNC Symbol;Acc:HGNC:1645]	Yes
DYNC1LI1	ENSG00000144635	0.672989	0.000631689	dynein cytoplasmic 1 light intermediate chain 1 [Source:HGNC Symbol;Acc:HGNC:18745]
TET3	ENSG00000187605	-1.63273	0.000632098	tet methylcytosine dioxygenase 3 [Source:HGNC Symbol;Acc:HGNC:28313]	Yes
ALS2	ENSG00000003393	0.517468	0.000635927	alsin Rho guanine nucleotide exchange factor ALS2 [Source:HGNC Symbol;Acc:HGNC:443]
TNFRSF1A	ENSG00000067182	-0.445667	0.000637363	TNF receptor superfamily member 1A [Source:HGNC Symbol;Acc:HGNC:11916]
LRRK2	ENSG00000188906	1.97443	0.000641437	leucine rich repeat kinase 2 [Source:HGNC Symbol;Acc:HGNC:18618]	Yes
LMNTD2	ENSG00000185522	-1.78041	0.000643762	lamin tail domain containing 2 [Source:HGNC Symbol;Acc:HGNC:28561]	Yes
ARFIP1	ENSG00000164144	0.690178	0.000646793	ADP ribosylation factor interacting protein 1 [Source:HGNC Symbol;Acc:HGNC:21496]
HADH	ENSG00000138796	0.732146	0.000649904	hydroxyacyl-CoA dehydrogenase [Source:HGNC Symbol;Acc:HGNC:4799]
MANCR	ENSG00000231298	-2.28516	0.000656463	mitotically associated long non coding RNA [Source:HGNC Symbol;Acc:HGNC:44678]	Yes
DOK1	ENSG00000115325	0.894728	0.000662417	docking protein 1 [Source:HGNC Symbol;Acc:HGNC:2990]
FAM156A	ENSG00000268350	-0.798047	0.000663945	family with sequence similarity 156 member A [Source:HGNC Symbol;Acc:HGNC:30114]
UBTD1	ENSG00000165886	-0.535433	0.000667807	ubiquitin domain containing 1 [Source:HGNC Symbol;Acc:HGNC:25683]
PODN	ENSG00000174348	1.87962	0.000670996	podocan [Source:HGNC Symbol;Acc:HGNC:23174]	Yes
NPW	ENSG00000183971	-1.51193	0.000679816	neuropeptide W [Source:HGNC Symbol;Acc:HGNC:30509]	Yes
IGFBP6	ENSG00000167779	-1.32282	0.000681761	insulin like growth factor binding protein 6 [Source:HGNC Symbol;Acc:HGNC:5475]
KITLG	ENSG00000049130	1.04709	0.00068266	KIT ligand [Source:HGNC Symbol;Acc:HGNC:6343]
PIK3R3	ENSG00000117461	0.952882	0.00068266	phosphoinositide-3-kinase regulatory subunit 3 [Source:HGNC Symbol;Acc:HGNC:8981]
LRRC37A15P	ENSG00000230069	-1.631	0.00068692	leucine rich repeat containing 37 member A15, pseudogene [Source:HGNC Symbol;Acc:HGNC:43819]	Yes
CYP19A1	ENSG00000137869	2.81544	0.000688454	cytochrome P450 family 19 subfamily A member 1 [Source:HGNC Symbol;Acc:HGNC:2594]	Yes
ZEB1	ENSG00000148516	-1.02964	0.000688454	zinc finger E-box binding homeobox 1 [Source:HGNC Symbol;Acc:HGNC:11642]
MYRIP	ENSG00000170011	4.25619	0.000688454	myosin VIIA and Rab interacting protein [Source:HGNC Symbol;Acc:HGNC:19156]	Yes
GPRC5B	ENSG00000167191	-3.1518	0.000692779	G protein-coupled receptor class C group 5 member B [Source:HGNC Symbol;Acc:HGNC:13308]	Yes
HRAT17	ENSG00000234520	1.92518	0.000693449	heart tissue-associated transcript 17 [Source:NCBI gene (formerly Entrezgene);Acc:101928036]	Yes
ZNF799	ENSG00000196466	0.693955	0.00070947	zinc finger protein 799 [Source:HGNC Symbol;Acc:HGNC:28071]
HIGD1A	ENSG00000181061	1.12809	0.000709504	HIG1 hypoxia inducible domain family member 1A [Source:HGNC Symbol;Acc:HGNC:29527]
HMGN3	ENSG00000118418	0.7584	0.000713791	high mobility group nucleosomal binding domain 3 [Source:HGNC Symbol;Acc:HGNC:12312]
TNS1	ENSG00000079308	-1.4909	0.000715749	tensin 1 [Source:HGNC Symbol;Acc:HGNC:11973]
SSH3	ENSG00000172830	-0.510831	0.000715749	slingshot protein phosphatase 3 [Source:HGNC Symbol;Acc:HGNC:30581]
NPIPA9	ENSG00000233024	-1.61791	0.000715749	nuclear pore complex interacting protein family, member A9 [Source:HGNC Symbol;Acc:HGNC:41984]	Yes
CCDC80	ENSG00000091986	-0.769704	0.000722641	coiled-coil domain containing 80 [Source:HGNC Symbol;Acc:HGNC:30649]
CYB5R2	ENSG00000166394	1.91269	0.000723796	cytochrome b5 reductase 2 [Source:HGNC Symbol;Acc:HGNC:24376]	Yes
CACNG6	ENSG00000130433	-5.25686	0.000727003	calcium voltage-gated channel auxiliary subunit gamma 6 [Source:HGNC Symbol;Acc:HGNC:13625]	Yes
HSPA14	ENSG00000187522	0.574176	0.000732834	heat shock protein family A (Hsp70) member 14 [Source:HGNC Symbol;Acc:HGNC:29526]
HERPUD1	ENSG00000051108	-0.525683	0.00074276	homocysteine inducible ER protein with ubiquitin like domain 1 [Source:HGNC Symbol;Acc:HGNC:13744]
HNF4G	ENSG00000164749	2.14845	0.00074276	hepatocyte nuclear factor 4 gamma [Source:HGNC Symbol;Acc:HGNC:5026]	Yes
RGCC	ENSG00000102760	3.44153	0.000746661	regulator of cell cycle [Source:HGNC Symbol;Acc:HGNC:20369]	Yes
ANXA8	ENSG00000265190	-3.35659	0.000751058	annexin A8 [Source:HGNC Symbol;Acc:HGNC:546]	Yes
SLC39A6	ENSG00000141424	0.749697	0.00075255	solute carrier family 39 member 6 [Source:HGNC Symbol;Acc:HGNC:18607]
PTS	ENSG00000150787	0.821078	0.000756872	6-pyruvoyltetrahydropterin synthase [Source:HGNC Symbol;Acc:HGNC:9689]
MROH8	ENSG00000101353	0.870237	0.000758607	maestro heat like repeat family member 8 [Source:HGNC Symbol;Acc:HGNC:16125]
LINC01239	ENSG00000234840	-2.34649	0.000764776	long intergenic non-protein coding RNA 1239 [Source:HGNC Symbol;Acc:HGNC:49796]	Yes
IL17B	ENSG00000127743	-2.53319	0.000773361	interleukin 17B [Source:HGNC Symbol;Acc:HGNC:5982]	Yes
SLC49A4	ENSG00000138463	0.536983	0.000784373	solute carrier family 49 member 4 [Source:HGNC Symbol;Acc:HGNC:16628]
CRABP2	ENSG00000143320	-2.46093	0.000784373	cellular retinoic acid binding protein 2 [Source:HGNC Symbol;Acc:HGNC:2339]	Yes
ANKRD36C	ENSG00000174501	-0.926315	0.000785296	ankyrin repeat domain 36C [Source:HGNC Symbol;Acc:HGNC:32946]
MAML3	ENSG00000196782	-1.55317	0.000790146	mastermind like transcriptional coactivator 3 [Source:HGNC Symbol;Acc:HGNC:16272]	Yes
ZNF581	ENSG00000171425	-0.650098	0.000792845	zinc finger protein 581 [Source:HGNC Symbol;Acc:HGNC:25017]
MRPL42	ENSG00000198015	0.68452	0.000792845	mitochondrial ribosomal protein L42 [Source:HGNC Symbol;Acc:HGNC:14493]
ATP6V1B2	ENSG00000147416	0.723128	0.000793837	ATPase H+ transporting V1 subunit B2 [Source:HGNC Symbol;Acc:HGNC:854]
CD36	ENSG00000135218	3.12925	0.000794489	CD36 molecule [Source:HGNC Symbol;Acc:HGNC:1663]	Yes
CDADC1	ENSG00000102543	0.626764	0.000797388	cytidine and dCMP deaminase domain containing 1 [Source:HGNC Symbol;Acc:HGNC:20299]
MT-ATP6	ENSG00000198899	0.695096	0.000797388	mitochondrially encoded ATP synthase membrane subunit 6 [Source:HGNC Symbol;Acc:HGNC:7414]
GOLGA2P10	ENSG00000255769	-1.04275	0.000797388	GOLGA2 pseudogene 10 [Source:HGNC Symbol;Acc:HGNC:26229]
PRSS35	ENSG00000146250	1.70864	0.00079777	serine protease 35 [Source:HGNC Symbol;Acc:HGNC:21387]	Yes
CAT	ENSG00000121691	1.03871	0.000819418	catalase [Source:HGNC Symbol;Acc:HGNC:1516]
CMTM6	ENSG00000091317	0.561593	0.00082056	CKLF like MARVEL transmembrane domain containing 6 [Source:HGNC Symbol;Acc:HGNC:19177]
ZSWIM4	ENSG00000132003	-1.45182	0.000829681	zinc finger SWIM-type containing 4 [Source:HGNC Symbol;Acc:HGNC:25704]
ALG8	ENSG00000159063	0.865477	0.000829681	ALG8 alpha-1,3-glucosyltransferase [Source:HGNC Symbol;Acc:HGNC:23161]
TIAM1	ENSG00000156299	-1.23576	0.000833869	TIAM Rac1 associated GEF 1 [Source:HGNC Symbol;Acc:HGNC:11805]
ELMOD2	ENSG00000179387	0.638301	0.000833869	ELMO domain containing 2 [Source:HGNC Symbol;Acc:HGNC:28111]
DRP2	ENSG00000102385	-2.10299	0.000852315	dystrophin related protein 2 [Source:HGNC Symbol;Acc:HGNC:3032]	Yes
NAPA	ENSG00000105402	0.613869	0.000872541	NSF attachment protein alpha [Source:HGNC Symbol;Acc:HGNC:7641]
KRT79	ENSG00000185640	-3.18907	0.000872541	keratin 79 [Source:HGNC Symbol;Acc:HGNC:28930]	Yes
TRAPPC13	ENSG00000113597	0.373922	0.000879562	trafficking protein particle complex subunit 13 [Source:HGNC Symbol;Acc:HGNC:25828]
VASH1	ENSG00000071246	-1.35043	0.000892342	vasohibin 1 [Source:HGNC Symbol;Acc:HGNC:19964]
TMEM9B	ENSG00000175348	0.950007	0.000895	TMEM9 domain family member B [Source:HGNC Symbol;Acc:HGNC:1168]
SFRP4	ENSG00000106483	4.11932	0.000901134	secreted frizzled related protein 4 [Source:HGNC Symbol;Acc:HGNC:10778]	Yes
CEP20	ENSG00000133393	0.495298	0.000902373	centrosomal protein 20 [Source:HGNC Symbol;Acc:HGNC:26435]
ACBD5	ENSG00000107897	0.456366	0.000906506	acyl-CoA binding domain containing 5 [Source:HGNC Symbol;Acc:HGNC:23338]
PPP1R13B	ENSG00000088808	-1.16089	0.000906848	protein phosphatase 1 regulatory subunit 13B [Source:HGNC Symbol;Acc:HGNC:14950]
DOC2A	ENSG00000149927	-1.65914	0.000910225	double C2 domain alpha [Source:HGNC Symbol;Acc:HGNC:2985]	Yes
AFG1L	ENSG00000135537	0.761939	0.000915143	AFG1 like ATPase [Source:HGNC Symbol;Acc:HGNC:16411]
ENSG00000259605	ENSG00000259605	-1.66705	0.000915143	novel transcript, antisense to SIX5	Yes
OLFML1	ENSG00000183801	4.50651	0.000915327	olfactomedin like 1 [Source:HGNC Symbol;Acc:HGNC:24473]	Yes
CDHR3	ENSG00000128536	1.32576	0.000918916	cadherin related family member 3 [Source:HGNC Symbol;Acc:HGNC:26308]
NEFM	ENSG00000104722	4.90716	0.000919349	neurofilament medium chain [Source:HGNC Symbol;Acc:HGNC:7734]	Yes
TRPC6	ENSG00000137672	2.13406	0.000920684	transient receptor potential cation channel subfamily C member 6 [Source:HGNC Symbol;Acc:HGNC:12338]	Yes
EXPH5	ENSG00000110723	2.76662	0.00093356	exophilin 5 [Source:HGNC Symbol;Acc:HGNC:30578]	Yes
TMX3	ENSG00000166479	0.631546	0.000937329	thioredoxin related transmembrane protein 3 [Source:HGNC Symbol;Acc:HGNC:24718]
SLC16A6	ENSG00000108932	2.63642	0.000940442	solute carrier family 16 member 6 [Source:HGNC Symbol;Acc:HGNC:10927]	Yes
CYP27A1	ENSG00000135929	1.8938	0.000941507	cytochrome P450 family 27 subfamily A member 1 [Source:HGNC Symbol;Acc:HGNC:2605]	Yes
PABPC3	ENSG00000151846	-0.776463	0.000943249	poly(A) binding protein cytoplasmic 3 [Source:HGNC Symbol;Acc:HGNC:8556]
ENSG00000254680	ENSG00000254680	-2.24586	0.000944638	novel transcript	Yes
ENSG00000259370	ENSG00000259370	-3.17574	0.000947806	novel transcript, antisense to TLN2	Yes
ENSG00000280206	ENSG00000280206	-0.639071	0.000947806	novel transcript
LAMB1	ENSG00000091136	-1.09242	0.000952525	laminin subunit beta 1 [Source:HGNC Symbol;Acc:HGNC:6486]
IRF2BPL	ENSG00000119669	-1.38416	0.000954726	interferon regulatory factor 2 binding protein like [Source:HGNC Symbol;Acc:HGNC:14282]
DUOX1	ENSG00000137857	3.54586	0.00095493	dual oxidase 1 [Source:HGNC Symbol;Acc:HGNC:3062]	Yes
FTLP2	ENSG00000232368	1.25667	0.00095493	ferritin light chain pseudogene 2 [Source:HGNC Symbol;Acc:HGNC:4001]
SLC66A3	ENSG00000162976	1.14203	0.000963716	solute carrier family 66 member 3 [Source:HGNC Symbol;Acc:HGNC:28503]
RBP1	ENSG00000114115	-3.8315	0.000966462	retinol binding protein 1 [Source:HGNC Symbol;Acc:HGNC:9919]	Yes
NMNAT2	ENSG00000157064	-1.92549	0.000975698	nicotinamide nucleotide adenylyltransferase 2 [Source:HGNC Symbol;Acc:HGNC:16789]	Yes
PCDHB16	ENSG00000272674	1.62896	0.000979679	protocadherin beta 16 [Source:HGNC Symbol;Acc:HGNC:14546]	Yes
ZNF521	ENSG00000198795	2.62483	0.000984341	zinc finger protein 521 [Source:HGNC Symbol;Acc:HGNC:24605]	Yes
DSG3	ENSG00000134757	4.41678	0.000992053	desmoglein 3 [Source:HGNC Symbol;Acc:HGNC:3050]	Yes
SEC22C	ENSG00000093183	0.472224	0.000992562	SEC22 homolog C, vesicle trafficking protein [Source:HGNC Symbol;Acc:HGNC:16828]
SELENOK	ENSG00000113811	0.943447	0.000996095	selenoprotein K [Source:HGNC Symbol;Acc:HGNC:30394]
ADK	ENSG00000156110	1.01843	0.000998803	adenosine kinase [Source:HGNC Symbol;Acc:HGNC:257]
PCOLCE-AS1	ENSG00000224729	-1.46454	0.0010005	PCOLCE antisense RNA 1 [Source:HGNC Symbol;Acc:HGNC:40430]
PTPRQ	ENSG00000139304	-1.53851	0.0010024	protein tyrosine phosphatase receptor type Q [Source:HGNC Symbol;Acc:HGNC:9679]	Yes
CROCC	ENSG00000058453	-0.953538	0.00100288	ciliary rootlet coiled-coil, rootletin [Source:HGNC Symbol;Acc:HGNC:21299]
ZNF738	ENSG00000172687	0.714694	0.00100288	zinc finger protein 738 [Source:HGNC Symbol;Acc:HGNC:32469]
TCF3	ENSG00000071564	-0.944706	0.00100504	transcription factor 3 [Source:HGNC Symbol;Acc:HGNC:11633]
ZFP64	ENSG00000020256	-0.479385	0.00101655	ZFP64 zinc finger protein [Source:HGNC Symbol;Acc:HGNC:15940]
RELB	ENSG00000104856	-0.933295	0.00101928	RELB proto-oncogene, NF-kB subunit [Source:HGNC Symbol;Acc:HGNC:9956]
C1QTNF7	ENSG00000163145	3.54571	0.00101977	C1q and TNF related 7 [Source:HGNC Symbol;Acc:HGNC:14342]	Yes
SHISAL1	ENSG00000138944	1.62849	0.00102679	shisa like 1 [Source:HGNC Symbol;Acc:HGNC:29335]	Yes
ZNF711	ENSG00000147180	-1.05852	0.00103153	zinc finger protein 711 [Source:HGNC Symbol;Acc:HGNC:13128]
ANP32B	ENSG00000136938	-0.598613	0.00103566	acidic nuclear phosphoprotein 32 family member B [Source:HGNC Symbol;Acc:HGNC:16677]
SLC6A17	ENSG00000197106	2.81495	0.00103897	solute carrier family 6 member 17 [Source:HGNC Symbol;Acc:HGNC:31399]	Yes
SLC35F5	ENSG00000115084	0.590231	0.00103926	solute carrier family 35 member F5 [Source:HGNC Symbol;Acc:HGNC:23617]
TMEM126B	ENSG00000171204	0.91189	0.00104167	transmembrane protein 126B [Source:HGNC Symbol;Acc:HGNC:30883]
FLVCR2	ENSG00000119686	1.24258	0.00104296	FLVCR heme transporter 2 [Source:HGNC Symbol;Acc:HGNC:20105]
CD164	ENSG00000135535	0.809145	0.00105021	CD164 molecule [Source:HGNC Symbol;Acc:HGNC:1632]
GPX3	ENSG00000211445	1.72409	0.00105545	glutathione peroxidase 3 [Source:HGNC Symbol;Acc:HGNC:4555]	Yes
P3H2	ENSG00000090530	-1.79981	0.00105836	prolyl 3-hydroxylase 2 [Source:HGNC Symbol;Acc:HGNC:19317]	Yes
ADAM32	ENSG00000197140	1.20271	0.00106409	ADAM metallopeptidase domain 32 [Source:HGNC Symbol;Acc:HGNC:15479]
SIRLNT	ENSG00000253802	3.4943	0.00106772	SIRT1 regulating lncRNA tumor promoter [Source:HGNC Symbol;Acc:HGNC:53902]	Yes
ENSG00000260949	ENSG00000260949	-1.51518	0.00106772	novel transcript, overlapping to EIF4EBP1	Yes
CRTAC1	ENSG00000095713	3.8324	0.00107123	cartilage acidic protein 1 [Source:HGNC Symbol;Acc:HGNC:14882]	Yes
SESN2	ENSG00000130766	-0.892789	0.00108107	sestrin 2 [Source:HGNC Symbol;Acc:HGNC:20746]
PARVB	ENSG00000188677	1.13431	0.00108147	parvin beta [Source:HGNC Symbol;Acc:HGNC:14653]
ID3	ENSG00000117318	1.58034	0.00108237	inhibitor of DNA binding 3, HLH protein [Source:HGNC Symbol;Acc:HGNC:5362]	Yes
KCTD1	ENSG00000134504	-0.857248	0.00109496	potassium channel tetramerization domain containing 1 [Source:HGNC Symbol;Acc:HGNC:18249]
NAT1	ENSG00000171428	1.0137	0.0011031	N-acetyltransferase 1 [Source:HGNC Symbol;Acc:HGNC:7645]
COL6A1	ENSG00000142156	-1.3267	0.00112586	collagen type VI alpha 1 chain [Source:HGNC Symbol;Acc:HGNC:2211]
TAS1R3	ENSG00000169962	-1.72072	0.00112643	taste 1 receptor member 3 [Source:HGNC Symbol;Acc:HGNC:15661]	Yes
TLCD4	ENSG00000152078	1.77111	0.00114305	TLC domain containing 4 [Source:HGNC Symbol;Acc:HGNC:26477]	Yes
MSX1	ENSG00000163132	1.50922	0.00114559	msh homeobox 1 [Source:HGNC Symbol;Acc:HGNC:7391]	Yes
MAP4K4	ENSG00000071054	-0.927471	0.00115838	mitogen-activated protein kinase kinase kinase kinase 4 [Source:HGNC Symbol;Acc:HGNC:6866]
RCC2	ENSG00000179051	-1.03447	0.00115838	regulator of chromosome condensation 2 [Source:HGNC Symbol;Acc:HGNC:30297]
DSC3	ENSG00000134762	4.37241	0.00115932	desmocollin 3 [Source:HGNC Symbol;Acc:HGNC:3037]	Yes
ETFDH	ENSG00000171503	0.492072	0.00115932	electron transfer flavoprotein dehydrogenase [Source:HGNC Symbol;Acc:HGNC:3483]
PTPRN	ENSG00000054356	2.01623	0.00116316	protein tyrosine phosphatase receptor type N [Source:HGNC Symbol;Acc:HGNC:9676]	Yes
STS	ENSG00000101846	1.11313	0.00116577	steroid sulfatase [Source:HGNC Symbol;Acc:HGNC:11425]
ATP6V0E1	ENSG00000113732	1.13921	0.00116577	ATPase H+ transporting V0 subunit e1 [Source:HGNC Symbol;Acc:HGNC:863]
ST3GAL5	ENSG00000115525	1.86309	0.00116958	ST3 beta-galactoside alpha-2,3-sialyltransferase 5 [Source:HGNC Symbol;Acc:HGNC:10872]	Yes
KRTAP1-1	ENSG00000188581	3.2234	0.00117156	keratin associated protein 1-1 [Source:HGNC Symbol;Acc:HGNC:16772]	Yes
ENSG00000272335	ENSG00000272335	0.650734	0.00117156	novel transcript
ZMAT4	ENSG00000165061	2.35026	0.001174	zinc finger matrin-type 4 [Source:HGNC Symbol;Acc:HGNC:25844]	Yes
DOK6	ENSG00000206052	1.9659	0.001174	docking protein 6 [Source:HGNC Symbol;Acc:HGNC:28301]	Yes
P3H1	ENSG00000117385	-0.747652	0.00117822	prolyl 3-hydroxylase 1 [Source:HGNC Symbol;Acc:HGNC:19316]
P4HTM	ENSG00000178467	0.575417	0.00118063	prolyl 4-hydroxylase, transmembrane [Source:HGNC Symbol;Acc:HGNC:28858]
KIAA0825	ENSG00000185261	0.763254	0.00118063	KIAA0825 [Source:HGNC Symbol;Acc:HGNC:28532]
LONP1	ENSG00000196365	-0.536147	0.00119155	lon peptidase 1, mitochondrial [Source:HGNC Symbol;Acc:HGNC:9479]
CTSH	ENSG00000103811	2.08008	0.00120892	cathepsin H [Source:HGNC Symbol;Acc:HGNC:2535]	Yes
PCDHB2	ENSG00000112852	1.55311	0.00120892	protocadherin beta 2 [Source:HGNC Symbol;Acc:HGNC:8687]	Yes
TSPAN5-DT	ENSG00000260641	-1.49338	0.00120892	TSPAN5 divergent transcript [Source:HGNC Symbol;Acc:HGNC:55389]
ENSG00000238258	ENSG00000238258	-1.58376	0.00123412	novel transcript, antisense to NRP1	Yes
CMPK1	ENSG00000162368	0.685819	0.00124657	cytidine/uridine monophosphate kinase 1 [Source:HGNC Symbol;Acc:HGNC:18170]
ARHGEF3	ENSG00000163947	-1.15397	0.00125496	Rho guanine nucleotide exchange factor 3 [Source:HGNC Symbol;Acc:HGNC:683]
RNF146	ENSG00000118518	0.440404	0.00125761	ring finger protein 146 [Source:HGNC Symbol;Acc:HGNC:21336]
SUCLG2	ENSG00000172340	0.935714	0.00126545	succinate-CoA ligase GDP-forming subunit beta [Source:HGNC Symbol;Acc:HGNC:11450]
FHL3	ENSG00000183386	-0.79322	0.00127857	four and a half LIM domains 3 [Source:HGNC Symbol;Acc:HGNC:3704]
KMT5AP2	ENSG00000232531	-0.94925	0.00127857	KMT5A pseudogene 2 [Source:HGNC Symbol;Acc:HGNC:54727]
SRP9	ENSG00000143742	0.863903	0.00127933	signal recognition particle 9 [Source:HGNC Symbol;Acc:HGNC:11304]
CDC42EP2	ENSG00000149798	-1.17523	0.00127933	CDC42 effector protein 2 [Source:HGNC Symbol;Acc:HGNC:16263]
FTLP3	ENSG00000226608	1.01905	0.00127933	ferritin light chain pseudogene 3 [Source:HGNC Symbol;Acc:HGNC:4000]
HOXB7	ENSG00000260027	-5.10614	0.0012856	homeobox B7 [Source:HGNC Symbol;Acc:HGNC:5118]	Yes
ATP1A1	ENSG00000163399	0.34221	0.00129431	ATPase Na+/K+ transporting subunit alpha 1 [Source:HGNC Symbol;Acc:HGNC:799]
MFSD6	ENSG00000151690	0.839512	0.00129953	major facilitator superfamily domain containing 6 [Source:HGNC Symbol;Acc:HGNC:24711]
FOXF1	ENSG00000103241	5.59015	0.00130207	forkhead box F1 [Source:HGNC Symbol;Acc:HGNC:3809]	Yes
MFSD14B	ENSG00000148110	0.587747	0.00130592	major facilitator superfamily domain containing 14B [Source:HGNC Symbol;Acc:HGNC:23376]
ZNF727	ENSG00000214652	2.9907	0.001306	zinc finger protein 727 [Source:HGNC Symbol;Acc:HGNC:22785]	Yes
ISLR2	ENSG00000167178	-2.69922	0.00130786	immunoglobulin superfamily containing leucine rich repeat 2 [Source:HGNC Symbol;Acc:HGNC:29286]	Yes
MR1	ENSG00000153029	0.613352	0.00130933	major histocompatibility complex, class I-related [Source:HGNC Symbol;Acc:HGNC:4975]
DNAJC25	ENSG00000059769	0.661113	0.00131411	DnaJ heat shock protein family (Hsp40) member C25 [Source:HGNC Symbol;Acc:HGNC:34187]
WWC1	ENSG00000113645	1.92366	0.00132585	WW and C2 domain containing 1 [Source:HGNC Symbol;Acc:HGNC:29435]	Yes
EFNA3	ENSG00000143590	-1.15718	0.00132585	ephrin A3 [Source:HGNC Symbol;Acc:HGNC:3223]
WNK3	ENSG00000196632	1.05193	0.00133542	WNK lysine deficient protein kinase 3 [Source:HGNC Symbol;Acc:HGNC:14543]
LRRIQ1	ENSG00000133640	-2.0796	0.00133748	leucine rich repeats and IQ motif containing 1 [Source:HGNC Symbol;Acc:HGNC:25708]	Yes
TNFSF13	ENSG00000161955	-1.05708	0.00133964	TNF superfamily member 13 [Source:HGNC Symbol;Acc:HGNC:11928]
OSER1	ENSG00000132823	0.830302	0.00134602	oxidative stress responsive serine rich 1 [Source:HGNC Symbol;Acc:HGNC:16105]
ALPK3	ENSG00000136383	-1.61896	0.00134602	alpha kinase 3 [Source:HGNC Symbol;Acc:HGNC:17574]	Yes
EPHB4	ENSG00000196411	-0.838061	0.0013469	EPH receptor B4 [Source:HGNC Symbol;Acc:HGNC:3395]
LAMA3	ENSG00000053747	2.23002	0.00134861	laminin subunit alpha 3 [Source:HGNC Symbol;Acc:HGNC:6483]	Yes
TENM3-AS1	ENSG00000177822	-1.03459	0.00134861	TENM3 antisense RNA 1 [Source:HGNC Symbol;Acc:HGNC:28076]
MTX1P1	ENSG00000236675	-3.0832	0.00134861	metaxin 1 pseudogene 1 [Source:HGNC Symbol;Acc:HGNC:7505]	Yes
BMP6	ENSG00000153162	1.5686	0.00135322	bone morphogenetic protein 6 [Source:HGNC Symbol;Acc:HGNC:1073]	Yes
ICMT	ENSG00000116237	0.468601	0.00135703	isoprenylcysteine carboxyl methyltransferase [Source:HGNC Symbol;Acc:HGNC:5350]
RPA2	ENSG00000117748	0.90832	0.00135856	replication protein A2 [Source:HGNC Symbol;Acc:HGNC:10290]
LPAR6	ENSG00000139679	1.00308	0.0013723	lysophosphatidic acid receptor 6 [Source:HGNC Symbol;Acc:HGNC:15520]
PXYLP1	ENSG00000155893	0.955283	0.00137576	2-phosphoxylose phosphatase 1 [Source:HGNC Symbol;Acc:HGNC:26303]
SLC11A2	ENSG00000110911	0.687389	0.00138083	solute carrier family 11 member 2 [Source:HGNC Symbol;Acc:HGNC:10908]
LIMK1	ENSG00000106683	-1.12801	0.00138431	LIM domain kinase 1 [Source:HGNC Symbol;Acc:HGNC:6613]
ADCY8	ENSG00000155897	4.34801	0.00138431	adenylate cyclase 8 [Source:HGNC Symbol;Acc:HGNC:239]	Yes
LYST	ENSG00000143669	0.963704	0.00138655	lysosomal trafficking regulator [Source:HGNC Symbol;Acc:HGNC:1968]
SLC4A3	ENSG00000114923	-1.3575	0.00139212	solute carrier family 4 member 3 [Source:HGNC Symbol;Acc:HGNC:11029]
BAG1	ENSG00000107262	0.812582	0.00142947	BAG cochaperone 1 [Source:HGNC Symbol;Acc:HGNC:937]
GINM1	ENSG00000055211	0.5021	0.0014304	glycoprotein integral membrane 1 [Source:HGNC Symbol;Acc:HGNC:21074]
ZNF823	ENSG00000197933	0.876105	0.00143817	zinc finger protein 823 [Source:HGNC Symbol;Acc:HGNC:30936]
HOXB5	ENSG00000120075	-4.20261	0.00144099	homeobox B5 [Source:HGNC Symbol;Acc:HGNC:5116]	Yes
MAP3K5	ENSG00000197442	-1.20235	0.00144152	mitogen-activated protein kinase kinase kinase 5 [Source:HGNC Symbol;Acc:HGNC:6857]
IFT27	ENSG00000100360	-0.588498	0.00144267	intraflagellar transport 27 [Source:HGNC Symbol;Acc:HGNC:18626]
LINC01615	ENSG00000223485	1.92623	0.0014493	long intergenic non-protein coding RNA 1615 [Source:HGNC Symbol;Acc:HGNC:51898]	Yes
NTF3	ENSG00000185652	2.52505	0.00145276	neurotrophin 3 [Source:HGNC Symbol;Acc:HGNC:8023]	Yes
AJM1	ENSG00000232434	-1.03261	0.00145276	apical junction component 1 homolog [Source:HGNC Symbol;Acc:HGNC:37284]
CCDC77	ENSG00000120647	0.67091	0.00145718	coiled-coil domain containing 77 [Source:HGNC Symbol;Acc:HGNC:28203]
FAM169A	ENSG00000198780	1.90121	0.00145815	family with sequence similarity 169 member A [Source:HGNC Symbol;Acc:HGNC:29138]	Yes
TRIP10	ENSG00000125733	-0.848038	0.00146182	thyroid hormone receptor interactor 10 [Source:HGNC Symbol;Acc:HGNC:12304]
CARS2	ENSG00000134905	0.692937	0.00146409	cysteinyl-tRNA synthetase 2, mitochondrial [Source:HGNC Symbol;Acc:HGNC:25695]
DDX24	ENSG00000089737	0.571388	0.0014744	DEAD-box helicase 24 [Source:HGNC Symbol;Acc:HGNC:13266]
ENSG00000271984	ENSG00000271984	-1.39278	0.00148605	novel transcript, antisense to CTSA
GPR89A	ENSG00000117262	0.78622	0.00148631	G protein-coupled receptor 89A [Source:HGNC Symbol;Acc:HGNC:31984]
TRIM46	ENSG00000163462	-1.25984	0.00149106	tripartite motif containing 46 [Source:HGNC Symbol;Acc:HGNC:19019]
ENSG00000225205	ENSG00000225205	-1.37243	0.0014957	novel transcript
ELOVL3	ENSG00000119915	1.54715	0.00149681	ELOVL fatty acid elongase 3 [Source:HGNC Symbol;Acc:HGNC:18047]	Yes
OSBPL7	ENSG00000006025	-1.02818	0.00149964	oxysterol binding protein like 7 [Source:HGNC Symbol;Acc:HGNC:16387]
VMA21	ENSG00000160131	0.625677	0.00150319	vacuolar ATPase assembly factor VMA21 [Source:HGNC Symbol;Acc:HGNC:22082]
BHLHB9	ENSG00000198908	1.03573	0.00151077	basic helix-loop-helix family member b9 [Source:HGNC Symbol;Acc:HGNC:29353]
SHOX2	ENSG00000168779	2.52523	0.00151432	short stature homeobox 2 [Source:HGNC Symbol;Acc:HGNC:10854]	Yes
COLGALT1	ENSG00000130309	-0.593902	0.0015181	collagen beta(1-O)galactosyltransferase 1 [Source:HGNC Symbol;Acc:HGNC:26182]
CLSTN3	ENSG00000139182	-1.10937	0.00152737	calsyntenin 3 [Source:HGNC Symbol;Acc:HGNC:18371]
PDK4	ENSG00000004799	1.73935	0.00153265	pyruvate dehydrogenase kinase 4 [Source:HGNC Symbol;Acc:HGNC:8812]	Yes
CBFB	ENSG00000067955	0.679057	0.00154528	core-binding factor subunit beta [Source:HGNC Symbol;Acc:HGNC:1539]
ACADSB	ENSG00000196177	0.400823	0.00154767	acyl-CoA dehydrogenase short/branched chain [Source:HGNC Symbol;Acc:HGNC:91]
P2RX7	ENSG00000089041	1.86721	0.00157313	purinergic receptor P2X 7 [Source:HGNC Symbol;Acc:HGNC:8537]	Yes
NAA50	ENSG00000121579	0.535318	0.00157671	N-alpha-acetyltransferase 50, NatE catalytic subunit [Source:HGNC Symbol;Acc:HGNC:29533]
CSF1R	ENSG00000182578	-1.7409	0.00157671	colony stimulating factor 1 receptor [Source:HGNC Symbol;Acc:HGNC:2433]	Yes
IGFBP4	ENSG00000141753	1.32372	0.0015813	insulin like growth factor binding protein 4 [Source:HGNC Symbol;Acc:HGNC:5473]
ENSG00000260650	ENSG00000260650	-2.88267	0.0015813	novel transcript	Yes
IFNE	ENSG00000184995	-1.26678	0.00158785	interferon epsilon [Source:HGNC Symbol;Acc:HGNC:18163]
TMEM109	ENSG00000110108	0.520969	0.00160921	transmembrane protein 109 [Source:HGNC Symbol;Acc:HGNC:28771]
MBLAC2	ENSG00000176055	0.617604	0.00161102	metallo-beta-lactamase domain containing 2 [Source:HGNC Symbol;Acc:HGNC:33711]
DENND10	ENSG00000119979	0.625943	0.00161753	DENN domain containing 10 [Source:HGNC Symbol;Acc:HGNC:31793]
ENSG00000279117	ENSG00000279117	-2.29519	0.00162956	TEC	Yes
ACTC1	ENSG00000159251	3.74925	0.00164142	actin alpha cardiac muscle 1 [Source:HGNC Symbol;Acc:HGNC:143]	Yes
ZDHHC14	ENSG00000175048	1.28122	0.00164164	zinc finger DHHC-type palmitoyltransferase 14 [Source:HGNC Symbol;Acc:HGNC:20341]
NAALADL2	ENSG00000177694	0.749316	0.00164164	N-acetylated alpha-linked acidic dipeptidase like 2 [Source:HGNC Symbol;Acc:HGNC:23219]
TRIQK	ENSG00000205133	0.682614	0.00164164	triple QxxK/R motif containing [Source:HGNC Symbol;Acc:HGNC:27828]
TMEM200C	ENSG00000206432	-2.86983	0.00164164	transmembrane protein 200C [Source:HGNC Symbol;Acc:HGNC:37208]	Yes
NBAT1	ENSG00000260455	2.33321	0.00164429	neuroblastoma associated transcript 1 [Source:HGNC Symbol;Acc:HGNC:49075]	Yes
ASPHD2	ENSG00000128203	-0.99657	0.00166726	aspartate beta-hydroxylase domain containing 2 [Source:HGNC Symbol;Acc:HGNC:30437]
PFN2	ENSG00000070087	0.460874	0.00166948	profilin 2 [Source:HGNC Symbol;Acc:HGNC:8882]
LUM	ENSG00000139329	1.83704	0.00166948	lumican [Source:HGNC Symbol;Acc:HGNC:6724]	Yes
CRADD	ENSG00000169372	1.0003	0.00166948	CASP2 and RIPK1 domain containing adaptor with death domain [Source:HGNC Symbol;Acc:HGNC:2340]
SLC9A1	ENSG00000090020	-1.1664	0.00167012	solute carrier family 9 member A1 [Source:HGNC Symbol;Acc:HGNC:11071]
ENSG00000256802	ENSG00000256802	-2.08145	0.00167012	novel transcript, antisense to TJP1	Yes
SLF1	ENSG00000133302	0.554791	0.00167196	SMC5-SMC6 complex localization factor 1 [Source:HGNC Symbol;Acc:HGNC:25408]
POLR2L	ENSG00000177700	1.07068	0.00167196	RNA polymerase II, I and III subunit L [Source:HGNC Symbol;Acc:HGNC:9199]
COL6A2	ENSG00000142173	-1.23078	0.00167885	collagen type VI alpha 2 chain [Source:HGNC Symbol;Acc:HGNC:2212]
TUBA4A	ENSG00000127824	1.32928	0.0016889	tubulin alpha 4a [Source:HGNC Symbol;Acc:HGNC:12407]
NFKBIL1	ENSG00000204498	-0.503075	0.00169507	NFKB inhibitor like 1 [Source:HGNC Symbol;Acc:HGNC:7800]
PDE5A	ENSG00000138735	0.99534	0.00169882	phosphodiesterase 5A [Source:HGNC Symbol;Acc:HGNC:8784]
LUZP2	ENSG00000187398	3.81513	0.00169882	leucine zipper protein 2 [Source:HGNC Symbol;Acc:HGNC:23206]	Yes
CCDC169	ENSG00000242715	1.19789	0.00169882	coiled-coil domain containing 169 [Source:HGNC Symbol;Acc:HGNC:34361]
FBXL5	ENSG00000118564	0.56223	0.00170306	F-box and leucine rich repeat protein 5 [Source:HGNC Symbol;Acc:HGNC:13602]
FAM131B	ENSG00000159784	-1.17111	0.00172126	family with sequence similarity 131 member B [Source:HGNC Symbol;Acc:HGNC:22202]
SPTSSA	ENSG00000165389	0.873497	0.00174846	serine palmitoyltransferase small subunit A [Source:HGNC Symbol;Acc:HGNC:20361]
EMILIN1	ENSG00000138080	-0.973296	0.0017486	elastin microfibril interfacer 1 [Source:HGNC Symbol;Acc:HGNC:19880]
GPC2	ENSG00000213420	-1.0026	0.00175244	glypican 2 [Source:HGNC Symbol;Acc:HGNC:4450]
ABHD6	ENSG00000163686	0.546407	0.0017551	abhydrolase domain containing 6, acylglycerol lipase [Source:HGNC Symbol;Acc:HGNC:21398]
UNG	ENSG00000076248	0.691233	0.00175973	uracil DNA glycosylase [Source:HGNC Symbol;Acc:HGNC:12572]
SULT4A1	ENSG00000130540	3.42344	0.00177053	sulfotransferase family 4A member 1 [Source:HGNC Symbol;Acc:HGNC:14903]	Yes
AQP1	ENSG00000240583	1.97966	0.00177982	aquaporin 1 (Colton blood group) [Source:HGNC Symbol;Acc:HGNC:633]	Yes
ABCB5	ENSG00000004846	3.01239	0.00178404	ATP binding cassette subfamily B member 5 [Source:HGNC Symbol;Acc:HGNC:46]	Yes
ELN	ENSG00000049540	2.72462	0.00178404	elastin [Source:HGNC Symbol;Acc:HGNC:3327]	Yes
OGFR	ENSG00000060491	-0.669533	0.00178404	opioid growth factor receptor [Source:HGNC Symbol;Acc:HGNC:15768]
MAZ	ENSG00000103495	-1.03051	0.00178404	MYC associated zinc finger protein [Source:HGNC Symbol;Acc:HGNC:6914]
SPRYD4	ENSG00000176422	0.742169	0.00178404	SPRY domain containing 4 [Source:HGNC Symbol;Acc:HGNC:27468]
HERC5	ENSG00000138646	1.8314	0.00179316	HECT and RLD domain containing E3 ubiquitin protein ligase 5 [Source:HGNC Symbol;Acc:HGNC:24368]	Yes
C4A	ENSG00000244731	-2.22452	0.0018019	complement C4A (Rodgers blood group) [Source:HGNC Symbol;Acc:HGNC:1323]	Yes
C4A-1	ENSG00000244731	-2.22452	0.0018019	complement C4A (Rodgers blood group) [Source:HGNC Symbol;Acc:HGNC:1323]	Yes
RPS2P32	ENSG00000232818	1.15685	0.00180249	ribosomal protein S2 pseudogene 32 [Source:HGNC Symbol;Acc:HGNC:30518]
MSMO1	ENSG00000052802	0.944458	0.00180267	methylsterol monooxygenase 1 [Source:HGNC Symbol;Acc:HGNC:10545]
SBDS	ENSG00000126524	0.812834	0.00180692	SBDS ribosome maturation factor [Source:HGNC Symbol;Acc:HGNC:19440]
MTMR1	ENSG00000063601	-0.458517	0.00181986	myotubularin related protein 1 [Source:HGNC Symbol;Acc:HGNC:7449]
HAND2-AS1	ENSG00000237125	7.25299	0.00182206	HAND2 antisense RNA 1 [Source:HGNC Symbol;Acc:HGNC:48872]	Yes
TMBIM1	ENSG00000135926	0.757355	0.00182659	transmembrane BAX inhibitor motif containing 1 [Source:HGNC Symbol;Acc:HGNC:23410]
TMEM182	ENSG00000170417	0.744921	0.00182824	transmembrane protein 182 [Source:HGNC Symbol;Acc:HGNC:26391]
CAB39	ENSG00000135932	0.396392	0.00183109	calcium binding protein 39 [Source:HGNC Symbol;Acc:HGNC:20292]
DNAH3	ENSG00000158486	-2.8534	0.00183109	dynein axonemal heavy chain 3 [Source:HGNC Symbol;Acc:HGNC:2949]	Yes
MATN3	ENSG00000132031	-0.911868	0.0018335	matrilin 3 [Source:HGNC Symbol;Acc:HGNC:6909]
RNF144B	ENSG00000137393	1.85437	0.00183976	ring finger protein 144B [Source:HGNC Symbol;Acc:HGNC:21578]	Yes
MIR541	ENSG00000216179	-2.48172	0.00184309	microRNA 541 [Source:HGNC Symbol;Acc:HGNC:33650]	Yes
SCARB2	ENSG00000138760	0.591584	0.00184988	scavenger receptor class B member 2 [Source:HGNC Symbol;Acc:HGNC:1665]
AP3M1	ENSG00000185009	0.532348	0.00184988	adaptor related protein complex 3 subunit mu 1 [Source:HGNC Symbol;Acc:HGNC:569]
MIR1244-2	ENSG00000283498	1.16945	0.00185219	microRNA 1244-2 [Source:HGNC Symbol;Acc:HGNC:38321]
MAPK14	ENSG00000112062	0.507398	0.00185706	mitogen-activated protein kinase 14 [Source:HGNC Symbol;Acc:HGNC:6876]
FGL2	ENSG00000127951	4.30228	0.00186331	fibrinogen like 2 [Source:HGNC Symbol;Acc:HGNC:3696]	Yes
ITFG1	ENSG00000129636	0.672092	0.00186331	integrin alpha FG-GAP repeat containing 1 [Source:HGNC Symbol;Acc:HGNC:30697]
SORBS2	ENSG00000154556	1.06359	0.00186331	sorbin and SH3 domain containing 2 [Source:HGNC Symbol;Acc:HGNC:24098]
MMGT1	ENSG00000169446	0.517753	0.00186331	membrane magnesium transporter 1 [Source:HGNC Symbol;Acc:HGNC:28100]
MARCKSL1	ENSG00000175130	-1.01348	0.00186331	MARCKS like 1 [Source:HGNC Symbol;Acc:HGNC:7142]
RASSF9	ENSG00000198774	-1.4748	0.00186331	Ras association domain family member 9 [Source:HGNC Symbol;Acc:HGNC:15739]
ENSG00000253837	ENSG00000253837	-1.53384	0.00186331	novel transcript	Yes
ENSG00000280211	ENSG00000280211	-1.81161	0.00186331	novel transcript, antisense to RNF40	Yes
WFIKKN1	ENSG00000127578	-2.17706	0.00186677	WAP, follistatin/kazal, immunoglobulin, kunitz and netrin domain containing 1 [Source:HGNC Symbol;Acc:HGNC:30912]	Yes
ROGDI	ENSG00000067836	-0.805494	0.00187283	rogdi atypical leucine zipper [Source:HGNC Symbol;Acc:HGNC:29478]
GIP	ENSG00000159224	-3.758	0.00189168	gastric inhibitory polypeptide [Source:HGNC Symbol;Acc:HGNC:4270]	Yes
TRAF6	ENSG00000175104	0.53096	0.00189168	TNF receptor associated factor 6 [Source:HGNC Symbol;Acc:HGNC:12036]
LEPROTL1	ENSG00000104660	0.685896	0.00189185	leptin receptor overlapping transcript like 1 [Source:HGNC Symbol;Acc:HGNC:6555]
EPHA4	ENSG00000116106	1.60964	0.00191995	EPH receptor A4 [Source:HGNC Symbol;Acc:HGNC:3388]	Yes
SELENOF	ENSG00000183291	0.864604	0.00192952	selenoprotein F [Source:HGNC Symbol;Acc:HGNC:17705]
GLO1	ENSG00000124767	0.764555	0.00193384	glyoxalase I [Source:HGNC Symbol;Acc:HGNC:4323]
CTSB	ENSG00000164733	1.01196	0.00193384	cathepsin B [Source:HGNC Symbol;Acc:HGNC:2527]
SLC35G2	ENSG00000168917	1.00758	0.00196248	solute carrier family 35 member G2 [Source:HGNC Symbol;Acc:HGNC:28480]
RAF1	ENSG00000132155	0.515112	0.00196287	Raf-1 proto-oncogene, serine/threonine kinase [Source:HGNC Symbol;Acc:HGNC:9829]
PPP1R3D	ENSG00000132825	0.599627	0.00197464	protein phosphatase 1 regulatory subunit 3D [Source:HGNC Symbol;Acc:HGNC:9294]
SPOCK3	ENSG00000196104	-4.67225	0.00198745	SPARC (osteonectin), cwcv and kazal like domains proteoglycan 3 [Source:HGNC Symbol;Acc:HGNC:13565]	Yes
SH3GL1	ENSG00000141985	-0.742322	0.00199307	SH3 domain containing GRB2 like 1, endophilin A2 [Source:HGNC Symbol;Acc:HGNC:10830]
RXFP1	ENSG00000171509	5.71579	0.00199307	relaxin family peptide receptor 1 [Source:HGNC Symbol;Acc:HGNC:19718]	Yes
EFR3B	ENSG00000084710	1.46327	0.0019945	EFR3 homolog B [Source:HGNC Symbol;Acc:HGNC:29155]
LEPR	ENSG00000116678	1.69777	0.00199456	leptin receptor [Source:HGNC Symbol;Acc:HGNC:6554]	Yes
GYG1	ENSG00000163754	0.694836	0.00199632	glycogenin 1 [Source:HGNC Symbol;Acc:HGNC:4699]
DNMBP	ENSG00000107554	-1.2255	0.00200919	dynamin binding protein [Source:HGNC Symbol;Acc:HGNC:30373]
ANKRD6	ENSG00000135299	1.04608	0.00201502	ankyrin repeat domain 6 [Source:HGNC Symbol;Acc:HGNC:17280]
TRAPPC8	ENSG00000153339	0.386491	0.00201619	trafficking protein particle complex subunit 8 [Source:HGNC Symbol;Acc:HGNC:29169]
OTULINL	ENSG00000145569	3.26205	0.00201763	OTU deubiquitinase with linear linkage specificity like [Source:HGNC Symbol;Acc:HGNC:25629]	Yes
SUMF1	ENSG00000144455	0.831806	0.00202241	sulfatase modifying factor 1 [Source:HGNC Symbol;Acc:HGNC:20376]
PYCR1	ENSG00000183010	-0.751395	0.00202383	pyrroline-5-carboxylate reductase 1 [Source:HGNC Symbol;Acc:HGNC:9721]
MBTPS2	ENSG00000012174	0.559466	0.00202784	membrane bound transcription factor peptidase, site 2 [Source:HGNC Symbol;Acc:HGNC:15455]
C3	ENSG00000125730	-3.77022	0.00202784	complement C3 [Source:HGNC Symbol;Acc:HGNC:1318]	Yes
LCLAT1	ENSG00000172954	0.510976	0.00202805	lysocardiolipin acyltransferase 1 [Source:HGNC Symbol;Acc:HGNC:26756]
GAS1	ENSG00000180447	2.10067	0.00205424	growth arrest specific 1 [Source:HGNC Symbol;Acc:HGNC:4165]	Yes
ENSG00000183889	ENSG00000183889	-1.45207	0.00205664	novel member of the nuclear pore complex interacting protein NPIP gene family
UBXN4	ENSG00000144224	0.282262	0.00207297	UBX domain protein 4 [Source:HGNC Symbol;Acc:HGNC:14860]
NUP35	ENSG00000163002	0.943029	0.00208901	nucleoporin 35 [Source:HGNC Symbol;Acc:HGNC:29797]
CDKN2B	ENSG00000147883	-1.40409	0.00209409	cyclin dependent kinase inhibitor 2B [Source:HGNC Symbol;Acc:HGNC:1788]
PPM1K	ENSG00000163644	0.997993	0.00209977	protein phosphatase, Mg2+/Mn2+ dependent 1K [Source:HGNC Symbol;Acc:HGNC:25415]
CLIC6	ENSG00000159212	3.09106	0.00211662	chloride intracellular channel 6 [Source:HGNC Symbol;Acc:HGNC:2065]	Yes
ANXA5	ENSG00000164111	0.922608	0.00212415	annexin A5 [Source:HGNC Symbol;Acc:HGNC:543]
THBS3	ENSG00000169231	-1.31537	0.00213321	thrombospondin 3 [Source:HGNC Symbol;Acc:HGNC:11787]
TANGO2	ENSG00000183597	0.598278	0.00213321	transport and golgi organization 2 homolog [Source:HGNC Symbol;Acc:HGNC:25439]
SV2A	ENSG00000159164	-1.15232	0.00215064	synaptic vesicle glycoprotein 2A [Source:HGNC Symbol;Acc:HGNC:20566]
ARHGAP9	ENSG00000123329	-2.04894	0.00215335	Rho GTPase activating protein 9 [Source:HGNC Symbol;Acc:HGNC:14130]	Yes
ALOX5AP	ENSG00000132965	-1.84403	0.002154	arachidonate 5-lipoxygenase activating protein [Source:HGNC Symbol;Acc:HGNC:436]	Yes
TM2D1	ENSG00000162604	0.75969	0.00216603	TM2 domain containing 1 [Source:HGNC Symbol;Acc:HGNC:24142]
TRO	ENSG00000067445	-0.837781	0.00216717	trophinin [Source:HGNC Symbol;Acc:HGNC:12326]
MFSD8	ENSG00000164073	0.458855	0.00216977	major facilitator superfamily domain containing 8 [Source:HGNC Symbol;Acc:HGNC:28486]
CADM4	ENSG00000105767	-1.22676	0.0021699	cell adhesion molecule 4 [Source:HGNC Symbol;Acc:HGNC:30825]
GPN3	ENSG00000111231	0.85521	0.00217019	GPN-loop GTPase 3 [Source:HGNC Symbol;Acc:HGNC:30186]
KIF25	ENSG00000125337	3.97421	0.00218078	kinesin family member 25 [Source:HGNC Symbol;Acc:HGNC:6390]	Yes
TRIOBP	ENSG00000100106	-0.940683	0.00218273	TRIO and F-actin binding protein [Source:HGNC Symbol;Acc:HGNC:17009]
ABCB9	ENSG00000150967	-0.745713	0.00218324	ATP binding cassette subfamily B member 9 [Source:HGNC Symbol;Acc:HGNC:50]
MST1L	ENSG00000186715	-1.69934	0.00218324	macrophage stimulating 1 like (pseudogene) [Source:HGNC Symbol;Acc:HGNC:7390]	Yes
PAPLN	ENSG00000100767	-1.21241	0.0022025	papilin, proteoglycan like sulfated glycoprotein [Source:HGNC Symbol;Acc:HGNC:19262]
PLA2G6	ENSG00000184381	-0.882014	0.0022025	phospholipase A2 group VI [Source:HGNC Symbol;Acc:HGNC:9039]
KIDINS220	ENSG00000134313	0.388688	0.00221356	kinase D interacting substrate 220 [Source:HGNC Symbol;Acc:HGNC:29508]
SNED1	ENSG00000162804	-1.60254	0.00221356	sushi, nidogen and EGF like domains 1 [Source:HGNC Symbol;Acc:HGNC:24696]	Yes
ANKZF1	ENSG00000163516	-0.529398	0.00221865	ankyrin repeat and zinc finger peptidyl tRNA hydrolase 1 [Source:HGNC Symbol;Acc:HGNC:25527]
ENSG00000278978	ENSG00000278978	2.10714	0.00221865	NA	Yes
ENSG00000283541	ENSG00000283541	-3.05379	0.00221865	contactin associated protein-like 3B (CNTNAP3B) pseudogene	Yes
ATL2	ENSG00000119787	0.313553	0.00223513	atlastin GTPase 2 [Source:HGNC Symbol;Acc:HGNC:24047]
TBILA	ENSG00000261488	-1.81861	0.0022357	TGF-beta induced lncRNA [Source:HGNC Symbol;Acc:HGNC:53943]	Yes
CEP170P1	ENSG00000154608	-0.675543	0.00225249	centrosomal protein 170 pseudogene 1 [Source:HGNC Symbol;Acc:HGNC:28364]
EVI2A	ENSG00000126860	2.16108	0.00225661	ecotropic viral integration site 2A [Source:HGNC Symbol;Acc:HGNC:3499]	Yes
PTPRZ1	ENSG00000106278	4.87435	0.00225814	protein tyrosine phosphatase receptor type Z1 [Source:HGNC Symbol;Acc:HGNC:9685]	Yes
VPS26A	ENSG00000122958	0.482926	0.00226367	VPS26, retromer complex component A [Source:HGNC Symbol;Acc:HGNC:12711]
PCNX4	ENSG00000126773	0.4761	0.00226367	pecanex 4 [Source:HGNC Symbol;Acc:HGNC:20349]
SOX12	ENSG00000177732	-1.23251	0.00226656	SRY-box transcription factor 12 [Source:HGNC Symbol;Acc:HGNC:11198]
SHROOM4	ENSG00000158352	-0.932659	0.0022742	shroom family member 4 [Source:HGNC Symbol;Acc:HGNC:29215]
ENSG00000215861	ENSG00000215861	1.59734	0.0022781	phosphodiesterase 4D interacting protein (myomegalin) (PDE4DIP) pseudogene	Yes
PRKAR1A	ENSG00000108946	0.479816	0.00228966	protein kinase cAMP-dependent type I regulatory subunit alpha [Source:HGNC Symbol;Acc:HGNC:9388]
POPDC3	ENSG00000132429	0.986191	0.00229798	popeye domain containing 3 [Source:HGNC Symbol;Acc:HGNC:17649]
ZMAT1	ENSG00000166432	-1.50489	0.00230095	zinc finger matrin-type 1 [Source:HGNC Symbol;Acc:HGNC:29377]	Yes
ABHD8	ENSG00000127220	-0.749221	0.00230256	abhydrolase domain containing 8 [Source:HGNC Symbol;Acc:HGNC:23759]
CYSTM1	ENSG00000120306	1.08335	0.00230608	cysteine rich transmembrane module containing 1 [Source:HGNC Symbol;Acc:HGNC:30239]
PLEKHG4B	ENSG00000153404	4.02307	0.00230855	pleckstrin homology and RhoGEF domain containing G4B [Source:HGNC Symbol;Acc:HGNC:29399]	Yes
ACP5	ENSG00000102575	2.02667	0.00234478	acid phosphatase 5, tartrate resistant [Source:HGNC Symbol;Acc:HGNC:124]	Yes
BRIX1	ENSG00000113460	1.1689	0.00234656	biogenesis of ribosomes BRX1 [Source:HGNC Symbol;Acc:HGNC:24170]
PLPP1	ENSG00000067113	0.985719	0.00235572	phospholipid phosphatase 1 [Source:HGNC Symbol;Acc:HGNC:9228]
R3HDM4	ENSG00000198858	-0.396092	0.00237046	R3H domain containing 4 [Source:HGNC Symbol;Acc:HGNC:28270]
PHC2	ENSG00000134686	-0.779791	0.00237929	polyhomeotic homolog 2 [Source:HGNC Symbol;Acc:HGNC:3183]
ATP1B3	ENSG00000069849	0.835713	0.00238668	ATPase Na+/K+ transporting subunit beta 3 [Source:HGNC Symbol;Acc:HGNC:806]
SYT14	ENSG00000143469	-1.27967	0.00238785	synaptotagmin 14 [Source:HGNC Symbol;Acc:HGNC:23143]
PTPRH	ENSG00000080031	-2.4848	0.00239036	protein tyrosine phosphatase receptor type H [Source:HGNC Symbol;Acc:HGNC:9672]	Yes
RNF13	ENSG00000082996	0.814241	0.00239036	ring finger protein 13 [Source:HGNC Symbol;Acc:HGNC:10057]
SSTR1	ENSG00000139874	4.69712	0.00242414	somatostatin receptor 1 [Source:HGNC Symbol;Acc:HGNC:11330]	Yes
IPO11	ENSG00000086200	0.661251	0.0024251	importin 11 [Source:HGNC Symbol;Acc:HGNC:20628]
SAMD3	ENSG00000164483	-1.98941	0.00244019	sterile alpha motif domain containing 3 [Source:HGNC Symbol;Acc:HGNC:21574]	Yes
VAMP4	ENSG00000117533	0.375696	0.00244201	vesicle associated membrane protein 4 [Source:HGNC Symbol;Acc:HGNC:12645]
SLC31A2	ENSG00000136867	1.00751	0.00244285	solute carrier family 31 member 2 [Source:HGNC Symbol;Acc:HGNC:11017]
BTBD2	ENSG00000133243	-0.90678	0.00244293	BTB domain containing 2 [Source:HGNC Symbol;Acc:HGNC:15504]
IRAG2	ENSG00000118308	-1.54326	0.0024433	inositol 1,4,5-triphosphate receptor associated 2 [Source:HGNC Symbol;Acc:HGNC:6690]	Yes
FAM8A1	ENSG00000137414	0.404818	0.0024433	family with sequence similarity 8 member A1 [Source:HGNC Symbol;Acc:HGNC:16372]
NAA30	ENSG00000139977	0.457686	0.0024433	N-alpha-acetyltransferase 30, NatC catalytic subunit [Source:HGNC Symbol;Acc:HGNC:19844]
SERPINB9	ENSG00000170542	1.28196	0.0024433	serpin family B member 9 [Source:HGNC Symbol;Acc:HGNC:8955]
UBE2E2	ENSG00000182247	0.46016	0.0024433	ubiquitin conjugating enzyme E2 E2 [Source:HGNC Symbol;Acc:HGNC:12478]
ANKRD29	ENSG00000154065	1.9102	0.00246268	ankyrin repeat domain 29 [Source:HGNC Symbol;Acc:HGNC:27110]	Yes
BCL11B	ENSG00000127152	1.403	0.00246923	BAF chromatin remodeling complex subunit BCL11B [Source:HGNC Symbol;Acc:HGNC:13222]
TMEM190	ENSG00000160472	-1.81351	0.00246923	transmembrane protein 190 [Source:HGNC Symbol;Acc:HGNC:29632]	Yes
MYHAS	ENSG00000272975	-1.96367	0.00246923	myosin heavy chain gene cluster antisense RNA [Source:HGNC Symbol;Acc:HGNC:50609]	Yes
PABPC1L	ENSG00000101104	-1.5083	0.00247221	poly(A) binding protein cytoplasmic 1 like [Source:HGNC Symbol;Acc:HGNC:15797]	Yes
SUGCT-AS1	ENSG00000203446	2.57087	0.00247221	SUGCT antisense RNA 1 [Source:HGNC Symbol;Acc:HGNC:40745]	Yes
ESM1	ENSG00000164283	1.99523	0.00247484	endothelial cell specific molecule 1 [Source:HGNC Symbol;Acc:HGNC:3466]	Yes
CGNL1	ENSG00000128849	-1.78616	0.0024755	cingulin like 1 [Source:HGNC Symbol;Acc:HGNC:25931]	Yes
ARL5A	ENSG00000162980	0.632356	0.0024764	ADP ribosylation factor like GTPase 5A [Source:HGNC Symbol;Acc:HGNC:696]
HSPA2	ENSG00000126803	1.30564	0.0024777	heat shock protein family A (Hsp70) member 2 [Source:HGNC Symbol;Acc:HGNC:5235]
SLC25A37	ENSG00000147454	-1.19616	0.00248029	solute carrier family 25 member 37 [Source:HGNC Symbol;Acc:HGNC:29786]
SBSPON	ENSG00000164764	3.97869	0.00248172	somatomedin B and thrombospondin type 1 domain containing [Source:HGNC Symbol;Acc:HGNC:30362]	Yes
SCP2	ENSG00000116171	0.874213	0.00248443	sterol carrier protein 2 [Source:HGNC Symbol;Acc:HGNC:10606]
RBM20	ENSG00000203867	3.28063	0.00248443	RNA binding motif protein 20 [Source:HGNC Symbol;Acc:HGNC:27424]	Yes
SCARF1	ENSG00000074660	-1.18341	0.00249604	scavenger receptor class F member 1 [Source:HGNC Symbol;Acc:HGNC:16820]
BRMS1L	ENSG00000100916	0.395084	0.00251261	BRMS1 like transcriptional repressor [Source:HGNC Symbol;Acc:HGNC:20512]
PLXDC2	ENSG00000120594	1.02136	0.00251335	plexin domain containing 2 [Source:HGNC Symbol;Acc:HGNC:21013]
SLC22A18	ENSG00000110628	0.642147	0.00253318	solute carrier family 22 member 18 [Source:HGNC Symbol;Acc:HGNC:10964]
LDAH	ENSG00000118961	0.659803	0.0025338	lipid droplet associated hydrolase [Source:HGNC Symbol;Acc:HGNC:26145]
TTC13	ENSG00000143643	0.364496	0.0025338	tetratricopeptide repeat domain 13 [Source:HGNC Symbol;Acc:HGNC:26204]
RFK	ENSG00000135002	0.631495	0.00253386	riboflavin kinase [Source:HGNC Symbol;Acc:HGNC:30324]
PRKCIP1	ENSG00000237682	-1.10688	0.00254565	PRKCI pseudogene 1 [Source:HGNC Symbol;Acc:HGNC:55035]
RBM11	ENSG00000185272	2.548	0.00255451	RNA binding motif protein 11 [Source:HGNC Symbol;Acc:HGNC:9897]	Yes
CASP4LP	ENSG00000235505	1.64181	0.00255565	caspase 4 like, pseudogene [Source:HGNC Symbol;Acc:HGNC:53657]	Yes
TMEM255A	ENSG00000125355	4.22257	0.00255602	transmembrane protein 255A [Source:HGNC Symbol;Acc:HGNC:26086]	Yes
CCDC126	ENSG00000169193	0.814244	0.00255868	coiled-coil domain containing 126 [Source:HGNC Symbol;Acc:HGNC:22398]
PER2	ENSG00000132326	-1.42704	0.00256607	period circadian regulator 2 [Source:HGNC Symbol;Acc:HGNC:8846]
SENP2	ENSG00000163904	0.412997	0.00256607	SUMO specific peptidase 2 [Source:HGNC Symbol;Acc:HGNC:23116]
IRX1	ENSG00000170549	2.53133	0.0025717	iroquois homeobox 1 [Source:HGNC Symbol;Acc:HGNC:14358]	Yes
RAB30-DT	ENSG00000246067	0.701117	0.00257912	RAB30 divergent transcript [Source:HGNC Symbol;Acc:HGNC:48672]
TST	ENSG00000128311	1.11358	0.00258145	thiosulfate sulfurtransferase [Source:HGNC Symbol;Acc:HGNC:12388]
LANCL1	ENSG00000115365	0.585236	0.00258607	LanC like 1 [Source:HGNC Symbol;Acc:HGNC:6508]
PKIB	ENSG00000135549	-2.35966	0.00258769	cAMP-dependent protein kinase inhibitor beta [Source:HGNC Symbol;Acc:HGNC:9018]	Yes
MUS81	ENSG00000172732	-0.570643	0.00258985	MUS81 structure-specific endonuclease subunit [Source:HGNC Symbol;Acc:HGNC:29814]
SLC6A9	ENSG00000196517	-1.34805	0.00259728	solute carrier family 6 member 9 [Source:HGNC Symbol;Acc:HGNC:11056]
VPS50	ENSG00000004766	0.488406	0.00259956	VPS50 subunit of EARP/GARPII complex [Source:HGNC Symbol;Acc:HGNC:25956]
LINC01550	ENSG00000246223	2.71575	0.00260609	long intergenic non-protein coding RNA 1550 [Source:HGNC Symbol;Acc:HGNC:20111]	Yes
STK3	ENSG00000104375	0.689188	0.00261513	serine/threonine kinase 3 [Source:HGNC Symbol;Acc:HGNC:11406]
HTR7	ENSG00000148680	-1.06722	0.00261628	5-hydroxytryptamine receptor 7 [Source:HGNC Symbol;Acc:HGNC:5302]
RHOT1	ENSG00000126858	0.438403	0.00261658	ras homolog family member T1 [Source:HGNC Symbol;Acc:HGNC:21168]
C17orf107	ENSG00000205710	-0.992306	0.00261658	chromosome 17 open reading frame 107 [Source:HGNC Symbol;Acc:HGNC:37238]
OXCT2P1	ENSG00000237624	2.69044	0.0026206	3-oxoacid CoA-transferase 2 pseudogene 1 [Source:HGNC Symbol;Acc:HGNC:21627]	Yes
PLEKHG2	ENSG00000090924	-1.07448	0.00262087	pleckstrin homology and RhoGEF domain containing G2 [Source:HGNC Symbol;Acc:HGNC:29515]
RTKN2	ENSG00000182010	-1.5601	0.00262377	rhotekin 2 [Source:HGNC Symbol;Acc:HGNC:19364]	Yes
SLC2A9	ENSG00000109667	1.12573	0.00263073	solute carrier family 2 member 9 [Source:HGNC Symbol;Acc:HGNC:13446]
HSF2	ENSG00000025156	0.497182	0.00264015	heat shock transcription factor 2 [Source:HGNC Symbol;Acc:HGNC:5225]
ATP6V1H	ENSG00000047249	0.672808	0.00265022	ATPase H+ transporting V1 subunit H [Source:HGNC Symbol;Acc:HGNC:18303]
CYB5R4	ENSG00000065615	0.840551	0.00265599	cytochrome b5 reductase 4 [Source:HGNC Symbol;Acc:HGNC:20147]
LRP1-AS	ENSG00000259125	-2.36117	0.00265642	LRP1 antisense RNA [Source:HGNC Symbol;Acc:HGNC:51694]	Yes
SLC37A3	ENSG00000157800	0.709822	0.0026576	solute carrier family 37 member 3 [Source:HGNC Symbol;Acc:HGNC:20651]
ENOPH1	ENSG00000145293	0.52614	0.00265929	enolase-phosphatase 1 [Source:HGNC Symbol;Acc:HGNC:24599]
RAP2A	ENSG00000125249	0.758212	0.00266424	RAP2A, member of RAS oncogene family [Source:HGNC Symbol;Acc:HGNC:9861]
MYO6	ENSG00000196586	0.527933	0.00266747	myosin VI [Source:HGNC Symbol;Acc:HGNC:7605]
MME	ENSG00000196549	2.43074	0.00267014	membrane metalloendopeptidase [Source:HGNC Symbol;Acc:HGNC:7154]	Yes
ATAD1	ENSG00000138138	0.651743	0.0026779	ATPase family AAA domain containing 1 [Source:HGNC Symbol;Acc:HGNC:25903]
ITM2B	ENSG00000136156	0.607012	0.00269434	integral membrane protein 2B [Source:HGNC Symbol;Acc:HGNC:6174]
MYO5B	ENSG00000167306	2.88254	0.00269434	myosin VB [Source:HGNC Symbol;Acc:HGNC:7603]	Yes
ENSG00000256152	ENSG00000256152	-3.04794	0.00269434	novel transcript	Yes
MYD88	ENSG00000172936	0.840006	0.00269757	MYD88 innate immune signal transduction adaptor [Source:HGNC Symbol;Acc:HGNC:7562]
PMCH	ENSG00000183395	3.76714	0.00269856	pro-melanin concentrating hormone [Source:HGNC Symbol;Acc:HGNC:9109]	Yes
DDRGK1	ENSG00000198171	0.708349	0.00269856	DDRGK domain containing 1 [Source:HGNC Symbol;Acc:HGNC:16110]
DYNLT3	ENSG00000165169	0.856996	0.00270094	dynein light chain Tctex-type 3 [Source:HGNC Symbol;Acc:HGNC:11694]
P2RY11	ENSG00000244165	-0.973983	0.00270094	purinergic receptor P2Y11 [Source:HGNC Symbol;Acc:HGNC:8540]
MAP3K9	ENSG00000006432	-2.10738	0.00270135	mitogen-activated protein kinase kinase kinase 9 [Source:HGNC Symbol;Acc:HGNC:6861]	Yes
C5AR2	ENSG00000134830	1.98098	0.00270393	complement C5a receptor 2 [Source:HGNC Symbol;Acc:HGNC:4527]	Yes
SASH1	ENSG00000111961	0.931013	0.00271856	SAM and SH3 domain containing 1 [Source:HGNC Symbol;Acc:HGNC:19182]
FOXC2-AS1	ENSG00000260944	-1.23806	0.00272386	FOXC2 antisense RNA 1 [Source:HGNC Symbol;Acc:HGNC:50665]
IL7R	ENSG00000168685	2.49676	0.00274023	interleukin 7 receptor [Source:HGNC Symbol;Acc:HGNC:6024]	Yes
LONRF3	ENSG00000175556	2.72755	0.00275859	LON peptidase N-terminal domain and ring finger 3 [Source:HGNC Symbol;Acc:HGNC:21152]	Yes
PTGDR	ENSG00000168229	-1.71269	0.00276172	prostaglandin D2 receptor [Source:HGNC Symbol;Acc:HGNC:9591]	Yes
HSD17B3	ENSG00000130948	-1.99592	0.00276783	hydroxysteroid 17-beta dehydrogenase 3 [Source:HGNC Symbol;Acc:HGNC:5212]	Yes
CLEC18B	ENSG00000140839	-1.45483	0.00276918	C-type lectin domain family 18 member B [Source:HGNC Symbol;Acc:HGNC:33849]
INSIG2	ENSG00000125629	0.750602	0.00277095	insulin induced gene 2 [Source:HGNC Symbol;Acc:HGNC:20452]
PTMS	ENSG00000159335	-0.821322	0.00277196	parathymosin [Source:HGNC Symbol;Acc:HGNC:9629]
PTH1R	ENSG00000160801	2.33208	0.00277196	parathyroid hormone 1 receptor [Source:HGNC Symbol;Acc:HGNC:9608]	Yes
ERICH5	ENSG00000177459	1.7745	0.00277196	glutamate rich 5 [Source:HGNC Symbol;Acc:HGNC:26823]	Yes
IL12A	ENSG00000168811	1.96688	0.00278227	interleukin 12A [Source:HGNC Symbol;Acc:HGNC:5969]	Yes
MFSD11	ENSG00000092931	0.543253	0.002793	major facilitator superfamily domain containing 11 [Source:HGNC Symbol;Acc:HGNC:25458]
GLCCI1	ENSG00000106415	1.10483	0.002793	glucocorticoid induced 1 [Source:HGNC Symbol;Acc:HGNC:18713]
KMT5C	ENSG00000133247	-0.905461	0.002793	lysine methyltransferase 5C [Source:HGNC Symbol;Acc:HGNC:28405]
FPGT	ENSG00000254685	0.586136	0.002793	fucose-1-phosphate guanylyltransferase [Source:HGNC Symbol;Acc:HGNC:3825]
RAB7A	ENSG00000075785	0.509803	0.00282213	RAB7A, member RAS oncogene family [Source:HGNC Symbol;Acc:HGNC:9788]
RGN	ENSG00000130988	1.89785	0.00282669	regucalcin [Source:HGNC Symbol;Acc:HGNC:9989]	Yes
CEND1	ENSG00000184524	-1.50057	0.00282765	cell cycle exit and neuronal differentiation 1 [Source:HGNC Symbol;Acc:HGNC:24153]	Yes
ENSG00000276073	ENSG00000276073	-1.1876	0.00282765	NA
ENSG00000276850	ENSG00000276850	-3.11235	0.00282765	novel transcript	Yes
FAM174A	ENSG00000174132	0.784412	0.00283092	family with sequence similarity 174 member A [Source:HGNC Symbol;Acc:HGNC:24943]
RAMP1	ENSG00000132329	1.91374	0.00284432	receptor activity modifying protein 1 [Source:HGNC Symbol;Acc:HGNC:9843]	Yes
ADGRF5	ENSG00000069122	4.02819	0.00284769	adhesion G protein-coupled receptor F5 [Source:HGNC Symbol;Acc:HGNC:19030]	Yes
ENSG00000274270	ENSG00000274270	-1.54386	0.00286315	novel transcript, sense intronic to DLEU1	Yes
E2F1	ENSG00000101412	1.33464	0.00289926	E2F transcription factor 1 [Source:HGNC Symbol;Acc:HGNC:3113]
ENSG00000270696	ENSG00000270696	0.508174	0.00291474	novel transcript, antisense to C2orf3
PIGU	ENSG00000101464	0.890543	0.00291809	phosphatidylinositol glycan anchor biosynthesis class U [Source:HGNC Symbol;Acc:HGNC:15791]
NALT1	ENSG00000237886	-1.56726	0.00291809	NOTCH1 associated lncRNA in T cell acute lymphoblastic leukemia 1 [Source:HGNC Symbol;Acc:HGNC:51192]	Yes
DEPP1	ENSG00000165507	-1.59473	0.00292778	DEPP1 autophagy regulator [Source:HGNC Symbol;Acc:HGNC:23355]	Yes
RNF14	ENSG00000013561	0.611575	0.00293739	ring finger protein 14 [Source:HGNC Symbol;Acc:HGNC:10058]
JUP	ENSG00000173801	-0.722634	0.00293739	junction plakoglobin [Source:HGNC Symbol;Acc:HGNC:6207]
DLAT	ENSG00000150768	0.535134	0.00294451	dihydrolipoamide S-acetyltransferase [Source:HGNC Symbol;Acc:HGNC:2896]
PPM1F-AS1	ENSG00000224086	-0.587076	0.00295261	PPM1F antisense RNA 1 [Source:HGNC Symbol;Acc:HGNC:40888]
ENSG00000280073	ENSG00000280073	2.33036	0.00295261	TEC	Yes
ITGAV	ENSG00000138448	-0.793972	0.00297252	integrin subunit alpha V [Source:HGNC Symbol;Acc:HGNC:6150]
LRR1	ENSG00000165501	0.601765	0.00299613	leucine rich repeat protein 1 [Source:HGNC Symbol;Acc:HGNC:19742]
NBEAL2	ENSG00000160796	-1.01064	0.00299999	neurobeachin like 2 [Source:HGNC Symbol;Acc:HGNC:31928]
ARHGAP36	ENSG00000147256	-3.01537	0.00301187	Rho GTPase activating protein 36 [Source:HGNC Symbol;Acc:HGNC:26388]	Yes
PRDX3	ENSG00000165672	0.7706	0.00302636	peroxiredoxin 3 [Source:HGNC Symbol;Acc:HGNC:9354]
MT-CO2	ENSG00000198712	0.8748	0.00303076	mitochondrially encoded cytochrome c oxidase II [Source:HGNC Symbol;Acc:HGNC:7421]
ARPP19	ENSG00000128989	0.443899	0.00304324	cAMP regulated phosphoprotein 19 [Source:HGNC Symbol;Acc:HGNC:16967]
TP53I11	ENSG00000175274	-1.69952	0.00305996	tumor protein p53 inducible protein 11 [Source:HGNC Symbol;Acc:HGNC:16842]	Yes
ENSG00000275888	ENSG00000275888	-1.76133	0.00305996	novel transcript, antisense to CSNK1D	Yes
CHUK	ENSG00000213341	0.476177	0.00307042	component of inhibitor of nuclear factor kappa B kinase complex [Source:HGNC Symbol;Acc:HGNC:1974]
ENSG00000224413	ENSG00000224413	-1.75573	0.00307368	novel transcript	Yes
DECR1	ENSG00000104325	0.827013	0.00307826	2,4-dienoyl-CoA reductase 1 [Source:HGNC Symbol;Acc:HGNC:2753]
VAV3	ENSG00000134215	3.32159	0.00307826	vav guanine nucleotide exchange factor 3 [Source:HGNC Symbol;Acc:HGNC:12659]	Yes
OSTF1	ENSG00000134996	0.57627	0.00307826	osteoclast stimulating factor 1 [Source:HGNC Symbol;Acc:HGNC:8510]
ENSG00000116883	ENSG00000116883	-1.40985	0.00308928	NA
ADIRF-AS1	ENSG00000272734	-0.976639	0.00310003	ADIRF antisense RNA 1 [Source:HGNC Symbol;Acc:HGNC:45127]
ENSG00000259366	ENSG00000259366	-1.18872	0.00311424	novel transcript, sense intronic to HMBOX1
ENC1	ENSG00000171617	-1.99191	0.00311961	ectodermal-neural cortex 1 [Source:HGNC Symbol;Acc:HGNC:3345]	Yes
HABP4	ENSG00000130956	0.639317	0.00314207	hyaluronan binding protein 4 [Source:HGNC Symbol;Acc:HGNC:17062]
PHYH	ENSG00000107537	0.925004	0.00316598	phytanoyl-CoA 2-hydroxylase [Source:HGNC Symbol;Acc:HGNC:8940]
PCAT6	ENSG00000228288	-1.00113	0.00317045	prostate cancer associated transcript 6 [Source:HGNC Symbol;Acc:HGNC:43714]
SSBP4	ENSG00000130511	-0.764204	0.00317588	single stranded DNA binding protein 4 [Source:HGNC Symbol;Acc:HGNC:15676]
ENSG00000266877	ENSG00000266877	-1.65577	0.00317964	novel transcript	Yes
IZUMO4	ENSG00000099840	-0.78866	0.00318728	IZUMO family member 4 [Source:HGNC Symbol;Acc:HGNC:26950]
GRIN2C	ENSG00000161509	-1.77598	0.00320376	glutamate ionotropic receptor NMDA type subunit 2C [Source:HGNC Symbol;Acc:HGNC:4587]	Yes
SH2B3	ENSG00000111252	-1.10476	0.00321428	SH2B adaptor protein 3 [Source:HGNC Symbol;Acc:HGNC:29605]
ZNF768	ENSG00000169957	-0.525145	0.00321564	zinc finger protein 768 [Source:HGNC Symbol;Acc:HGNC:26273]
OXCT2	ENSG00000198754	2.69282	0.00321808	3-oxoacid CoA-transferase 2 [Source:HGNC Symbol;Acc:HGNC:18606]	Yes
LRP1	ENSG00000123384	-1.25014	0.00324112	LDL receptor related protein 1 [Source:HGNC Symbol;Acc:HGNC:6692]
ZNF788P	ENSG00000214189	0.583607	0.00324112	zinc finger family member 788, pseudogene [Source:HGNC Symbol;Acc:HGNC:33112]
ENSG00000225727	ENSG00000225727	-1.67749	0.00328311	filamin A interacting protein 1-like (FILIP1L) pseudogene	Yes
ABCC5	ENSG00000114770	-0.731584	0.00328557	ATP binding cassette subfamily C member 5 [Source:HGNC Symbol;Acc:HGNC:56]
MYPN	ENSG00000138347	2.69881	0.00328557	myopalladin [Source:HGNC Symbol;Acc:HGNC:23246]	Yes
PROS2P	ENSG00000189002	1.36673	0.00329622	protein S (beta) pseudogene [Source:HGNC Symbol;Acc:HGNC:9458]
API5	ENSG00000166181	0.558431	0.00331534	apoptosis inhibitor 5 [Source:HGNC Symbol;Acc:HGNC:594]
C3orf38	ENSG00000179021	0.772223	0.00332861	chromosome 3 open reading frame 38 [Source:HGNC Symbol;Acc:HGNC:28384]
ENSG00000272512	ENSG00000272512	1.81972	0.00332861	novel transcript	Yes
ITGA2	ENSG00000164171	-1.986	0.0033301	integrin subunit alpha 2 [Source:HGNC Symbol;Acc:HGNC:6137]	Yes
PPFIA2	ENSG00000139220	2.38564	0.00333486	PTPRF interacting protein alpha 2 [Source:HGNC Symbol;Acc:HGNC:9246]	Yes
TMED10	ENSG00000170348	0.575873	0.00334206	transmembrane p24 trafficking protein 10 [Source:HGNC Symbol;Acc:HGNC:16998]
FCHO1	ENSG00000130475	-2.25425	0.00334298	FCH and mu domain containing endocytic adaptor 1 [Source:HGNC Symbol;Acc:HGNC:29002]	Yes
MACROD2	ENSG00000172264	1.41751	0.00337587	mono-ADP ribosylhydrolase 2 [Source:HGNC Symbol;Acc:HGNC:16126]
SPTLC3	ENSG00000172296	1.57253	0.00337587	serine palmitoyltransferase long chain base subunit 3 [Source:HGNC Symbol;Acc:HGNC:16253]	Yes
ENSG00000269729	ENSG00000269729	4.22904	0.00337587	novel transcript	Yes
ENSG00000272970	ENSG00000272970	1.21585	0.00337587	novel transcript
PAGE5	ENSG00000158639	4.91413	0.00338444	PAGE family member 5 [Source:HGNC Symbol;Acc:HGNC:29992]	Yes
SLC36A4	ENSG00000180773	0.563517	0.00339638	solute carrier family 36 member 4 [Source:HGNC Symbol;Acc:HGNC:19660]
C5orf22	ENSG00000082213	0.482571	0.00340892	chromosome 5 open reading frame 22 [Source:HGNC Symbol;Acc:HGNC:25639]
TMEM205	ENSG00000105518	0.825886	0.00340892	transmembrane protein 205 [Source:HGNC Symbol;Acc:HGNC:29631]
IL1B	ENSG00000125538	-4.80033	0.00340892	interleukin 1 beta [Source:HGNC Symbol;Acc:HGNC:5992]	Yes
PEX11B	ENSG00000131779	0.706294	0.00340892	peroxisomal biogenesis factor 11 beta [Source:HGNC Symbol;Acc:HGNC:8853]
MGST3	ENSG00000143198	0.991022	0.00340892	microsomal glutathione S-transferase 3 [Source:HGNC Symbol;Acc:HGNC:7064]
CYB5D2	ENSG00000167740	0.636484	0.00340892	cytochrome b5 domain containing 2 [Source:HGNC Symbol;Acc:HGNC:28471]
NOC3L	ENSG00000173145	0.548634	0.00340892	NOC3 like DNA replication regulator [Source:HGNC Symbol;Acc:HGNC:24034]
CHIC1	ENSG00000204116	0.461218	0.00340892	cysteine rich hydrophobic domain 1 [Source:HGNC Symbol;Acc:HGNC:1934]
CACNA1D	ENSG00000157388	2.4014	0.00340897	calcium voltage-gated channel subunit alpha1 D [Source:HGNC Symbol;Acc:HGNC:1391]	Yes
DRAM2	ENSG00000156171	0.589741	0.00342553	DNA damage regulated autophagy modulator 2 [Source:HGNC Symbol;Acc:HGNC:28769]
SH3KBP1	ENSG00000147010	-0.54631	0.00342916	SH3 domain containing kinase binding protein 1 [Source:HGNC Symbol;Acc:HGNC:13867]
SYNPO	ENSG00000171992	-1.34304	0.00342916	synaptopodin [Source:HGNC Symbol;Acc:HGNC:30672]
MTATP6P1	ENSG00000248527	0.661963	0.00342916	MT-ATP6 pseudogene 1 [Source:HGNC Symbol;Acc:HGNC:44575]
ENSG00000275665	ENSG00000275665	-2.05971	0.00342916	novel transcript, antisense to MLLT6	Yes
STARD13	ENSG00000133121	0.607349	0.00343093	StAR related lipid transfer domain containing 13 [Source:HGNC Symbol;Acc:HGNC:19164]
CHST11	ENSG00000171310	-0.814685	0.00343323	carbohydrate sulfotransferase 11 [Source:HGNC Symbol;Acc:HGNC:17422]
EXOC1	ENSG00000090989	0.415177	0.00344151	exocyst complex component 1 [Source:HGNC Symbol;Acc:HGNC:30380]
BPGM	ENSG00000172331	1.04056	0.00344151	bisphosphoglycerate mutase [Source:HGNC Symbol;Acc:HGNC:1093]
ABRACL	ENSG00000146386	0.897236	0.00344417	ABRA C-terminal like [Source:HGNC Symbol;Acc:HGNC:21230]
ENSG00000267397	ENSG00000267397	1.94928	0.00349056	novel transcript	Yes
GPR158	ENSG00000151025	2.91371	0.00349489	G protein-coupled receptor 158 [Source:HGNC Symbol;Acc:HGNC:23689]	Yes
CGRRF1	ENSG00000100532	0.771428	0.00349935	cell growth regulator with ring finger domain 1 [Source:HGNC Symbol;Acc:HGNC:15528]
PLCD3	ENSG00000161714	-0.646041	0.00349935	phospholipase C delta 3 [Source:HGNC Symbol;Acc:HGNC:9061]
PCSK1	ENSG00000175426	2.42276	0.00349935	proprotein convertase subtilisin/kexin type 1 [Source:HGNC Symbol;Acc:HGNC:8743]	Yes
C2CD4D-AS1	ENSG00000234614	2.2311	0.00349935	C2CD4D and THEM5 antisense RNA 1 [Source:HGNC Symbol;Acc:HGNC:54045]	Yes
ENSG00000258317	ENSG00000258317	-2.31398	0.00349935	novel transcript, antisense to ZC3H10 and ESYT1	Yes
HIP1	ENSG00000127946	-0.953218	0.00350231	huntingtin interacting protein 1 [Source:HGNC Symbol;Acc:HGNC:4913]
ICE1	ENSG00000164151	-0.457709	0.00351221	interactor of little elongation complex ELL subunit 1 [Source:HGNC Symbol;Acc:HGNC:29154]
ELP3	ENSG00000134014	0.688108	0.00351242	elongator acetyltransferase complex subunit 3 [Source:HGNC Symbol;Acc:HGNC:20696]
GFM1	ENSG00000168827	0.691657	0.00351242	G elongation factor mitochondrial 1 [Source:HGNC Symbol;Acc:HGNC:13780]
ENSG00000272777	ENSG00000272777	1.08585	0.00351242	novel transcript
CBX2	ENSG00000173894	-1.22978	0.00352273	chromobox 2 [Source:HGNC Symbol;Acc:HGNC:1552]
GDPD3	ENSG00000102886	-1.16885	0.00352512	glycerophosphodiester phosphodiesterase domain containing 3 [Source:HGNC Symbol;Acc:HGNC:28638]
ORC4	ENSG00000115947	0.557312	0.00352512	origin recognition complex subunit 4 [Source:HGNC Symbol;Acc:HGNC:8490]
ROBO3	ENSG00000154134	-1.29216	0.00352512	roundabout guidance receptor 3 [Source:HGNC Symbol;Acc:HGNC:13433]
TMED4	ENSG00000158604	0.526998	0.00352512	transmembrane p24 trafficking protein 4 [Source:HGNC Symbol;Acc:HGNC:22301]
ECMXP	ENSG00000224963	-2.53436	0.00352844	extracellular matrix protein X-linked, pseudogene [Source:HGNC Symbol;Acc:HGNC:55152]	Yes
CCT8P1	ENSG00000226015	0.805016	0.00353788	chaperonin containing TCP1 subunit 8 pseudogene 1 [Source:HGNC Symbol;Acc:HGNC:35144]
DUSP10	ENSG00000143507	0.742186	0.00354937	dual specificity phosphatase 10 [Source:HGNC Symbol;Acc:HGNC:3065]
UEVLD	ENSG00000151116	0.443576	0.00354937	UEV and lactate/malate dehyrogenase domains [Source:HGNC Symbol;Acc:HGNC:30866]
CPEB1	ENSG00000214575	0.830702	0.00356182	cytoplasmic polyadenylation element binding protein 1 [Source:HGNC Symbol;Acc:HGNC:21744]
CEACAM19	ENSG00000186567	-1.67784	0.00356625	CEA cell adhesion molecule 19 [Source:HGNC Symbol;Acc:HGNC:31951]	Yes
CACNB3	ENSG00000167535	-0.791388	0.00356954	calcium voltage-gated channel auxiliary subunit beta 3 [Source:HGNC Symbol;Acc:HGNC:1403]
POSTN	ENSG00000133110	-1.33517	0.00357603	periostin [Source:HGNC Symbol;Acc:HGNC:16953]
ACTR6	ENSG00000075089	0.595604	0.00363291	actin related protein 6 [Source:HGNC Symbol;Acc:HGNC:24025]
ZNF91	ENSG00000167232	-0.634927	0.00364131	zinc finger protein 91 [Source:HGNC Symbol;Acc:HGNC:13166]
LMBR1L	ENSG00000139636	-0.556724	0.00366399	limb development membrane protein 1 like [Source:HGNC Symbol;Acc:HGNC:18268]
CADM1	ENSG00000182985	3.39149	0.00366399	cell adhesion molecule 1 [Source:HGNC Symbol;Acc:HGNC:5951]	Yes
FAM110B	ENSG00000169122	0.813728	0.00366763	family with sequence similarity 110 member B [Source:HGNC Symbol;Acc:HGNC:28587]
SAR1B	ENSG00000152700	0.602022	0.00368246	secretion associated Ras related GTPase 1B [Source:HGNC Symbol;Acc:HGNC:10535]
CCNA2	ENSG00000145386	1.09915	0.00369046	cyclin A2 [Source:HGNC Symbol;Acc:HGNC:1578]
BEAN1	ENSG00000166546	-1.81156	0.00370114	brain expressed associated with NEDD4 1 [Source:HGNC Symbol;Acc:HGNC:24160]	Yes
LNPK	ENSG00000144320	0.613587	0.00371611	lunapark, ER junction formation factor [Source:HGNC Symbol;Acc:HGNC:21610]
PIGK	ENSG00000142892	0.723968	0.00371636	phosphatidylinositol glycan anchor biosynthesis class K [Source:HGNC Symbol;Acc:HGNC:8965]
C21orf58	ENSG00000160298	-0.896069	0.00372836	chromosome 21 open reading frame 58 [Source:HGNC Symbol;Acc:HGNC:1300]
NETO2	ENSG00000171208	-1.01398	0.00372836	neuropilin and tolloid like 2 [Source:HGNC Symbol;Acc:HGNC:14644]
CAMK2D	ENSG00000145349	0.747751	0.00377306	calcium/calmodulin dependent protein kinase II delta [Source:HGNC Symbol;Acc:HGNC:1462]
MBNL1	ENSG00000152601	0.809646	0.00377306	muscleblind like splicing regulator 1 [Source:HGNC Symbol;Acc:HGNC:6923]
CLGN	ENSG00000153132	3.62995	0.00377306	calmegin [Source:HGNC Symbol;Acc:HGNC:2060]	Yes
NCAPD3	ENSG00000151503	0.42164	0.00377494	non-SMC condensin II complex subunit D3 [Source:HGNC Symbol;Acc:HGNC:28952]
TMEM147	ENSG00000105677	1.04776	0.00380289	transmembrane protein 147 [Source:HGNC Symbol;Acc:HGNC:30414]
TMEM44	ENSG00000145014	-0.926554	0.00380289	transmembrane protein 44 [Source:HGNC Symbol;Acc:HGNC:25120]
REM1	ENSG00000088320	4.5084	0.00380368	RRAD and GEM like GTPase 1 [Source:HGNC Symbol;Acc:HGNC:15922]	Yes
BORCS7	ENSG00000166275	0.602843	0.0038296	BLOC-1 related complex subunit 7 [Source:HGNC Symbol;Acc:HGNC:23516]
PRXL2C	ENSG00000158122	0.656046	0.00386104	peroxiredoxin like 2C [Source:HGNC Symbol;Acc:HGNC:16881]
SACM1L	ENSG00000211456	0.432357	0.00386234	SAC1 like phosphatidylinositide phosphatase [Source:HGNC Symbol;Acc:HGNC:17059]
POLR2K	ENSG00000147669	0.817461	0.00386849	RNA polymerase II, I and III subunit K [Source:HGNC Symbol;Acc:HGNC:9198]
ACOT1	ENSG00000184227	1.45951	0.00386849	acyl-CoA thioesterase 1 [Source:HGNC Symbol;Acc:HGNC:33128]
TDRD7	ENSG00000196116	0.627917	0.00386849	tudor domain containing 7 [Source:HGNC Symbol;Acc:HGNC:30831]
MRGPRF	ENSG00000172935	1.30807	0.00389675	MAS related GPR family member F [Source:HGNC Symbol;Acc:HGNC:24828]
DSEL	ENSG00000171451	0.925809	0.00390027	dermatan sulfate epimerase like [Source:HGNC Symbol;Acc:HGNC:18144]
SLC45A4	ENSG00000022567	-0.914963	0.0039073	solute carrier family 45 member 4 [Source:HGNC Symbol;Acc:HGNC:29196]
RNF24	ENSG00000101236	-0.674563	0.0039073	ring finger protein 24 [Source:HGNC Symbol;Acc:HGNC:13779]
KCNJ2	ENSG00000123700	2.28461	0.0039073	potassium inwardly rectifying channel subfamily J member 2 [Source:HGNC Symbol;Acc:HGNC:6263]	Yes
HAND2	ENSG00000164107	7.69173	0.0039073	heart and neural crest derivatives expressed 2 [Source:HGNC Symbol;Acc:HGNC:4808]	Yes
COL4A2-AS2	ENSG00000224821	-2.45907	0.0039073	COL4A2 antisense RNA 2 [Source:HGNC Symbol;Acc:HGNC:39849]	Yes
ENSG00000260604	ENSG00000260604	-2.13617	0.0039073	novel transcript	Yes
CARD11	ENSG00000198286	-5.01394	0.00391533	caspase recruitment domain family member 11 [Source:HGNC Symbol;Acc:HGNC:16393]	Yes
ADAMTS16-DT	ENSG00000250579	-4.46465	0.00391533	ADAMTS16 divergent transcript [Source:HGNC Symbol;Acc:HGNC:55548]	Yes
ACADS	ENSG00000122971	0.748125	0.00391874	acyl-CoA dehydrogenase short chain [Source:HGNC Symbol;Acc:HGNC:90]
GPR176	ENSG00000166073	0.839861	0.00392714	G protein-coupled receptor 176 [Source:HGNC Symbol;Acc:HGNC:32370]
LPAR2	ENSG00000064547	-1.17221	0.00394384	lysophosphatidic acid receptor 2 [Source:HGNC Symbol;Acc:HGNC:3168]
IL32	ENSG00000008517	-2.32653	0.00394572	interleukin 32 [Source:HGNC Symbol;Acc:HGNC:16830]	Yes
SMG6	ENSG00000070366	-0.826328	0.00398886	SMG6 nonsense mediated mRNA decay factor [Source:HGNC Symbol;Acc:HGNC:17809]
PNPLA4	ENSG00000006757	0.794248	0.00406265	patatin like phospholipase domain containing 4 [Source:HGNC Symbol;Acc:HGNC:24887]
B4GALT1-AS1	ENSG00000233554	1.09464	0.00407577	B4GALT1 antisense RNA 1 [Source:HGNC Symbol;Acc:HGNC:49910]
INHBE	ENSG00000139269	-1.8849	0.00409537	inhibin subunit beta E [Source:HGNC Symbol;Acc:HGNC:24029]	Yes
ADAMTSL3	ENSG00000156218	-1.83227	0.00409929	ADAMTS like 3 [Source:HGNC Symbol;Acc:HGNC:14633]	Yes
LASTR	ENSG00000242147	-2.44197	0.00411289	lncRNA associated with SART3 regulation of splicing [Source:HGNC Symbol;Acc:HGNC:54143]	Yes
TMEM132A	ENSG00000006118	-0.930263	0.00411298	transmembrane protein 132A [Source:HGNC Symbol;Acc:HGNC:31092]
SLC22A15	ENSG00000163393	1.25402	0.00411298	solute carrier family 22 member 15 [Source:HGNC Symbol;Acc:HGNC:20301]
GRIN3B	ENSG00000116032	-1.57641	0.00412488	glutamate ionotropic receptor NMDA type subunit 3B [Source:HGNC Symbol;Acc:HGNC:16768]	Yes
PACC1	ENSG00000065600	0.768349	0.00413336	proton activated chloride channel 1 [Source:HGNC Symbol;Acc:HGNC:25593]
FBXO28	ENSG00000143756	0.476593	0.00414478	F-box protein 28 [Source:HGNC Symbol;Acc:HGNC:29046]
ADAMTS3	ENSG00000156140	1.49088	0.00417094	ADAM metallopeptidase with thrombospondin type 1 motif 3 [Source:HGNC Symbol;Acc:HGNC:219]
G3BP1	ENSG00000145907	0.664686	0.00418023	G3BP stress granule assembly factor 1 [Source:HGNC Symbol;Acc:HGNC:30292]
SMARCD1	ENSG00000066117	-0.582907	0.00422079	SWI/SNF related, matrix associated, actin dependent regulator of chromatin, subfamily d, member 1 [Source:HGNC Symbol;Acc:HGNC:11106]
PDGFD	ENSG00000170962	2.22528	0.00425188	platelet derived growth factor D [Source:HGNC Symbol;Acc:HGNC:30620]	Yes
ABCA13	ENSG00000179869	2.11608	0.00426265	ATP binding cassette subfamily A member 13 [Source:HGNC Symbol;Acc:HGNC:14638]	Yes
MPHOSPH6	ENSG00000135698	0.651685	0.00426649	M-phase phosphoprotein 6 [Source:HGNC Symbol;Acc:HGNC:7214]
GOLGA6L10	ENSG00000278662	-1.63899	0.00427115	golgin A6 family like 10 [Source:HGNC Symbol;Acc:HGNC:37228]	Yes
MRC2	ENSG00000011028	-1.01599	0.00428773	mannose receptor C type 2 [Source:HGNC Symbol;Acc:HGNC:16875]
EIF3F	ENSG00000175390	-0.472896	0.0042994	eukaryotic translation initiation factor 3 subunit F [Source:HGNC Symbol;Acc:HGNC:3275]
[truncated: 2,200 more rows]

## Sheet: Table S5
Table S5: List of genes differentially regulated in the same direction for both species
[truncated: 764 more rows]
